# Supplementary material for: De Novo Assembly and Genome Analyses of the Marine-Derived Scopulariopsis brevicaulis Strain LF580 Unravels Life-Style Traits and Anticancerous Scopularide Biosynthetic Gene Cluster
Source: PLoS One. 2015 Oct 27;10(10):e0140398. doi: 10.1371/journal.pone.0140398 (PMC4624724; doi:10.1371/journal.pone.0140398)
Supplement: S5 Table — (XLS) [file pone.0140398.s008.xls]

## Sheet: Clusters
Name	PfamID	ClusterId	Rhizopus_oryzae	Pichia_stipitis	Candida_albicans	Pichia_pastoris	Saccharomyces_cerevisiae	Yarrowia_lipolytica	Uncinocarpus_reesii	Aspergillus_oryzae	Aspergillus_niger	Aspergillus_nidulans	Penicillium_chrysogenum	Phaeosphaeria_nodorum	Neurospora_crassa	Magnaporthe_grisea	Trichoderma_reesei	Trichoderma_atroviride	Metarhizium_acridum	Metarhizium_anisopliae	Fusarium_graminearum	Nectria_haematococca	Glomerella_graminicola	Verticillium_dahliae	Scopulariopsis	Phanerochaete_chrysosporium	Ustilago_maydis	Puccinia_graminis	Other Sordatiomycetes median	Saccharomyces_cerevisiae_IDs	Neurospora_crassa_IDs	Aspergillus_niger_IDs	Scopulariopsis_IDs
Cytochrome P450	IPR001128_PF00067	Cluster_1	49	10	11	4	3	17	38	150	142	115	98	144	36	132	71	67	87	113	109	155	143	67	77	136	20	17	98	P10614,P21595,P54781	Q7RWD1,Q7S0G0,Q7S8K7,Q7S811,Q7SAA4,Q7S1V4,Q7S330,Q7S559,Q7S560,Q7SCW8,Q7RVV0,Q7S0J5,Q7S1N3,Q7S3P0,Q7S429,Q7S534,Q7SDI6,Q7SFP7,Q7S3F8,Q7S8A1,Q7RUZ0,Q7S0S8,Q7SD37,Q7SGM1,Q7RV13,Q7RWM0,Q7S0U0,Q7S4K3,Q7S683,Q7SEE6,Q7S8E0,Q7SDQ4,Q872P5,Q9HFJ1,Q9P398,Q9P654	A2QE51,A2QKK2,A2QLZ5,A2QNP1,A2QQ56,A2QTA0,A2QTF8,A2QZD1,A2R1Q5,A2R6G9,A2R981,A5AB92,A2Q7H0,A2Q9Q2,A2QAK8,A2QBE8,A2QBI3,A2QGB4,A2QJV1,A2QLD1,A2QVM8,A2QVS8,A2QW23,A2QWM1,A2QYG5,A2QZL6,A2R0R9,A2R3C9,A2R5P9,A2R7A3,A5AAH7,A2Q7F5,A2QEF0,A2QF47,A2QFB8,A2QH38,A2QJV9,A2QLB7,A2QT93,A2QTE8,A2QTT5,A2QW56,A2QZA6,A2R1Z6,A2R356,A2R5P5,A2R9U6,A2RAD1,A2Q7D2,A2QEG0,A2QIB6,A2QLX8,A2QR29,A2QS12,A2QSB5,A2QT28,A2QTG3,…	g8214.t1,g12411.t1,g66.t1,g5975.t1,g11799.t1,g14353.t1,g16192.t1,g3579.t1,g10673.t1,g5866.t1,g194.t1,g1156.t1,g1251.t1,g1382.t1,g1658.t1,g3673.t1,g3928.t1,g3968.t1,g4555.t1,g5754.t1,g7823.t1,g8926.t1,g9075.t1,g10145.t1,g9403.t1,g9838.t1,g10832.t1,g10936.t1,g11066.t1,g11544.t1,g11222.t1,g11756.t1,g11930.t1,g12256.t1,g12897.t1,g14299.t1,g15711.t1,g15877.t1,g15920.t1,g6278.t1,g6342.t1,g6879.t1,g6940…
Protein kinase domain	IPR000719_PF00069	Cluster_1	134	36	36	35	49	30	37	36	37	35	39	39	37	37	36	39	47	38	37	41	32	35	37	57	36	51	37	P53104,P53894,P32562,P38147,P32328,P22204,P39009,P32801,Q12263,P34244,P38991,P31374,P06244,P06245,P05986,P38070,P27466,P22517,P25389,P53233,P43637,P13185,P13186,Q01919,P25341,P28708,P36003,Q03533,P53739,Q08217,Q12236,P24583,P38691,P24719,P38990,Q03407,Q03306,P22216,P38622,P38623,P43565,P11792,Q12505,P06782,Q03785,Q03002,Q12152,P12688,P18961	Q7RX99,P38679,P87253,O42626,Q7S6A6,Q7S6G1,Q7SBS5,Q7SFS8,Q7SFT1,Q7RYZ4,Q7S2F1,Q7S2I4,Q7SCM9,Q7SCT1,Q7RVR5,Q7RVS8,Q7S2M5,Q7SGR8,Q7SGW9,Q7RYZ3,Q7S031,Q7SBJ3,Q7SBQ8,Q7SCY3,Q7SEK0,Q7SGX2,Q7SHX1,Q7RVX6,Q7RYI8,Q7RYM0,Q7S434,Q7SF52,Q7SFD3,Q870R2,Q873K1,Q9C2E8,Q9P466	A2Q9A3,A2QQQ6,A2QQY4,A2R7R9,A2QBU9,A2QIL5,A2R082,A2R594,A2QD16,A2QN97,A2QNW1,A2R0G6,A2R163,A2R5A8,A2R7C5,A2RA98,A2RB37,A2QAV5,A2QNB6,A2QX33,A2R7K5,A2R9L6,A2QCP3,A2QKG1,A2QWG0,A2QD52,A2QWK5,A2R5J4,A2RBD3,A2QDX5,A2QGQ1,A2QGW4,A2QP26,A2QSD3,A2QWG9,A2R9F5,A2RAI3	g12468.t1,g2893.t1,g5108.t1,g15188.t1,g1910.t1,g2813.t1,g15158.t1,g5571.t1,g9055.t1,g12555.t1,g6764.t1,g7939.t1,g3778.t1,g7353.t1,g9827.t1,g13253.t1,g10066.t1,g11836.t1,g2209.t1,g3127.t1,g496.t1,g14191.t1,g14959.t1,g2756.t1,g7943.t1,g12392.t1,g2687.t1,g517.t1,g8912.t1,g11716.t1,g10536.t1,g9454.t1,g4240.t1,g4780.t1,g582.t1,g13186.t1,g9767.t1
Major facilitator superfamily	IPR011701_PF07690	Cluster_1	14	10	7	10	4	29	24	65	37	51	41	66	20	40	21	31	29	31	60	108	60	48	71	19	10	14	35.5	P25621,P39709,P53322,P53241	Q7S6B2,Q7S776,Q7SB34,Q7SBE4,Q7S5C9,Q7SCT9,Q7RUS1,Q7S2U8,Q7S243,Q7S441,Q7S524,Q7S6S0,Q7RX92,Q7SAC5,Q7SC46,Q7SC88,Q7RWQ6,Q7SFU8,Q86ZH9,Q8NIY4	A2Q927,A2Q9E3,A2QFJ0,A2QRV9,A2R227,A2QH84,A2QHD9,A2R0R2,A2QVK2,A2QZI8,A2R6D8,A2R6P3,A2R6P4,A2R8V7,A2QA65,A2QYL0,A2R0M7,A2R2L4,A2QH79,A2QW53,A2R207,A2R6V4,A2Q7W1,A2QV21,A2R0X7,A2R5Y4,A2R6I5,A2R9S5,A2QBD9,A2QG10,A2QW19,A2Q9R2,A2R0E4,A2R1W5,A2R2F8,A2R6S1,Q1ZYK4	g14595.t1,g8259.t1,g116.t1,g12.t1,g7860.t1,g82.t1,g10910.t1,g11233.t1,g14643.t1,g15739.t1,g12236.t1,g6862.t1,g2429.t1,g10629.t1,g14395.t1,g6722.t1,g2921.t1,g4349.t1,g4596.t1,g5551.t1,g7731.t1,g80.t1,g8024.t1,g8849.t1,g9639.t1,g12148.t1,g13687.t1,g14874.t1,g6382.t1,g6420.t1,g12670.t1,g13338.t1,g13679.t1,g17.t1,g2614.t1,g2916.t1,g3088.t1,g3977.t1,g3993.t1,g41.t1,g5245.t1,g7493.t1,g8192.t1,g944.t1,g…
General substrate transporter	IPR005828_PF00083	Cluster_1	30	22	23	14	27	19	12	79	65	64	73	50	23	29	30	36	28	25	45	71	40	37	45	15	14	13	33	P13181,P43581,P54862,P39924,P42833,P54854,P47185,P53631,P32465,P23585,P32466,P32467,P38695,P39003,P39004,P40886,P40885,P30605,P30606,Q12300,P10870,P39932,P53142,P38142,Q12407,Q04162,P43562	P11636,Q92253,Q7RV14,Q7RWH1,Q7S6W6,Q7S496,Q7S9U8,Q7RXF1,Q7S0I5,Q7S6X8,Q7SD36,Q7S3Q4,Q7S4B3,Q7S4D2,Q7S9G3,Q7SEB3,Q7SC74,Q7S5F0,Q7SC67,Q7S2N0,Q7S5X9,Q870X7,Q8WZY1	A2Q8V8,A2QEI9,A2QPR6,A2QU92,A2R0Q0,A2R320,A2R6Y1,A2Q7I4,A2QG79,A2QVE3,A2QDQ0,A2QKC2,A2QL46,A2QN52,A2QQX4,A2QTQ5,A2R2N2,A2R8C1,A2Q9R1,A2QBM7,A2QKT1,A2QKZ6,A2QM92,A2QU79,A2QZQ8,A2R055,A2R3H2,A2R482,A2QBB1,A2QHL9,A2QKM7,A2QLB0,A2QQ95,A2QXN5,A2R9S6,A5ABZ0,A2Q7I7,A2QBH4,A2QCH0,A2QDY2,A2QG25,A2QJR8,A2QM97,A2QNT0,A2QW35,A2QYK4,A2R419,A2R5T0,A5ABF4,A2QAC5,A2QDP7,A2QEH1,A2QKK1,A2QLZ3,A2QX19,A2R841,A2R8B8,…	g11997.t1,g6510.t1,g5535.t1,g984.t1,g13370.t1,g2335.t1,g14394.t1,g3036.t1,g10438.t1,g5011.t1,g8861.t1,g13259.t1,g2608.t1,g3031.t1,g111.t1,g11669.t1,g5809.t1,g8992.t1,g11731.t1,g13525.t1,g14327.t1,g14524.t1,g5481.t1,g3019.t1,g8014.t1,g6288.t1,g6851.t1,g11785.t1,g1097.t1,g29.t1,g13926.t1,g1.t1,g1331.t1,g3025.t1,g3616.t1,g3919.t1,g4383.t1,g4542.t1,g10681.t1,g11065.t1,g11295.t1,g13316.t1,g14366.t1,g7…
Major facilitator superfamily	IPR011701_PF07690	Cluster_4	8	14	6	4	7	4	15	50	46	31	35	34	14	28	17	38	18	31	29	48	40	16	15	18	9	2	28.5	P50080,P33335,Q04301,P38358,P25594,Q04602,P36172	Q7S0T6,Q7SET5,Q7S7S4,Q7S0L9,Q7S546,Q7SA00,Q7RZ82,Q7S509,Q7S717,Q7SFH4,Q7SHQ3,Q7S2B0,Q871F6,Q8X0G2	A2Q8E9,A2QC98,A2QTD0,A2QW03,A2QYX6,A2QZL8,A2QAF2,A2QLY5,A2QQT5,A2QT27,A2Q7S9,A2QDU4,A2QET9,A2QFT3,A2QWT8,A2QWY1,A2R0E7,A2R5P4,A2QBE9,A2QF13,A2QLX6,A2QXE3,A2QM88,A2QPE1,A2QWK8,A2R2J6,A2R3H8,A2R500,A2R6Y0,A2Q7M7,A2QG42,A2QJ92,A2QKB3,A2R949,A2QLD2,A2QT55,A2R0H4,A2R6H7,A2R8R4,A2RAC2,A2Q7W3,A2QH04,A2QIJ7,A2QKN9,A2QTU9,A2R1J4	g15818.t1,g3115.t1,g12643.t1,g9353.t1,g15336.t1,g6374.t1,g13522.t1,g6584.t1,g3405.t1,g15357.t1,g16075.t1,g5322.t1,g8205.t1,g13284.t1,g4236.t1
Major facilitator superfamily	IPR011701_PF07690	Cluster_3	4	12	9	5	6	12	15	74	73	43	55	37	14	14	23	42	25	29	31	46	29	22	16	26	18	1	27	P38124,Q07824,P53283,Q06451,Q12256,P38776	Q7RY09,Q7RZB8,Q7S359,Q7S4A3,Q7S874,Q7S0F5,Q7S3X1,Q7S4M0,Q7SDR9,Q7S0V2,Q7S1X1,Q7S6Y3,Q7RZQ8,Q873D4	A2Q7D5,A2Q9W6,A2QBW8,A2QCH8,A2QJU0,A2QQE9,A2R0S7,A2R1C3,A2R5T2,A2R6P8,A2R9W8,A2R9Y9,A2RB43,A5AB77,A2QAH5,A2QBB8,A2QBJ6,A2QK70,A2QTI3,A2QXB5,A2QYX2,A2QZS9,A2R5T9,A2R6I1,A5ABT3,A2QCI3,A2QFG6,A2QJN4,A2QUB7,A2R1R4,A2R218,A2R9E4,A5AB03,A2QTL1,A2QUV7,A2QX21,A2QXI9,A2R052,A2R488,A2R6Q1,A2R6T3,A5AC02,A2QH65,A2QLQ0,A2QM76,A2QSJ7,A2QTU7,A2QTZ3,A2R257,A2QCQ8,A2QEA4,A2QKV2,A2QM00,A2QNN7,A2QXH6,A2QXI8,A2QYX0,…	g5717.t1,g5808.t1,g13446.t1,g7199.t1,g7209.t1,g12580.t1,g12953.t1,g6279.t1,g6861.t1,g8337.t1,g13704.t1,g14001.t1,g6841.t1,g10415.t1,g7488.t1,g8359.t1
Transcription factor domain, fungi	IPR007219_PF04082	Cluster_1	2	10	5	8	6	6	9	52	66	46	41	24	12	19	20	34	18	28	38	68	32	25	56	15	5	1	26.5	P39113,P04386,P07272,P38699,P40467,P39529	P87000,Q7RXV3,Q7S861,Q7S8Q2,Q7S1R3,Q7S9N1,Q7RXQ3,Q7S9X3,Q7S8Q1,Q7SAJ9,Q8WZK9,Q9HE23	A2Q9J1,A2QDP8,A2QF03,A2QKP1,A2QM31,A2QW43,A2QYK8,A2QZ01,A2R2N3,A2R6Y5,A2R8C4,A2QB02,A2QLP5,A2QTM3,A2QXH0,A2QYD4,A5AB82,A2QBE0,A2QBS7,A2QEH3,A2QKQ2,A2QPB5,A2QWI6,A2R6I7,A2R844,A5ABH2,A2QF53,A2QM94,A2QXN4,A2R5I3,A2R7L9,A2QAE9,A2QG39,A2QSJ8,A2QW52,A2QXD0,A2R6W0,A2RBK1,A2QGW8,A2QKW7,A2QNM9,A2QQT6,A2QRM7,A2QTA4,A2QTP9,A2QVD9,A2QYK7,A2R6L0,A2Q9J2,A2QAG0,A2QB49,A2QFY3,A2QH87,A2QQB5,A2QS14,A2R2M4,A2R324,…	g1255.t1,g6696.t1,g1352.t1,g2010.t1,g2422.t1,g2592.t1,g39.t1,g5545.t1,g5756.t1,g5770.t1,g7494.t1,g8004.t1,g8846.t1,g10187.t1,g11058.t1,g13445.t1,g13662.t1,g14037.t1,g6685.t1,g3197.t1,g5767.t1,g7662.t1,g105.t1,g2073.t1,g11145.t1,g11340.t1,g12562.t1,g16104.t1,g1245.t1,g4574.t1,g8191.t1,g15475.t1,g4502.t1,g7664.t1,g855.t1,g9633.t1,g11787.t1,g15379.t1,g6570.t1,g20.t1,g4993.t1,g5481.t1,g3977.t1,g7081.…
FAD linked oxidase, N-terminal	IPR006094_PF01565	Cluster_1	0	0	0	0	0	0	6	41	39	37	27	46	16	29	19	31	17	22	34	53	28	25	22	9	5	4	26.5		Q7SCE5,Q7SHH8,Q7RV07,Q7RWM5,Q7S915,Q7S350,Q7S0U1,Q7S1P7,Q7SB35,Q7S352,Q7SHH7,Q7S1N4,Q7S9A7,Q8NIW9,Q8X0G1,Q9P6Z1	A2Q7P2,A2QTF5,A2QW39,A2QWN7,A2RBM3,A5ABF8,A2QDR0,A2QT98,A2R352,A2Q7F3,A2QFR3,A2QHB3,A2QUX1,A2R5H1,A2R9X1,A2QBP2,A2QL34,A2QN48,A2QTE6,A2R023,A2R4X5,A2RAG6,A2Q9P6,A2QAH0,A2QH13,A2QS48,A2QX39,A2R340,A2QBA2,A2QBC5,A2QFW6,A2QMJ7,A2QAE2,A2QH89,A2QRI7,A2QBL4,A2QIR4,A2QXI4,A5ABH0	g12883.t1,g7210.t1,g3716.t1,g11611.t1,g1108.t1,g1270.t1,g1353.t1,g6580.t1,g2476.t1,g3939.t1,g4122.t1,g5413.t1,g5941.t1,g6015.t1,g8204.t1,g10858.t1,g13987.t1,g1276.t1,g3719.t1,g7999.t1,g7519.t1,g8202.t1
Helicase, C-terminal	IPR001650_PF00271	Cluster_1	38	23	24	24	24	24	22	23	25	22	24	23	23	24	23	23	24	24	24	24	24	22	24	22	26	23	24	Q12389,P24784,P24783,P20447,P20448,P20449,P53734,P36120,P38719,Q06218,P06634,P39517,P32892,Q12099,Q03532,P10081,P38112,P15424,P23394,P21372,P45818,P38712,P25808,Q07478	Q7S9J4,Q7SBC6,Q7S5R1,Q7RZ35,Q8X0X2,Q7S873,Q7RYZ7,Q7S6F3,Q9P6U9,Q7S5D9,P0C2N8,Q9P735,Q7S2N9,Q7RV88,Q7RZH4,Q7SEL0,Q7SH33,Q7SFC8,Q7RY59,Q873H9,Q7SFQ7,Q7S806,Q8NJW1	A2QRY2,A2QC74,A2QFL3,A2QS00,A2QUY7,A2QA23,A2RA55,A5AA68,A2QCW6,A2QI25,A2QY39,A2QAX7,A5AAE5,A2Q9T6,A2QEN5,A2QWW0,A2QIL2,A2QQA8,A2QAB5,A2RB17,A2QE29,A2R0B5,A2R3A8,A2QF74,A2Q7H9	g2979.t1,g12456.t1,g9420.t1,g11890.t1,g170.t1,g3502.t1,g6205.t1,g14377.t1,g10905.t1,g4320.t1,g3699.t1,g4067.t1,g12383.t1,g11762.t1,g6901.t1,g8537.t1,g11682.t1,g8831.t1,g14269.t1,g9775.t1,g10258.t1,g5967.t1,g3733.t1,g14108.t1
DNA/RNA helicase, DEAD/DEAH box type, N-terminal	IPR011545_PF00270	Cluster_1	39	23	23	24	24	24	23	25	25	24	24	24	23	24	23	23	24	24	24	24	24	24	25	23	28	24	24	Q12389,P24784,P24783,P20447,P20448,P20449,P53734,P36120,P38719,Q06218,P06634,P39517,P32892,Q12099,Q03532,P10081,P38112,P15424,P23394,P21372,P45818,P38712,P25808,Q07478	Q7S9J4,Q7SBC6,Q7S5R1,Q7RZ35,Q8X0X2,Q7S873,Q7RYZ7,Q7S6F3,Q9P6U9,Q7S5D9,P0C2N8,Q9P735,Q7S2N9,Q7RV88,Q7RZH4,Q7SEL0,Q7SH33,Q7SFC8,Q7RY59,Q873H9,Q7SFQ7,Q7S806,Q8NJW1	A2QRY2,A2QC74,A2QFL3,A2QS00,A2QUY7,A2QA23,A2RA55,A5AA68,A2QCW6,A2QI25,A2QY39,A2QAX7,A5AAE5,A2Q9T6,A2QEN5,A2QWW0,A2QIL2,A2QQA8,A2QAB5,A2RB17,A2QE29,A2R0B5,A2R3A8,A2QF74,A2Q7H9	g2979.t1,g12456.t1,g9420.t1,g11890.t1,g170.t1,g3502.t1,g6205.t1,g14377.t1,g10905.t1,g4320.t1,g3699.t1,g4067.t1,g12383.t1,g13039.t1,g11762.t1,g6901.t1,g8537.t1,g11682.t1,g8831.t1,g14269.t1,g9775.t1,g10258.t1,g5967.t1,g3733.t1,g14108.t1
Aldehyde dehydrogenase domain	IPR015590_PF00171	Cluster_1	15	10	11	9	9	14	14	30	28	27	36	23	13	17	20	24	23	24	30	66	24	22	35	20	16	12	23.5	P47771,P54114,P46367,P40047,P54115,P07275,P38067,P38694,Q04458	Q7SDE2,Q7SET1,Q7SFB1,Q7RYT1,Q7S8W6,Q7SF12,Q7S5U4,Q7S275,Q7SDT4,Q7SF44,Q870P2,Q8NIT1,Q8X0L4	A2Q9M6,A2QIG1,A2QWR5,A2R2P1,A2Q9V7,A2QBG5,A2QNB0,A2Q7G4,A2QC50,A2QSI3,A2QV34,A2R0T2,A2R332,A2R5X5,A2RAR4,A2R1P2,A2R4V5,A2R8H6,A2R911,A2R9D4,A5ABS7,A2QI83,A2QSZ7,A2QRU8,A5AAZ8,A2QU06,A2RAR9,A5AC05	g11736.t1,g1150.t1,g1256.t1,g1768.t1,g1807.t1,g2986.t1,g5039.t1,g886.t1,g10741.t1,g13609.t1,g14866.t1,g15231.t1,g15889.t1,g11312.t1,g10893.t1,g12475.t1,g14917.t1,g4568.t1,g11651.t1,g5046.t1,g11816.t1,g13992.t1,g9777.t1,g8193.t1,g978.t1,g6534.t1,g3200.t1,g4979.t1,g7197.t1,g8478.t1,g12162.t1,g12573.t1,g13995.t1,g15233.t1,g11871.t1
WD40 repeat	IPR001680_PF00400	Cluster_1	50	10	12	12	12	16	14	27	23	20	23	13	13	12	28	45	26	22	23	28	16	13	23	32	17	17	22.5	P07834,P38011,P39014,P39946,Q12417,P20053,P38123,P38129,P16649,P25382,P40042,P53196	Q01369,Q7RY30,Q7S7L4,P78706,Q01277,Q7RYJ1,Q7SFT7,Q7S199,Q7SCM7,Q7S2D9,Q7S5P6,Q9C2E3,Q9P3P7	A2Q912,A2Q9I6,A2R251,A5AB88,A2QX40,A2QAM5,A2QCM9,A2QS35,A2QT36,A2QDN2,A2QSE6,A2QSW7,A2QQK1,A2RA45,A2QCU8,A2QP30,A2QVJ5,A2Q9R8,A2QW12,A2Q8R6,A2QIK5,A2QY86,A5ABW1	g12702.t1,g15619.t1,g16180.t1,g4095.t1,g5623.t1,g4689.t1,g12334.t1,g15621.t1,g15209.t1,g15590.t1,g16187.t1,g16276.t1,g10175.t1,g6612.t1,g16288.t1,g10107.t1,g2759.t1,g2214.t1,g14715.t1,g10614.t1,g2643.t1,g5996.t1,g12394.t1
Alcohol dehydrogenase, C-terminal	IPR013149_PF00107	Cluster_1	16	16	11	8	12	7	12	43	40	33	38	33	12	15	18	29	20	22	29	64	21	24	30	19	13	9	21.5	P00330,P00331,P07246,P38113,Q04894,P25377,P39714,P35497,Q07786,P32771,Q07993,P39713	Q9P6C8,Q7SI09,Q7S6L2,Q7RY77,Q7RZV3,Q7S9B3,Q7SC51,Q7SHA1,Q7RV37,Q7SG88,Q7SFE0,Q8X0U5	A2Q7Q7,A2QCA7,A2QL21,A2R2W2,A2QBA8,A2QBG7,A2QM95,A2QU04,A2QV03,A2QW33,A2QW77,A2QUX4,A2R0V6,A2R6Z2,A2QF02,A2QHC9,A2QUV3,A2R396,A2R610,A2Q889,A2QH11,A2R288,A2R9I3,A5AB83,A5ABB8,A2QAN5,A2QFZ8,A2R229,A2R6L2,A2QKZ5,A2QNV6,A2Q7G5,A2QS17,A2QYB6,A2R0U3,A2R5K3,A2R772,Q58FL9,Q5GN51,Q5GN52	g1269.t1,g2.t1,g3922.t1,g3954.t1,g7887.t1,g89.t1,g10279.t1,g10831.t1,g11240.t1,g11284.t1,g12410.t1,g12441.t1,g14368.t1,g13916.t1,g4093.t1,g3816.t1,g9638.t1,g14289.t1,g16210.t1,g8473.t1,g4538.t1,g9850.t1,g5533.t1,g7804.t1,g981.t1,g10757.t1,g14494.t1,g2843.t1,g7590.t1,g12940.t1
Major facilitator superfamily	IPR011701_PF07690	Cluster_5	13	9	7	4	4	8	11	37	30	21	25	26	7	12	22	25	21	22	20	39	21	21	21	12	6	0	21	P53918,P36032,Q08268,Q08777	Q7S5C1,Q7SDJ0,Q7RZ28,Q7RX43,Q7SFT0,Q7S2B1,Q872Z4	A2Q7Q8,A2QCD5,A2QYH4,A2QYT0,A2Q7V3,A2QXB2,A2QY15,A2R2R4,A2RAZ6,A5AAC3,A5ABA1,A2QFN5,A2QM47,A2R6Z0,A5ABG1,A2Q9D9,A2QJL7,A2QKY3,A2Q8H8,A2QAN7,A2QJU7,A2QV37,A2QX49,A2R2Q1,A2QXA4,A2QAJ7,A2Q7E4,A2QUG5,A2R8D7,A2RAW8	g2383.t1,g2578.t1,g3320.t1,g9705.t1,g12639.t1,g12784.t1,g3608.t1,g4103.t1,g5027.t1,g11962.t1,g10459.t1,g14675.t1,g14984.t1,g15089.t1,g6210.t1,g1409.t1,g10684.t1,g7535.t1,g3491.t1,g4557.t1,g7844.t1
ATPase, AAA-type, core	IPR003959_PF00004	Cluster_1	30	19	20	19	21	19	19	19	20	18	19	20	19	21	19	20	20	21	19	21	20	19	19	18	17	19	20	P32794,P39925,P25694,P28737,P38126,P24004,P33760,P53549,P40327,P33297,P33298,P33299,Q01939,P40341,Q07844,P39955,P18759,P40328,P40340,P52917,P32795	Q7SGP2,Q7S2J5,Q7S9F4,Q7SAQ2,Q7S4D9,Q7SD08,Q7RY87,Q7RYJ0,Q7S0H4,Q7S7Z2,Q7RVB2,Q7RVQ0,Q7RZ60,Q7SDQ8,Q873H3,Q8X056,Q9HDH1,Q9P5S3,Q9P665	A2R964,A2R2A1,A2R2B7,A2QEZ6,A2QPZ5,A2R7C1,A2QDI2,A2R7V4,A2R8Y8,A2RB25,A2QAB3,A2QIW5,A2R722,A2RBC4,A2QBY4,A2QK32,A2QLM2,A2R2I7,A2QNU0,Q9C455	g14555.t1,g3826.t1,g1940.t1,g14120.t1,g1040.t1,g6989.t1,g12914.t1,g399.t1,g9269.t1,g6471.t1,g12066.t1,g15551.t1,g15379.t1,g1544.t1,g9243.t1,g2622.t1,g13356.t1,g3651.t1,g13350.t1
Carboxylesterase, type B	IPR002018_PF00135	Cluster_1	2	0	0	0	0	4	3	40	44	22	22	33	10	20	13	20	12	14	26	47	26	19	19	11	8	6	19.5		Q7RWP5,Q7RXK3,Q7S0I4,Q7SDR2,Q7S4M5,Q7S844,Q7S3T7,Q7RZS2,Q7SH50,Q872U5	A2QK84,A2QTI9,A2QZX4,A2R6H5,A2QH76,A2R496,A2R502,A2QI32,A2QLA0,A2QS46,A2QX92,A2QZR0,A5ABE5,A5ABH9,A2QN56,A2R0P4,A2R5R4,A2QE77,A2QG33,A2QST4,A2QV27,A2R2I5,A5ABE8,A2QF54,A2QHE9,A2QYF0,A2QYS7,A2QZ72,A2R1N7,A2R1R5,A2R273,A2R8Z3,A2QBH3,A2QFE9,A2QHE2,A2QL89,A2QL90,A2QS22,A2QTZ0,A2QUC1,A2QZN6,A5ABK1,A2QMK5,A2R8R3	g1104.t1,g2926.t1,g10195.t1,g10299.t1,g12426.t1,g15230.t1,g15836.t1,g50.t1,g12669.t1,g13086.t1,g3009.t1,g5760.t1,g668.t1,g9148.t1,g15229.t1,g4385.t1,g5411.t1,g7619.t1,g2150.t1
Protein kinase domain	IPR000719_PF00069	Cluster_2	48	20	20	20	22	20	19	20	22	21	23	20	18	18	20	19	21	17	20	22	18	18	18	22	21	18	18.5	P23293,P43568,P00546,P15790,P19454,Q03957,P16892,P32485,P32581,P06242,P36005,P32350,Q12222,P14681,P21965,P38615,P50873,P17157,Q00772,P41808,P39073,P14680	Q871M9,Q8TG13,Q96TL5,Q7RZY1,Q7RVR1,Q7RZ48,Q7RVB3,Q7RVR4,Q7SBT7,Q7RYY8,Q7SB13,Q86ZH1,Q870X4,Q8X0V5,Q9C1E0,Q9HE58,Q9HE92,Q9P3B4	A2QRF6,A2QN07,A2QSG8,A2QUE5,A2QVX4,A2R2K4,A2R4E8,A2RB29,A2QU77,A2R7R5,A2QRN7,A2R9R4,A2QUR6,A2Q8T0,A2Q9Y3,A2R817,A2QC16,A2QGY8,A2QVY8,A2R160,A2QA47,A2R8Q7	g2727.t1,g13638.t1,g1599.t1,g5602.t1,g13541.t1,g11380.t1,g13762.t1,g8577.t1,g13143.t1,g12529.t1,g6098.t1,g4035.t1,g11193.t1,g6829.t1,g1228.t1,g10862.t1,g10062.t1,g13765.t1
AMP-dependent synthetase/ligase	IPR000873_PF00501	Cluster_1	1	1	1	1	1	1	12	28	31	20	22	20	4	21	13	20	27	35	24	16	14	9	8	3	6	2	18	P07702	Q7S6D3,Q7RY33,Q872S0,Q9P3Q7	A2QLH9,A2QT24,A2R037,A2QCX5,A2QFT0,A2QH90,A2R9X2,A5ABE0,A2QAJ8,A2QH58,A2QJ10,A2QJ93,A5ABG0,A2QIQ8,A2QKQ9,A2QYX4,A2R6N2,A2QTD4,A2QGJ5,A2QWU2,A2R200,A2R3M8,A2R6H0,A2QHV2,A2QQF1,A2QQV0,A2R2T7,A2R6D2,A2QBI9,A2QDU0,A2R8D2	g659.t1,g8056.t1,g10572.t1,g6596.t1,g12932.t1,g4467.t1,g1502.t1,g5523.t1
Transcription factor domain, fungi	IPR007219_PF04082	Cluster_2	0	0	0	0	0	3	11	23	29	20	20	13	9	11	20	27	14	19	24	42	17	15	12	1	3	2	18		Q7S052,Q7RY04,Q7SDJ7,Q7SHK8,Q7RXD3,Q7RZ83,Q7S2B2,Q870W2,Q870W4	A2QHG2,A2QUW2,A2R452,A2QHA9,A2QTR9,A2R8D8,A2QMD2,A2QV50,A2R6W2,A5AB69,A2QA36,A2QKM6,A2QKW0,A2QR42,A2RAP9,A2QT30,A2Q7D4,A2QX26,A2R5K1,A2QT54,A2QVU3,A2R3E4,A2R4Y9,A2R6P6,A5AAB1,A2QPF1,A2QYZ8,A2R791,A2R8K4	g7532.t1,g9702.t1,g12427.t1,g6314.t1,g805.t1,g3611.t1,g11542.t1,g4766.t1,g11406.t1,g11779.t1,g7035.t1,g4401.t1
Acyl transferase	IPR014043_PF00698	Cluster_1	1	1	1	1	0	1	8	32	45	28	25	24	8	29	16	22	19	31	16	14	44	10	7	0	3	2	17.5		Q7SC21,Q7S0T8,Q7S0Q5,Q7S380,Q7RWC7,Q7SHI6,Q7S736,Q870P4	A2QH06,A2QIQ4,A2QT95,A2QW90,A2QWP8,A2QHC4,A2R1U2,A2R9X2,A2QG45,A2QK66,A2QTH2,A2R022,A2R5P7,A5ABG0,A2Q979,A2QYV7,A2QTE9,A2QWL0,A2QXP7,A2QYQ2,A2QYW3,A2R1Z2,A5AC09,A2QE52,A2QH36,A2QHI9,A2QM70,A2QTF6,A2QWU2,A2QX22,A2R3M8,A2Q977,A2QBL3,A2QKB6,A2QQV0,A2QUE2,A2QUI2,A2QW54,A2R2T7,A2R4Z4,A2Q7L3,A2QDU0,A2QUW6,A2QWP6,A2R6H1	g1812.t1,g3407.t1,g3969.t1,g8206.t1,g13622.t1,g14542.t1,g15719.t1
Zn(2)-C6 fungal-type DNA-binding domain	IPR001138_PF00172	Cluster_1	0	9	10	3	3	7	3	11	29	22	32	10	6	13	15	29	12	14	31	57	26	20	26	0	4	1	17.5	Q05958,P40971,Q12151	Q7RV02,Q7RY88,Q7SEI6,Q7S2G2,Q7SCN4,Q96TZ3	A2QC53,A2QW63,A2R1Q3,A2QE84,A2R497,A2R542,A2R5P8,A2QF49,A2QMD3,A2QT22,A2QYS8,A2QAI3,A2QC89,A2QXG8,A2R2Y7,A2R6A7,A2Q7H1,A2QDL7,A2R5X0,A2QB86,A2QUA8,A2QYT3,A2R5I2,A2R6B7,A2RA02,A2R8P5,A2QDQ7,A2QH96,A2QZQ9	g14120.t1,g2519.t1,g3147.t1,g10309.t1,g14031.t1,g16189.t1,g1105.t1,g2816.t1,g12928.t1,g2060.t1,g5302.t1,g7734.t1,g12888.t1,g13097.t1,g1534.t1,g3026.t1,g466.t1,g4739.t1,g14171.t1,g1173.t1,g5404.t1,g745.t1,g15753.t1,g4836.t1,g7521.t1,g7897.t1
Ankyrin repeat	IPR002110_PF00023	Cluster_1	7	0	0	2	0	0	9	31	27	17	34	14	3	13	11	34	22	24	17	22	18	12	17	1	0	1	17.5		Q7SAE7,Q7S064,Q7S8L8	A2QL59,A2QSL8,A2QSU1,A2QWQ4,A2QYW7,A2QZV5,A2QX66,A2QE53,A2QN97,A2QWL9,A2RAC1,A5AAG3,A2QJN7,A2QWQ7,A2Q9P9,A2QGG2,A2QLF0,A2QM57,A2QV38,A2R6B0,A2QAR6,A2QS32,A2QYD5,A2R3Q1,A2QLQ9,A2QWG9,A2QZP4	g13665.t1,g9982.t1,g127.t1,g2999.t1,g3841.t1,g3858.t1,g8350.t1,g6562.t1,g12694.t1,g15593.t1,g6602.t1,g2779.t1,g4445.t1,g11183.t1,g10567.t1,g12078.t1,g6586.t1
Amino acid permease/ SLC12A domain	IPR004841_PF00324	Cluster_1	10	24	25	14	18	16	15	28	21	26	29	16	9	17	16	17	17	17	25	46	19	13	19	7	8	12	17	P25376,P38090,P43548,P38971,P38084,P41815,P04817,P53388,P19145,P48813,P06775,P32487,Q12372,P15380,Q08986,Q03770,P38967,P38085	Q7S5L3,Q7RYD9,Q7S9D4,Q7SE11,Q7SES5,Q7S8G5,Q7S6C3,Q7RZ39,Q8X0I5	A2QWR6,A2R697,A2QCD8,A2QG22,A2QK51,A2QCR1,A2QHN9,A2QRZ9,A2QVG0,A2R9T4,A2QT12,A2QZA3,A2R1D6,A2QZ32,A2R0X1,A2R1Q2,A2R7P2,A2QK75,A2QKX2,A2QUT6,A2R261	g6028.t1,g4976.t1,g11775.t1,g15081.t1,g5034.t1,g14020.t1,g16120.t1,g5566.t1,g3148.t1,g933.t1,g14915.t1,g4566.t1,g11226.t1,g9804.t1,g11357.t1,g12651.t1,g5425.t1,g8485.t1,g10920.t1
Alcohol dehydrogenase, C-terminal	IPR013149_PF00107	Cluster_2	5	1	1	1	1	1	8	24	35	20	21	20	9	17	16	31	12	18	14	27	26	11	18	9	5	2	16.5	P38230	Q7S0R4,Q7S0T8,Q7S0Q5,Q7S380,Q7SAC7,Q7RWC7,Q7S994,Q7RZ31,Q871W3	A2Q7V0,A2QBC7,A2QH06,A2QT95,A2QWP8,A2R4B1,A2QHC4,A2QY67,A2R1U2,A2R9X2,A2QC27,A2QI91,A2R022,A2R5H3,A2R5P7,A2R6L3,A5ABG0,A2QV09,A2QYV7,A2QFL5,A2QWL0,A5AC09,A2QE52,A2QTF6,A2R886,A2Q977,A2QBL3,A2QKB6,A2QUE2,A2QW54,A2QXH2,A2Q7L3,A2QWP6,A2R8H5,A2RAW0	g10048.t1,g11225.t1,g13305.t1,g15273.t1,g6317.t1,g7220.t1,g10692.t1,g740.t1,g3969.t1,g8206.t1,g14542.t1,g15719.t1,g3497.t1,g5763.t1,g10538.t1,g11185.t1,g14594.t1,g12937.t1
General substrate transporter	IPR005828_PF00083	Cluster_4	0	5	1	1	3	2	3	17	14	19	18	18	5	15	12	19	10	11	27	70	18	30	25	0	4	0	16.5	P53048,P38156,P47186	Q7SBU8,Q7S7L9,Q7S5U3,Q7S871,Q7SHD8	A2QS19,A2R4G2,A5ABE7,A2QCA1,A2QG38,A2QLT8,A2QUY1,A2QLB6,A2QAJ2,A2R1V6,A2QLQ1,A2R6H4,A5AAZ9,A2R333	g725.t1,g6855.t1,g3812.t1,g4459.t1,g11685.t1,g13685.t1,g6703.t1,g1900.t1,g2510.t1,g8823.t1,g11061.t1,g16244.t1,g7283.t1,g65.t1,g7902.t1,g3625.t1,g7593.t1,g7057.t1,g2012.t1,g1243.t1,g15125.t1,g1283.t1,g3134.t1,g8237.t1,g6873.t1
Beta-ketoacyl synthase, C-terminal	IPR014031_PF02801	Cluster_1	1	0	0	0	1	0	7	29	44	29	24	21	7	28	13	20	17	29	15	13	41	10	6	0	3	0	16	P39525	Q7SC21,Q7S0T8,Q7S0Q5,Q7S380,Q7RWC7,Q7SHI6,Q7S736	A2QH06,A2QIQ4,A2QT95,A2QW90,A2QWP8,A2QHC4,A2R1U2,A2R9X2,A2QG45,A2QK66,A2QTH2,A2R022,A2R5P7,A5ABG0,A2Q979,A2QYV7,A2QTE9,A2QWL0,A2QXP7,A2QYQ2,A2QYW3,A2R1Z2,A5AC09,A2QE52,A2QH36,A2QM70,A2QTF6,A2QWU2,A2QX22,A2R3M8,A2Q977,A2QBL3,A2QKB6,A2QQV0,A2QUE2,A2QUI2,A2QW54,A2R2T7,A2R4Z4,A2Q7L3,A2QDU0,A2QUW6,A2QWP6,A2R6H1	g3407.t1,g3969.t1,g8206.t1,g13622.t1,g14542.t1,g15719.t1
Glycoside hydrolase, family 18, catalytic domain	IPR001223_PF00704	Cluster_1	8	1	2	1	1	1	11	14	11	17	7	15	8	11	11	15	10	16	16	23	17	16	9	7	2	17	15.5	Q06350	Q7S062,Q7S9A1,Q7SGW0,Q7RWD7,Q7S4F8,Q7S8L7,Q7SG57,Q7SGZ0	A2QIT7,A2QZL4,A2QF78,A2R4L6,A2RBJ5,A2Q8S2,A2QWN8,A5AA94,A5AB48,A2QVE9,A2R4D3	g11721.t1,g1308.t1,g15386.t1,g2740.t1,g3064.t1,g3659.t1,g12696.t1,g13170.t1,g13724.t1
Glucose-methanol-choline oxidoreductase, N-terminal	IPR000172_PF00732	Cluster_1	1	0	0	2	0	1	3	28	27	23	21	34	5	20	12	11	13	15	15	30	27	21	22	32	9	8	15		Q7S2V1,Q7S5S3,Q7S662,Q7S3S9,Q7SD15	A2QK04,A2R501,A2R5M3,A2R134,A2R339,A5ABY0,A2QFN1,A2QL33,A2QM15,A2QWL3,A2R1P5,A2R832,A2R9X3,A2QBC3,A2QS43,A2R0W2,A2R590,A2QEM1,A2R042,A2QIB9,A2QZ31,A2QZD3,A2R910,A2QBK8,A2QH57,A2QWL1,A2RB46	g2022.t1,g9161.t1,g9396.t1,g2435.t1,g3144.t1,g686.t1,g707.t1,g7458.t1,g7904.t1,g95.t1,g11006.t1,g13673.t1,g15829.t1,g5743.t1,g4328.t1,g13493.t1,g11041.t1,g6692.t1,g6277.t1,g3119.t1,g8441.t1,g9970.t1
Mitochondrial substrate/solute carrier	IPR018108_PF00153	Cluster_1	34	16	15	16	18	16	16	17	16	15	15	16	14	14	14	15	15	16	16	17	14	15	15	15	15	16	15	Q12482,Q12289,P40464,P10566,P23500,Q03028,Q99297,Q12375,P38921,P38127,P33303,Q07534,P39953,P53257,P40556,P32331,P38087,Q12251	Q01356,Q7S4X3,Q7S952,Q7S6J8,Q7SAV0,Q7S2H8,Q7S4D6,Q7SH90,Q7S597,Q871K0,Q871V0,Q96U08,Q9C2K1,Q9HE96	A2QGI0,A2QHV6,A2QMR7,A2QQ59,A2R2T2,A2QHH2,A2QSF6,A2RB57,A2QFX4,A2Q9F0,A2R5A0,A2QGZ4,A2QLM1,A2RAE3,A2QK17,A5ABV8	g14109.t1,g3309.t1,g1433.t1,g1198.t1,g1951.t1,g4634.t1,g6190.t1,g15042.t1,g4044.t1,g9273.t1,g12799.t1,g10323.t1,g6619.t1,g9708.t1,g10103.t1
Condensation domain	IPR001242_PF00668	Cluster_1	1	0	0	0	0	0	12	21	27	18	12	16	3	20	10	20	17	22	15	11	14	4	6	1	3	1	14.5		Q7S6D3,Q7RY33,Q872S0	A2QLH9,A2QT24,A2R037,A2QCX5,A2QFT0,A2QH90,A2R9X2,A5ABE0,A2QJ93,A5ABG0,A2QKQ9,A2QYW5,A2QYX4,A2QC51,A2QTD4,A2Q973,A2QGJ5,A2QWU2,A2R200,A2R6H0,A2QQF1,A2QQV0,A2R2T7,A2R6D2,A2QDU0,A2R8D2,A5AB67	g8056.t1,g10572.t1,g6596.t1,g12932.t1,g1502.t1,g5523.t1
Protein kinase domain	IPR000719_PF00069	Cluster_3	54	13	13	13	15	13	17	13	12	13	14	19	14	14	15	14	17	19	13	17	15	14	14	19	15	18	14.5	Q01389,P27636,P48562,P38692,P22209,P32490,P32491,P08018,Q12469,P08458,P25390,P53599,P23561,Q03497,P06784	P48479,Q7RZD3,Q7SC40,Q7S4G0,Q7SHS7,Q7RVY6,Q7RYZ6,Q7RYQ4,Q7SFV7,Q7SI64,Q871H9,Q876Z5,Q8NIV5,Q9HEL1	A2QD19,A2RAN1,A2QHV0,A2QQP5,A2QXY7,A2R9M9,A5AAH8,A2QAD3,A2R0C2,A2QW94,A2R1E1,A5AA76	g4599.t1,g9717.t1,g11910.t1,g5491.t1,g9252.t1,g1997.t1,g9143.t1,g11119.t1,g16232.t1,g8618.t1,g11579.t1,g555.t1,g6338.t1,g8392.t1
HAD-like domain	IPR023214_PF00702	Cluster_1	23	7	6	5	7	5	9	14	14	15	18	12	9	14	12	11	15	16	16	21	16	13	17	5	9	8	14.5	P13586,P38929,P13587,Q01896,Q12691,P05030,P19657	P07038,Q7RVS6,Q7S1D7,Q7S919,Q9UUX7,Q9UUX9,Q9UUY0,Q9UUY1,Q9UUY2	A2QEX1,A2R850,A2QT41,A2R2X5,A2QUK4,A2RBD0,A2Q8V1,A2QQN0,A2R4W4,A2QE56,A2QDA2,A2QFG4,A2QT61,A2RBM0	g488.t1,g5211.t1,g12401.t1,g2828.t1,g15882.t1,g11128.t1,g12588.t1,g15035.t1,g5890.t1,g6238.t1,g8325.t1,g27.t1,g5542.t1,g15481.t1,g6119.t1,g12865.t1,g7148.t1
ABC transporter-like	IPR003439_PF00005	Cluster_1	8	10	4	5	6	10	5	31	23	12	10	10	9	11	13	13	15	20	16	17	16	8	9	20	12	8	14	P14772,P36028,P32386,P39109,P38735,P53049	Q7SCP7,Q7SGQ7,Q7RVU0,Q7S9G5,Q7S940,Q7S0S1,Q7S770,Q7SF27,Q9C229	A2Q976,A2QGY9,A2QKR4,A2QN01,A2QQF3,A5AAB7,A2QA30,A2QGP8,A2R1T1,A2R5R6,A2QKW8,A2QR58,A2QGG4,A2QSX9,A2QTD5,A2QL42,A2QX68,A2QZA4,A2QGY0,A2QX64,A2R374,A2R6W3,A2R8D4	g392.t1,g5515.t1,g2652.t1,g8730.t1,g14546.t1,g8774.t1,g11411.t1,g15674.t1,g10134.t1
Zn(2)-C6 fungal-type DNA-binding domain	IPR001138_PF00172	Cluster_3	0	0	0	0	0	3	6	13	27	17	19	7	7	6	14	20	11	16	20	36	14	12	10	2	4	0	14		Q7S052,Q7RY04,Q7SDJ7,Q7SHK8,Q7RXD3,Q7RZ83,Q870W4	A2QHG2,A2QUW2,A2R452,A2QHA9,A2R8D8,A2QMD2,A2QV50,A5AB69,A2QA36,A2QKW0,A2QR42,A2R119,A2RAP9,A2QT30,A2Q7D4,A2QX26,A2R5K1,A2QT54,A2QVU3,A2R3E4,A2R4Y9,A2R6P6,A5AAB1,A2QPF1,A2R1C4,A2R791,A2R8K4	g7532.t1,g9702.t1,g12427.t1,g6314.t1,g805.t1,g11542.t1,g11406.t1,g11779.t1,g7035.t1,g4401.t1
Acyl carrier protein-like	IPR009081_PF00550	Cluster_1	0	0	0	0	0	0	7	24	31	23	20	14	6	18	11	14	16	28	13	12	31	8	7	0	2	0	13.5		Q7SC21,Q7S0T8,Q7S380,Q7RWC7,Q7SHI6,Q7S736	A2QH06,A2QIQ4,A2QW90,A2R9X2,A2QAM2,A2QG45,A2QK66,A2QTH2,A2R022,A2R5P7,A5ABG0,A2QM71,A2QTE9,A2QXP7,A2QYQ2,A2QYW3,A2QH36,A2QTF6,A2QWU2,A2QX22,A2R3M8,A2Q977,A2QBL3,A2QKB6,A2QQV0,A2QUI2,A2QW54,A2R4Z4,A2QDU0,A2QUW6,A2QWP6	g1181.t1,g3407.t1,g3969.t1,g8206.t1,g13622.t1,g14542.t1,g15719.t1
ABC transporter, transmembrane domain	IPR001140_PF00664	Cluster_1	7	10	3	5	6	10	5	14	23	12	9	8	9	10	13	13	16	20	16	17	14	8	8	14	11	8	13.5	P14772,P36028,P32386,P39109,P38735,P53049	Q7SCP7,Q7SGQ7,Q7RVU0,Q7S9G5,Q7S940,Q7S0S1,Q7S770,Q7SF27,Q9C229	A2Q976,A2QGY9,A2QKR4,A2QN01,A2QQF3,A5AAB7,A2QA30,A2QGP8,A2R5R6,A2QKW8,A2QR58,A2QGG4,A2QSX9,A2QTD5,A2QL42,A2QX68,A2QZA4,A2R1T2,A2QGY0,A2QX64,A2R374,A2R6W3,A2R8D4	g392.t1,g5515.t1,g2652.t1,g8730.t1,g14546.t1,g8774.t1,g11411.t1,g10134.t1
Helicase, C-terminal	IPR001650_PF00271	Cluster_2	20	13	13	14	13	15	15	15	14	15	14	18	14	13	13	15	14	14	13	15	13	13	13	15	12	20	13.5	P32657,P53115,P38144,Q08773,P32333,P40352,P32863,P38086,P22082,P32597,Q05471,P31380,P43610	Q872I5,Q7S133,Q7S7H0,Q7SD03,Q7RYI6,Q7S7G9,Q7RZ50,Q7RXH5,Q7SBC8,Q7SBI2,Q7S1Z7,Q7SAC4,Q7S159,Q7RVS3	A2R9H9,A2Q9U8,A2QP62,A2QQE1,A2QHT9,A2QY71,A2RAN4,A2Q9V0,A2QES1,A2R2K5,A2QAZ0,A2QRG3,A2QSF7,A2R9E2	g6038.t1,g509.t1,g4841.t1,g15471.t1,g9707.t1,g192.t1,g15299.t1,g7967.t1,g9866.t1,g5072.t1,g2261.t1,g9475.t1,g10113.t1
Zn(2)-C6 fungal-type DNA-binding domain	IPR001138_PF00172	Cluster_2	2	9	3	7	6	5	6	17	33	25	31	7	8	8	9	16	4	11	19	33	18	15	24	1	4	1	13	P39113,P04386,P07272,P46954,P38699,Q05854	P87000,Q7RXV3,Q7S8Q2,Q7S1R3,Q7S9N1,Q7S8Q1,Q7SAJ9,Q8WZK9	A2Q9J1,A2QDP8,A2QW43,A2QZ01,A2R6Y5,A2R8C4,A2QB02,A2QTM3,A2QYD4,A2QSI8,A2QWI6,A2R6I7,A2R844,A5ABH2,A2QF53,A2QXN4,A2R7L9,A2QAE9,A2QG39,A2QUN1,A2QRM7,A2QVD9,A2Q9J2,A2QB49,A2QLV5,A2QQB5,A2R2M4,A2R324,A5ABL4,A2Q999,A2QNU5,A2QW34,A2R132	g6696.t1,g2010.t1,g5545.t1,g8846.t1,g10187.t1,g13662.t1,g14037.t1,g5767.t1,g16104.t1,g4574.t1,g8191.t1,g15475.t1,g4502.t1,g7664.t1,g855.t1,g9633.t1,g11787.t1,g15379.t1,g8135.t1,g76.t1,g10599.t1,g281.t1,g857.t1,g6698.t1
Major facilitator superfamily	IPR011701_PF07690	Cluster_7	0	7	6	1	1	16	7	26	25	20	22	17	5	15	9	12	9	20	14	35	17	8	15	1	2	0	13	P53389	Q7S959,Q7SEF0,Q7S925,Q7SE92,Q870U9	A2Q8W8,A2QBP4,A2QL50,A2QS50,A2R0Y6,A2Q9Q3,A2QE11,A2QGW6,A2QH73,A2QIC4,A2QIN7,A2Q9A0,A2R1S3,A2RBD8,A2R8S3,A2Q9Q9,A2QFQ0,A2QSI0,A2QZE2,A2R3Z1,A2R6U7,A2QM06,A2QBB5,A2QF80,A5ABH3	g4990.t1,g7247.t1,g9840.t1,g1177.t1,g4541.t1,g12489.t1,g3604.t1,g7170.t1,g8187.t1,g11825.t1,g12092.t1,g6579.t1,g6593.t1,g5159.t1,g9343.t1
AMP-dependent synthetase/ligase	IPR000873_PF00501	Cluster_2	11	0	0	0	1	13	18	25	18	25	17	19	11	14	10	13	9	11	16	20	12	13	16	11	11	4	12.5	P38137	Q7RWW3,Q7S2S5,Q7S557,Q7S7F6,Q7SHX6,Q7S4Y7,Q7S7K3,Q7SDM6,Q7SDW1,Q7SG79,Q7SI43	A2QYG7,A2R463,A2QND1,A2QTE5,A2QXP6,A2RAN7,A2Q968,A2QLX4,A2R3V6,A2QIQ3,A2QYW5,A2R7U9,A5AAI8,A2QRV7,A2QYT6,A2QK86,A2QLI1,A2QRH8	g16160.t1,g1473.t1,g11234.t1,g15121.t1,g1154.t1,g16123.t1,g2281.t1,g1500.t1,g8474.t1,g4617.t1,g12565.t1,g13361.t1,g14204.t1,g14537.t1,g16240.t1,g8860.t1
Major facilitator superfamily	IPR011701_PF07690	Cluster_6	8	8	5	4	3	6	4	30	26	18	28	10	2	9	11	18	10	14	20	42	18	11	18	7	4	0	12.5	P15365,Q07904,Q12235	Q7S269,Q7SH75	A2QG72,A2QPA5,A2QH17,A2QQ53,A2R1Q8,A2R336,A2R4W0,A2RBK3,A2QYP3,A2R6N7,A2QXG5,A2QZW8,A2R264,A2Q7N4,A2QBH2,A2QZ41,A2R0S4,A2QFM4,A2QWP5,A2R3A0,A2R5H6,A2RA40,A2RB59,A2QAI1,A2QIA5,A2QMV7	g7495.t1,g1117.t1,g1143.t1,g796.t1,g8028.t1,g8463.t1,g10354.t1,g13437.t1,g15886.t1,g6302.t1,g11049.t1,g4581.t1,g13363.t1,g13971.t1,g3357.t1,g10360.t1,g12222.t1,g2418.t1
ABC transporter-like	IPR003439_PF00005	Cluster_3	9	4	5	6	4	6	10	19	10	11	15	15	8	20	12	12	12	13	16	22	18	12	13	12	8	4	12.5	P40416,P33310,P33311,P12866	Q7RX59,Q7RVV4,Q7S1X2,Q7SGU1,Q7S0L1,Q7S2E6,Q7RY95,Q872R8	A2QIJ0,A5AAV0,A2QYZ9,A2QJH1,A2QJU9,A2R9K7,A2QGK5,A2QRA7,A2QRB6,A2QSG1	g5720.t1,g704.t1,g13480.t1,g2062.t1,g5569.t1,g9007.t1,g7581.t1,g14125.t1,g1905.t1,g5111.t1,g16029.t1,g6318.t1,g10709.t1
ABC transporter, transmembrane domain	IPR001140_PF00664	Cluster_2	8	4	4	6	4	6	10	19	10	11	16	14	7	18	12	12	11	13	16	22	16	11	12	6	8	3	12.5	P40416,P33310,P33311,P12866	Q7RX59,Q7S1X2,Q7SGU1,Q7S0L1,Q7S2E6,Q7RY95,Q872R8	A2QIJ0,A5AAV0,A2QYZ9,A2QJH1,A2QJU9,A2R9K7,A2QGK5,A2QRA7,A2QRB6,A2QSG1	g5720.t1,g13480.t1,g2062.t1,g5569.t1,g9007.t1,g7581.t1,g14125.t1,g1905.t1,g5111.t1,g16029.t1,g6318.t1,g10709.t1
Cation-transporting P-type ATPase, C-terminal	IPR006068_PF00689	Cluster_1	13	5	5	3	5	4	8	11	9	10	15	9	7	11	9	8	13	15	13	19	13	12	15	4	7	4	12.5	P13586,P38929,P13587,Q01896,Q12691	Q7RVS6,Q7S919,Q9UUX7,Q9UUX9,Q9UUY0,Q9UUY1,Q9UUY2	A2QT41,A2R2X5,A2RBD0,A2QQN0,A2R4W4,A2QDA2,A2QFG4,A2QT61,A2RBM0	g488.t1,g5211.t1,g12401.t1,g2828.t1,g15882.t1,g11128.t1,g12588.t1,g15035.t1,g5890.t1,g8325.t1,g27.t1,g15480.t1,g6119.t1,g12865.t1,g7148.t1
P-type ATPase, A domain	IPR008250_PF00122	Cluster_1	14	5	6	3	5	4	8	11	9	11	13	9	7	11	9	8	13	15	13	18	13	12	14	4	6	5	12.5	P13586,P38929,P13587,Q01896,Q12691	Q7RVS6,Q7S919,Q9UUX7,Q9UUX9,Q9UUY0,Q9UUY1,Q9UUY2	A2QT41,A2R2X5,A2RBD0,A2QQN0,A2R4W4,A2QDA2,A2QFG4,A2QT61,A2RBM0	g488.t1,g5211.t1,g12401.t1,g2828.t1,g15882.t1,g11128.t1,g12588.t1,g15035.t1,g5890.t1,g8325.t1,g27.t1,g6119.t1,g12865.t1,g7148.t1
Glucose-methanol-choline oxidoreductase, C-terminal	IPR007867_PF05199	Cluster_1	1	0	0	2	0	1	2	26	25	20	17	27	3	13	12	11	10	12	11	23	25	16	18	33	9	8	12		Q7S5S3,Q7S662,Q7SD15	A2QK04,A2R501,A2R5M3,A2R339,A5ABY0,A2QFN1,A2QL33,A2QM15,A2QWL3,A2R1P5,A2R9X3,A2QBC3,A2QS43,A2R0W2,A2R590,A2QEM1,A2R042,A2QIB9,A2QZ31,A2QZD3,A2R910,A2QBK8,A2QH57,A2QWL1,A2RB46	g2022.t1,g9161.t1,g9396.t1,g2435.t1,g686.t1,g7458.t1,g7904.t1,g95.t1,g11006.t1,g15829.t1,g5743.t1,g4328.t1,g13493.t1,g11041.t1,g6692.t1,g6277.t1,g3119.t1,g8441.t1
Alcohol dehydrogenase GroES-like	IPR013154_PF08240	Cluster_3	1	3	5	3	0	7	3	20	27	10	9	10	4	12	9	20	7	12	11	20	14	13	13	16	4	0	12		Q7S492,Q7RWP0,Q7S3S7,Q872V8	A2QM86,A2QYU3,A2QKA4,A2QWU0,A2QZV3,A2QLQ6,A2R148,A2R543,A2R9A1,A2QGX9,A2QT49,A2QW89,A2R8G1,A2QXC4,A2QWP3,A2QWS3,A2R1Z0,A2R2U0,A2R3U8,A2QDU2,A2QIR8,A2QQU5,A2QQV3,A2QTF1,A2QZB6,A2R9U4,A2R6Y4	g9110.t1,g8488.t1,g13980.t1,g13983.t1,g6162.t1,g10538.t1,g7134.t1,g11359.t1,g3152.t1,g3647.t1,g7241.t1,g11847.t1,g14545.t1
Amino acid/polyamine transporter I	IPR002293_PF13520	Cluster_2	9	7	10	2	3	9	15	38	32	21	29	22	4	6	11	11	17	18	22	35	9	12	8	10	6	8	11.5	P53744,P19807,P32837	O59942,Q7S5R7,Q7SI04,Q7RZ19	A2QDU5,A2R1N5,A2R305,A5ABY3,A2QA04,A2QPY5,A2QTV0,A2R2T1,A2R7F1,A2R7Z7,A2R8P6,A2QR65,A2Q7U1,A2QAZ1,A2QBJ2,A2QD58,A2QFR1,A2QGZ8,A2R873,A2QKU6,A2QUB1,A2Q863,A2QE63,A2QFP1,A2QTL7,A2R713,A2R9I4,A2R721,A2QJG2,A2R0W1,A2R4X1,A2R6U1	g3640.t1,g11753.t1,g15891.t1,g11741.t1,g7162.t1,g172.t1,g8158.t1,g6291.t1
Acyl carrier protein-like	IPR009081_PF00550	Cluster_2	1	1	1	1	1	1	12	25	27	17	17	15	4	11	10	21	19	23	16	12	9	6	6	2	5	1	11.5	P07702	Q7S6D3,Q7RY33,Q872S0,Q9P3Q7	A2QLH9,A2QT24,A2R037,A2QCX5,A2QFT0,A2QH90,A5ABE0,A2QAJ8,A2QH58,A2QJ10,A2QJ93,A2QIQ8,A2QKQ9,A2QYX4,A2R6N2,A2QTD4,A2Q973,A2QGJ5,A2R200,A2R6H0,A2QHV2,A2QQF0,A2QQF1,A2R6D2,A2QBI9,A2R8D2,A5AB67	g659.t1,g8056.t1,g10572.t1,g12932.t1,g1502.t1,g5523.t1
ABC transporter-like	IPR003439_PF00005	Cluster_2	10	9	10	7	10	6	8	22	20	16	19	12	7	7	10	10	12	11	19	25	14	16	17	9	8	6	11.5	P25371,Q08409,P51533,P40550,Q02785,Q04182,P33302,P32568,P53756,Q08234	Q7S0X8,Q7RZS4,Q7S0J7,Q7SHS0,Q7S1R2,Q7S6X2,Q7SGM7	A2Q9Q5,A2QVP0,A2QKW5,A2QCV9,A2QT53,A2R3A2,A2QZP3,A2R4P4,A2QGB1,A2QPE5,A2QR22,A2R573,A2QLV3,A2QM91,A2QQQ1,A2R307,A2Q8C9,A2QAQ5,A2R253,A2R202	g10356.t1,g7629.t1,g928.t1,g12430.t1,g12900.t1,g13193.t1,g13603.t1,g15283.t1,g2594.t1,g14012.t1,g14954.t1,g655.t1,g12942.t1,g5803.t1,g7751.t1,g1360.t1,g3035.t1
ABC-2 type transporter	IPR013525_PF01061	Cluster_1	10	9	12	7	10	6	8	22	21	17	19	10	7	8	10	10	12	11	19	26	14	15	18	10	8	6	11.5	P25371,Q08409,P51533,P40550,Q02785,Q04182,P33302,P32568,P53756,Q08234	Q7S0X8,Q7RZS4,Q7S0J7,Q7SHS0,Q7S1R2,Q7S6X2,Q7SGM7	A2Q9Q5,A2QVP0,A2QKW5,A2QCV9,A2QT53,A2R3A2,A2QZP3,A2R4P4,A2QGB1,A2QPE5,A2QR22,A2R573,A2QLV3,A2QM91,A2QQQ1,A2R307,A2Q8C9,A2QAQ5,A2R253,A2R0T9,A2R202	g10356.t1,g7629.t1,g928.t1,g12430.t1,g12900.t1,g13193.t1,g13603.t1,g15283.t1,g16046.t1,g2594.t1,g14012.t1,g14954.t1,g655.t1,g12942.t1,g5803.t1,g7751.t1,g1360.t1,g3035.t1
Alcohol dehydrogenase GroES-like	IPR013154_PF08240	Cluster_1	11	9	6	5	6	5	5	19	18	15	16	17	5	8	12	21	9	8	15	32	11	14	13	10	6	2	11.5	P00330,P00331,P07246,P38113,Q04894,P25377	Q9P6C8,Q7S6L2,Q7RZV3,Q7SC51,Q7SG88	A2Q7Q7,A2QCA7,A2R2W2,A2QBA8,A2QW33,A2QW77,A2R0V6,A2QHC9,A2R9I3,A5ABB8,A2QAN5,A2QFZ8,A2R229,A2R6L2,A2QYB6,A2R0U3,A2R772,Q58FL9	g1269.t1,g2.t1,g3922.t1,g3954.t1,g10279.t1,g11284.t1,g12410.t1,g13916.t1,g4093.t1,g8473.t1,g4538.t1,g9850.t1,g5533.t1
Polyketide synthase, KR	IPR013968_PF08659	Cluster_1	0	0	0	0	0	0	7	14	34	14	17	16	6	24	9	13	7	19	10	12	30	5	5	0	0	0	11		Q7SC21,Q7S0T8,Q7S0Q5,Q7S380,Q7RWC7,Q7SHI6	A2Q7V0,A2QH06,A2QIQ4,A2QT95,A2QW90,A2QWP8,A2R951,A2QHC4,A2R1U2,A2R9X2,A2R022,A2R5P7,A5ABG0,A2Q979,A2QYV7,A2QWL0,A2QXP7,A2QYW3,A5AC09,A2QE52,A2QTF6,A2QWU2,A2Q977,A2QBL3,A2QKB6,A2QQV0,A2QUE2,A2QW54,A2R2T7,A2R4Z4,A2Q7L3,A2QDU0,A2QWP6,A2R6H1	g3407.t1,g3969.t1,g8206.t1,g14542.t1,g15719.t1
Oligopeptide transporter, OPT superfamily	IPR004813_PF03169	Cluster_1	6	9	9	2	2	17	2	7	11	5	7	3	8	10	10	12	15	14	9	15	13	6	3	16	5	26	11	P40897,Q06593	Q7S189,Q7S882,Q7RW19,Q7S4I2,Q7S4Q8,Q7S9V4,Q7SC23,Q7SEW1	A2QEH8,A2QWJ0,A2QX69,A2R1M5,A2QEJ7,A2QT38,A2R6C5,A2QVD7,A2QW30,A2R3S2,A2R6Q2	g14480.t1,g6408.t1,g4117.t1
Beta-ketoacyl synthase, N-terminal	IPR014030_PF00109	Cluster_1	0	0	0	0	0	0	5	16	34	14	17	12	6	22	9	13	7	19	10	11	30	7	5	0	0	0	10.5		Q7SC21,Q7S0T8,Q7S0Q5,Q7S380,Q7RWC7,Q7SHI6	A2QH06,A2QIQ4,A2QT95,A2QW90,A2QWP8,A2QHC4,A2R1U2,A2R9X2,A2R022,A2R5P7,A5ABG0,A2Q979,A2QYV7,A2QWL0,A2QXP7,A2QYW3,A2R1Z2,A5AC09,A2QE52,A2QM70,A2QTF6,A2QWU2,A2Q977,A2QBL3,A2QKB6,A2QQV0,A2QUE2,A2QW54,A2R2T7,A2R4Z4,A2Q7L3,A2QDU0,A2QWP6,A2R6H1	g3407.t1,g3969.t1,g8206.t1,g14542.t1,g15719.t1
General substrate transporter	IPR005828_PF00083	Cluster_5	1	11	0	1	0	0	1	10	7	14	12	13	5	13	6	8	7	5	23	43	17	21	25	5	0	0	10.5		Q7S555,Q7SEC5,Q7SD12,Q7SCU1,Q871C4	A2QIA1,A5AB80,A2R2Q7,A2R884,A2QH24,A2R0P0,A2R221	g15292.t1,g3999.t1,g8194.t1,g9409.t1,g9793.t1,g15534.t1,g1300.t1,g11726.t1,g2472.t1,g3621.t1,g3892.t1,g3917.t1,g62.t1,g7234.t1,g7883.t1,g9349.t1,g10525.t1,g11619.t1,g13440.t1,g6946.t1,g1894.t1,g6922.t1,g10924.t1,g11000.t1,g136.t1
Nucleoside phosphorylase domain	IPR000845_PF01048	Cluster_1	0	0	0	0	0	0	0	25	33	19	0	1	3	8	24	50	11	23	9	15	10	5	1	0	0	0	10.5		Q7SD42,Q7RX63,Q7S8L8	A2Q838,A2QGI1,A2QXG9,A2RBL3,A5AB88,A2Q7G6,A2QLR9,A2QSQ9,A2R6W5,A2QHA0,A2QSL7,A2Q7P3,A2QKQ4,A2QSW7,A2R878,A2Q7J3,A2Q955,A2QG05,A2QR49,A2R5P3,A2R5U7,A2QLC6,A2QMU3,A2QZP1,A2R8C9,A2RA48,A2QV12,A2QW27,A2R9X4,A2QGG0,A2QKW2,A2QME9,A2R6U3	g7746.t1
Alcohol dehydrogenase GroES-like	IPR013154_PF08240	Cluster_4	3	1	1	1	1	1	8	16	22	4	14	11	5	13	7	13	6	13	5	12	17	7	4	6	3	1	9.5	P38230	Q7S0T8,Q7S0Q5,Q7SHI6,Q7RZ31,Q871W3	A2Q7V0,A2QH06,A2QT95,A2QWP8,A2QHC4,A2QY67,A2R1U2,A2R022,A2R6L3,A2QYV7,A2QFL5,A5AC09,A2QE52,A2Q977,A2QKB6,A2QUE2,A2QW54,A2QXH2,A2Q7L3,A2QWP6,A2R6H1,A2RAW0	g15719.t1,g3497.t1,g5763.t1,g11185.t1
Alcohol dehydrogenase GroES-like	IPR013154_PF08240	Cluster_2	5	5	4	2	5	1	6	20	21	17	21	14	6	8	6	9	9	11	14	25	11	10	17	9	5	6	9.5	P39714,P35497,Q07786,Q07993,P39713	Q7SI09,Q7RY77,Q7S9B3,Q7SHA1,Q7S1U8,Q7SFE0	A2QL21,A2QUN8,A2QBG7,A2QM95,A2QU04,A2R6Z1,A2QUX4,A2R6Z2,A2QUV3,A2R396,A2R610,A2Q889,A2QH11,A2R288,A5AB83,A2QKZ5,A2QNV6,A2QS17,A2R5K3,Q5GN51,Q5GN52	g7887.t1,g89.t1,g11240.t1,g12441.t1,g14368.t1,g3816.t1,g9638.t1,g4515.t1,g16210.t1,g16132.t1,g7804.t1,g981.t1,g10757.t1,g14494.t1,g2843.t1,g7590.t1,g12940.t1
Helicase, C-terminal	IPR001650_PF00271	Cluster_3	9	4	7	7	7	7	8	10	8	9	9	9	8	10	8	9	9	9	9	7	9	9	9	11	10	11	9	Q04217,P36009,P15938,P24384,P20095,P53131,Q06698	Q7SGC1,Q7SAB3,Q7S5P1,Q7SF56,Q871L2,Q872Z9,Q9HED9,Q9P5Z6	A2RAH0,A2R4P8,A2QKI0,A2QPZ8,A2R634,A2QZH2,A2R3C2,A2RAP7	g4393.t1,g4221.t1,g6730.t1,g13098.t1,g8149.t1,g5637.t1,g9216.t1,g4683.t1,g5891.t1
Zn(2)-C6 fungal-type DNA-binding domain	IPR001138_PF00172	Cluster_4	1	0	2	0	2	0	0	5	14	6	8	6	6	3	7	10	8	6	10	18	12	11	9	2	4	1	9	P43634,P47988	O13360,P28349,Q7SGN4,Q7S3A5,Q7SFX4,Q7S808	A2QYQ6,A2QG60,A2R9S8,A2QVW5,A2R1T9,A2QAC6,A2QH80,A2QNH0,A2QYD3,A2R6L5,A2R6T2,A2RA91,A2R0S2,A2R2L8	g12021.t1,g792.t1,g12556.t1,g14638.t1,g6911.t1,g11242.t1,g9130.t1,g8739.t1,g7135.t1
Methyltransferase type 12	IPR013217_PF08242	Cluster_1	0	0	0	0	0	0	6	14	23	14	13	12	2	12	7	8	8	14	9	9	22	2	3	0	0	0	8.5		Q7S0T8,Q7S380	A2Q7V0,A2QH06,A2QIQ4,A2QT95,A2QWP8,A2QHC4,A2QTH2,A2QYV7,A2QTE9,A2QWL0,A2QXP7,A2QYQ2,A5AC09,A2QE52,A2QTF6,A2Q977,A2QBL3,A2QKB6,A2QQV0,A2QW54,A2R2T7,A2R4Z4,A2R6H1	g3969.t1,g14542.t1,g15719.t1
CDR ABC transporter	IPR010929_PF06422	Cluster_1	8	5	6	4	8	5	4	17	17	14	16	4	4	4	7	8	9	7	15	19	11	12	14	3	4	4	8.5	Q08409,P51533,P40550,Q02785,Q04182,P33302,P32568,P53756	Q7S0J7,Q7S1R2,Q7S6X2,Q7SGM7	A2Q9Q5,A2QVP0,A2QKW5,A2QT53,A2R3A2,A2R4P4,A2QGB1,A2QR22,A2R573,A2QLV3,A2QM91,A2QQQ1,A2R307,A2Q8C9,A2QAQ5,A2R253,A2R202	g10356.t1,g7629.t1,g928.t1,g12430.t1,g12900.t1,g13193.t1,g13603.t1,g15283.t1,g2594.t1,g655.t1,g12942.t1,g5803.t1,g7751.t1,g3035.t1
Transcription factor domain, fungi	IPR007219_PF04082	Cluster_4	1	1	0	1	0	1	6	11	9	11	14	5	2	3	9	11	6	8	13	23	4	10	12	1	1	1	8.5		Q7RV19,Q7SAP0	A2R2J1,A2QYC5,A2R749,A2QM44,A2QZX5,A2Q808,A2R903,A5AB93,A2R6W1	g8463.t1,g10440.t1,g12564.t1,g12648.t1,g14410.t1,g5058.t1,g4562.t1,g14363.t1,g15438.t1,g12413.t1,g15671.t1,g4014.t1
FAD linked oxidase, N-terminal	IPR006094_PF01565	Cluster_2	4	5	5	3	4	3	6	12	7	9	8	11	6	8	8	10	5	6	10	18	9	7	13	5	3	3	8	P54783,P32891,P46681,P39976	Q7SGY1,Q7SE05,Q7S6F1,Q7RYX6,Q7S4K5,Q7SCV2	A2QGI9,A2QZV2,A2QXM7,A2QTA3,A2QY53,A2QS26,A5AAH4	g2039.t1,g4534.t1,g2901.t1,g8189.t1,g9035.t1,g14595.t1,g5751.t1,g11625.t1,g7510.t1,g13121.t1,g7889.t1,g13818.t1,g10820.t1
Glycoside hydrolase, family 76	IPR005198_PF03663	Cluster_1	0	2	2	2	2	5	3	11	10	7	8	8	10	8	8	8	13	14	8	8	9	8	5	0	1	7	8	P36091,Q05031	Q7RUC1,Q7S863,Q7S4K4,Q7SGV4,Q7S3X3,Q7SAB2,Q7RYP1,Q96TX1,Q9C2J1,Q9HFJ0	A2R8R5,A2QFT8,A2Q936,A2QC87,A2QK78,A2QL91,A2QVF7,A2QZR8,A2R397,A5AAX1	g2403.t1,g3566.t1,g6105.t1,g8168.t1,g15585.t1
Chaperonin Cpn60/TCP-1	IPR002423_PF00118	Cluster_1	14	8	8	8	8	8	8	7	8	8	9	8	8	8	8	8	8	8	8	8	8	8	8	8	8	9	8	P12612,P39076,P39078,P40413,P39077,P42943,P47079,P39079	Q7RXK1,Q7RXM7,Q7S1Y6,Q7S2R7,Q7S2S6,Q7S465,Q7RWB8,Q7RV38	A2QE06,A2RB76,A2R7D0,A2QEZ5,A2Q934,A2QJJ9,A2QVR3,A2R622	g14121.t1,g3189.t1,g10458.t1,g14801.t1,g2373.t1,g10124.t1,g14810.t1,g3109.t1
Phosphoesterase domain	IPR004843_PF00149	Cluster_1	21	9	10	8	12	10	8	8	10	8	8	8	8	8	8	8	8	7	8	8	8	8	8	9	8	7	8	P20604,P32598,P23594,P23595,P32838,P23287,P14747,P32345,P32945,P53043,P26570,P33329	Q9UW86,P48580,Q05681,Q7RW12,Q7RVY0,O14428,Q9C1L7,Q9P3I1	A2Q8F1,A2RA93,A2RAW6,A2QYY8,A5ABH7,A2QP89,A2R9C6,A2QAK2,A2QMX2,A2QYY7	g3288.t1,g6799.t1,g9334.t1,g6544.t1,g14793.t1,g3239.t1,g7792.t1,g9015.t1
Zn(2)-C6 fungal-type DNA-binding domain	IPR001138_PF00172	Cluster_6	0	1	1	1	0	0	2	4	12	5	13	9	1	1	9	13	4	7	9	20	9	3	5	0	0	0	8		Q7S117	A2R6R9,A2QIM9,A2QQ69,A2R1Z9,A2QWC9,A2QF40,A2R6S4,A2QKT6,A2Q882,A2QB62,A2QZM7,A2QKQ8	g4934.t1,g2021.t1,g9348.t1,g12635.t1,g11644.t1
Peptidase S8/S53 domain	IPR000209_PF00082	Cluster_2	9	0	0	2	0	0	1	0	0	0	0	2	1	16	5	8	8	12	3	8	8	10	1	2	1	10	8		Q7RZV0		g4081.t1
Alcohol dehydrogenase, C-terminal	IPR013149_PF00107	Cluster_3	1	2	5	3	3	5	2	19	23	8	7	8	2	6	5	12	4	6	11	23	11	9	12	15	2	0	7.5	P25608,P54007,P53912	Q7RWP0,Q872V8	A2QM86,A2QT73,A2QYU3,A2QKA4,A2QWU0,A2QZV3,A2QLQ6,A2R8B4,A2R9A1,A2QGX9,A2QW89,A2R8G1,A2QXC4,A2R1Z0,A2R2U0,A2R3U8,A2QDU2,A2QIR8,A2QQU5,A2QQV3,A2QTF1,A2R9U4,A2R6Y4	g9110.t1,g8488.t1,g11292.t1,g13980.t1,g14048.t1,g6162.t1,g11359.t1,g3152.t1,g3647.t1,g7241.t1,g11847.t1,g14545.t1
Major facilitator superfamily	IPR011701_PF07690	Cluster_11	0	3	2	1	3	2	6	12	11	8	7	7	4	8	9	15	5	7	8	16	6	5	8	6	2	3	7.5	P13090,Q03263,Q08902	Q7S6U7,Q7SB78,Q7S343,Q7RZ56	A2QTQ3,A2R9V8,A2QB98,A2QS40,A2QV22,A2QBG1,A5AB17,A2Q7T8,A2Q978,A2Q9N8,A2QEE9	g847.t1,g2569.t1,g13070.t1,g13918.t1,g12930.t1,g6600.t1,g2588.t1,g9645.t1
Helicase, C-terminal	IPR001650_PF00271	Cluster_4	3	3	3	3	3	3	5	10	9	6	8	9	7	9	10	8	5	6	7	14	10	7	6	3	4	7	7.5	P31244,P32849,Q08562	Q7S1P9,Q7RZ29,Q7SI21,Q7S6P9,Q7S8T9,Q7SAR3,Q9HE48	A2QWZ3,A2QB33,A2QHB0,A2QSB2,A2QC42,A2R3B8,A2R9E3,A2QTI7,A2R176	g1417.t1,g9520.t1,g10659.t1,g14581.t1,g6971.t1,g15204.t1
Glycoside hydrolase, family 3, N-terminal	IPR001764_PF00933	Cluster_1	5	1	1	0	0	4	3	10	9	8	7	8	5	11	6	7	4	4	8	8	8	8	8	2	3	2	7.5		Q7S3R5,Q7RWP2,Q7SGM9,Q7S6Y6,Q9C2C4	A2QPK4,A2QWR0,A5AAW4,A2RAL4,A2QS42,A2R4X0,A2R5M1,A2R2S3,A5ABF5	g5554.t1,g7159.t1,g10416.t1,g9392.t1,g2528.t1,g5574.t1,g7898.t1,g14099.t1
Glycoside hydrolase family 3 C-terminal domain	IPR002772_PF01915	Cluster_1	5	1	1	0	0	4	3	10	9	8	7	8	5	10	6	7	4	4	8	8	8	8	8	2	3	2	7.5		Q7S3R5,Q7RWP2,Q7SGM9,Q7S6Y6,Q9C2C4	A2QPK4,A5AAW4,A2RAL4,A2QS42,A2QWQ9,A2R4X0,A2R5M1,A2R2S3,A5ABF5	g5554.t1,g7159.t1,g10416.t1,g9392.t1,g2528.t1,g5574.t1,g7898.t1,g14099.t1
ATPase, AAA-type, core	IPR003959_PF00004	Cluster_2	0	0	0	0	0	0	3	4	7	5	9	14	4	7	10	12	4	5	8	18	9	4	5	4	0	0	7.5		Q7SFI0,Q7S328,Q7S545,Q7SFX3	A2QN57,A2QW49,A2QW59,A2QX09,A2Q7X2,A2QMH8,A2R2T3	g3947.t1,g11673.t1,g7267.t1,g10077.t1,g949.t1
Transcription factor domain, fungi	IPR007219_PF04082	Cluster_3	12	1	4	0	2	0	4	10	14	11	9	6	4	4	5	9	6	5	11	19	10	8	15	3	4	1	7	P43634,P47988	P28349,Q7S4Y2,Q7S3A5,Q7SFX4	A2QK89,A2QYQ6,A2R033,A2QD84,A2QG60,A2R9S8,A2QVW5,A2QAC6,A2QYD3,A2R123,A2R6L5,A2R6T2,A2RA91,A2R2L8	g12021.t1,g3054.t1,g792.t1,g8989.t1,g12244.t1,g12556.t1,g14638.t1,g16016.t1,g6911.t1,g982.t1,g11242.t1,g7856.t1,g9130.t1,g8739.t1,g7135.t1
AMP-binding enzyme C-terminal domain	IPR025110_PF13193	Cluster_2	1	1	1	1	1	1	8	14	16	14	11	11	2	7	5	10	9	11	13	7	5	4	5	3	5	1	7	P07702	Q7S6D3,Q9P3Q7	A2QLH9,A2R037,A2QFT0,A5ABE0,A2QH58,A2QJ10,A2QJ93,A2QIQ8,A2QKQ9,A2R200,A2R3M8,A2R6H0,A2QHV2,A2QQF1,A2R6D2,A2R8D2	g659.t1,g8056.t1,g12932.t1,g4467.t1,g5523.t1
Major facilitator superfamily	IPR011701_PF07690	Cluster_10	8	5	4	2	5	4	4	10	9	10	10	6	6	7	5	9	9	5	7	10	16	5	4	5	1	0	7	P53943,P38125,P38227,P40475,P40474	Q7S9Y0,Q7S080,Q7S238,Q7S9C6,Q7SFF6,Q871V6	A2QYZ1,A2QSZ2,A2R9K1,A2Q7P8,A2RBM7,A2QB97,A5AB70,A2QK87,A2QDM0	g2580.t1,g15865.t1,g11165.t1,g10359.t1
FMN-dependent dehydrogenase	IPR000262_PF01070	Cluster_1	2	2	1	1	1	2	3	16	10	10	11	8	4	6	6	8	5	6	10	24	9	9	10	7	3	1	7	P00175	Q7S8J5,Q7RWG9,Q7S0C1,Q7S825	A2QIA6,A2QBA3,A5AAJ7,A2Q7T6,A2R2X1,A2QZX1,A2QJX1,A2QW16,A2R0D9,A2R0X2	g8799.t1,g13332.t1,g419.t1,g10164.t1,g5408.t1,g10080.t1,g14324.t1,g3728.t1,g14872.t1,g14868.t1
Male sterility, NAD-binding	IPR013120_PF07993	Cluster_2	1	1	1	1	1	1	4	13	16	12	11	5	1	7	7	8	7	13	7	5	10	5	1	1	2	1	7	P07702	Q9P3Q7	A2QQV1,A2QH90,A2R9X2,A2QG45,A2QH58,A2QJ10,A5ABG0,A2QIQ8,A2QYV7,A2R6N2,A2QTE9,A2QYQ2,A2QWU2,A2QHV2,A2QBI9,A2QDU0	g659.t1
General substrate transporter	IPR005828_PF00083	Cluster_6	0	2	4	2	0	2	6	8	7	8	6	5	2	5	7	7	7	7	8	11	8	5	8	4	1	3	7		Q7S0R2,Q9P3B9	A2QDM3,A2R316,A2QLS6,A2QMG9,A2QN96,A2QL81,A2R4T2	g3159.t1,g1298.t1,g12423.t1,g10869.t1,g9791.t1,g10190.t1,g9981.t1,g14360.t1
D-isomer specific 2-hydroxyacid dehydrogenase, NAD-binding	IPR006140_PF02826	Cluster_1	3	3	3	2	4	2	4	7	6	8	8	7	6	7	4	7	5	7	7	14	8	8	8	2	1	1	7	P40510,P40054,P53100,Q02961	Q7RWH3,Q7RXD4,Q7S5T8,Q7S388,Q7S9Y7,Q8X0E6	A2QYK6,A2Q988,A2QRP0,A2R5K8,A2R9R5,A2QU03	g8376.t1,g6684.t1,g3274.t1,g5773.t1,g6126.t1,g10633.t1,g3837.t1,g7598.t1
Major facilitator superfamily	IPR011701_PF07690	Cluster_13	2	6	2	1	1	0	5	9	7	6	6	10	5	7	7	7	6	6	6	10	10	9	6	4	1	6	7	P25351	Q7SFY7,Q7S9N2,Q7S9W5,Q7S144,Q7SHU1	A2QB48,A2QII4,A2QTF4,A2R4U7,A2QRT0,A2RAQ5,A2R900	g3550.t1,g5699.t1,g8215.t1,g12000.t1,g57.t1,g8135.t1
Fibronectin type III-like domain	IPR026891_PF14310	Cluster_1	5	1	1	0	0	4	3	10	9	8	7	8	5	11	6	7	4	3	8	7	8	8	8	2	3	2	7		Q7S3R5,Q7RWP2,Q7SGM9,Q7S6Y6,Q9C2C4	A2QPK4,A5AAW4,A2RAL4,A2QS42,A2QWQ9,A2R4X0,A2R5M1,A2R2S3,A5ABF5	g5554.t1,g7159.t1,g10416.t1,g9392.t1,g2528.t1,g5574.t1,g7898.t1,g14099.t1
AMP-binding enzyme C-terminal domain	IPR025110_PF13193	Cluster_1	8	0	0	0	1	11	10	14	11	16	8	11	6	8	6	7	6	5	8	13	6	7	10	8	8	1	6.5	P38137	Q7S557,Q7S7F6,Q7SHX6,Q7S7K3,Q7SDW1,Q7SG79	A2R463,A2QTE5,A2QXP6,A2Q968,A2R3V6,A2QIQ3,A2R7U9,A5AAI8,A2QYT6,A2QK86,A2QRH8	g1473.t1,g11234.t1,g1154.t1,g8474.t1,g4617.t1,g12565.t1,g13361.t1,g14204.t1,g14537.t1,g16240.t1
DNA/RNA helicase, DEAD/DEAH box type, N-terminal	IPR011545_PF00270	Cluster_2	9	4	7	7	7	7	6	7	9	8	9	9	6	8	6	8	8	8	7	5	6	5	8	11	10	8	6.5	Q04217,P36009,P15938,P24384,P20095,P53131,Q06698	Q7SGC1,Q7SAB3,Q7S5P1,Q871L2,Q9HED9,Q9P5Z6	A2RAH0,A2R4P8,A2QKI0,A2QPZ8,A2R634,A2QKK4,A2QZH2,A2R3C2,A2RAP7	g4221.t1,g6730.t1,g13098.t1,g8149.t1,g5637.t1,g9216.t1,g4683.t1,g5891.t1
DapA-like	IPR002220_PF00701	Cluster_1	1	3	0	3	0	1	2	4	5	6	5	5	4	6	6	7	4	5	8	11	7	9	9	4	1	0	6.5		Q7RX51,Q7S219,Q7RZZ0,Q7S6G2	A2QDN4,A2R8M7,A2QUY4,A2QFM2,A2R5G5	g2576.t1,g3049.t1,g4647.t1,g106.t1,g3354.t1,g5539.t1,g8347.t1,g8354.t1,g6372.t1
Major facilitator superfamily	IPR011701_PF07690	Cluster_12	4	1	0	2	4	13	3	14	6	10	9	6	2	2	5	7	6	10	9	20	4	9	11	1	3	0	6.5	P38724,Q08299,P25596,P36173	Q7S1Y9,Q7S5F6	A2QGJ9,A2QZM9,A2QFY7,A2R1H5,A2R1X7,A2QFD9	g7536.t1,g10544.t1,g1497.t1,g7302.t1,g10842.t1,g15897.t1,g3610.t1,g8083.t1,g12776.t1,g14566.t1,g6312.t1
Peptidase S8/S53 domain	IPR000209_PF00082	Cluster_1	11	3	4	3	3	16	15	2	2	2	2	7	4	7	5	5	17	21	12	9	5	6	5	1	1	3	6.5	P09232,P25381,P25036	Q7S4Z5,Q7S0X5,Q7SHY0,Q870Y6	A2QTZ2,A2QMZ7	g86.t1,g3179.t1,g5739.t1,g2468.t1,g11868.t1
Heat shock protein 70 family	IPR013126_PF00012	Cluster_1	18	13	9	10	14	10	6	6	7	7	6	8	6	7	6	6	6	7	6	6	6	8	8	7	6	9	6	P16474,P10591,P10592,P09435,P22202,P11484,P40150,P12398,P32590,P39987,P32589,Q05931,P36016,P38788	P78695,Q01233,O74225,Q7SHW2,Q7RVX2,Q7RW06	A2QW80,A2QPM8,A2R006,A2R7X5,A2QNP5,A2QRA1,Q6A596	g10464.t1,g7694.t1,g3475.t1,g15211.t1,g9923.t1,g12601.t1,g6226.t1,g6227.t1
Helicase-associated domain	IPR007502_PF04408	Cluster_1	6	2	5	5	5	5	6	6	6	6	6	6	6	6	5	6	6	6	6	5	6	6	6	7	6	7	6	P36009,P15938,P24384,P20095,P53131	Q7SGC1,Q7SAB3,Q7SF56,Q871L2,Q872Z9,Q9P5Z6	A2RAH0,A2QKI0,A2QPZ8,A2QZH2,A2R3C2,A2RAP7	g4393.t1,g4221.t1,g8149.t1,g5637.t1,g9216.t1,g5891.t1
Domain of unknown function DUF1605	IPR011709_PF07717	Cluster_1	6	2	5	5	5	5	6	6	5	6	6	6	6	6	5	6	6	6	6	5	6	6	6	7	6	6	6	P36009,P15938,P24384,P20095,P53131	Q7SGC1,Q7SAB3,Q7SF56,Q871L2,Q872Z9,Q9P5Z6	A2RAH0,A2QKI0,A2QPZ8,A2R3C2,A2RAP7	g4393.t1,g4221.t1,g8149.t1,g5637.t1,g9216.t1,g5891.t1
Peptidase S33 tripeptidyl aminopeptidase-like, C-terminal	IPR013595_PF08386	Cluster_1	0	0	0	0	0	0	0	4	4	3	1	5	1	4	5	6	6	6	6	9	8	5	7	6	2	0	6		Q7SEA9	A2R1V9,A2R1X5,A2QGB0,A2R0G8	g2622.t1,g3011.t1,g3946.t1,g4549.t1,g5435.t1,g7874.t1,g12954.t1
Isopropylmalate dehydrogenase-like domain	IPR024084_PF00180	Cluster_1	7	4	4	4	4	4	5	8	6	7	7	6	4	6	6	6	5	5	7	8	6	6	7	4	6	2	6	P28834,P28241,P04173,P40495	P34738,Q7S9K8,Q7SFV4,Q7SH15	A2RBH7,A2QRC9,A2Q846,A2QB74,A2R529,A2QKC6	g2240.t1,g8847.t1,g14665.t1,g15713.t1,g7776.t1,g11088.t1,g11781.t1
Mini-chromosome maintenance, DNA-dependent ATPase	IPR001208_PF00493	Cluster_1	7	6	6	6	6	6	6	6	6	6	6	6	7	6	6	6	6	6	6	6	6	6	6	6	6	7	6	P38132,P30665,P29469,P24279,P29496,P53091	Q7SHD5,Q7SD07,Q7SHS5,Q7S9D8,Q7SAN2,Q871F1,Q8X0Y2	A2QU75,A2R3B7,A2Q816,A2R7V5,A2QZF3,A5AAD2	g12387.t1,g6032.t1,g12048.t1,g6369.t1,g8955.t1,g2624.t1
MCM N-terminal domain	IPR027925_PF14551	Cluster_1	7	6	6	6	6	6	6	6	6	5	6	3	6	5	6	6	6	6	6	6	6	5	6	6	6	6	6	P38132,P30665,P29469,P24279,P29496,P53091	Q7SD07,Q7SHS5,Q7S9D8,Q7SAN2,Q871F1,Q8X0Y2	A2QU75,A2R3B7,A2Q816,A2R7V5,A2QZF3,A5AAD2	g12387.t1,g6032.t1,g12048.t1,g6369.t1,g8955.t1,g2624.t1
Taurine catabolism dioxygenase TauD/TfdA	IPR003819_PF02668	Cluster_1	2	9	4	4	1	6	0	11	10	11	4	8	4	2	6	7	4	3	6	12	7	6	5	6	1	0	6	Q12358	Q7SB44,Q7S5S1,Q7SBE5,Q9HE64	A2QW28,A2R716,A2Q9Y7,A2QFT1,A2QM32,A2R1V7,A2R1W7,A5ABJ5,A2QMB5,A2R6C8	g2595.t1,g3624.t1,g7865.t1,g13586.t1,g10165.t1
Multicopper oxidase, type 3	IPR011707_PF07732	Cluster_1	3	0	0	0	0	1	1	3	7	3	2	4	8	8	2	4	5	8	6	6	8	2	1	4	3	6	6		P06811,Q7S2V2,Q7RYF6,Q7S9Z8,Q7S1M8,Q7S4C0,Q7S6W1,Q7SDL8	A2R723,A2Q7I8,A2QL29,A2QZQ7,A2QS62,A2QW24,A2RAC6	g9862.t1
Multicopper oxidase, type 1	IPR001117_PF00394	Cluster_1	2	0	0	0	0	1	1	2	7	3	1	4	8	8	2	3	5	10	6	6	8	2	1	4	2	8	6		P06811,Q7S2V2,Q7RYF6,Q7S9Z8,Q7S1M8,Q7S4C0,Q7S6W1,Q7SDL8	A2R723,A2Q7I8,A2QL29,A2QZQ7,A2QS62,A2QW24,A2RAC6	g9862.t1
Berberine/berberine-like	IPR012951_PF08031	Cluster_1	0	0	0	0	0	0	2	14	10	10	7	10	4	5	5	11	4	5	8	14	12	6	9	2	0	0	5.5		Q7SCE5,Q7SB35,Q8NIW9,Q8X0G1	A2QW39,A2QT98,A2Q7F3,A2QHB3,A2R2V0,A2QL34,A2R4X5,A2QAH0,A2R340,A2QBL4	g1270.t1,g6580.t1,g2476.t1,g4122.t1,g5941.t1,g8204.t1,g10858.t1,g7519.t1,g8202.t1
Zn(2)-C6 fungal-type DNA-binding domain	IPR001138_PF00172	Cluster_5	1	1	1	0	0	3	4	8	11	11	12	4	5	3	4	13	6	7	5	21	4	8	7	5	2	2	5.5		P11638,Q7RWF1,Q7RXL0,Q7SCY2,Q7S379	A2R2R3,A2QH42,A2QQV8,A2RAL0,A2QJS3,A2QYQ1,A2Q9D0,A2QL55,A2QBG3,A2QTF0,A2QYR8	g6651.t1,g11135.t1,g9398.t1,g11145.t1,g11935.t1,g1095.t1,g15554.t1
Dynamin central domain	IPR000375_PF01031	Cluster_1	0	0	0	0	0	0	6	7	3	5	2	4	4	6	5	6	6	6	4	5	6	2	4	0	0	3	5.5		Q7SBP5,Q7S3T2,Q7SAH6,Q7SFU2	A2QTG5,A2QF70,A5ABD6	g2645.t1,g7064.t1,g3900.t1,g13182.t1
Protein kinase domain	IPR000719_PF00069	Cluster_4	2	2	2	1	1	1	23	19	19	5	20	5	1	7	2	2	20	14	4	12	3	8	5	4	1	4	5.5	Q03656	Q7S3A6	A2QJT8,A2R2M0,A5AB23,A2QXW9,A2QAE4,A2R2W9,A2QU36,A2QZJ4,A2QX50,A2QZM8,A2QI62,A2QVC9,A2QWQ2,A2QWV3,A2QC46,A2QLG9,A2QNP3,A2R5V1,A2R4L8	g4977.t1,g8002.t1,g8265.t1,g13829.t1,g15843.t1
Catalase core domain	IPR011614_PF00199	Cluster_1	4	1	1	1	2	3	3	6	9	4	8	4	3	2	6	6	7	6	5	6	5	5	6	5	0	6	5.5	P15202,P06115	Q9C168,Q9C169,Q7S8G4	A2Q7Q4,A2R4B3,A5AB37,A2Q7T0,A2QH56,A2R129,A2QC95,A2QTS7,A2R2G8	g10907.t1,g14697.t1,g6690.t1,g11132.t1,g3614.t1,g8585.t1
Multicopper oxidase, type 2	IPR011706_PF07731	Cluster_1	1	0	0	0	0	0	1	2	7	3	2	4	8	8	2	3	4	8	5	6	9	2	1	3	2	7	5.5		P06811,Q7S2V2,Q7RYF6,Q7S9Z8,Q7S1M8,Q7S4C0,Q7S6W1,Q7SDL8	A2R723,A2Q7I8,A2QL29,A2QZQ7,A2QS62,A2QW24,A2RAC6	g9862.t1
Zn(2)-C6 fungal-type DNA-binding domain	IPR001138_PF00172	Cluster_7	1	4	4	3	3	2	1	7	7	7	9	1	1	2	5	6	3	2	5	12	7	6	7	0	1	0	5	P25502,P40467,P39529	Q9HE23	A2QVB5,A2QBE0,A2QLB8,A2QSJ8,A2QW52,A2QTP9,A2QWR9	g7494.t1,g6719.t1,g105.t1,g2073.t1,g2582.t1,g6570.t1,g7081.t1
Cytochrome b5-like heme/steroid binding domain	IPR001199_PF00173	Cluster_1	3	2	2	2	1	1	3	2	7	6	6	4	4	4	3	5	5	6	6	7	5	5	5	3	2	0	5	P40312	Q9P5L0,P08619,Q7S3C2,Q7SGM3	A2Q7D3,A2QRD2,A2QPB9,A2QPC0,A5AB91,A2QW99,A2QA06	g4554.t1,g5345.t1,g11071.t1,g13299.t1,g1321.t1
D-isomer specific 2-hydroxyacid dehydrogenase, NAD-binding	IPR006140_PF02826	Cluster_2	3	3	7	2	2	12	3	6	7	5	5	6	3	4	3	6	6	6	7	10	4	4	6	6	6	0	5	Q08911,P53839	Q07103,Q7SFE3,Q7SFV0	A2R1X3,A2QVH2,A2R5I6,A2QH07,A2R4H2,A2QA09,A2QX18	g2415.t1,g8362.t1,g13292.t1,g2638.t1,g8320.t1,g6697.t1
Thiolase, N-terminal	IPR020616_PF00108	Cluster_1	6	4	5	2	2	3	5	6	6	7	6	6	5	5	5	5	5	5	5	7	5	7	5	5	5	4	5	P27796,P41338	Q7S705,Q7S277,Q7S6N9,Q7SEJ3,Q7SHP4	A2R1B0,A2R1P1,A2R924,A2QCE8,A2QJ40,A2QRB1	g5233.t1,g640.t1,g7270.t1,g433.t1,g15748.t1
Fumarylacetoacetase, C-terminal	IPR002529_PF01557	Cluster_1	1	3	2	1	1	1	4	9	8	8	8	4	3	5	4	6	4	5	7	15	5	4	5	3	2	1	5	P53889	Q7SDX2,Q7SG36,Q7SAM3	A2Q8W7,A2QHB8,A2QL54,A2RBG8,A5AB73,A2QEZ9,A2QFQ2,A2QEN3	g5771.t1,g9632.t1,g11827.t1,g2128.t1,g2420.t1
ABC transporter-like	IPR003439_PF00005	Cluster_4	10	4	4	5	5	4	5	5	5	5	5	5	4	6	5	5	5	5	5	5	5	5	5	5	5	5	5	P16521,P53978,P43535,Q08972,P40024	Q7S0E4,Q7S9Z6,Q7RZG5,Q872I6	A2R4X2,A2R961,A2R321,A2R524,A2QMM5	g438.t1,g7972.t1,g7256.t1,g14094.t1,g15451.t1
P-type ATPase, A domain	IPR008250_PF00122	Cluster_2	9	5	5	5	5	4	4	4	5	4	4	4	5	5	5	5	5	5	5	6	5	4	5	4	4	5	5	P39524,Q12675,P32660,P40527,Q12674	Q7SF11,Q7S836,Q7RZL3,Q7S7W1,Q9HED0	A2R0J1,A2QTT0,A2QZD0,A2R4T3,A2QJE9	g849.t1,g11421.t1,g10508.t1,g9778.t1,g13777.t1
Catalase immune-responsive domain	IPR010582_PF06628	Cluster_1	4	1	1	1	2	3	3	6	8	4	6	4	3	2	5	6	5	4	4	6	5	5	5	5	0	4	5	P15202,P06115	Q9C168,Q9C169,Q7S8G4	A2Q7Q4,A2R4B3,A2Q7T0,A2QH56,A2R129,A2QC95,A2QTS7,A2R2G8	g10907.t1,g6690.t1,g11132.t1,g3614.t1,g8585.t1
Thiolase, C-terminal	IPR020617_PF02803	Cluster_1	8	4	4	2	2	3	5	6	6	7	6	6	5	4	5	5	5	5	5	7	5	7	5	5	5	4	5	P27796,P41338	Q7S705,Q7S277,Q7S6N9,Q7SEJ3,Q7SHP4	A2R1B0,A2R1P1,A2R924,A2QCE8,A2QJ40,A2QRB1	g5233.t1,g640.t1,g7270.t1,g433.t1,g15748.t1
Aspartic peptidase	IPR001461_PF00026	Cluster_1	0	0	0	0	0	0	2	4	3	2	3	4	5	7	5	5	5	7	3	3	4	3	0	1	0	1	5		Q7S3R4,Q7SD30,Q7SDD9,Q7SCF6,Q9C217	A2R3L3,A2Q7E3,A2R613
Tubulin/FtsZ, GTPase domain	IPR003008_PF00091	Cluster_1	11	3	3	4	4	4	4	6	4	6	5	3	4	4	6	5	5	5	5	7	6	5	4	5	4	3	5	P09733,P09734,P02557,P53378	P38668,P38669,P05220,P53377	A2QRL5,A2R599,A2Q8U9,A2QQP0	g15449.t1,g4735.t1,g13420.t1,g292.t1
Glycosyl transferase, family 28	IPR004276_PF03033	Cluster_1	0	1	1	1	1	1	2	6	6	3	5	5	3	4	3	3	7	5	9	11	5	8	4	2	2	5	5	Q06321	Q7S1I0,Q7SCP2,Q7RZT3	A2QNQ5,A2QKE5,A2R5M7,A5AB57,A2QDQ8,A5ABK3	g1724.t1,g7467.t1,g5568.t1,g7520.t1
Glucanosyltransferase	IPR004886_PF03198	Cluster_1	2	5	5	5	5	4	4	7	7	5	6	6	5	5	5	5	5	5	3	3	6	4	4	1	1	1	5	P22146,Q06135,Q03655,Q08271,Q08193	Q7S962,Q872H7,Q873D1,Q8X094,Q8X0X4	A2QRV4,A2QCC4,A2QHA8,A2R875,A2QE20,A2QT39,A2QUZ1	g2942.t1,g5849.t1,g14556.t1,g6200.t1
Tubulin/FtsZ, 2-layer sandwich domain	IPR018316_PF03953	Cluster_1	11	3	3	4	4	4	4	6	4	7	5	3	4	4	5	5	5	5	5	7	6	5	4	5	3	4	5	P09733,P09734,P02557,P53378	P38668,P38669,P05220,P53377	A2QRL5,A2R599,A2Q8U9,A2QQP0	g15449.t1,g4735.t1,g13420.t1,g292.t1
Extracellular membrane protein, CFEM domain	IPR008427_PF05730	Cluster_1	0	0	0	0	0	0	0	0	1	3	2	5	0	11	3	3	2	4	8	9	12	6	2	0	0	0	5			A2R135	g11294.t1,g11545.t1
NADH:flavin oxidoreductase/NADH oxidase, N-terminal	IPR001155_PF00724	Cluster_1	7	11	6	2	2	6	0	5	5	5	5	5	1	2	3	10	3	5	6	10	6	5	2	2	0	0	5	Q03558,P41816	Q7RWB4	A5AB78,A2QPA4,A2QXD3,A2R3W8,A2QG15	g14356.t1,g7073.t1
AMP-dependent synthetase/ligase	IPR000873_PF00501	Cluster_3	7	0	0	0	0	0	0	12	11	7	7	5	1	6	3	8	3	4	6	4	8	5	4	16	4	0	4.5		Q7RW48	A2QBD5,A2QLH0,A2QW87,A2QWK3,A2QR54,A2R7P4,A2R0W7,A2QBQ2,A2R143,A2QT17,A2R1U4	g13652.t1,g14576.t1,g21.t1,g7081.t1
Peptidase S8/S53 domain	IPR000209_PF00082	Cluster_3	0	0	0	0	0	0	3	4	6	2	3	6	3	4	5	12	5	8	2	3	5	1	3	9	1	3	4.5		Q7SBZ0,Q7S1D2,Q7S8P7	A2QFW4,A2QVE4,A2QR36,A2Q7S3,A2R2Z3,A2R746	g11130.t1,g10132.t1,g7278.t1
Amino acid/polyamine transporter I	IPR002293_PF13520	Cluster_3	2	4	2	4	2	4	1	6	4	7	3	3	3	5	4	4	3	3	7	10	7	5	6	2	0	0	4.5	P50276,P38734	Q7S4C6,Q7S3S5,Q7S1S4	A2QIL4,A2QXF9,A2QRZ8,A2QT74	g12224.t1,g5979.t1,g7221.t1,g730.t1,g9370.t1,g8070.t1
Flavin monooxygenase-like	IPR020946_PF00743	Cluster_2	3	3	4	6	1	2	2	6	3	5	4	3	3	3	4	5	3	3	8	15	7	7	5	2	1	0	4.5	P38866	Q7S0M1,Q7SBE3,Q9C2H5	A2QUH8,A2R798,A2R1W6	g6863.t1,g660.t1,g7214.t1,g12906.t1,g9524.t1
Glycoside hydrolase, family 16	IPR000757_PF00722	Cluster_1	3	2	2	1	1	2	2	6	5	4	7	3	4	4	4	4	5	5	5	5	5	4	4	0	0	1	4.5	P53301	Q7S0F8,Q7S222,Q7S7D0,Q7SGL2	A2R7A5,A2R1U8,A2QAC9,A2QVI4,A2R5S2	g5094.t1,g7838.t1,g9156.t1,g12279.t1
Proteinase inhibitor I9	IPR010259_PF05922	Cluster_1	3	2	3	2	3	8	15	2	2	2	2	5	3	5	3	4	10	12	11	9	4	4	4	1	1	3	4.5	P09232,P25381,P25036	Q7S0X5,Q7SHY0,Q870Y6	A2QTZ2,A2QMZ7	g86.t1,g3179.t1,g2468.t1,g11868.t1
Transcription factor domain, fungi	IPR007219_PF04082	Cluster_5	0	4	2	1	1	1	0	10	7	8	8	3	1	3	2	3	4	4	7	32	10	5	13	0	1	0	4	P25502	Q7S6B3	A2QT15,A2QVB5,A2QLB8,A2QZK3,A2R279,A2QFT9,A2QJ67	g13.t1,g4567.t1,g6719.t1,g14022.t1,g12866.t1,g2582.t1,g7952.t1,g6303.t1,g3050.t1,g15984.t1,g4974.t1,g5016.t1,g12653.t1
Peptidase S10, serine carboxypeptidase	IPR001563_PF00450	Cluster_1	8	4	5	3	3	10	4	3	4	2	3	4	2	2	3	3	4	4	6	12	4	4	2	13	5	7	4	P00729,P09620,P38109	Q7RXW8,Q871G2	A2QWT4,A5AB21,A2QPW5,A2QKY5	g7388.t1,g15630.t1
Copper amine oxidase, C-terminal	IPR015798_PF01179	Cluster_1	2	2	2	1	0	3	5	6	6	5	6	4	1	4	2	3	4	4	6	13	5	6	7	1	2	1	4		Q7S6S1	A2QTC0,A2R1C2,A2QEF8,A2QFT7,A2QNN3,A2R940	g12781.t1,g7172.t1,g8186.t1,g8476.t1,g10795.t1,g12087.t1,g14535.t1
Major facilitator superfamily	IPR011701_PF07690	Cluster_16	2	5	2	0	1	0	2	8	7	5	4	4	2	3	5	4	4	4	6	10	5	4	6	2	1	0	4	Q08280	Q8WZT8,Q9P3K6	A2R354,A2QMT6,A2RA96,A2QL22,A2R280,A2R8M3,A2R5Q2	g13222.t1,g13692.t1,g5780.t1,g3813.t1,g10704.t1,g10917.t1
Glycosyl hydrolase family 92	IPR012939_PF07971	Cluster_1	0	0	1	0	0	0	2	7	5	5	3	7	2	6	6	6	4	4	0	0	4	3	2	3	2	0	4		Q7S6N7,Q7S947	A2R1H6,A2QS54,A2R7B1,A2QQM7,A2R3G8	g10399.t1,g1873.t1
Taurine catabolism dioxygenase TauD/TfdA	IPR003819_PF02668	Cluster_2	1	0	0	0	0	0	1	5	4	4	4	3	5	5	3	3	3	4	4	7	4	4	5	0	1	0	4		Q7S4C5,Q7SAI5,Q7SCQ6,Q7S1T5,Q8WZQ9	A2R719,A2R0Q7,A2R9T2,A2QWI0	g9367.t1,g198.t1,g3769.t1,g7986.t1,g9802.t1
Glycosyl hydrolase, family 13, catalytic domain	IPR006047_PF00128	Cluster_1	1	5	2	0	6	0	1	9	8	8	9	5	4	4	3	3	4	4	6	7	6	5	9	5	1	1	4	P53341,P38158,P40884,P40439,P53051,Q08295	Q7SBU9,Q7S8A4,Q7SDJ6,Q7S4K0	A2R267,A2QW02,A2R6F9,A2QF44,A2QJF8,A2QTS4,A2QYT9,A2QL05	g14719.t1,g124.t1,g7903.t1,g1282.t1,g9799.t1,g723.t1,g742.t1,g14150.t1,g14705.t1
Lipopolysaccharide-modifying protein	IPR006598_PF05686	Cluster_1	0	0	0	0	0	0	2	3	3	2	5	3	2	4	5	6	4	5	5	4	3	4	1	1	2	4	4		Q7S4S9,Q7RYY5	A2Q8J6,A2RAV2,A2QC99	g6713.t1
Cell division protein GTP binding	IPR000038_PF00735	Cluster_1	25	7	7	7	7	8	4	4	4	4	4	4	4	4	4	4	4	4	4	4	4	4	4	4	3	13	4	P25342,P32458,P32468,P32457,Q07657,Q04921,P41901	Q7RVY1,Q7RW14,Q9C271,Q9HFK9	A2QUD4,A2QMP4,A2QNC1,A2QPV3	g2939.t1,g6825.t1,g3489.t1,g10814.t1
SNF2-related	IPR000330_PF00176	Cluster_1	10	5	5	5	6	5	4	4	3	4	4	4	4	4	4	4	4	4	4	4	4	4	4	3	3	5	4	P32657,P38144,Q08773,P22082,P32597,P43610	Q7SD03,Q7RYI6,Q7S7G9,Q7RXH5	A2Q9U8,A2QQE1,A2Q9V0	g6038.t1,g509.t1,g4841.t1,g9475.t1
STAS domain	IPR002645_PF01740	Cluster_1	5	1	1	0	1	1	2	1	2	1	3	3	2	4	3	4	4	4	4	4	4	4	4	2	1	0	4	P38359	P23622,Q7SGT5	A2R5K2,A2Q8F0	g1679.t1,g10927.t1,g11553.t1,g15143.t1
Glycosyl transferase, family 15	IPR002685_PF01793	Cluster_1	15	6	6	6	9	4	3	3	3	3	3	3	5	4	4	4	4	4	4	5	4	5	4	2	2	2	4	P27809,P27810,P33550,P38130,P38131,P53966,P54070,P40504,P26725	Q7SAY4,Q7S9I5,Q7S5C2,Q7RZH8,Q9HEK0	A2QEA1,A2R3D5,A2RA74	g9819.t1,g2121.t1,g4487.t1,g12618.t1
ATPase, AAA-type, core	IPR003959_PF00004	Cluster_4	0	0	0	0	0	0	1	2	1	2	2	3	2	5	2	2	2	5	4	6	4	5	2	1	0	0	4		Q9C2I8,Q9P5J9	A2R5D4	g8866.t1,g13118.t1
Actin-related protein	IPR004000_PF00022	Cluster_1	7	4	4	4	4	4	4	5	4	4	4	3	4	4	4	4	4	4	4	4	4	4	4	4	4	4	4	P60010,P38696,P32381,P47117	P38673,P78711,P78712,Q870X5	A2QRK9,A2RAH8,A2Q9U2,A2R4I7	g4050.t1,g273.t1,g13764.t1,g4451.t1
Cation-transporting P-type ATPase, N-terminal	IPR004014_PF00690	Cluster_1	2	1	2	1	3	2	2	3	2	3	4	3	3	4	3	2	4	4	5	6	4	5	7	0	1	0	4	P13587,Q01896,Q12691	Q7RVS6,Q7S919,Q9UUX7	A2QT41,A2R4W4	g15882.t1,g11128.t1,g12588.t1,g15035.t1,g6119.t1,g12865.t1,g7148.t1
Carbamoyl-phosphate synthetase large subunit-like, ATP-binding domain	IPR005479_PF02786	Cluster_1	6	3	3	3	5	5	5	6	5	6	6	5	3	4	3	4	5	6	4	7	5	4	4	5	5	3	4	Q00955,P32528,P32874,P11154,P32327	Q7SBL5,Q7SHV6,Q7SI60	A2QI31,A2QN39,A2QZ87,A2R562,A2QB42	g4084.t1,g9150.t1,g586.t1,g10447.t1
Transcription factor domain, fungi	IPR007219_PF04082	Cluster_7	0	0	0	0	0	1	1	5	5	8	4	3	3	1	5	7	3	4	4	10	4	3	2	1	1	2	4		Q7RXL0,Q7SCY2,Q7S379	A2Q9D1,A2R2R3,A2QYQ1,A2QTF0,A2QYR8	g6651.t1,g11135.t1
Oxidoreductase, FAD-binding domain	IPR008333_PF00970	Cluster_1	6	3	3	3	4	3	2	5	6	6	6	3	4	4	2	4	5	3	6	7	4	4	4	2	2	2	4	P36060,P38626,Q04516,Q12746	Q7RXL1,Q7S875,Q7SFY2,Q7SGM3	A2Q7D3,A2R666,A5AB91,A2Q898,A2QA06,A2QCV4	g4554.t1,g12887.t1,g2658.t1,g8496.t1
Magnesium transporter NIPA	IPR008521_PF05653	Cluster_1	9	1	1	2	0	4	4	5	4	4	4	4	4	4	4	4	5	6	4	4	4	4	4	4	4	5	4		Q7RWT8,Q7SF08,Q7SBA5,Q7RYF0	A2R0I7,A2QB83,A2QKJ5,A2R966	g2229.t1,g9852.t1,g12131.t1,g9784.t1
Multicopper oxidase, type 2	IPR011706_PF07731	Cluster_2	4	2	5	2	3	3	0	2	4	2	4	2	2	3	4	5	4	4	4	4	4	3	1	2	2	4	4	P38993,P43561,Q04399	Q7S065,Q8X010	A2R3T0,A2Q9S8,A2R5T8,A2QAD6	g13625.t1
BCS1, N-terminal	IPR014851_PF08740	Cluster_1	1	0	0	0	0	0	1	2	2	2	2	2	2	4	2	2	2	5	4	5	4	5	2	1	0	0	4		Q9C2I8,Q9P5J9	A2Q819,A2R5D4	g8866.t1,g13118.t1
Multicopper oxidase, type 1	IPR001117_PF00394	Cluster_2	3	2	5	2	3	2	0	2	4	2	4	3	2	3	4	5	3	4	4	4	4	3	1	1	2	4	4	P38993,P43561,Q04399	Q7S065,Q8X010	A2R3T0,A2Q9S8,A2R5T8,A2QAD6	g13625.t1
Zn(2)-C6 fungal-type DNA-binding domain	IPR001138_PF00172	Cluster_9	0	1	0	1	0	1	4	3	2	5	9	3	2	2	7	10	1	4	8	14	2	4	3	1	1	1	4		Q7RV19,Q7SAP0	A2QZX5,A2Q808	g4562.t1,g12413.t1,g15671.t1
Ergosterol biosynthesis ERG4/ERG24	IPR001171_PF01222	Cluster_1	6	2	2	2	2	2	2	9	4	3	7	2	2	3	3	3	4	4	4	4	5	4	2	2	2	4	4	P32462,P25340	P38670,Q7S7W3	A2R3X1,A2Q984,A2QPJ7,A2RAK8	g5575.t1,g8170.t1
Glycoside hydrolase, family 47	IPR001382_PF01532	Cluster_1	3	0	0	0	0	1	2	1	1	2	1	4	4	4	4	4	4	3	5	6	6	4	2	0	1	0	4		Q7S2U7,Q7S5K7,Q7SDV6,Q8X0C6	A2QJG4	g4589.t1,g4499.t1
UDP-glucuronosyl/UDP-glucosyltransferase	IPR002213_PF00201	Cluster_1	2	1	1	1	1	1	2	2	2	2	1	3	2	1	2	2	6	5	6	6	4	4	3	1	0	4	4	Q06321	Q7SCP2,Q7RZT3	A2R5M7,A5ABK3	g1724.t1,g5568.t1,g7520.t1
Transcription factor domain, fungi	IPR007219_PF04082	Cluster_13	0	0	0	0	0	1	0	3	2	1	2	1	1	2	5	4	4	5	5	9	1	3	1	1	0	0	4		Q8X0N9	A2QS64,A2R6H6	g8893.t1
Multicopper oxidase, type 3	IPR011707_PF07732	Cluster_2	2	2	5	2	3	2	0	2	4	2	4	3	2	3	4	4	3	4	4	4	4	3	1	1	1	2	4	P38993,P43561,Q04399	Q7S065,Q8X010	A2R3T0,A2Q9S8,A2R5T8,A2QAD6	g13625.t1
Cation transporter	IPR003445_PF02386	Cluster_1	3	1	2	1	2	1	2	5	4	3	3	4	2	4	1	1	4	4	4	6	2	4	2	2	1	0	4	P12685,P28584	Q7S450,O74723	A2R8F4,A2QGC8,A2Q9W1,A2QAA9	g11129.t1,g2015.t1
Male sterility, NAD-binding	IPR013120_PF07993	Cluster_3	7	0	0	0	0	0	0	10	9	7	6	4	1	4	3	7	3	3	4	4	6	3	4	14	4	0	3.5		Q7RW48	A2QW32,A2QW87,A2QWK3,A2QR54,A2R0W7,A2QBQ2,A2R143,A2QT17,A2R1U4	g13652.t1,g14576.t1,g21.t1,g7081.t1
Alcohol dehydrogenase GroES-like	IPR013154_PF08240	Cluster_5	1	0	0	0	0	0	0	8	7	6	4	4	3	2	6	12	2	3	4	14	4	2	9	3	1	0	3.5		Q7S0R4,Q7SAC7,Q7S994	A2QBC7,A2R4B1,A2QC27,A2QI91,A2R5H3,A2QV09,A2R886	g10048.t1,g11225.t1,g13305.t1,g15273.t1,g6317.t1,g7220.t1,g740.t1,g14594.t1,g12937.t1
Aminotransferase, class IV	IPR001544_PF01063	Cluster_1	4	2	2	1	2	2	3	5	6	6	5	6	3	3	3	5	5	5	4	9	3	3	5	2	3	1	3.5	P38891,P47176	Q7SFT9,Q7S699,Q9HEB7	A2QD81,A2QTG2,A2QHM8,A2QKR3,A2Q939,A2QV14	g8360.t1,g15333.t1,g5219.t1,g5518.t1,g2643.t1
Beta-ketoacyl synthase, N-terminal	IPR014030_PF00109	Cluster_2	0	0	0	0	0	0	0	7	4	6	3	4	1	4	2	3	5	7	4	2	7	2	1	0	1	0	3.5		Q7S736	A2QK66,A2QH36,A2QX22,A2QUI2	g13622.t1
Copper amine oxidase, N2-terminal	IPR015800_PF02727	Cluster_1	1	1	1	1	0	3	4	5	4	5	5	4	1	3	2	3	3	4	4	12	4	6	5	0	2	1	3.5		Q7S6S1	A2R1C2,A2QEF8,A2QNN3,A2R940	g12781.t1,g7172.t1,g8186.t1,g8476.t1,g10795.t1
Peptidase S8/S53 domain	IPR000209_PF00082	Cluster_4	0	0	0	0	0	0	0	0	1	0	0	1	0	1	3	18	4	5	5	10	3	0	1	0	0	0	3.5			A2R2Q0	g14715.t1
Intradiol ring-cleavage dioxygenase, C-terminal	IPR000627_PF00775	Cluster_2	0	2	2	0	0	0	2	3	4	5	4	3	3	3	3	4	4	4	3	7	5	3	6	2	1	1	3.5		Q7RW43,Q7RZE7,Q7SE81	A2QEL8,A2QAP8,A2QNW8,A2R1P9	g5342.t1,g38.t1,g4454.t1,g14479.t1,g5176.t1,g7883.t1
Glycoside hydrolase, family 10	IPR001000_PF00331	Cluster_1	0	1	0	0	0	0	0	4	1	3	3	7	4	7	1	1	0	0	5	3	9	4	5	6	1	2	3.5		Q7S6C2,Q7RW51,Q7S3P8,Q7S0Y0	A2QFV7	g13085.t1,g8309.t1,g1907.t1,g5074.t1,g8156.t1
Zn(2)-C6 fungal-type DNA-binding domain	IPR001138_PF00172	Cluster_8	0	6	2	0	4	3	0	6	3	4	6	2	2	2	4	6	3	3	8	14	3	5	5	0	1	0	3.5	P53338,P38157,P43551,Q06595	Q7SC85,Q9C2Q2	A2QW78,A2Q9Y9,A2QJF6	g3620.t1,g6294.t1,g7596.t1,g11642.t1,g722.t1
Aminotransferase, class I/classII	IPR004839_PF00155	Cluster_4	0	0	0	0	0	0	2	11	5	4	3	2	0	1	4	3	4	5	3	8	1	4	4	0	1	1	3.5			A2QCR0,A2QLN2,A2R0Y4,A2QEG9,A2QZS8	g1279.t1,g15091.t1,g3607.t1,g926.t1
Transcription factor domain, fungi	IPR007219_PF04082	Cluster_9	0	4	5	0	0	0	1	4	2	1	1	2	2	2	5	3	4	4	7	6	3	2	7	0	0	0	3.5		Q7RW44,Q7S3X5	A2QAK7,A2R8V1	g32.t1,g40.t1,g7886.t1,g13367.t1,g11022.t1,g14478.t1,g11731.t1
Heat shock protein 70 family	IPR013126_PF00012	Cluster_2	1	0	0	0	0	0	2	2	4	4	0	3	2	3	4	7	1	4	4	4	3	2	3	0	0	0	3.5		Q7RZ77,Q9P5S4	A2QH62,A2R0T6,A2R7Z3,A2QXA7	g5334.t1,g10863.t1,g13912.t1
Zn(2)-C6 fungal-type DNA-binding domain	IPR001138_PF00172	Cluster_11	0	0	0	0	0	0	1	1	5	4	8	2	1	3	4	6	3	3	7	14	5	1	4	0	0	0	3.5		P78704	A2QBF6,A2QIT9,A2R1K8,A2QDX4,A2QHD7	g12864.t1,g11746.t1,g9405.t1,g4981.t1
Permease, cytosine/purines, uracil, thiamine, allantoin	IPR001248_PF02133	Cluster_1	0	4	1	3	6	2	3	6	6	7	5	11	1	5	2	2	3	4	3	8	10	4	3	2	2	0	3.5	Q04895,P38196,P05316,Q05998,Q08485,Q08579	Q7SA29	A2R0K8,A2R284,A2QH49,A2R290,A2QRJ3,A2QM07	g934.t1,g13324.t1,g8226.t1
P-type ATPase, A domain	IPR008250_PF00122	Cluster_3	3	3	2	2	2	2	3	4	2	2	8	4	3	3	3	3	4	5	5	6	4	3	3	4	2	1	3.5	P38360,P38995	Q7S316,Q7SGS2,Q7RZE4	A2Q9J7,A2QDY5	g13551.t1,g2678.t1,g10204.t1
HAD-like domain	IPR023214_PF00702	Cluster_3	3	3	2	2	2	2	3	4	2	2	9	4	3	3	3	3	4	5	5	6	4	3	3	4	2	1	3.5	P38360,P38995	Q7S316,Q7SGS2,Q7RZE4	A2Q9J7,A2QDY5	g13551.t1,g2678.t1,g10204.t1
Protease-associated domain, PA	IPR003137_PF02225	Cluster_1	0	1	1	1	1	1	1	2	1	2	1	5	1	6	2	2	2	2	6	5	5	6	4	0	1	0	3.5	P37302	Q7RZ44	A2QG29	g5757.t1,g9893.t1,g12948.t1,g15834.t1
Cation-transporting P-type ATPase, N-terminal	IPR004014_PF00690	Cluster_2	7	1	1	1	1	1	2	4	3	5	5	2	2	3	3	2	4	5	5	6	6	3	4	1	1	1	3.5	P38929	Q9UUY1,Q9UUY2	A2QQN0,A2QDA2,A2RBM0	g12401.t1,g2828.t1,g8325.t1,g27.t1
Peptidase M28	IPR007484_PF04389	Cluster_3	0	1	1	1	1	1	1	2	1	2	1	6	1	6	2	2	2	2	6	5	5	6	4	0	1	0	3.5	P37302	Q7RZ44	A2QG29	g5757.t1,g9893.t1,g12948.t1,g15834.t1
Phosphate transporter	IPR001204_PF01384	Cluster_1	0	1	1	1	1	1	2	4	1	4	3	3	1	3	1	1	4	4	4	4	3	7	6	0	1	0	3.5	P38361	P15710	A2QBI6	g16294.t1,g1021.t1,g1490.t1,g10374.t1,g11125.t1,g11062.t1
Acyl carrier protein-like	IPR009081_PF00550	Cluster_3	6	0	0	0	0	0	0	9	8	4	4	2	1	2	3	5	3	4	4	2	6	3	4	5	3	0	3		Q7RW48	A2QW87,A2QWK3,A2QR54,A2R0W7,A2QBQ2,A2R143,A2QT17,A2R1U4	g13652.t1,g14576.t1,g21.t1,g7081.t1
PA14	IPR011658_PF07691	Cluster_1	0	6	1	1	0	1	0	4	3	4	4	2	1	2	3	3	1	1	6	17	4	3	7	3	0	0	3		Q7SG54	A2R989,A2QLQ2,A2QH25	g4002.t1,g8196.t1,g6005.t1,g9408.t1,g1737.t1,g11617.t1,g3618.t1
Beta-lactamase-related	IPR001466_PF00144	Cluster_2	0	0	0	0	0	1	1	4	0	2	2	4	2	5	2	3	2	3	5	11	3	2	2	0	0	0	3		Q7SD31,Q7RUH9		g7224.t1,g6727.t1
Transcription factor domain, fungi	IPR007219_PF04082	Cluster_6	9	1	1	1	1	1	3	6	4	7	5	7	1	3	3	3	2	1	6	7	7	4	7	0	0	0	3	P21657	Q7S2G1	A2QEL3,A2QGF1,A2QFN4,A2QTZ6	g5563.t1,g6711.t1,g8233.t1,g6872.t1,g5199.t1,g1280.t1,g12156.t1
Major facilitator superfamily	IPR011701_PF07690	Cluster_15	4	1	1	0	0	1	2	5	3	6	6	5	1	3	2	3	3	2	6	10	5	3	6	1	4	1	3		Q7S191	A2QLU9,A2QTQ0,A2R907	g5438.t1,g7740.t1,g13132.t1,g10850.t1,g3637.t1,g11592.t1
Major facilitator superfamily	IPR011701_PF07690	Cluster_17	0	3	2	0	0	2	0	4	1	3	3	5	1	2	5	4	3	3	2	6	4	3	6	1	2	2	3		Q7S194	A2QG08	g3906.t1,g6060.t1,g13476.t1,g13793.t1,g5776.t1,g7409.t1
Glycoside hydrolase, family 31	IPR000322_PF01055	Cluster_1	1	2	3	1	1	1	1	4	3	5	6	7	4	2	2	3	3	3	2	3	3	2	5	5	2	2	3	P38138	Q7S3A8,Q7S1M6,Q7SHN5,Q8NIY3	A2QUJ7,A2QAC1,A0PCH8	g123.t1,g965.t1,g9758.t1,g5704.t1,g6354.t1
Permease, cytosine/purines, uracil, thiamine, allantoin	IPR001248_PF02133	Cluster_2	0	4	3	2	4	2	1	6	5	5	4	5	1	2	2	4	4	4	4	3	3	1	1	4	1	0	3	P40039,Q12119,P17064,P53099	Q8NJ09	A2QQN6,A2R7Z5,A2QW96,A2QNX8,A2QF66	g3820.t1
Quinate/shikimate 5-dehydrogenase/glutamyl-tRNA reductase	IPR006151_PF01488	Cluster_1	1	2	1	1	1	1	2	8	7	3	4	5	4	4	3	3	3	3	7	6	3	3	5	1	2	3	3	P08566	P11635,P11637,Q7RW62,Q8X071	A2QHG6,A2QJS7,A2QQV9,A2QJS2,A2QJS5,A2QRQ0,A2QGL3	g7498.t1,g13204.t1,g1096.t1,g1093.t1,g1898.t1
Protein kinase domain	IPR000719_PF00069	Cluster_5	17	8	5	7	9	4	3	4	4	3	3	3	3	4	3	3	3	3	3	3	3	3	3	3	2	2	3	P25333,P38970,Q08732,Q12100,P36004,P22211,Q12310,P36002,P47116	Q7SDZ6,Q7RX41,Q7SBJ1	A2R9M2,A2RAE4,A2R1G4,A2QNC8	g3366.t1,g14588.t1,g15010.t1
Protein kinase domain	IPR000719_PF00069	Cluster_6	18	3	3	3	4	2	2	3	2	2	3	2	2	2	4	3	3	3	2	3	2	5	6	5	2	7	3	P29295,P23291,P23292,P39962	Q7RVN1,Q870P9	A2QVG8,A2RBA4	g4469.t1,g1849.t1,g10424.t1,g10567.t1,g10725.t1,g15822.t1
Guanine nucleotide binding protein (G-protein), alpha subunit	IPR001019_PF00503	Cluster_1	11	2	2	2	2	2	3	4	4	3	4	4	3	3	3	3	4	4	3	3	3	3	4	11	4	4	3	P08539,P10823	Q05425,Q05424,Q9HFW7	A2QDR2,A2QRI2,A2QRF3,A2QQD2	g12727.t1,g251.t1,g4170.t1,g875.t1
Zn(2)-C6 fungal-type DNA-binding domain	IPR001138_PF00172	Cluster_10	1	1	1	0	0	0	0	4	3	6	6	3	3	5	2	2	3	5	7	18	2	3	6	0	1	0	3		Q7SEC6,Q7S9K1,Q7S2I8	A2QGH9,A2QKF3,A2R882	g5537.t1,g9407.t1,g13683.t1,g138.t1,g7705.t1,g3997.t1
Cytochrome b5-like heme/steroid binding domain	IPR001199_PF00173	Cluster_2	2	2	1	1	1	1	1	8	4	5	5	4	2	3	3	3	2	2	3	10	3	1	4	4	2	1	3	P00175	Q7S8J5,Q7S0C1	A2QIA6,A2R2X1,A2QZX1,A2QJX1	g13332.t1,g419.t1,g3728.t1,g14868.t1
Beta-lactamase-related	IPR001466_PF00144	Cluster_1	0	2	1	0	0	2	3	7	3	3	3	4	2	3	2	3	2	4	3	8	3	5	2	0	3	0	3		Q7S290,Q9P569	A2QZW3,A5ABC0,A2QKW4	g3599.t1,g14634.t1
Glycosyl transferase, family 20	IPR001830_PF00982	Cluster_1	8	3	3	3	4	3	4	6	6	4	10	3	3	3	4	5	4	4	3	3	3	3	0	3	3	2	3	Q00764,P31688,P38426,P38427	Q7SFT8,Q7RX47,Q7S2R1	A2QP99,A2QSF2,A2QPA0,A2R2W4,A2R191,A2QY17
CoA-transferase family III	IPR003673_PF02515	Cluster_1	0	1	1	0	0	0	1	4	6	3	2	3	2	6	1	5	2	4	3	7	3	2	4	0	0	0	3		Q7RWS0,Q7SA18	A2RAS6,A2QF52,A2QZ09,A2QL48,A2RBK0,A5AAC1	g37.t1,g3927.t1,g7662.t1,g14476.t1
FAD-linked oxidase, C-terminal	IPR004113_PF02913	Cluster_1	1	3	3	1	1	1	2	4	3	3	2	4	3	2	3	4	2	3	4	5	3	2	4	3	1	1	3	P32891	Q7SE05,Q7S4K5,Q7SCV2	A2QZV2,A2QXM7,A2QY53	g2901.t1,g8189.t1,g9035.t1,g14595.t1
Chitin synthase	IPR004834_PF01644	Cluster_1	6	4	3	2	2	3	3	6	5	4	5	3	3	3	3	3	3	3	4	5	3	3	4	4	4	5	3	P08004,P14180	P29070,P30589,P30588	A2R0Z5,A2QU15,A2R2G5,A2QNG6,A2QHC2	g13049.t1,g14957.t1,g8941.t1,g234.t1
General substrate transporter	IPR005828_PF00083	Cluster_11	1	3	4	0	1	3	1	3	6	2	3	2	1	3	3	4	3	4	2	3	3	0	0	2	1	1	3	P25346	Q7S6M6	A2QDS9,A2R9W0,A2QBE2,A2QK98,A2QVT7,A2R881
Transcription factor domain, fungi	IPR007219_PF04082	Cluster_10	0	0	0	0	0	1	2	4	6	2	5	2	1	3	2	8	4	3	3	6	3	3	7	0	0	0	3		Q7RYH2	A2QN03,A2R8A4,A2QBC1,A2QBC6,A2R645,A5AB76	g12540.t1,g8365.t1,g10632.t1,g10911.t1,g12159.t1,g14351.t1,g11280.t1
Extracellular membrane protein, CFEM domain	IPR008427_PF05730	Cluster_3	0	0	0	0	0	0	0	0	0	0	0	0	3	1	3	4	2	3	1	3	3	1	4	0	0	0	3		Q7SC86,Q872R6,Q9C2R4		g14567.t1,g11725.t1,g12686.t1,g4536.t1
Major facilitator superfamily	IPR011701_PF07690	Cluster_18	1	5	3	3	1	4	0	7	5	7	1	2	3	1	2	3	1	2	3	8	5	6	4	4	1	0	3	P40445	Q7S2T6,Q7S1R1,Q7SB45	A2QM65,A2QRL2,A2Q9Y8,A2QAG8,A2R715	g9348.t1,g13583.t1,g7867.t1,g9362.t1
Alcohol dehydrogenase, C-terminal	IPR013149_PF00107	Cluster_4	3	2	2	0	1	1	0	4	4	3	2	3	2	3	1	3	3	1	3	6	4	2	1	9	2	0	3	Q03102	Q7S2T5,Q7S571	A2R334,A2QZC1,A2RAH9,A2R1G2	g14397.t1
Chitin synthase N-terminal	IPR013616_PF08407	Cluster_1	5	4	3	2	2	3	3	6	5	5	5	2	3	3	3	3	3	3	4	4	3	3	4	4	4	5	3	P08004,P14180	P29070,P30589,P30588	A2R0Z5,A2QU15,A2R2G5,A2QNG6,A2QHC2	g13049.t1,g14957.t1,g8941.t1,g234.t1
Peptidase S53, propeptide	IPR015366_PF09286	Cluster_1	0	0	0	0	0	0	3	3	4	2	2	5	2	4	3	4	5	5	3	3	3	1	2	8	1	3	3		Q7SBZ0,Q7S1D2	A2QL74,A2QR36,A2R2Z3,A2R746	g10132.t1,g7278.t1
Biotin/lipoyl attachment	IPR000089_PF00364	Cluster_1	5	2	2	2	3	4	3	5	4	5	5	4	2	3	1	3	2	4	3	3	4	2	3	3	4	1	3	P32528,P11154,P32327	Q7SHV6,Q7SI60	A2QI31,A2QN39,A2R562,A2QB42	g9150.t1,g586.t1,g10447.t1
Gamma-glutamyltranspeptidase	IPR000101_PF01019	Cluster_1	3	2	2	1	1	2	2	4	3	2	5	2	2	3	4	4	3	5	3	4	3	3	2	2	3	2	3	Q05902	Q7RV00,Q9C2D7	A2Q9X0,A2QEY7,A2R1I0	g230.t1,g4441.t1
Forkhead-associated (FHA) domain	IPR000253_PF00498	Cluster_1	3	2	2	2	3	1	5	2	2	2	2	2	3	3	3	3	3	3	2	4	2	3	3	2	0	1	3	P39009,P24719,P22216	Q7SCY3,Q7SEK0,Q7RYI8	A2R163,A2R5A8	g6764.t1,g7939.t1,g3778.t1
Major intrinsic protein	IPR000425_PF00230	Cluster_1	0	1	1	1	2	1	1	2	1	1	1	7	1	4	3	3	1	1	3	3	3	2	2	2	2	6	3	P53386,O93938	Q7SGN1	A2R2Z1	g2451.t1,g16234.t1
Ubiquitin domain	IPR000626_PF00240	Cluster_1	12	2	2	3	1	3	2	3	3	3	3	4	1	3	3	3	3	3	3	3	3	3	4	4	4	3	3	P61864	P13117	A2QJB9,A5AA93,A2Q831	g14814.t1,g15931.t1,g9914.t1,g3660.t1
Initiation factor 2B-related	IPR000649_PF01008	Cluster_1	4	3	3	3	3	3	3	3	3	3	3	3	3	3	3	3	3	3	3	3	3	3	3	3	3	6	3	P14741,P32502,P12754	Q7RX32,Q7RXW3,Q871J1	A2RAX1,A2QQ20,A2R412	g5267.t1,g14620.t1,g4638.t1
RNA polymerase, alpha subunit	IPR000722_PF00623	Cluster_1	4	3	3	3	3	3	3	3	3	2	3	3	3	3	3	3	4	4	3	3	3	3	3	3	3	3	3	P10964,P04050,P04051	Q7RXJ6,Q7SDN0,Q7RWI3	A2QRS4,A2QU24,A2QAT7	g13214.t1,g3468.t1,g4710.t1
Glycoside hydrolase, family 16	IPR000757_PF00722	Cluster_2	3	0	0	0	0	0	1	2	2	2	4	5	0	3	4	4	3	4	1	2	4	3	1	10	2	3	3			A5AAF6,A2QAL7	g11928.t1
Indoleamine 2,3-dioxygenase	IPR000898_PF01231	Cluster_1	3	1	1	1	1	2	2	3	3	3	3	3	3	3	3	3	3	3	3	3	3	3	3	2	2	2	3	P47125	Q7S331,Q7S4S0,Q7S733	A2QU38,A2QYB5,A2QJI6	g5989.t1,g13055.t1,g11026.t1
Phospholipase C, phosphatidylinositol-specific , X domain	IPR000909_PF00388	Cluster_1	0	0	0	0	0	0	1	1	1	1	1	2	3	4	3	3	3	3	4	5	4	3	3	0	1	0	3		Q7S268,Q7SE08,Q7SBR2	A2QEJ2	g5790.t1,g4164.t1,g12974.t1
Peptidase M24, structural domain	IPR000994_PF00557	Cluster_1	5	2	2	2	2	2	3	3	3	3	3	3	3	3	3	3	3	3	3	5	3	2	3	3	1	2	3	P40051,P43590	Q7RWY1,Q7RXQ4,Q7S034	A2QKF6,A2QWZ0,A2QAW7	g2059.t1,g8867.t1,g12261.t1
Zn(2)-C6 fungal-type DNA-binding domain	IPR001138_PF00172	Cluster_16	0	2	5	0	0	0	1	1	1	2	3	0	1	1	3	3	3	3	7	3	3	1	3	0	0	0	3		Q7S3X5	A2R8V1	g1255.t1,g6303.t1,g11022.t1
Cytochrome b5-like heme/steroid binding domain	IPR001199_PF00173	Cluster_3	12	0	0	0	0	3	3	3	3	3	3	1	2	3	3	3	3	3	3	4	3	3	3	3	4	2	3		Q01285,Q7RX26	A2QC57,A2QC55,A2QTJ1	g14845.t1,g7780.t1,g7785.t1
Cytochrome b5-like heme/steroid binding domain	IPR001199_PF00173	Cluster_4	2	3	3	2	1	3	2	3	3	3	4	2	3	2	3	3	2	2	3	3	3	3	3	2	3	4	3	Q12091	Q7S981,Q7SC03,Q8NIX4	A2QHP2,A2R7R2,A2QAA1	g773.t1,g8983.t1,g1477.t1
Cytochrome b5-like heme/steroid binding domain	IPR001199_PF00173	Cluster_5	4	0	0	0	0	1	2	3	3	4	3	3	3	2	3	3	3	3	3	2	3	3	2	3	2	3	3		Q8X0J4,Q7S582,Q86ZG6	A2QIF1,A2QKI1,A5ABH5	g9531.t1,g15328.t1
Cullin, N-terminal	IPR001373_PF00888	Cluster_1	6	3	3	3	2	3	3	3	3	3	3	3	3	3	3	3	4	4	4	3	3	3	3	5	3	4	3	Q12018,P53202	Q7RZU1,Q7S9C8,Q7SG66	A2QRF8,A2R445,A2QVL7	g7669.t1,g589.t1,g8574.t1
Aspartic peptidase	IPR001461_PF00026	Cluster_3	0	0	0	0	0	0	0	0	0	0	0	0	2	3	3	3	5	4	2	4	3	2	4	0	0	0	3		Q7S6G0,Q7S0Y9		g4875.t1,g10652.t1,g13082.t1,g14200.t1
Peptidase S10, serine carboxypeptidase	IPR001563_PF00450	Cluster_2	0	0	0	0	0	0	3	5	4	2	3	5	1	3	1	3	3	2	1	4	3	3	2	0	0	0	3		Q7S216	A2QL86,A2R906,A2QH12,A2R9B3	g743.t1,g9484.t1
Chloride channel, voltage gated	IPR001807_PF00654	Cluster_1	2	3	4	3	1	3	3	3	3	3	2	4	3	3	3	3	4	4	4	3	4	3	4	2	2	4	3	P37020	Q7RYX3,Q7S9P2,Q7RYK8	A2R3F0,A2QCN3,A2QZE0	g11556.t1,g1863.t1,g15853.t1,g12973.t1
Clathrin/coatomer adaptor, adaptin-like, N-terminal	IPR002553_PF01602	Cluster_1	3	3	3	3	3	3	3	3	3	3	3	3	3	3	3	3	3	3	3	3	3	4	3	3	2	3	3	P36000,P27351,P46682	Q7S2Q5,Q7S8H6,Q7S9G9	A2RAW7,A2R770,A2R7T2	g5505.t1,g2956.t1,g3246.t1
Carbohydrate-binding WSC	IPR002889_PF01822	Cluster_1	0	0	0	0	0	0	2	0	0	0	0	1	4	3	3	3	3	3	3	3	7	7	2	3	0	0	3		Q7S7A9,Q7S2E3,Q7RVV6,Q7SF43		g6141.t1,g8674.t1
Glycosyl transferase, family 39	IPR003342_PF02366	Cluster_1	5	5	5	5	6	4	3	3	3	3	3	3	3	3	3	3	3	3	3	3	3	3	3	3	3	3	3	P33775,P31382,P47190,P46971,P52867,P42934	Q7SD53,Q7SH94,Q9P3D8	A2QPR4,A5ABN8,A2R8V5	g2321.t1,g534.t1,g9178.t1
Zinc/iron permease	IPR003689_PF02535	Cluster_2	0	0	0	0	0	0	3	2	1	2	2	3	3	3	1	1	3	3	3	3	3	3	3	0	0	0	3		Q7S6L6,Q7S268,Q7SFH1	A2R923	g728.t1,g7363.t1,g10270.t1
Domain of unknown function DUF221	IPR003864_PF02714	Cluster_1	2	3	3	3	3	2	3	4	3	3	2	3	3	2	3	3	3	5	2	4	3	3	4	2	1	2	3	Q12252,Q03516,Q07798	Q7SAG4,Q7SA72,Q7RWN3	A2R3B1,A2R6X5,A2QZF4	g185.t1,g11713.t1,g173.t1,g5272.t1
Pyridine nucleotide-disulphide oxidoreductase, dimerisation domain	IPR004099_PF02852	Cluster_1	5	3	2	2	3	2	2	2	3	2	2	2	2	2	3	3	3	3	3	3	2	2	2	4	2	2	3	P09624,P41921,Q02733	Q873E8,Q7S477	A2QNS6,A2R0R4,A2QGK8	g9281.t1,g4395.t1
Translation elongation factor EFTu/EF1A, C-terminal	IPR004160_PF03143	Cluster_1	7	3	3	2	2	3	3	4	3	3	3	3	3	2	3	3	3	3	3	3	3	3	3	3	3	3	3	P02994,P05453	Q01372,Q7S6P5,Q7RXK0	A2QW82,A2QWB0,A2RAZ0	g10461.t1,g1425.t1,g9192.t1
Translation elongation factor EFTu/EF1A, domain 2	IPR004161_PF03144	Cluster_1	7	3	3	3	3	4	3	3	3	3	3	3	3	3	3	3	3	3	3	3	3	3	3	4	1	2	3	P32324,P36048,P53893	Q96X45,Q7SB63,Q7SHP3	A2QD36,A2R3P3,A2R925	g15749.t1,g1865.t1,g7654.t1
Translation elongation factor EFTu/EF1A, domain 2	IPR004161_PF03144	Cluster_2	7	2	2	2	3	2	3	3	3	3	3	2	2	3	3	3	3	3	3	3	3	3	3	2	3	3	3	P02994,P05453,P32769	Q01372,Q7S6P5	A2QW82,A2QWB0,A2RAZ0	g10461.t1,g1425.t1,g9192.t1
Aminotransferase, class I/classII	IPR004839_PF00155	Cluster_1	5	3	3	3	3	3	3	4	4	4	3	3	3	3	3	3	3	3	3	3	3	3	3	3	3	4	3	P09950,P25045,P40970	Q7RVY5,Q7S0A8,Q7RXZ7	A2QQY0,A2RAN9,A2QLK3,A2R9H8	g2260.t1,g10035.t1,g13243.t1
Aminotransferase, class I/classII	IPR004839_PF00155	Cluster_2	2	3	3	2	2	2	3	6	6	4	6	3	2	3	2	3	2	2	6	6	3	3	3	2	2	3	3	P23542,Q01802	Q7S9X7,Q7SC43	A2QJA6,A2R099,A2QFM3,A2QTK1,A2R823,A2QFX5	g2959.t1,g3047.t1,g10331.t1
Anp1	IPR005109_PF03452	Cluster_1	2	4	3	3	3	3	3	3	3	3	3	4	3	3	3	3	3	3	3	3	3	3	3	0	0	0	3	P32629,P39107,P23642	Q7SDH5,Q7SAL7,Q871K2	A2R608,A2QHW3,A2QGZ3	g12814.t1,g4625.t1,g12836.t1
Carbamoyl-phosphate synthase, large subunit, N-terminal	IPR005481_PF00289	Cluster_1	5	2	1	2	3	4	3	5	4	5	5	3	2	3	2	3	4	5	3	6	4	3	3	3	4	2	3	P32528,P11154,P32327	Q7SHV6,Q7SI60	A2QI31,A2QN39,A2R562,A2QB42	g9150.t1,g586.t1,g10447.t1
Biotin carboxylase, C-terminal	IPR005482_PF02785	Cluster_1	5	2	2	2	3	4	4	5	4	5	5	4	2	3	2	3	4	5	3	6	4	3	3	4	4	2	3	P32528,P11154,P32327	Q7SHV6,Q7SI60	A2QI31,A2QN39,A2R562,A2QB42	g9150.t1,g586.t1,g10447.t1
General substrate transporter	IPR005828_PF00083	Cluster_12	4	1	2	2	1	2	1	2	2	2	0	3	1	3	3	3	3	3	3	5	3	0	1	4	2	2	3	P25297	Q7RVX9	A2QIP5,A2R2R7	g6655.t1
Heavy metal-associated domain, HMA	IPR006121_PF00403	Cluster_1	3	3	2	2	1	2	3	4	2	2	8	2	2	3	2	2	3	4	3	6	4	3	3	4	2	1	3	P38995	Q7SGS2,Q7RZE4	A2Q9J7,A2QDY5	g13551.t1,g2678.t1,g10204.t1
DNA-directed DNA polymerase, family B, exonuclease domain	IPR006133_PF03104	Cluster_1	2	3	3	3	3	3	3	3	3	3	3	3	3	3	3	3	3	3	3	3	3	3	3	3	3	5	3	P13382,P15436,P14284	Q7SBT9,Q8X0N7,Q8X1U8	A2QXN0,A2R6A0,A2QC72	g14762.t1,g15424.t1,g5153.t1
DNA-directed DNA polymerase, family B, multifunctional domain	IPR006134_PF00136	Cluster_1	5	3	6	3	3	3	3	3	3	3	3	3	3	3	3	3	3	3	3	3	3	3	3	3	3	5	3	P13382,P15436,P14284	Q7SBT9,Q8X0N7,Q8X1U8	A2QXN0,A2R6A0,A2QC72	g14762.t1,g15424.t1,g5153.t1
HAD-superfamily hydrolase, subfamily IIA	IPR006357_PF13344	Cluster_1	0	2	2	2	1	2	3	3	2	3	5	3	3	3	3	3	2	2	3	3	2	3	2	1	1	1	3	P36151	Q7S3U3,Q7SEV9,Q7S5M5	A2Q980,A2QDR7	g9722.t1,g13310.t1
Sel1-like	IPR006597_PF08238	Cluster_1	15	2	2	2	3	3	3	3	3	3	3	3	3	3	3	3	3	3	3	4	3	3	3	3	3	3	3	Q07622,P34226,P39000	Q7SG28,Q7S4X4,Q7SDE9	A2R064,A2QZI5,A2QY23	g9082.t1,g10001.t1,g14846.t1
Amidohydrolase 1	IPR006680_PF01979	Cluster_2	0	0	0	0	1	0	0	4	4	2	2	0	3	0	2	3	4	5	0	4	4	0	1	0	0	0	3	P40896	Q7S7D1,Q7S9E7,Q7SG23	A2R2V4,A2R3A1,A2QWP4,A2R5H9	g4460.t1
RNA polymerase Rpb1, domain 1	IPR007080_PF04997	Cluster_1	4	3	3	3	3	3	3	3	3	2	3	2	3	2	3	3	3	4	3	3	3	3	3	3	3	3	3	P10964,P04050,P04051	Q7RXJ6,Q7SDN0,Q7RWI3	A2QRS4,A2QU24,A2QAT7	g13214.t1,g3468.t1,g4710.t1
RNA polymerase Rpb1, domain 5	IPR007081_PF04998	Cluster_1	3	3	3	3	3	3	3	3	3	2	3	3	3	3	3	3	4	4	3	3	3	3	3	3	3	3	3	P10964,P04050,P04051	Q7RXJ6,Q7SDN0,Q7RWI3	A2QRS4,A2QU24,A2QAT7	g13214.t1,g3468.t1,g4710.t1
RNA polymerase Rpb1, domain 4	IPR007083_PF05000	Cluster_1	3	3	3	3	3	3	3	3	3	2	3	3	3	3	3	3	4	4	3	3	3	3	3	3	3	3	3	P10964,P04050,P04051	Q7RXJ6,Q7SDN0,Q7RWI3	A2QRS4,A2QU24,A2QAT7	g13214.t1,g3468.t1,g4710.t1
DNA-directed RNA polymerase, subunit 2, domain 6	IPR007120_PF00562	Cluster_1	5	3	3	3	3	3	4	3	3	3	3	3	3	3	3	3	3	3	3	3	3	3	3	3	3	3	3	P22138,P08518,P22276	O74633,Q7RYF4,Q9P6E7	A2QYC2,A2Q8V9,A2QVK7	g8280.t1,g4716.t1,g14942.t1
Histone core	IPR007125_PF00125	Cluster_2	3	1	2	2	1	3	2	2	2	2	2	3	2	2	3	3	2	3	3	3	3	2	3	4	1	6	3	P02309	P04914,Q7RX38	A2QCZ0,A2QRR3	g8565.t1,g10967.t1,g13209.t1
Transcription factor domain, fungi	IPR007219_PF04082	Cluster_8	0	5	1	0	4	1	0	5	3	5	3	2	2	2	2	4	3	2	6	8	3	4	4	0	1	0	3	P53338,P38157,P43551,Q06595	Q7SC85,Q9C2Q2	A2Q9Y9,A2QJF6,A2R4G1	g6294.t1,g7596.t1,g11642.t1,g722.t1
Transcription factor domain, fungi	IPR007219_PF04082	Cluster_12	0	0	0	0	0	0	2	6	4	4	3	1	1	1	3	3	5	5	3	8	3	2	3	0	0	0	3		Q7RZS5	A2QJI9,A2QRX0,A2QLQ3,A2R4C8	g9832.t1,g9984.t1,g14953.t1
Transcription factor domain, fungi	IPR007219_PF04082	Cluster_15	3	0	0	0	0	0	1	2	2	3	3	2	2	2	3	3	2	3	3	8	3	2	2	0	0	0	3		Q7RWF1,Q96UA7	A2QHR5,A2RAL0	g11935.t1,g15554.t1
Transferrin receptor-like, dimerisation domain	IPR007365_PF04253	Cluster_1	4	1	1	2	1	1	3	2	2	2	2	3	2	4	2	3	2	2	4	3	4	3	3	2	1	0	3	P47161	Q7SAE5,Q7SFY6	A2QD97,A2RAQ4	g13443.t1,g16169.t1,g5695.t1
Peptidase M28	IPR007484_PF04389	Cluster_1	4	3	2	2	1	1	3	5	2	2	2	3	2	4	2	3	2	2	4	3	4	3	3	2	1	0	3	P47161	Q7SAE5,Q7SFY6	A2QD97,A2RAQ4	g13443.t1,g15532.t1,g5695.t1
Peptidase M28	IPR007484_PF04389	Cluster_2	2	1	1	1	1	1	3	3	2	1	1	4	2	4	3	3	3	3	3	3	5	6	1	1	1	1	3	Q04033	Q7RW54,Q7RYC8	A2R2G1,A2R976	g14972.t1
SWIRM domain	IPR007526_PF04433	Cluster_1	11	4	4	4	5	4	3	2	3	3	3	3	3	3	3	3	3	3	2	3	3	3	3	2	2	2	3	Q02336,P43609,P32591,P28003,Q99326	Q7RYE8,Q7SAN7,Q7SHE4	A2QPS3,A2QD51,A2QMJ3	g12054.t1,g15548.t1,g1185.t1
RNA polymerase Rpb2, domain 2	IPR007642_PF04561	Cluster_1	5	3	3	3	3	3	3	3	3	3	3	3	3	3	3	3	3	3	3	3	3	3	3	3	2	3	3	P22138,P08518,P22276	O74633,Q7RYF4,Q9P6E7	A2QYC2,A2Q8V9,A2QVK7	g8280.t1,g4716.t1,g14942.t1
RNA polymerase, beta subunit, protrusion	IPR007644_PF04563	Cluster_1	6	3	3	3	3	3	3	3	3	3	3	3	3	3	3	3	3	3	3	3	3	3	3	3	2	3	3	P22138,P08518,P22276	O74633,Q7RYF4,Q9P6E7	A2QYC2,A2Q8V9,A2QVK7	g8280.t1,g4716.t1,g14942.t1
RNA polymerase Rpb2, domain 3	IPR007645_PF04565	Cluster_1	5	3	3	3	3	3	3	3	3	3	3	2	3	3	3	3	3	3	3	3	3	3	3	3	2	3	3	P22138,P08518,P22276	O74633,Q7RYF4,Q9P6E7	A2QYC2,A2Q8V9,A2QVK7	g8280.t1,g4716.t1,g14942.t1
Uncharacterised conserved protein UCP028846	IPR008313_PF06824	Cluster_1	2	1	1	1	0	1	1	1	1	1	1	3	3	5	2	2	3	3	3	2	3	1	1	1	1	0	3		Q7S5M4,Q7SEI8,Q7SGP4	A2QJY8	g8963.t1
Extracellular membrane protein, CFEM domain	IPR008427_PF05730	Cluster_2	0	0	0	0	0	0	3	2	2	2	2	1	3	2	2	4	3	4	2	4	4	3	2	1	0	3	3		Q7S923,Q7S5M9,Q9P3F4	A2RBD7,A2QLF4	g12488.t1,g9464.t1
TRP-like family	IPR010308_PF06011	Cluster_1	0	2	3	2	4	4	2	4	3	2	3	2	3	3	3	3	3	4	3	3	3	3	2	0	1	1	3	Q08967,P39719,P53121,Q08844	Q7S5Q8,Q7SF57,Q9HGS8	A2Q946,A2Q9T7,A2QFI9	g1651.t1,g11255.t1
Sulphate transporter	IPR011547_PF00916	Cluster_1	6	1	1	1	2	1	2	1	2	1	3	3	2	3	2	3	3	3	3	3	3	3	4	2	1	0	3	P38359,Q12325	P23622,Q7SGT5	A2R5K2,A2Q8G0	g1679.t1,g10927.t1,g11553.t1,g15143.t1
EF-hand domain pair	IPR011992_PF13499	Cluster_1	7	3	3	3	3	3	2	2	2	1	2	2	4	3	2	2	3	3	2	3	5	4	3	4	3	4	3	P06787,P06704,P53141	P61859,Q7S0X6,Q7S5W4,Q7S9P8	A2QMC8,A2QJG6	g7574.t1,g14057.t1,g1161.t1
Berberine/berberine-like	IPR012951_PF08031	Cluster_3	0	0	0	0	0	0	0	3	3	1	4	5	2	3	1	1	3	2	3	5	4	3	3	0	2	1	3		Q7RV07,Q7S1P7	A2R352,A2QH13,A2QBA2	g12883.t1,g3719.t1,g7999.t1
Histidine phosphatase superfamily, clade-1	IPR013078_PF00300	Cluster_1	7	3	3	4	3	3	3	3	2	3	3	3	3	3	3	3	3	3	3	3	3	3	4	2	2	3	3	P40433,P32604,Q06137	Q7S2P1,Q7S800,Q9P522	A2QMH3,A2R4F1	g986.t1,g13570.t1,g4055.t1,g11761.t1
6-phosphofructo-2-kinase	IPR013079_PF01591	Cluster_1	7	4	3	5	4	3	3	3	2	3	3	4	3	3	3	3	3	3	3	3	3	3	4	2	2	3	3	P40433,Q12471,P32604,Q06137	Q7S2P1,Q7S800,Q9P522	A2QMH3,A2R4F1	g986.t1,g13570.t1,g4055.t1,g11761.t1
Amidohydrolase 3	IPR013108_PF07969	Cluster_1	0	0	0	0	0	0	0	2	1	2	3	6	2	3	3	4	4	3	6	7	3	2	3	2	2	2	3		Q7RU99,Q7SES4	A2R6R0	g4804.t1,g956.t1,g12089.t1
Valyl/Leucyl/Isoleucyl-tRNA synthetase, class I, anticodon-binding	IPR013155_PF08264	Cluster_1	3	3	3	3	3	3	3	3	3	3	3	3	3	3	3	4	5	4	3	3	3	3	3	3	3	4	3	P09436,P48526,P07806	P28350,Q7SFC7,Q873K4	A2R8Q8,A2QRP6,A2QYJ6	g2887.t1,g14573.t1,g2873.t1
MIR motif	IPR016093_PF02815	Cluster_1	6	5	5	5	6	4	3	3	3	3	3	3	3	3	3	3	3	3	3	3	3	3	3	3	3	3	3	P33775,P31382,P47190,P46971,P52867,P42934	Q7SD53,Q7SH94,Q9P3D8	A2QPR4,A5ABN8,A2R8V5	g2321.t1,g534.t1,g9178.t1
Mitochondrial substrate/solute carrier	IPR018108_PF00153	Cluster_2	3	2	2	2	2	2	2	4	3	3	3	3	2	4	2	3	4	5	3	4	3	3	2	2	2	2	3	P23641,P40035	Q7SD41,Q9HE83	A2QB22,A2QES4,A2QCN5	g1063.t1,g15963.t1
Mitochondrial substrate/solute carrier	IPR018108_PF00153	Cluster_3	3	1	1	1	1	1	2	2	2	2	3	2	2	2	2	2	3	3	3	6	3	3	3	4	3	1	3	Q06143	P0C582,Q9P5U2	A2QBZ4,A2QVT1	g1452.t1,g5827.t1,g2618.t1
Mitochondrial substrate/solute carrier	IPR018108_PF00153	Cluster_4	2	1	1	1	1	1	1	3	2	2	4	2	3	3	3	4	3	4	3	4	4	3	2	0	1	0	3	Q03829	Q7S9Z1,Q7S8I9,Q96U23	A2QMP1,A2QQA3	g13297.t1,g12097.t1
Protein of unknown function DUF3405	IPR021822_PF11885	Cluster_1	0	0	0	0	0	0	1	1	1	2	6	3	4	2	3	3	3	3	3	3	3	4	1	0	2	0	3		Q7S7H5,Q7SC24,Q7S7K1,Q7SGS4	A2QQU2	g3757.t1
AMP-binding enzyme C-terminal domain	IPR025110_PF13193	Cluster_4	0	0	0	0	0	1	2	6	3	4	4	2	2	3	3	4	1	3	3	6	2	2	2	1	1	1	3		Q7S4Y7,Q7SI43	A2QND1,A2QLX4,A2QLI1	g1500.t1,g8860.t1
AMP-dependent synthetase/ligase	IPR000873_PF00501	Cluster_4	11	6	5	2	4	1	2	2	2	2	2	2	3	3	2	2	3	3	3	4	3	3	2	2	2	5	3	P30624,P39518,P39002,P47912	Q7RWZ6,Q7RZ92,Q9P5I9	A2R7Y1,A2QUT7	g8399.t1,g6263.t1
Zn(2)-C6 fungal-type DNA-binding domain	IPR001138_PF00172	Cluster_14	0	4	1	1	0	0	2	1	2	2	3	4	2	2	4	4	3	4	3	5	3	3	3	0	0	0	3		Q7S904,Q870Q2	A2QCF8,A2R275	g7168.t1,g1838.t1,g318.t1
Peptidase C2, calpain, catalytic domain	IPR001300_PF00648	Cluster_1	0	0	0	0	0	0	0	1	1	1	1	1	3	3	2	2	0	0	3	4	3	3	3	0	0	0	3		Q7RZW0,Q7S7N5,Q8NIS6	A2QVX3	g6003.t1,g753.t1,g14255.t1
V-ATPase proteolipid subunit C-like domain	IPR002379_PF00137	Cluster_1	4	2	2	2	2	2	2	3	3	4	3	2	2	3	2	4	3	3	4	3	3	3	2	2	1	2	3	P25515,P32842	Q9Y874,P31413	A2QDR4,A2QV20,A2QNB8	g8173.t1,g9744.t1
Acyltransferase 3	IPR002656_PF01757	Cluster_1	0	0	0	0	0	0	1	2	2	1	2	2	3	4	2	2	4	5	2	3	5	3	2	0	0	0	3		Q7S3L2,Q7SGP9,Q872B3	A2QTK3,A2QKX4	g9342.t1,g14659.t1
Homogentisate 1,2-dioxygenase	IPR005708_PF04209	Cluster_1	1	0	0	0	0	0	1	2	3	4	2	3	1	1	1	2	3	5	3	6	3	4	2	2	1	0	3		Q7S6U0	A5ABH8,A2QVP6,A2Q839	g1370.t1,g11742.t1
Ysc84 actin-binding domain	IPR007461_PF04366	Cluster_1	0	0	0	0	0	0	1	2	2	1	2	1	2	2	3	3	4	4	4	4	3	2	2	0	2	1	3		Q7S8X1,Q7S527	A2QFX9,A2R9B2	g340.t1,g914.t1
Homeobox KN domain	IPR008422_PF05920	Cluster_1	1	1	1	2	2	0	1	3	2	3	2	3	1	1	3	4	2	2	6	15	3	8	4	1	1	2	3	P41817,P53147	Q7S886	A2QB41,A2R109	g8358.t1,g6416.t1,g9478.t1,g13669.t1
Peptidase M43, pregnancy-associated plasma-A	IPR008754_PF05572	Cluster_1	0	0	0	0	0	0	2	1	1	2	1	2	2	2	1	3	3	10	2	5	5	3	2	0	3	0	3		Q7S5Z5,Q871C5	A2QPS1	g8984.t1,g11535.t1
Ammonium transporter AmtB-like domain	IPR024041_PF00909	Cluster_1	5	2	2	3	3	6	2	4	4	4	3	5	4	3	2	2	2	2	3	4	4	3	1	2	2	2	3	P40260,P41948,P53390	Q7S5K0,Q7S9Q2,Q7SEH0,Q8X0D3	A2QFG1,A2QQP1,A2QAI5,A2R2Y5	g3774.t1
Multicopper oxidase, type 1	IPR001117_PF00394	Cluster_3	0	0	0	0	0	0	0	4	5	3	5	2	0	4	2	2	3	4	4	3	5	0	1	0	2	0	3			A2QB28,A2QGL7,A2QKF1,A2QL49,A2QB61	g214.t1
Multi antimicrobial extrusion protein	IPR002528_PF01554	Cluster_1	3	4	4	3	2	2	1	2	2	2	3	3	3	3	1	1	3	3	5	5	3	2	1	2	1	0	3	Q05497,P38767	Q7S8R9,Q7SDR8,Q872B9	A2QRY0,A2R3Z0	g6400.t1
Peptidase S8A, DUF1034 C-terminal	IPR010435_PF06280	Cluster_1	0	0	0	0	0	0	1	0	0	0	0	2	1	7	3	3	6	6	2	5	2	3	1	2	1	0	3		Q7RZV0		g4081.t1
Protein kinase domain	IPR000719_PF00069	Cluster_8	0	0	0	0	0	0	0	1	0	2	0	12	3	2	3	3	0	1	6	20	5	2	0	0	0	0	3		Q7S8N2,Q7S8N1,Q9P676
Berberine/berberine-like	IPR012951_PF08031	Cluster_2	0	0	0	0	0	0	0	6	6	6	5	5	3	7	2	4	0	0	3	5	2	2	1	4	0	0	2.5		Q7SHH8,Q7S0U1,Q7SHH7	A2QTF5,A2QFR3,A2R9X1,A2QTE6,A2QS48,A2QH89	g1108.t1
Protein kinase domain	IPR000719_PF00069	Cluster_7	0	0	0	0	0	0	15	4	7	1	6	2	4	1	0	0	12	9	1	5	1	7	5	2	0	0	2.5		Q7SAU1,Q7S0N6,Q7S326,Q7SAU4	A2QX01,A2QAL9,A2QQ57,A2QUA6,A2QN11,A2QX98,A2QB94	g2479.t1,g9834.t1,g12969.t1,g2781.t1,g15016.t1
Putative cyclase	IPR007325_PF04199	Cluster_1	2	0	0	0	0	0	2	9	7	5	6	7	1	3	0	1	2	2	3	5	4	3	6	2	2	0	2.5		Q96UB0	A2QUD6,A2R226,A2QBD8,A2QR78,A2RBK5,A2QR26,A2QU93	g12242.t1,g14640.t1,g15124.t1,g14367.t1,g12559.t1,g13657.t1
Intradiol ring-cleavage dioxygenase, C-terminal	IPR000627_PF00775	Cluster_1	0	0	0	0	0	0	0	8	9	7	3	2	1	2	1	0	3	3	3	4	3	1	4	0	2	1	2.5		Q7SD19	A2QAB9,A2QDW8,A2QM39,A2QZJ6,A2QUC4,A2QA93,A2R054,A2R131,A2QL76	g152.t1,g5924.t1,g4065.t1,g5391.t1
Peptidase M35, deuterolysin	IPR001384_PF02102	Cluster_1	0	0	0	0	0	0	4	5	0	4	1	2	2	3	1	1	3	1	1	3	3	4	0	0	0	0	2.5		Q7RWL3,Q7S0N2
Glycoside hydrolase, family 7	IPR001722_PF00840	Cluster_1	0	0	0	0	0	0	0	3	2	3	2	5	4	5	2	2	0	0	2	3	6	6	4	8	0	8	2.5		Q7SA23,Q7S390,Q7RXC7,Q872Y1	A2QAI7,A2QPG2	g12857.t1,g838.t1,g828.t1,g8311.t1
Transcription factor domain, fungi	IPR007219_PF04082	Cluster_16	0	1	0	1	1	0	0	4	2	2	1	3	1	1	2	3	2	2	4	7	3	6	4	0	0	0	2.5	P35995	Q7S2U2	A2Q7N2,A2R1E2	g4687.t1,g13517.t1,g1443.t1,g7207.t1
Glucose-methanol-choline oxidoreductase, C-terminal	IPR007867_PF05199	Cluster_2	0	0	0	0	0	0	0	2	2	1	3	4	2	3	0	0	1	2	3	6	4	4	4	0	0	0	2.5		Q7S2V1,Q7S3S9	A2R134,A2R832	g3144.t1,g707.t1,g13673.t1,g9970.t1
Major facilitator superfamily	IPR011701_PF07690	Cluster_19	0	0	0	0	0	0	1	1	2	2	3	1	1	1	2	6	9	9	4	2	3	2	2	0	0	0	2.5		Q7S282	A2R6P9,A2R6D9	g5928.t1,g700.t1
Glycoside hydrolase, family 16	IPR000757_PF00722	Cluster_3	0	0	0	0	0	0	0	0	0	1	0	1	3	5	2	2	2	2	4	2	5	3	3	0	0	0	2.5		Q7S5Q4,Q7S3Q8,Q7RZ43		g1372.t1,g5201.t1,g6396.t1
Inositol monophosphatase	IPR000760_PF00459	Cluster_1	1	1	3	1	1	1	1	3	3	2	2	2	3	1	3	3	2	2	3	3	2	2	3	1	1	1	2.5	P32179	Q7S427,Q7RZE9,Q86ZI8	A2QWX7,A2R2G2,A2QKK1	g6449.t1,g6286.t1,g916.t1
Zn(2)-C6 fungal-type DNA-binding domain	IPR001138_PF00172	Cluster_12	0	0	0	0	0	0	0	4	7	7	10	2	3	2	1	2	2	1	3	6	3	3	2	0	2	0	2.5		Q7S248,Q7SE10,Q7SD75	A2R8B3,A2QMA2,A5ABA0,A2QZK8,A2R8R9,A2R8C5,A2RA85	g5436.t1,g7045.t1
Zn(2)-C6 fungal-type DNA-binding domain	IPR001138_PF00172	Cluster_27	0	1	2	1	1	0	0	1	0	0	1	0	1	0	3	6	3	2	4	5	1	0	0	1	0	0	2.5	P39001	Q7S4Q6
Aspartic peptidase	IPR001461_PF00026	Cluster_2	0	0	0	0	0	0	1	2	1	2	1	1	3	3	2	2	2	3	3	3	2	2	2	0	0	0	2.5		Q7RZM6,Q7SEW4,Q7SH13	A2R1R2	g1366.t1,g8602.t1
Helicase, C-terminal	IPR001650_PF00271	Cluster_5	2	1	1	1	1	2	2	3	2	3	2	3	2	2	2	2	2	4	3	6	3	3	3	2	3	2	2.5	P35187	Q7RXE8,Q7SDG4	A5AAL6,A2QWC5	g6996.t1,g16220.t1,g6228.t1
Stem cell self-renewal protein Piwi	IPR003165_PF02171	Cluster_1	2	0	1	0	0	0	3	3	3	2	3	8	2	3	3	3	2	3	2	3	2	2	3	7	0	3	2.5		Q8J276,Q9P8T1	A2QDC5,A2R8K3,A2QG96	g12423.t1,g5320.t1,g11460.t1
Glutamine synthetase, catalytic domain	IPR008146_PF00120	Cluster_1	2	0	0	0	0	1	3	6	3	2	2	2	2	1	1	1	3	3	3	3	2	3	2	3	1	2	2.5		Q7SG85,Q9C213	A2R2P3,A2R384,A2R4W6	g1135.t1,g9157.t1
Peptidase C14, caspase domain	IPR011600_PF00656	Cluster_1	7	2	1	1	1	1	1	3	3	3	2	2	2	2	2	3	3	2	5	8	3	2	3	5	1	1	2.5	Q08601	Q7S232,Q7S4N5	A2QU58,A2RB75,A2QWJ3	g5729.t1,g3807.t1,g9673.t1
DJ-1 domain, InhA-type	IPR025628_PF13278	Cluster_1	0	0	0	0	0	0	1	0	1	1	1	3	1	3	1	1	4	4	2	3	3	1	2	0	0	0	2.5		Q96U16	A2QPD3	g4463.t1,g10312.t1
Glycoside hydrolase family 31, N-terminal domain	IPR025887_PF13802	Cluster_1	1	1	1	1	1	1	1	3	2	4	3	4	3	2	2	3	3	3	2	3	2	2	3	2	1	2	2.5	P38138	Q7S3A8,Q7S1M6,Q8NIY3	A2QUJ7,A2QAC1	g123.t1,g9758.t1,g6354.t1
Sulfatase	IPR000917_PF00884	Cluster_2	0	0	0	0	0	0	1	1	0	1	7	1	0	0	2	3	5	6	6	6	1	2	0	0	0	0	2.5
Glycoside hydrolase, clan GH-D	IPR000111_PF02065	Cluster_1	0	0	0	0	0	0	0	3	5	3	1	3	0	4	3	4	2	2	2	2	4	5	2	2	1	1	2.5			A2R2S6,A2QL72,A2QEJ9,A2QWT3,A2Q7N1	g15412.t1,g6553.t1
Cys/Met metabolism, pyridoxal phosphate-dependent enzyme	IPR000277_PF01053	Cluster_1	2	2	2	2	3	2	2	2	2	2	4	3	2	3	2	3	2	2	2	5	3	3	2	3	2	1	2.5	P31373,P06106,P43623	Q96VU7,Q9P3D4	A2QUT4,A2R8X8	g4741.t1,g2313.t1
AMP-dependent synthetase/ligase	IPR000873_PF00501	Cluster_5	5	2	2	2	2	1	3	2	2	2	2	2	2	3	2	2	2	3	3	3	2	3	2	4	2	1	2.5	Q01574,P52910	P16929,Q7S7A6	A2QKJ0,A2QJ30	g4851.t1,g5814.t1
Zn(2)-C6 fungal-type DNA-binding domain	IPR001138_PF00172	Cluster_17	0	1	1	1	0	0	1	5	5	3	3	0	1	1	3	4	1	2	4	6	3	2	2	0	0	0	2.5		Q7RZS5	A2QJI9,A2QRX0,A2QLQ3,A2R4C8,A2R1J2	g9984.t1,g14953.t1
Zn(2)-C6 fungal-type DNA-binding domain	IPR001138_PF00172	Cluster_18	0	0	0	0	0	0	0	2	2	1	1	2	0	2	4	8	2	2	3	8	5	1	2	0	0	0	2.5			A2R1S9,A2QYU2	g14607.t1,g15796.t1
Citrate synthase-like	IPR002020_PF00285	Cluster_1	1	1	1	1	3	2	2	4	5	3	3	2	2	2	2	2	3	3	3	3	4	2	2	3	1	2	2.5	P00890,P08679,P43635	P34085,Q7SG82	A2QA25,A2R4X3,A2QSJ2,A2QTX2,Q9P8D6	g6243.t1,g16011.t1
Carbohydrate binding module family 20	IPR002044_PF00686	Cluster_1	0	0	0	0	0	0	1	1	1	4	3	3	3	3	1	3	1	1	2	2	3	4	2	2	0	0	2.5		P14804,Q7SCE9,Q7SDJ6	A2QHE1	g7071.t1,g8025.t1
Tyrosinase	IPR002227_PF00264	Cluster_3	0	0	0	0	0	0	1	0	0	0	0	2	3	3	2	2	1	1	2	3	5	3	2	0	0	0	2.5		P00440,Q7S218,Q7SFK3		g8280.t1,g5197.t1
Protease-associated domain, PA	IPR003137_PF02225	Cluster_2	3	1	1	2	0	2	0	2	2	2	2	3	1	3	2	1	2	2	3	3	3	3	2	2	1	0	2.5		Q7SFY6	A2QD97,A2RAQ4	g15532.t1,g5695.t1
Mycolic acid cyclopropane synthase	IPR003333_PF02353	Cluster_1	1	1	1	1	0	1	1	3	3	2	2	2	2	3	2	4	3	3	2	3	2	2	2	3	2	2	2.5		Q7SBV0,Q7S9B8	A2QG64,A2QCS0,A2R1C5	g8957.t1,g10313.t1
Triose-phosphate transporter domain	IPR004853_PF03151	Cluster_1	0	0	0	0	0	0	1	2	3	1	2	1	2	2	2	2	3	2	3	3	3	3	2	1	1	2	2.5		Q871P2,Q872T4	A2QGE2,A2QL85,A2QDX9	g2347.t1,g11426.t1
Platelet-activating factor acetylhydrolase	IPR005065_PF03403	Cluster_1	0	0	0	0	0	0	0	0	0	2	0	3	2	1	3	3	3	3	2	2	3	1	1	2	2	1	2.5		Q7SCR4,Q7S2B3		g7133.t1
Transcription factor domain, fungi	IPR007219_PF04082	Cluster_17	0	4	1	3	1	2	1	1	4	2	1	2	2	3	2	2	3	3	2	4	4	2	3	0	1	0	2.5	Q12139	Q7S8U3,Q9P6Z0	A2QZW6,A2QFM0,A2QG11,A2QMC6	g427.t1,g1660.t1,g5939.t1
DNA/RNA helicase, DEAD/DEAH box type, N-terminal	IPR011545_PF00270	Cluster_4	3	1	1	1	1	2	2	3	2	3	2	3	2	2	2	2	1	4	3	7	3	3	2	2	3	3	2.5	P35187	Q7RXE8,Q7SDG4	A5AAL6,A2QWC5	g6996.t1,g6228.t1
Thiamine pyrophosphate enzyme, C-terminal TPP-binding	IPR011766_PF02775	Cluster_1	3	3	3	3	5	2	2	6	4	2	3	3	2	1	2	4	2	3	4	7	2	3	2	1	1	0	2.5	Q06408,P06169,P16467,P26263,Q07471	P33287,Q7S4N8	A2Q7Q7,A5AA75,A2R228,A2QT68	g9374.t1,g15900.t1
Thiamine pyrophosphate enzyme, central domain	IPR012000_PF00205	Cluster_1	3	2	2	3	5	2	2	6	4	2	4	3	2	1	2	4	2	3	4	6	2	3	2	1	1	0	2.5	Q06408,P06169,P16467,P26263,Q07471	P33287,Q7S4N8	A2Q7Q7,A5AA75,A2R228,A2QT68	g9374.t1,g15900.t1
Thiamine pyrophosphate enzyme, N-terminal TPP-binding domain	IPR012001_PF02776	Cluster_1	3	3	4	3	5	2	2	6	4	2	4	3	2	1	2	4	2	3	4	7	2	3	2	1	1	0	2.5	Q06408,P06169,P16467,P26263,Q07471	P33287,Q7S4N8	A2Q7Q7,A5AA75,A2R228,A2QT68	g9374.t1,g15900.t1
AMP-binding enzyme C-terminal domain	IPR025110_PF13193	Cluster_3	5	2	2	2	2	1	2	2	2	2	2	2	2	3	2	2	2	3	3	3	2	3	2	3	2	1	2.5	Q01574,P52910	P16929,Q7S7A6	A2QKJ0,A2QJ30	g4851.t1,g5814.t1
Glucose-methanol-choline oxidoreductase, N-terminal	IPR000172_PF00732	Cluster_2	0	0	0	0	0	0	0	3	2	1	1	4	2	5	0	0	1	1	5	3	4	3	1	1	0	0	2.5		Q7RXM0,Q7S0Y1	A2QUZ0,A2QE39	g6899.t1
Peptidase S8/S53 domain	IPR000209_PF00082	Cluster_5	0	0	0	0	0	0	0	0	5	1	0	0	1	0	4	7	1	3	4	4	2	1	1	0	0	0	2.5		Q7SCG1	A2QCA5,A2R888,A2RB01,A2RAB7,A2R2N5	g13133.t1
Cys/Met metabolism, pyridoxal phosphate-dependent enzyme	IPR000277_PF01053	Cluster_2	1	1	1	1	3	1	2	3	2	1	1	1	3	2	2	2	3	4	3	3	2	2	1	1	1	1	2.5	P47164,Q12198,Q04533	P38675,Q7SD09,Q872Z1	A2QA31,A2QY34	g9265.t1
Peptidase M14, carboxypeptidase A	IPR000834_PF00246	Cluster_1	0	0	0	0	0	0	2	0	0	0	0	4	1	4	2	2	2	2	3	3	6	7	1	0	0	0	2.5		Q7S312		g12950.t1
Protease-associated domain, PA	IPR003137_PF02225	Cluster_3	9	0	0	0	0	0	0	0	0	0	0	1	1	5	1	1	3	3	2	2	3	5	1	2	1	4	2.5		Q7RZV0		g4081.t1
Glucose-methanol-choline oxidoreductase, C-terminal	IPR007867_PF05199	Cluster_3	0	0	0	0	0	0	0	2	2	1	1	4	2	5	0	0	1	1	5	3	4	3	1	1	0	0	2.5		Q7RXM0,Q7S0Y1	A2QUZ0,A2QE39	g6899.t1
Luciferase-like domain	IPR011251_PF00296	Cluster_1	0	2	2	2	0	6	0	6	2	4	4	2	2	1	4	3	1	1	2	10	3	3	0	0	1	0	2.5		Q7S525,Q7S520	A2QT72,A2R0M8
Multicopper oxidase, type 2	IPR011706_PF07731	Cluster_3	0	0	0	0	0	0	0	4	5	3	6	2	0	2	2	2	3	4	4	3	5	0	1	0	2	0	2.5			A2QB28,A2QGL7,A2QKF1,A2QL49,A2QB61	g214.t1
Multicopper oxidase, type 3	IPR011707_PF07732	Cluster_3	0	0	0	0	0	0	0	4	5	3	5	2	0	3	2	2	3	3	4	1	5	0	1	0	2	0	2.5			A2QB28,A2QGL7,A2QKF1,A2QL49,A2QB61	g214.t1
Protein of unknown function DUF4246	IPR025340_PF14033	Cluster_1	0	1	1	4	0	1	1	2	1	2	1	4	0	1	2	4	3	3	3	5	1	0	2	1	1	0	2.5			A2QFP2	g960.t1,g13474.t1
Glycoside hydrolase, family 3, N-terminal	IPR001764_PF00933	Cluster_2	0	6	1	1	0	1	0	4	3	6	5	2	1	2	2	2	1	1	9	24	4	5	9	5	0	0	2		Q7SG54	A2R989,A2QLQ2,A2QH25	g4002.t1,g8196.t1,g6005.t1,g9408.t1,g11886.t1,g1737.t1,g11617.t1,g3618.t1,g3814.t1
Glycoside hydrolase family 3 C-terminal domain	IPR002772_PF01915	Cluster_2	0	6	1	1	0	1	0	4	3	6	5	2	1	2	2	2	1	1	9	25	5	5	9	5	0	0	2		Q7SG54	A2R989,A2QLQ2,A2QH25	g4002.t1,g8196.t1,g6005.t1,g9408.t1,g11886.t1,g1737.t1,g11617.t1,g3618.t1,g3814.t1
Fibronectin type III-like domain	IPR026891_PF14310	Cluster_2	0	4	1	1	0	1	0	4	3	5	5	2	1	2	2	2	1	1	9	24	5	5	9	5	0	0	2		Q7SG54	A2R989,A2QLQ2,A2QH25	g4002.t1,g8196.t1,g6005.t1,g9408.t1,g11886.t1,g1737.t1,g11617.t1,g3618.t1,g3814.t1
Zn(2)-C6 fungal-type DNA-binding domain	IPR001138_PF00172	Cluster_15	0	1	1	1	0	1	1	3	5	4	5	3	0	1	2	2	2	1	1	3	2	3	6	0	0	0	2			A2RA34,A2QEF1,A2QT86,A2QJR9,A2QKZ7	g2882.t1,g3021.t1,g7679.t1,g7827.t1,g158.t1,g2603.t1
Peptidase G1	IPR000250_PF01828	Cluster_1	0	0	0	0	0	0	0	3	4	2	3	2	2	2	4	6	5	4	1	2	1	0	0	12	0	0	2		Q7S6X9,Q8NIY2	A2Q7F7,A2R370,A2R6E9,A2QM02
Signal transduction response regulator, receiver domain	IPR001789_PF00072	Cluster_1	0	0	0	0	0	0	0	1	3	7	3	4	1	1	2	2	1	1	6	3	3	4	0	0	0	0	2		Q7S1P5	A2QF79,A2R112,A2RA43
Tyrosinase	IPR002227_PF00264	Cluster_1	0	0	0	0	0	0	4	4	4	6	2	10	2	9	0	1	1	3	5	1	5	2	5	0	0	0	2		Q7S4B2,Q870S6	A2Q9V3,A2QUC2,A2QTR2,A2QFP6	g7238.t1,g8638.t1,g12658.t1,g13139.t1,g7177.t1
Hydantoinase/oxoprolinase	IPR002821_PF01968	Cluster_1	1	3	1	1	1	1	1	3	6	3	5	3	1	1	2	2	3	2	2	6	4	1	5	1	1	1	2	P28273	Q7S242	A2QQ54,A2Q997,A2QFL9,A2QZM5,A2R1Q7,A2QLC0	g14.t1,g8030.t1,g12381.t1,g6720.t1,g6299.t1
Histidine kinase-like ATPase, ATP-binding domain	IPR003594_PF02518	Cluster_1	0	0	0	0	0	0	0	5	3	7	4	4	1	1	2	2	1	1	6	3	3	4	0	0	0	0	2		Q7S1P5	A2QF79,A2R112,A2RA43
Signal transduction histidine kinase EnvZ-like, dimerisation/phosphoacceptor domain	IPR003661_PF00512	Cluster_1	0	0	0	0	0	0	0	4	3	7	4	3	1	1	2	2	1	1	5	3	3	4	0	0	0	0	2		Q7S1P5	A2QF79,A2R112,A2RA43
Hydantoinase B/oxoprolinase	IPR003692_PF02538	Cluster_1	1	3	1	1	1	1	1	4	7	5	6	4	1	1	2	2	3	2	2	6	4	1	5	1	1	1	2	P28273	Q7S242	A2QQ54,A2Q997,A2QFL9,A2Q7L1,A2QZM5,A2R1Q7,A2QLC0	g14.t1,g8030.t1,g6720.t1,g6299.t1,g15304.t1
Transketolase, N-terminal	IPR005474_PF00456	Cluster_1	2	2	1	3	2	2	1	3	2	3	4	2	1	2	2	2	1	1	2	5	2	2	5	1	1	0	2	P23254,P33315	Q7RV20	A2R395,A2QRM6	g3016.t1,g90.t1,g988.t1,g14365.t1,g8179.t1
Glycoside hydrolase, family 2, TIM barrel	IPR006103_PF02836	Cluster_1	0	1	0	0	0	0	0	2	1	4	2	5	2	4	0	1	1	1	4	6	3	2	5	0	0	0	2		Q7S1W5,Q7SEC4	A2Q7M5	g10078.t1,g135.t1,g9847.t1,g13659.t1,g6943.t1
Hydantoinaseoxoprolinase, N-terminal	IPR008040_PF05378	Cluster_1	1	3	1	1	1	0	1	3	5	3	5	3	1	1	2	2	3	2	2	6	4	1	5	1	1	1	2	P28273	Q7S242	A2QQ54,A2Q997,A2QFL9,A2QZM5,A2R1Q7	g14.t1,g8030.t1,g12381.t1,g6720.t1,g6299.t1
Fructosamine/Ketosamine-3-kinase	IPR016477_PF03881	Cluster_1	0	0	0	0	0	0	3	1	3	0	2	0	1	2	0	6	2	2	1	3	0	3	5	0	0	0	2		Q7SFF8	A2QB89,A2Q7P9,A2QV23	g6233.t1,g10363.t1,g5597.t1,g16076.t1,g10769.t1
Aconitase A/isopropylmalate dehydratase small subunit, swivel	IPR000573_PF00694	Cluster_1	3	2	2	2	2	2	2	4	4	3	2	2	2	2	2	3	2	2	3	3	2	2	4	2	2	2	2	P39533,P19414	Q7S4W0,Q9HEA5	A2QSF4,A2R842,A2QEH0,A2QU01	g306.t1,g78.t1,g10024.t1,g5485.t1
Aconitase/3-isopropylmalate dehydratase large subunit, alpha/beta/alpha	IPR001030_PF00330	Cluster_1	3	2	2	2	2	2	2	4	4	4	3	2	2	2	2	3	2	2	3	3	2	2	4	2	2	2	2	P39533,P19414	Q7S4W0,Q9HEA5	A2QSF4,A2R842,A2QEH0,A2QU01	g306.t1,g78.t1,g10024.t1,g5485.t1
NADH:flavin oxidoreductase/NADH oxidase, N-terminal	IPR001155_PF00724	Cluster_2	5	2	2	1	0	0	1	5	6	3	3	2	1	1	2	5	2	2	5	7	3	2	2	3	1	0	2		Q7SF03	A2R6R2,A2QAG2,A2QBV3,A2QEF9,A2QFV4,A2QM51	g11586.t1,g14496.t1
Peptidase S9, prolyl oligopeptidase, catalytic domain	IPR001375_PF00326	Cluster_2	2	0	0	0	0	0	1	2	3	2	2	3	1	2	2	2	2	2	1	1	3	1	4	1	0	1	2		Q7SDW5	A2QZF1,A2QTP5,A2R8S1	g22.t1,g3204.t1,g1655.t1,g10978.t1
Proline dehydrogenase	IPR002872_PF01619	Cluster_1	0	0	0	0	0	0	2	2	3	3	3	2	1	1	1	2	2	2	3	6	3	2	2	0	0	0	2		Q7SHG8	A2QWR7,A2Q7Q2,A2QNB4	g11655.t1,g15177.t1
Transketolase-like, pyrimidine-binding domain	IPR005475_PF02779	Cluster_1	2	2	1	3	2	1	1	3	2	3	4	2	1	2	2	2	1	1	2	4	2	2	4	1	1	0	2	P23254,P33315	Q7RV20	A2R395,A2QRM6	g90.t1,g988.t1,g14365.t1,g8179.t1
Transketolase, C-terminal	IPR005476_PF02780	Cluster_2	2	1	1	3	2	1	1	2	2	3	3	2	1	2	2	2	1	1	1	2	2	2	4	1	1	0	2	P23254,P33315	Q7RV20	A2R395,A2QRM6	g90.t1,g988.t1,g14365.t1,g8179.t1
Transcription factor domain, fungi	IPR007219_PF04082	Cluster_11	0	0	0	0	0	0	1	5	8	3	10	2	0	1	3	6	2	1	0	3	2	2	2	0	0	0	2			A2R404,A2QS29,A2QL88,A2QX47,A2QBJ7,A2QF30,A2R5L5,A2R525	g6858.t1,g9372.t1
Transcription factor domain, fungi	IPR007219_PF04082	Cluster_18	0	0	0	0	0	0	1	2	4	2	5	3	1	1	2	2	2	2	4	6	3	3	4	0	0	0	2		Q7S6Q4	A2QTB9,A2R045,A2QHN6,A2R6S6	g3068.t1,g3956.t1,g1376.t1,g10143.t1
Transcription factor domain, fungi	IPR007219_PF04082	Cluster_20	0	1	1	1	0	0	1	2	2	2	2	2	1	1	2	2	2	2	5	6	3	3	4	0	0	0	2		Q7SAG0	A2QXD7,A2QM36	g2488.t1,g5263.t1,g2553.t1,g11596.t1
Alcohol dehydrogenase GroES-like	IPR013154_PF08240	Cluster_6	0	2	1	1	1	1	2	4	3	5	2	3	2	1	1	2	2	4	2	7	2	1	2	1	2	1	2	P32771	Q7RV37,Q8X0U5	A2QV03,A2QF02,A2Q7G5	g10831.t1,g14289.t1
UbiA prenyltransferase family	IPR000537_PF01040	Cluster_1	1	1	1	1	1	1	1	1	3	2	2	3	1	1	2	2	1	2	2	1	2	2	1	4	1	2	2	P32378	Q9HE73	A2QEF5,A2Q7I9,A2QHK2	g10338.t1
Protein kinase domain	IPR000719_PF00069	Cluster_10	0	0	0	0	0	0	0	0	0	0	1	0	1	4	5	7	2	1	1	2	2	2	1	0	0	0	2		Q7SHL9		g8088.t1
AMP-dependent synthetase/ligase	IPR000873_PF00501	Cluster_6	1	0	0	0	0	0	2	2	2	2	2	2	2	2	2	2	3	3	2	2	2	2	3	2	2	0	2		Q7RXZ8,Q9HEI8	A2QQX9,A5AB71	g13240.t1,g4017.t1,g7722.t1
Thioesterase	IPR001031_PF00975	Cluster_1	0	0	0	0	0	0	0	7	3	4	2	2	1	2	1	2	4	4	3	1	6	2	1	0	3	0	2		Q7S736	A2QTH2,A2QH36,A2QUI2	g13622.t1
Zn(2)-C6 fungal-type DNA-binding domain	IPR001138_PF00172	Cluster_25	0	1	1	0	0	0	1	0	3	3	2	0	1	3	3	2	1	1	4	3	2	0	2	0	1	0	2		Q7SEM4	A2QPZ3,A2QAF4,A2QTX5	g12122.t1,g12795.t1
Dynamin, GTPase domain	IPR001401_PF00350	Cluster_2	0	0	0	0	0	0	4	4	2	2	1	4	1	4	2	4	4	5	1	2	1	0	2	0	0	0	2		Q7S3T2	A2QTG5,A5ABD6	g7064.t1,g3900.t1
Peptidase C12, ubiquitin carboxyl-terminal hydrolase 1	IPR001578_PF01088	Cluster_1	0	1	1	1	0	1	2	2	2	2	2	3	1	2	2	2	2	2	2	2	3	3	3	2	1	1	2		Q7S9T4	A2QFB2,A2QYM9	g2586.t1,g2966.t1,g3527.t1
Sodium/solute symporter	IPR001734_PF00474	Cluster_1	1	6	6	4	1	4	0	3	3	4	3	2	1	2	4	3	2	2	1	5	2	3	2	3	3	0	2	P33413	Q7S147	A2QZM3,A2R031,A2Q8C0	g9174.t1,g10825.t1
MaoC-like domain	IPR002539_PF01575	Cluster_1	2	1	1	1	1	1	2	2	2	3	2	3	2	2	2	2	2	2	2	4	2	4	3	2	2	3	2	Q02207	Q01373,Q7S2L1	A2RB23,A2R2J8	g11236.t1,g6426.t1,g5679.t1
Hydantoinase/oxoprolinase	IPR002821_PF01968	Cluster_2	0	1	0	1	0	0	2	2	2	1	0	3	1	1	1	3	2	3	2	5	3	1	3	1	0	0	2		Q7SFT5	A2QM08,A2QBI5	g7217.t1,g936.t1,g13322.t1
ABC transporter-like	IPR003439_PF00005	Cluster_6	0	0	0	0	0	1	1	1	0	1	0	2	1	2	2	2	2	3	1	3	2	2	1	0	1	0	2		Q7RZJ1		g1436.t1
2-nitropropane dioxygenase, NPD	IPR004136_PF03060	Cluster_1	0	0	0	0	0	0	2	3	2	4	2	4	2	2	2	2	3	4	2	2	3	2	3	3	1	0	2		Q7RUB8,Q7S7B7	A2QI52,A2R800	g9513.t1,g11239.t1,g11901.t1
Voltage-dependent anion channel	IPR004695_PF03595	Cluster_1	0	0	0	0	0	0	0	3	3	2	2	4	2	3	1	2	1	1	6	2	2	3	0	0	1	0	2		Q7S1A3,Q7S2V5	A2R8T9,A2R6J6,A2R2C8
Aminotransferase, class I/classII	IPR004839_PF00155	Cluster_5	2	3	2	2	2	2	2	3	4	5	1	1	2	3	2	3	2	1	2	5	2	2	3	4	2	1	2	P53090,P38840	Q7S0F9,Q9C2H6	A2QUB8,A2QD20,A2QBH1,A2R526	g5091.t1,g9511.t1,g14925.t1
Organic solute transporter Ost-alpha	IPR005178_PF03619	Cluster_1	2	1	1	1	1	1	2	1	3	2	2	3	2	3	2	3	2	2	2	2	3	1	2	2	1	5	2	P36142	Q7S9K5,Q7SAG3	A2QT96,A2R9A5,A2QD41	g5282.t1,g1872.t1
Fatty acid desaturase, type 1	IPR005804_PF00487	Cluster_1	2	2	2	2	0	1	2	2	3	2	3	2	2	2	2	2	1	2	2	2	2	3	2	1	1	2	2		Q7S008,Q7S463	A2QBE6,A2R491,A2QR87	g1704.t1,g3113.t1
Cupin 1	IPR006045_PF00190	Cluster_1	0	0	0	0	0	0	1	2	2	2	2	3	1	1	3	3	2	2	2	3	3	2	1	7	0	0	2		Q7SFG6	A2QFX7,A5ABZ4	g15948.t1
Transcription factor domain, fungi	IPR007219_PF04082	Cluster_14	0	0	0	0	0	0	0	2	7	7	8	2	0	2	1	4	1	1	2	5	3	2	3	0	1	0	2			A2QJ96,A2QMA2,A5ABA0,A2QZK8,A2R8R9,A2R8C5,A2RA85	g5436.t1,g15491.t1,g7914.t1
Hydantoinaseoxoprolinase, N-terminal	IPR008040_PF05378	Cluster_2	0	1	0	1	0	0	2	2	2	1	0	3	1	1	1	3	2	3	2	5	3	1	3	1	0	0	2		Q7SFT5	A2QM08,A2QBI5	g7217.t1,g936.t1,g13322.t1
Protein of unknown function DUF917	IPR010318_PF06032	Cluster_1	0	1	0	1	0	0	2	2	3	1	0	3	1	1	1	3	2	3	2	5	3	2	3	1	0	0	2		Q7SFT5	A2QM08,A2QM09,A2QBI5	g7217.t1,g936.t1,g13322.t1
Domain of unknown function DUF1212	IPR010619_PF06738	Cluster_1	7	1	1	2	1	1	1	4	3	3	4	2	1	1	1	1	2	3	2	2	2	2	1	5	1	2	2	P42946	Q7SES9	A2QT77,A2QU89,A2R1Y4	g9354.t1
Protein of unknown function DUF1446	IPR010839_PF07287	Cluster_1	0	0	0	0	0	0	2	4	3	2	1	5	1	0	0	2	2	2	1	6	2	6	3	0	0	0	2		Q7SA16	A2QRV1,A2QF51,A2QL47	g3.t1,g3979.t1,g7663.t1
Protein of unknown function DUF1479	IPR010856_PF07350	Cluster_1	0	2	1	0	0	1	1	4	3	1	1	1	2	2	1	1	2	2	3	8	3	3	4	2	1	0	2		Q7S5J7,Q7SG20	A2QMY2,A2R4C7,A2R4C5	g9617.t1,g10284.t1,g6869.t1,g8975.t1
Peptidase M20, dimerisation domain	IPR011650_PF07687	Cluster_1	6	0	0	0	0	0	1	6	5	2	3	2	1	3	1	1	2	2	3	8	0	2	0	1	1	0	2		Q870U8	A2R4W1,A2QYS9,A2QRU7,A2QAI2,A2QXG6
Thiamine pyrophosphate enzyme, C-terminal TPP-binding	IPR011766_PF02775	Cluster_3	0	0	0	0	0	0	1	3	2	1	2	2	1	1	2	2	2	3	2	1	1	2	3	1	0	0	2		Q7RWN4	A2R6V2,A2QD25	g8188.t1,g10141.t1,g12883.t1
Thiamine pyrophosphate enzyme, central domain	IPR012000_PF00205	Cluster_3	0	0	0	0	0	0	1	3	2	1	2	2	1	1	2	2	2	2	2	1	1	2	3	1	0	0	2		Q7RWN4	A2R6V2,A2QD25	g8188.t1,g10141.t1,g12883.t1
Thiamine pyrophosphate enzyme, N-terminal TPP-binding domain	IPR012001_PF02776	Cluster_3	0	0	0	0	0	0	1	3	2	1	2	2	1	1	2	2	3	3	2	1	1	2	3	1	0	0	2		Q7RWN4	A2R6V2,A2QD25	g8188.t1,g10141.t1,g12883.t1
Amino acid transporter, transmembrane	IPR013057_PF01490	Cluster_2	0	0	0	0	0	0	0	4	3	1	5	1	1	1	2	3	2	2	5	6	2	1	3	0	1	0	2		P38680	A2R6D4,A2R854,A2QTY1	g930.t1,g1406.t1,g14928.t1
SMP-30/Gluconolactonase/LRE-like region	IPR013658_PF08450	Cluster_1	0	0	0	0	0	0	0	7	3	2	1	3	1	2	1	1	3	2	4	4	3	1	3	1	1	0	2		Q7SHE0	A2QV39,A2QKZ8,A2QPX1	g12557.t1,g11683.t1,g2603.t1
Peptidase M1, membrane alanine aminopeptidase, N-terminal	IPR014782_PF01433	Cluster_1	2	3	1	2	2	3	2	2	2	2	2	2	2	2	2	2	2	2	2	3	2	2	1	2	1	1	2	P37898,P32454	Q7S416,Q7S394	A2QIL3,A2QUU3	g1033.t1
Copper amine oxidase, N3-terminal	IPR015802_PF02728	Cluster_1	0	0	0	0	0	2	3	4	5	3	4	1	0	1	1	3	3	2	2	6	2	2	5	0	0	0	2			A2QTC0,A2R1C2,A2QEF8,A2QFT7,A2QNN3	g12781.t1,g7172.t1,g8186.t1,g10795.t1,g12087.t1
Domain of unknown function DUF3815	IPR024528_PF12821	Cluster_1	0	1	1	2	1	1	1	4	3	3	4	2	1	1	1	1	2	3	2	2	2	2	1	1	1	2	2	P42946	Q7SES9	A2QT77,A2QU89,A2R1Y4	g9354.t1
ERAP1-like C-terminal domain	IPR024571_PF11838	Cluster_1	2	3	1	2	2	3	2	2	2	2	2	2	2	2	2	2	2	2	2	3	2	2	1	2	1	1	2	P37898,P32454	Q7S416,Q7S394	A2QIL3,A2QUU3	g1033.t1
Regulator of G protein signalling domain	IPR000342_PF00615	Cluster_5	0	0	0	0	0	0	0	1	1	0	0	1	0	2	3	3	2	2	1	1	2	2	0	0	0	0	2			A2QJP2
Transcription factor domain, fungi	IPR007219_PF04082	Cluster_34	0	0	0	0	0	0	0	0	2	1	1	1	2	0	2	2	2	1	2	2	0	1	0	0	0	0	2		Q7S0T5,Q7SGH7	A2QQU3,A2R5P6
C2 domain	IPR000008_PF00168	Cluster_1	2	0	0	0	0	0	1	1	0	1	1	2	2	2	2	2	4	2	2	2	1	1	1	2	3	1	2		Q7SGL9,Q9P5T8		g8010.t1
NUDIX hydrolase domain	IPR000086_PF00293	Cluster_1	1	1	1	1	1	1	1	3	1	2	1	1	2	1	2	2	3	3	1	2	2	2	2	1	1	1	2	P47173	Q7RX10,Q7SAL2	A2Q7W6	g3696.t1,g12843.t1
NUDIX hydrolase domain	IPR000086_PF00293	Cluster_3	0	0	0	0	0	0	0	3	1	1	1	1	2	2	2	2	2	3	2	2	2	2	2	0	0	0	2		Q7S674,Q7S0Z0	A2QAJ9	g1301.t1,g10642.t1
CRIB domain	IPR000095_PF00786	Cluster_1	13	1	2	2	3	2	1	2	2	2	2	1	2	2	2	2	3	3	2	2	2	2	2	4	3	2	2	P48562,Q12469,Q03497	Q7RZD3,Q7RYQ4	A2R9M9,A2QW94	g8618.t1,g8392.t1
Proton-dependent oligopeptide transporter family	IPR000109_PF00854	Cluster_1	0	0	0	0	0	0	1	2	2	2	2	2	0	3	1	1	2	2	2	2	3	2	2	1	1	1	2			A2QR32,A2QHF2	g11137.t1,g4144.t1
Aminotransferase, class V/Cysteine desulfurase	IPR000192_PF00266	Cluster_4	0	0	0	2	0	0	1	1	1	2	1	1	3	2	1	1	2	1	1	2	2	2	2	2	2	1	2		Q7S1C3,Q7SE17,Q9P3Q6	A2QIK9	g3786.t1,g6677.t1
Rab-GTPase-TBC domain	IPR000195_PF00566	Cluster_1	11	1	1	1	2	2	2	2	2	2	2	2	2	2	2	2	2	2	2	2	2	2	2	0	1	0	2	Q12344,Q04322	Q7RUP0,Q7S9U4	A2QJ75,A5AB01	g3560.t1,g809.t1
Dynamin central domain	IPR000375_PF01031	Cluster_2	4	2	2	2	2	3	2	2	2	2	2	2	2	2	2	2	2	2	2	2	2	2	2	2	1	2	2	P54861,P21576	Q7SDJ3,Q7S7H9	A2QHI2,A5AAF2	g10984.t1,g9492.t1
DNA mismatch repair protein MutS, C-terminal	IPR000432_PF00488	Cluster_1	2	2	2	2	2	2	2	2	2	2	2	2	2	2	2	2	2	2	2	2	2	2	2	2	2	2	2	P25336,Q03834	Q7SD11,Q7S4J6	A2QIC1,A2R1F6	g2628.t1,g1780.t1
HECT	IPR000569_PF00632	Cluster_1	6	2	2	2	2	2	2	2	2	2	2	2	2	2	2	2	2	2	2	2	2	2	2	2	2	2	2	P39940,Q03280	Q9P4Z1,Q7RV01	A2QQ28,A2QJ57	g811.t1,g7385.t1
Dihydroxy-acid/6-phosphogluconate dehydratase	IPR000581_PF00920	Cluster_1	2	1	1	1	1	1	2	3	4	2	2	2	2	2	2	2	2	2	2	3	2	2	2	2	2	1	2	P39522	Q7SBQ5,Q872F8	A2RAS2,A2QGU4,A2R373,A2RAB2	g2786.t1,g4496.t1
Translation elongation factor EFG, V domain	IPR000640_PF00679	Cluster_1	6	2	2	2	2	3	2	2	2	2	2	2	2	2	2	2	2	2	1	2	2	2	2	3	1	3	2	P32324,P36048	Q96X45,Q7SHP3	A2QD36,A2R925	g15749.t1,g1865.t1
Peptidase M41	IPR000642_PF01434	Cluster_1	4	3	3	3	3	3	2	2	2	2	2	2	2	2	2	2	2	2	2	2	2	2	2	2	1	2	2	P39925,P40341,P32795	Q7RVQ0,Q9HDH1	A2QIW5,A2QNU0	g6471.t1,g15379.t1
Ras-like guanine nucleotide exchange factor, N-terminal	IPR000651_PF00618	Cluster_1	8	1	1	1	1	2	2	3	3	3	3	2	2	2	2	2	2	2	2	2	2	1	2	2	2	2	2	P04821	Q7RYH5,Q7S0V9	A2QFY6,A2QHS5,A2R650	g12535.t1,g10852.t1
Target SNARE coiled-coil domain	IPR000727_PF05739	Cluster_1	4	2	1	1	2	3	1	1	1	0	1	2	2	2	2	2	2	2	2	2	2	2	2	2	1	1	2	P32867,P39926	Q7RVS5,Q9HEG8	A2QYG9	g10466.t1,g11980.t1
Elongation factor, GTP-binding domain	IPR000795_PF00009	Cluster_1	6	2	2	2	2	3	2	2	2	2	2	2	2	2	2	2	2	2	2	2	2	2	2	3	1	4	2	P32324,P36048	Q96X45,Q7SHP3	A2QD36,A2R925	g15749.t1,g1865.t1
Isocitrate lyase/phosphorylmutase	IPR000918_PF00463	Cluster_1	1	1	1	1	2	2	2	2	2	2	2	2	2	2	2	2	1	2	2	4	2	1	2	2	2	2	2	P28240,Q12031	P28299,Q7SG83	A2R073,Q2L888	g13262.t1,g16010.t1
Globin	IPR000971_PF00042	Cluster_1	0	1	3	1	1	1	0	2	2	2	3	1	2	1	2	2	4	4	2	2	2	2	2	1	0	0	2	P39676	Q7S074,Q7SDB4	A2RA35,A2R2Z2	g15582.t1,g6604.t1
Peptidase M24, structural domain	IPR000994_PF00557	Cluster_2	1	1	1	1	1	1	2	2	2	2	2	2	1	1	2	2	2	3	2	2	2	2	2	1	1	1	2	P38174	Q7S7L7	A2QAF9,A2QHX0	g191.t1,g1383.t1
Epsin domain, N-terminal	IPR001026_PF01417	Cluster_1	2	3	4	4	5	2	2	2	2	2	2	2	2	2	2	2	2	2	2	2	2	2	2	3	2	2	2	Q12518,Q05785,P47160,Q07872,Q03769	Q7S626,Q7SEF2	A2QP51,A2QLM3	g10265.t1,g14060.t1
Serine hydroxymethyltransferase	IPR001085_PF00464	Cluster_1	2	2	2	2	2	2	2	2	2	2	2	2	2	2	2	2	3	2	3	3	2	2	3	1	1	2	2	P37291,P37292	P34898,Q7S5N8	A2R7B7,A2QKJ2	g1937.t1,g4695.t1,g7758.t1
Band 7 protein	IPR001107_PF01145	Cluster_1	7	2	2	2	2	2	2	2	2	2	2	2	2	2	2	2	2	2	2	2	2	2	2	2	2	2	2	P40961,P50085	Q7SEN4,Q871J5	A2QRM3,A2QZF6	g4644.t1,g546.t1
Glycoside hydrolase, family 11	IPR001137_PF00457	Cluster_1	0	0	0	0	0	0	0	2	3	2	1	3	2	3	1	1	0	0	2	3	4	5	5	1	1	0	2		Q7SDQ1,Q871E8	A2QBA9,A2Q7I0,A2R4D1	g10677.t1,g10916.t1,g3083.t1,g9836.t1,g14573.t1
NADH:flavin oxidoreductase/NADH oxidase, N-terminal	IPR001155_PF00724	Cluster_3	0	0	0	0	0	0	0	5	3	1	4	1	1	1	3	2	2	2	4	5	2	1	1	0	2	3	2		Q870W3	A2R5I4,A2QKP9,A2QZB5	g7498.t1
Cytochrome b5-like heme/steroid binding domain	IPR001199_PF00173	Cluster_7	3	1	1	1	0	1	1	3	2	1	2	2	1	1	2	2	1	2	2	2	2	2	2	1	1	1	2		Q7S476	A2QNS0,A2R895	g8343.t1,g9279.t1
Glycoside hydrolase, family 18, catalytic domain	IPR001223_PF00704	Cluster_2	5	2	0	1	0	2	1	3	2	2	1	1	2	2	6	9	6	8	1	0	2	2	0	2	0	0	2		Q7SE00,Q7RYA7	A2QUK1,A2QUQ2
Lactate/malate dehydrogenase, N-terminal	IPR001236_PF00056	Cluster_1	3	3	3	2	3	2	2	2	3	3	3	2	2	2	2	2	2	2	2	3	2	2	2	2	2	2	2	P22133,P17505,P32419	Q7S1D6,Q7SBB2	A5ABV4,A2QX13,A2QMH9	g2219.t1,g2535.t1
Pyridine nucleotide-disulphide oxidoreductase, NAD-binding domain	IPR001327_PF00070	Cluster_1	3	1	2	1	3	1	1	3	2	2	2	2	2	2	2	3	2	2	2	2	3	1	2	2	2	1	2	P40215,Q07500,P32340	Q7RXQ5,Q7S2Y9	A2QQZ5,A2QAR7	g8516.t1,g15798.t1
Pyridine nucleotide-disulphide oxidoreductase, NAD-binding domain	IPR001327_PF00070	Cluster_2	1	1	1	0	0	0	0	0	2	0	2	3	0	2	1	3	2	1	3	6	3	2	1	0	0	0	2			A2QFQ4,A2QL68	g4195.t1
Pyridine nucleotide-disulphide oxidoreductase, NAD-binding domain	IPR001327_PF00070	Cluster_3	2	1	1	1	2	1	1	1	2	0	1	1	1	1	2	2	2	2	2	2	1	1	1	1	1	1	2	P09624,Q02733	Q7S477	A2QNS6,A2R0R4	g9281.t1
Glycoside hydrolase, family 1	IPR001360_PF00232	Cluster_1	0	0	0	0	0	0	0	2	1	2	2	1	1	1	2	2	2	2	2	4	1	2	3	2	0	0	2		Q7RVN8	A2QGL6	g3617.t1,g9795.t1,g2274.t1
Adenosine/AMP deaminase domain	IPR001365_PF00962	Cluster_1	0	0	0	0	0	0	1	2	1	2	2	2	2	2	3	3	2	2	2	3	2	3	1	1	1	0	2		Q7RZG8,Q8NIZ8	A2QSD0	g5326.t1
Peptidase S9, prolyl oligopeptidase, catalytic domain	IPR001375_PF00326	Cluster_1	3	2	2	2	2	1	2	2	1	2	1	2	1	2	1	1	1	2	2	2	2	2	2	1	1	1	2	P18962,P33894	Q7SHU8	A2QEK7	g15401.t1,g1090.t1
Ubiquitin carboxyl-terminal hydrolases family 2	IPR001394_PF00443	Cluster_1	5	3	3	3	5	2	3	2	2	2	2	2	2	2	2	2	2	2	2	2	2	2	2	2	2	2	2	P36026,P39538,P32571,P39944,P40453	Q7RWU7,Q870P1	A2QWA0,A2QBW2	g15630.t1,g10468.t1
Ubiquitin carboxyl-terminal hydrolases family 2	IPR001394_PF00443	Cluster_2	4	1	1	1	1	1	2	2	2	1	1	2	2	2	2	2	2	2	2	2	2	2	2	1	1	3	2	P50101	Q7RZP4,Q96U79	A2QUF5,A2QZ56	g8919.t1,g6820.t1
Dynamin, GTPase domain	IPR001401_PF00350	Cluster_1	4	2	2	2	2	3	2	1	2	2	2	2	2	2	2	2	2	2	2	2	2	2	2	2	1	2	2	P54861,P21576	Q7SDJ3,Q7S7H9	A2QHI2,A5AAF2	g10984.t1,g9492.t1
Oxidoreductase FAD/NAD(P)-binding	IPR001433_PF00175	Cluster_1	2	0	0	0	0	0	0	3	3	1	1	1	1	4	2	2	2	2	2	3	5	1	1	5	0	0	2		Q7S8E0	A2R7A3,A2QLV1,A2Q966	g10673.t1
Oxidoreductase FAD/NAD(P)-binding	IPR001433_PF00175	Cluster_4	0	0	0	0	1	0	0	2	2	2	3	1	2	0	2	2	3	2	2	2	1	1	2	1	0	0	2	P39676	Q7S074,Q7SDB4	A2RA35,A2R2Z2	g15582.t1,g6604.t1
Bacterial transferase hexapeptide repeat	IPR001451_PF00132	Cluster_1	2	0	1	1	1	2	2	3	4	3	4	3	2	2	1	2	1	1	2	1	4	5	3	0	1	2	2	P40892	Q870Q2,Q872M2	A2QBC8,A2QZ53,A2R272,A2QDH9	g1278.t1,g8659.t1,g3596.t1
Bacterial transferase hexapeptide repeat	IPR001451_PF00132	Cluster_2	4	2	2	2	1	2	2	2	2	2	2	2	2	2	2	2	2	2	2	2	2	2	2	0	0	3	2	P41940	Q7RVR8,Q7S2E1	A2QIW7,A2QVR6	g6905.t1,g10479.t1
Bromodomain	IPR001487_PF00439	Cluster_1	7	1	1	1	2	1	1	1	1	1	1	1	2	2	2	2	2	2	2	2	2	2	2	2	2	1	2	P35817,Q07442	Q7SBY5,Q7S8S6	A2QJ81	g9688.t1,g15693.t1
Ribonuclease T2-like	IPR001568_PF00445	Cluster_1	2	2	3	1	1	2	1	2	2	2	2	2	0	2	3	3	1	2	2	1	2	2	0	2	2	1	2	Q02933		A5AA90,A2QA87
Myosin head, motor domain	IPR001609_PF00063	Cluster_1	8	0	0	0	0	2	2	2	2	2	2	1	1	2	2	2	2	2	2	3	2	2	2	1	1	2	2		Q7RX26	A2QC57,A2QC55	g7780.t1,g7785.t1
Helicase, C-terminal	IPR001650_PF00271	Cluster_6	2	2	3	2	3	2	3	3	2	2	3	3	3	3	2	2	2	2	2	2	2	2	2	2	3	3	2	P32639,P51979,P53327	Q7S600,Q7SH44,Q7S8K0	A2R8R8,A2R365	g414.t1,g2179.t1
Helicase, C-terminal	IPR001650_PF00271	Cluster_8	2	2	2	2	2	3	1	2	2	2	2	2	2	2	2	2	2	2	2	2	2	2	2	2	2	3	2	P47047,P35207	Q7SHE9,Q873J5	A2R7X2,A5AAL0	g782.t1,g13939.t1
WD40 repeat	IPR001680_PF00400	Cluster_2	3	3	2	2	3	2	2	2	2	2	2	2	2	2	2	2	2	2	2	2	2	2	2	4	2	2	2	P50082,P26309,P53197	Q7SG04,Q7S7C3	A2QAU1,A2QEQ9	g7562.t1,g15065.t1
Kinesin, motor domain	IPR001752_PF00225	Cluster_1	5	1	1	1	0	1	2	2	2	2	2	2	2	2	2	2	2	2	2	2	2	2	2	1	1	2	2		Q7S784,Q9C2M3	A2R5D8,A2R411	g13103.t1,g210.t1
Signal transduction response regulator, receiver domain	IPR001789_PF00072	Cluster_3	4	0	0	0	0	0	1	1	1	1	1	2	2	2	2	2	2	2	2	2	2	2	2	0	1	0	2		Q7RWB9,Q7SDE1	A2QDW3	g2351.t1,g2732.t1
Guanine-nucleotide dissociation stimulator CDC25	IPR001895_PF00617	Cluster_1	9	1	1	1	1	2	2	4	3	3	3	2	2	2	2	2	2	2	2	2	2	1	2	3	2	1	2	P04821	Q7RYH5,Q7S0V9	A2QFY6,A2QHS5,A2R650	g12535.t1,g10852.t1
Protein phosphatase 2C (PP2C)-like domain	IPR001932_PF00481	Cluster_1	2	1	1	1	1	1	1	2	2	1	2	2	1	1	2	2	3	3	2	3	2	1	1	2	1	1	2	Q12511	Q7RV65	A2QBM6,A2RB88	g10896.t1
Peptidase M18	IPR001948_PF02127	Cluster_1	2	3	3	2	2	3	2	2	2	2	2	2	2	2	2	2	2	2	2	2	2	2	2	1	1	1	2	P14904,P38821	Q7RYK7,Q9HE85	A2QER1,A2QUN5	g7116.t1,g15848.t1
Glutaredoxin	IPR002109_PF00462	Cluster_1	4	3	4	2	5	2	2	2	2	2	2	2	2	2	2	2	2	2	2	2	2	1	2	2	2	2	2	P25373,P17695,P38068,Q12438,Q05926	Q7SGE8,Q9P718	A2QPY2,A2RAY5	g11483.t1,g4747.t1
Glutaredoxin	IPR002109_PF00462	Cluster_2	2	2	2	2	3	2	2	2	2	2	2	2	2	2	2	2	2	2	3	2	2	2	2	2	2	2	2	Q03835,P32642,Q02784	Q7SDJ8,Q871I1	A2R5A2,A2QHK0	g228.t1,g4765.t1
UDP-glucuronosyl/UDP-glucosyltransferase	IPR002213_PF00201	Cluster_2	0	0	0	0	0	0	0	0	1	1	0	0	1	5	1	1	2	2	2	2	5	0	1	0	0	0	2		Q7SFJ4	A2QLG8	g7605.t1
Aminoacyl-tRNA synthetase, class Ia	IPR002300_PF00133	Cluster_1	2	2	2	2	2	2	2	2	2	2	2	2	2	3	2	2	3	3	2	2	2	2	2	2	2	3	2	P09436,P48526	Q7SFC7,Q873K4	A2QRP6,A2QYJ6	g2887.t1,g14573.t1
Aminoacyl-tRNA synthetase, class II (G/ H/ P/ S), conserved domain	IPR002314_PF00587	Cluster_1	4	2	2	2	2	2	1	2	2	2	2	2	2	2	2	2	2	2	2	2	2	2	2	2	2	2	2	P07284,P38705	Q7SBY2,Q7RWF9	A2QDX2,A2R9R6	g3270.t1,g13966.t1
Aminoacyl-tRNA synthetase, class II (G/ H/ P/ S), conserved domain	IPR002314_PF00587	Cluster_2	2	2	2	2	2	2	2	2	2	2	2	2	2	2	2	2	2	2	2	2	2	2	2	1	2	1	2	P04801,P07236	Q7S4U7,Q7SFW6	A2QAC7,A2Q9Y1	g9648.t1,g6500.t1
Formyl transferase, N-terminal	IPR002376_PF00551	Cluster_1	1	1	1	1	1	1	1	2	2	2	2	2	2	2	2	2	2	2	2	2	2	2	2	1	2	1	2	P04161	Q7S145,Q7SD96	A2QC90,A2QAI6	g1912.t1,g4188.t1
Peptidase S9B, dipeptidylpeptidase IV N-terminal	IPR002469_PF00930	Cluster_1	2	2	2	2	2	1	2	2	1	2	1	2	1	2	1	1	1	2	2	2	2	2	2	1	1	1	2	P18962,P33894	Q7SHU8	A2QEK7	g15401.t1,g1090.t1
Inorganic polyphosphate/ATP-NAD kinase, predicted	IPR002504_PF01513	Cluster_1	3	1	1	1	2	2	2	2	2	2	2	2	2	2	2	2	2	2	2	2	2	2	2	1	1	1	2	P21373,P32622	Q7SEG1,Q9C2P6	A2R436,A2QH01	g5673.t1,g13105.t1
Polysaccharide deacetylase	IPR002509_PF01522	Cluster_1	0	0	0	0	0	0	1	1	1	1	1	6	0	4	2	2	1	2	4	2	7	4	2	0	0	0	2			A2QVC6	g9858.t1,g12938.t1
Mg2+ transporter protein, CorA-like/Zinc transport protein ZntB	IPR002523_PF01544	Cluster_1	5	2	2	3	3	2	2	4	3	4	4	2	1	2	2	2	2	2	2	2	3	3	2	2	2	2	2	Q08269,P43553,P35724	Q7SEN2	A2Q7U2,A2QKL8,A2R9N7	g571.t1,g2199.t1
Clathrin/coatomer adaptor, adaptin-like, N-terminal	IPR002553_PF01602	Cluster_2	3	2	2	2	2	2	2	2	2	2	2	2	2	2	2	2	2	2	2	2	2	2	2	2	2	2	2	Q12028,P38065	Q9C2C8,Q9P3H7	A2Q805,A2R2F3	g7571.t1,g14830.t1
Glycoside hydrolase, family 12	IPR002594_PF01670	Cluster_1	0	0	0	0	0	0	0	2	3	1	2	4	0	3	1	2	0	0	2	3	3	4	2	2	0	0	2			A2QH44,A2Q877,A2R322	g1551.t1,g9590.t1
Methionine synthase, vitamin-B12 independent	IPR002629_PF01717	Cluster_1	0	0	0	0	0	0	0	1	3	1	2	2	2	2	2	2	1	1	2	2	2	0	1	3	1	0	2		Q7S0I6,Q872R4	A2QDP2,A2Q965,A2R310	g9971.t1
Patatin/Phospholipase A2-related	IPR002641_PF01734	Cluster_1	2	2	2	2	3	1	2	2	2	1	2	2	2	2	2	2	2	2	2	2	2	2	2	0	0	0	2	P40308,P36165,Q12043	Q7S285,Q7SEL9	A2QIE4,A2QPY4	g14515.t1,g5872.t1
Nop domain	IPR002687_PF01798	Cluster_1	4	2	2	2	2	2	2	2	2	2	2	2	2	2	2	2	2	2	2	2	2	2	2	2	2	2	2	Q12499,Q12460	Q7S0H3,Q8X066	A2QE38,A2R7C9	g6250.t1,g3657.t1
MOZ/SAS-like protein	IPR002717_PF01853	Cluster_1	5	2	2	2	2	3	2	2	2	2	2	2	2	2	2	2	2	2	2	2	2	2	2	3	3	3	2	Q08649,P34218	Q7S9B6,Q7S627	A2QJ44,A2QFA7	g4824.t1,g8950.t1
FAD-binding, type 1	IPR003097_PF00667	Cluster_1	2	0	0	0	0	0	0	3	3	1	1	1	1	4	2	2	2	2	2	3	5	1	1	5	0	0	2		Q7S8E0	A2R7A3,A2QLV1,A2Q966	g10673.t1
Peptidase S16, lon N-terminal	IPR003111_PF02190	Cluster_1	4	2	2	1	1	2	2	2	2	2	2	2	2	2	2	2	2	2	2	2	2	2	2	1	2	2	2	P36775	Q7SA85,Q7S8C4	A2QCJ2,A2RAF6	g1882.t1,g349.t1
Dynamin GTPase effector	IPR003130_PF02212	Cluster_1	4	2	2	2	2	3	2	2	2	2	2	2	2	2	2	2	2	2	2	2	2	2	2	2	1	2	2	P54861,P21576	Q7SDJ3,Q7S7H9	A2QHI2,A5AAF2	g10984.t1,g9492.t1
S1/P1 nuclease	IPR003154_PF02265	Cluster_1	0	0	0	0	0	0	0	1	0	0	1	1	2	1	2	2	3	3	1	1	2	1	1	1	0	0	2		Q7S8Q5,Q870T1		g10734.t1
Methylenetetrahydrofolate reductase	IPR003171_PF02219	Cluster_1	3	2	2	2	2	2	2	2	2	2	2	2	2	2	2	2	2	2	2	2	2	2	2	2	2	2	2	P46151,P53128	Q7S830,Q7S2B6	A2QUJ5,A2QCE3	g15250.t1,g6412.t1
Trehalose-phosphatase	IPR003337_PF02358	Cluster_1	9	2	2	2	3	2	2	3	3	2	4	2	2	2	2	2	2	2	2	2	2	2	0	2	2	2	2	P31688,P38426,P38427	Q7SFT8,Q7RX47	A2QPA0,A2R191,A2QY17
JmjC domain	IPR003347_PF02373	Cluster_1	3	3	3	3	3	3	2	2	2	2	2	2	2	2	2	2	2	2	2	2	2	2	2	1	2	2	2	Q03833,P47156,P39956	Q7RW47,Q9C2J9	A2QR69,A2QUI9	g2927.t1,g5953.t1
ABC transporter-like	IPR003439_PF00005	Cluster_5	5	2	2	2	2	2	2	2	2	2	2	2	2	2	2	2	2	2	2	2	2	2	2	2	2	2	2	P41909,P34230	Q7SD69,Q9P6C3	A2QRE9,A2Q8A9	g10574.t1,g1720.t1
Transferase	IPR003480_PF02458	Cluster_1	0	0	0	0	0	0	0	2	1	1	3	1	0	2	2	5	2	3	1	5	1	0	1	0	0	0	2			A2QRA6	g13448.t1
Histidine kinase-like ATPase, ATP-binding domain	IPR003594_PF02518	Cluster_2	5	0	0	0	0	0	1	1	1	1	1	2	2	2	2	2	2	2	2	2	2	2	2	0	1	0	2		Q7RWB9,Q7SDE1	A2QDW3	g2351.t1,g2732.t1
Signal transduction histidine kinase EnvZ-like, dimerisation/phosphoacceptor domain	IPR003661_PF00512	Cluster_2	5	0	1	0	0	0	1	1	1	1	1	2	2	2	2	2	2	2	2	2	2	2	2	0	1	0	2		Q7RWB9,Q7SDE1	A2QDW3	g2351.t1,g2732.t1
	IPR003781_PF02629	Cluster_1	2	1	1	1	1	1	1	2	2	2	2	2	2	2	2	2	2	2	3	2	2	1	1	1	2	1	2	P53598	Q9P727,Q7SDJ1	A2QQL8,A2R9J7	g14551.t1
Domain of unknown function DUF202	IPR003807_PF02656	Cluster_1	11	2	2	2	3	2	1	2	2	1	2	2	1	2	2	2	2	2	2	2	2	2	2	1	1	1	2	P43585,Q02725,P47075	Q96U59	A2QPK9,A2QZF2	g6259.t1,g6732.t1
Taurine catabolism dioxygenase TauD/TfdA	IPR003819_PF02668	Cluster_3	2	2	2	2	1	2	2	2	2	2	2	2	2	2	2	2	2	2	2	3	2	2	2	2	2	2	2	P23180	Q96UB1,Q7S3G2	A2RB24,A2R5A1	g5934.t1,g3285.t1
FAD binding domain	IPR003953_PF00890	Cluster_2	3	2	2	1	2	0	1	2	2	2	1	1	2	2	1	1	1	1	2	2	2	2	3	1	1	2	2	P32614,P21375	Q7S508,Q7SHN7	A2R8H3,A2QLF3	g15857.t1,g14870.t1,g6514.t1
ATPase, AAA-type, core	IPR003959_PF00004	Cluster_3	6	2	2	2	1	2	2	2	2	2	2	2	2	3	2	2	2	2	2	2	2	2	2	2	2	3	2	P36775	Q7SA85,Q7S8C4	A2QCJ2,A2RAF6	g1882.t1,g349.t1
ATPase, AAA-type, core	IPR003959_PF00004	Cluster_5	3	2	2	2	2	2	2	2	2	2	2	2	2	2	2	2	2	2	2	2	2	2	2	2	1	2	2	P31539,P33416	P31540,Q7SDI0	A2QQR8,A2QAZ7	g8583.t1,g3735.t1
ATPase, AAA-type, core	IPR003959_PF00004	Cluster_7	0	1	0	2	2	2	1	2	2	2	2	2	2	2	2	2	2	1	2	2	2	2	2	1	1	1	2	P40348,P38629	Q7SH42,Q872Q7	A2QER5,A2R6X9	g2177.t1,g7618.t1
Dak kinase	IPR004006_PF02733	Cluster_1	0	3	2	1	2	3	1	1	1	1	0	2	2	2	3	3	2	2	2	3	2	3	2	1	1	0	2	P54838,P43550	Q7RZ73,Q9C253	A2R443	g12251.t1,g7100.t1
DhaL domain	IPR004007_PF02734	Cluster_1	1	3	2	1	2	3	1	1	1	1	0	2	2	2	3	3	2	2	2	4	2	3	2	1	1	1	2	P54838,P43550	Q7RZ73,Q9C253	A2R443	g12251.t1,g7100.t1
Cation-transporting P-type ATPase, N-terminal	IPR004014_PF00690	Cluster_4	2	1	1	1	1	1	2	2	2	2	2	2	2	2	2	2	2	2	2	2	2	2	2	2	2	2	2	P13586	Q9UUX9,Q9UUY0	A2RBD0,A2QFG4	g488.t1,g5890.t1
TGS	IPR004095_PF02824	Cluster_1	2	2	2	2	2	2	2	2	2	2	2	2	2	2	2	2	2	2	2	2	2	2	2	2	2	1	2	P39729,P53295	Q7RYS1,Q8X0M9	A2RAU8,A2R9C1	g11855.t1,g6067.t1
Anticodon-binding	IPR004154_PF03129	Cluster_1	2	2	2	2	2	2	2	2	2	2	2	2	2	2	2	2	2	2	2	2	2	2	2	1	2	1	2	P04801,P07236	Q7S4U7,Q7SFW6	A2QAC7,A2Q9Y1	g9648.t1,g6500.t1
Coenzyme A transferase family I	IPR004165_PF01144	Cluster_1	0	1	1	0	0	1	1	3	3	3	2	3	2	1	2	2	2	2	2	3	2	3	2	1	1	1	2		Q7S3H2,Q7S4A2	A2QLI6,A2Q7C6,A2Q843	g2620.t1,g9667.t1
Sec63 domain	IPR004179_PF02889	Cluster_1	2	2	3	2	3	2	3	3	3	3	3	3	3	4	2	2	2	2	2	2	2	2	2	2	3	3	2	P32639,P51979,P53327	Q7S600,Q7SH44,Q7S8K0	A2R8R8,A2QSE0,A2R365	g414.t1,g2179.t1
Zinc finger, MIZ-type	IPR004181_PF02891	Cluster_1	1	2	2	1	2	1	2	1	2	2	2	2	2	2	2	2	2	0	1	1	2	2	2	1	1	3	2	Q04195,Q12216	Q7S0G6,Q7SBB0	A5ABV2,A5AAY2	g1832.t1,g2222.t1
Beta galactosidase small chain/ domain 5	IPR004199_PF02929	Cluster_1	0	1	0	0	0	0	0	1	0	2	1	1	2	3	0	0	1	1	3	4	3	2	2	0	0	0	2		Q7S1W5,Q7SEC4		g135.t1,g6943.t1
Nonaspanin (TM9SF)	IPR004240_PF02990	Cluster_1	3	2	2	2	3	1	2	2	2	1	2	1	2	2	2	2	2	2	1	1	2	1	2	1	1	2	2	P32802,Q04562,P40071	Q7SA33,Q7S9T2	A2QLH3,A5AB43	g9813.t1,g1851.t1
Phosphotyrosyl phosphatase activator, PTPA	IPR004327_PF03095	Cluster_1	2	2	2	2	2	2	2	2	2	2	2	2	2	2	2	2	2	2	2	2	2	2	2	2	2	2	2	P40454,Q12461	Q7S6M5,Q7SEF9	A2QRL9,A2QWM8	g13388.t1,g5677.t1
SPX, N-terminal	IPR004331_PF03105	Cluster_1	11	2	2	2	3	2	2	2	2	1	2	2	2	2	2	2	2	2	2	2	2	2	2	1	1	1	2	P43585,Q02725,P47075	Q7SCX0,Q96U59	A2QPK9,A2QZF2	g6259.t1,g6732.t1
SPX, N-terminal	IPR004331_PF03105	Cluster_2	2	2	2	2	2	1	2	1	2	1	2	1	2	2	0	3	2	2	2	1	2	2	2	1	1	1	2	Q02979,P17442	Q01317,Q9P543	A2RAH5,A2QHK8	g2330.t1,g6464.t1
Aminoacyl-tRNA synthetase, class II (D/K/N)	IPR004364_PF00152	Cluster_1	2	2	2	2	2	2	2	2	3	2	2	2	2	3	2	2	2	2	2	2	2	2	2	2	2	2	2	P38707,P25345	Q7S0K1,Q7RYW2	A2R7D3,A2QFC9,A5AB89	g9553.t1,g12146.t1
Aminoacyl-tRNA synthetase, class II (D/K/N)	IPR004364_PF00152	Cluster_2	2	1	1	1	1	1	2	2	1	2	3	3	2	2	3	3	3	3	2	2	2	2	2	2	2	1	2	P04802	Q7S6E2,Q7SFD2	A2Q8U7	g4893.t1,g12228.t1
Aminoacyl-tRNA synthetase, class II (D/K/N)	IPR004364_PF00152	Cluster_3	2	2	2	2	2	2	2	2	2	2	2	2	2	2	2	2	2	2	2	2	2	2	2	1	1	1	2	P15180,P32048	Q7SFB6,Q870N5	A2Q8A6,A2QVR8	g12320.t1,g6522.t1
OB-fold nucleic acid binding domain, AA-tRNA synthetase-type	IPR004365_PF01336	Cluster_2	1	2	2	2	2	2	1	2	2	1	2	2	2	2	2	2	2	2	2	2	2	2	2	1	1	1	2	P15180,P32048	Q7SFB6,Q870N5	A2Q8A6,A2QVR8	g12320.t1,g6522.t1
Cyclin, C-terminal domain	IPR004367_PF02984	Cluster_1	1	2	2	2	6	2	2	2	2	2	2	2	2	2	2	2	2	2	2	2	2	3	2	2	2	2	2	P24868,P24869,P24870,P24871,P30283,P32943	Q7SCX6,Q7S7Z0	A2R635,A2Q9C7	g3311.t1,g6640.t1
Sodium/calcium exchanger membrane region	IPR004837_PF01699	Cluster_1	5	1	1	1	1	1	2	4	2	2	3	2	2	2	3	2	3	3	2	4	2	1	1	1	1	1	2	Q99385	Q7RVT1,Q7S9J5	A2RBL9,A2Q853	g12324.t1
Phosphoesterase domain	IPR004843_PF00149	Cluster_2	0	0	0	0	0	0	5	2	1	1	3	2	2	1	2	2	2	3	3	3	2	1	2	0	0	0	2		Q7S9T1,Q7RVV1	A2RAP0	g6198.t1,g4240.t1
Phosphoesterase domain	IPR004843_PF00149	Cluster_5	1	0	0	0	0	2	0	2	2	2	1	0	2	0	3	3	5	3	1	2	0	0	0	0	1	0	2		Q7S274,Q7S852	A2R1M4,A2R120
Transketolase-like, pyrimidine-binding domain	IPR005475_PF02779	Cluster_2	2	1	1	1	1	2	2	2	2	2	2	2	2	2	2	2	2	2	2	3	2	2	2	2	1	1	2	P32473	Q9P3R3,Q9P5K8	A2Q7C0,A2R211	g10383.t1,g13942.t1
Transketolase, C-terminal	IPR005476_PF02780	Cluster_1	2	1	1	1	1	2	2	2	2	2	2	2	2	2	2	2	2	2	2	3	2	2	2	2	1	1	2	P32473	Q9P3R3,Q9P5K8	A2Q7C0,A2R211	g10383.t1,g13942.t1
Carbamoyl-phosphate synthetase large subunit-like, ATP-binding domain	IPR005479_PF02786	Cluster_2	3	2	2	2	2	2	2	2	2	2	2	3	2	2	2	2	2	2	2	2	2	2	4	2	0	2	2	P03965,P07259	Q7S8A6,Q7SH52	A2QRW1,A2R7W3	g14966.t1,g2187.t1,g2190.t1,g9048.t1
Carbamoyl-phosphate synthetase, large subunit oligomerisation domain	IPR005480_PF02787	Cluster_1	3	2	2	2	2	2	2	2	2	2	2	2	2	2	2	2	2	2	2	2	2	2	2	2	0	2	2	P03965,P07259	Q7S8A6,Q7SH52	A2QRW1,A2R7W3	g2187.t1,g9048.t1
Carbamoyl-phosphate synthase, large subunit, N-terminal	IPR005481_PF00289	Cluster_2	3	2	2	2	2	2	2	2	2	2	2	3	2	2	2	2	2	2	2	2	2	2	4	2	0	2	2	P03965,P07259	Q7S8A6,Q7SH52	A2QRW1,A2R7W3	g14966.t1,g2187.t1,g2190.t1,g9048.t1
Translation elongation factor EFG/EF2, domain IV	IPR005517_PF03764	Cluster_1	6	2	2	3	2	3	2	2	3	2	2	2	3	3	2	2	2	2	2	2	2	2	2	3	2	3	2	P32324,P36048	Q96X45,Q7SB63,Q7SHP3	A2QD36,A2R3P3,A2R925	g15749.t1,g1865.t1
Fatty acid desaturase, type 1	IPR005804_PF00487	Cluster_3	3	1	1	1	0	1	1	3	2	1	2	2	1	1	2	2	3	3	2	2	2	2	2	1	1	1	2		Q7S476	A2QNS0,A2R895	g8343.t1,g9279.t1
ATP-citrate lyase/succinyl-CoA ligase	IPR005811_PF00549	Cluster_1	2	1	1	1	1	1	1	2	2	2	2	2	2	2	2	2	2	2	3	2	2	1	1	1	2	1	2	P53598	Q9P727,Q7SDJ1	A2QQL8,A2R9J7	g14551.t1
Aminotransferase class-III	IPR005814_PF00202	Cluster_1	1	2	1	2	1	1	1	1	1	1	1	1	1	1	2	2	1	1	2	3	2	2	3	0	1	1	2	P17649	Q7S2X2	Q58FL2	g5042.t1,g12979.t1,g3199.t1
Nucleotidyl transferase	IPR005835_PF00483	Cluster_1	5	2	2	2	1	2	2	2	2	2	2	2	2	2	2	2	2	2	2	2	2	2	2	0	0	3	2	P41940	Q7RVR8,Q7S2E1	A2QIW7,A2QVR6	g6905.t1,g10479.t1
Ureohydrolase	IPR006035_PF00491	Cluster_1	1	2	2	0	0	1	3	3	4	3	4	3	3	3	2	2	3	2	2	2	3	2	0	2	1	0	2		Q7RYW3,Q7SEY0,Q96U86	A2R3Y9,A2QBG2,A2QFE1,A2QGZ9
Xanthine/uracil/vitamin C permease	IPR006043_PF00860	Cluster_1	3	0	0	0	0	0	1	1	1	1	1	3	2	2	2	2	2	2	3	4	2	2	3	1	1	0	2		Q7SHC4,Q8NIU1	A2R1T8	g8405.t1,g11300.t1,g15769.t1
GTP binding domain	IPR006073_PF01926	Cluster_4	2	2	2	2	2	2	1	2	2	2	2	2	2	2	2	2	2	1	2	1	2	2	2	3	2	3	2	P53742,P40010	Q7SHR8,Q7SCS5	A2QQH2,A2QIJ9	g472.t1,g1358.t1
GTP binding domain	IPR006073_PF01926	Cluster_5	2	2	2	2	2	2	2	2	2	2	2	2	2	2	2	2	2	2	2	2	2	2	2	2	2	1	2	P39729,P53295	Q7RYS1,Q8X0M9	A2RAU8,A2R9C1	g11855.t1,g6067.t1
Glycoside hydrolase, family 2, immunoglobulin-like beta-sandwich	IPR006102_PF00703	Cluster_1	0	2	0	0	0	0	1	3	2	2	2	2	1	2	4	5	2	2	3	3	2	2	2	1	0	1	2		Q7SFE1	A2QYN2,A2QWU9	g8242.t1,g13281.t1
Glycoside hydrolase, family 2, immunoglobulin-like beta-sandwich	IPR006102_PF00703	Cluster_2	0	0	0	0	0	0	0	1	2	2	1	2	1	1	1	2	2	2	2	2	1	2	0	0	0	5	2		Q7SGD7	A2QBM9,A2QL36
Glycoside hydrolase, family 2, immunoglobulin-like beta-sandwich	IPR006102_PF00703	Cluster_3	0	1	0	0	0	0	0	1	0	2	1	1	2	3	0	0	1	1	3	3	2	2	2	0	0	0	2		Q7S1W5,Q7SEC4		g135.t1,g6943.t1
Glycoside hydrolase, family 2, TIM barrel	IPR006103_PF02836	Cluster_2	0	0	0	0	0	0	0	1	2	2	1	2	1	1	1	2	2	2	2	2	1	2	0	0	0	2	2		Q7SGD7	A2QBM9,A2QL36
Glycosyl hydrolases family 2, sugar binding domain	IPR006104_PF02837	Cluster_1	0	2	0	0	0	0	1	2	1	1	2	2	1	2	2	3	2	2	3	3	2	1	2	1	0	3	2		Q7SFE1	A2QYN2	g8242.t1,g13281.t1
Glycosyl hydrolases family 2, sugar binding domain	IPR006104_PF02837	Cluster_2	0	0	0	0	0	0	0	1	2	2	2	2	1	1	2	2	2	2	2	2	1	2	0	0	0	5	2		Q7SGD7	A2QBM9,A2QL36
Glycosyl hydrolases family 2, sugar binding domain	IPR006104_PF02837	Cluster_3	0	1	0	0	0	0	0	1	0	2	1	1	2	4	0	0	1	1	3	4	2	2	2	0	0	0	2		Q7S1W5,Q7SEC4		g135.t1,g6943.t1
DAHP synthetase I/KDSA	IPR006218_PF00793	Cluster_1	6	2	2	2	2	2	3	2	2	2	2	2	2	2	2	2	2	2	2	2	2	2	2	2	2	6	2	P14843,P32449	Q7S715,Q7SCQ0	A2Q900,A2R1A6	g625.t1,g14115.t1
Uncharacterised protein family Cys-rich	IPR006461_PF04749	Cluster_1	0	0	0	0	0	0	2	2	3	3	2	2	1	2	2	2	2	4	2	3	1	1	3	0	0	0	2		Q6MW50	A2QAN8,A2R5N5,A2R3K8	g8229.t1,g1771.t1,g10836.t1
Sel1-like	IPR006597_PF08238	Cluster_2	2	1	1	1	1	1	2	2	2	2	2	2	2	2	2	2	2	2	2	2	2	2	2	1	1	1	2	P38213	Q7SDF6,Q7SCK7	A2R8I6,A2Q8S5	g8267.t1,g5883.t1
Cyclin, N-terminal	IPR006671_PF00134	Cluster_1	1	2	2	2	6	2	2	2	2	2	2	2	2	2	2	2	2	2	2	2	2	2	2	2	2	2	2	P24868,P24869,P24870,P24871,P30283,P32943	Q7SCX6,Q7S7Z0	A2R635,A2Q9C7	g3311.t1,g6640.t1
Amidohydrolase 1	IPR006680_PF01979	Cluster_1	1	1	1	2	1	1	1	3	4	3	4	1	2	2	2	2	3	3	2	3	2	2	1	2	1	2	2	Q07729	Q7SA53,Q9P5W2	A2QBM5,A2QVE0,A2R2L2,A2R331	g4206.t1
Mechanosensitive ion channel MscS	IPR006685_PF00924	Cluster_1	0	0	0	0	0	1	2	2	1	2	2	2	2	3	2	3	2	2	2	2	3	2	3	1	1	0	2		Q873L5,Q8NIY0	A2R595	g6344.t1,g4411.t1,g10199.t1
Coatomer, WD associated region	IPR006692_PF04053	Cluster_1	3	2	2	2	2	2	2	2	2	3	2	2	2	2	2	2	2	2	2	2	2	2	2	2	2	2	2	P53622,P41811	Q7SA43,Q7S028	A2R767,A2QD53	g10529.t1,g9711.t1
Fatty acid hydroxylase	IPR006694_PF04116	Cluster_1	2	1	1	1	1	1	1	4	2	2	2	1	2	1	1	1	2	2	2	2	2	2	2	1	1	0	2	P32353	Q7SBB6,Q7S102	A2R7B3,A2R4E6	g2215.t1,g10932.t1
Fatty acid hydroxylase	IPR006694_PF04116	Cluster_4	0	0	0	0	0	0	1	3	1	2	2	0	0	0	2	2	3	3	2	2	0	1	2	0	1	0	2			A2QQR4	g8092.t1,g1102.t1
Neutral/alkaline nonlysosomal ceramidase	IPR006823_PF04734	Cluster_1	1	0	0	0	0	0	1	1	1	1	1	1	2	2	2	2	3	3	1	0	2	1	2	1	1	0	2		Q7S6I3,Q7S802	A2RB48	g14749.t1,g5360.t1
Zinc finger, Sec23/Sec24-type	IPR006895_PF04810	Cluster_1	4	2	2	2	3	2	2	2	2	2	2	2	2	2	2	2	2	2	2	2	2	2	2	2	2	2	2	P40482,P53953,P38810	Q7S4P3,Q7S0J9	A2QSG6,A2R7F3	g13146.t1,g9541.t1
Sec23/Sec24, trunk domain	IPR006896_PF04811	Cluster_1	4	2	2	2	3	2	2	2	2	2	2	2	2	2	2	2	2	2	2	2	2	2	2	2	2	2	2	P40482,P53953,P38810	Q7S4P3,Q7S0J9	A2QSG6,A2R7F3	g13146.t1,g9541.t1
Sec23/Sec24, helical domain	IPR006900_PF04815	Cluster_1	4	2	2	2	3	2	2	2	2	2	2	2	2	2	2	2	2	2	2	2	2	2	2	2	2	2	2	P40482,P53953,P38810	Q7S4P3,Q7S0J9	A2QSG6,A2R7F3	g13146.t1,g9541.t1
RNA polymerase Rpb1, domain 3	IPR007066_PF04983	Cluster_1	2	2	2	2	2	2	2	2	2	2	2	2	2	2	2	2	3	3	2	2	2	2	2	2	2	2	2	P04050,P04051	Q7RXJ6,Q7SDN0	A2QU24,A2QAT7	g3468.t1,g4710.t1
Gelsolin domain	IPR007123_PF00626	Cluster_1	3	0	1	2	3	1	2	2	2	2	2	2	1	2	2	2	2	2	2	2	2	2	2	2	1	1	2	P40482,P53953,P38810	Q7S4P3	A2QSG6,A2R7F3	g13146.t1,g9541.t1
Histone core	IPR007125_PF00125	Cluster_1	7	3	4	3	2	2	2	3	2	2	2	2	2	2	2	1	1	1	2	3	2	2	2	5	3	8	2	P36012,P61830	Q7RXR3,P07041	A2QRR5,A2R4J6	g13211.t1,g16091.t1
Histone core	IPR007125_PF00125	Cluster_3	6	3	2	2	3	2	2	2	2	2	2	2	2	2	2	2	2	2	2	2	2	2	2	4	2	3	2	P04911,P04912,Q12692	Q873G4,Q8X132	A2QY48,A2R702	g894.t1,g9258.t1
Transcription factor domain, fungi	IPR007219_PF04082	Cluster_21	0	0	0	0	0	0	0	0	3	2	1	0	1	0	4	16	2	1	2	5	2	0	0	0	0	0	2		Q7SFY4	A2QW67,A2QYL8,A2R1R3
PrpF protein	IPR007400_PF04303	Cluster_1	0	0	0	0	0	1	1	3	4	1	2	2	0	2	1	2	1	0	2	3	2	2	3	1	3	0	2			A2QZM6,A2QEH2,A2R9S7,A2R1J8	g5480.t1,g5541.t1,g6913.t1
Helicase-associated domain	IPR007502_PF04408	Cluster_2	2	1	1	1	1	1	2	2	1	2	2	2	2	3	2	2	2	2	2	2	2	2	2	3	3	3	2	Q06698	Q7S5P1,Q7RV11	A2R634	g13098.t1,g4683.t1
Catechol dioxygenase, N-terminal	IPR007535_PF04444	Cluster_1	0	1	1	0	0	0	1	2	2	3	2	2	2	2	2	2	2	2	2	2	4	2	4	0	1	0	2		Q7RW43,Q7RZE7	A2QNW8,A2R1P9	g5342.t1,g38.t1,g4454.t1,g14479.t1
Anoctamin/TMEM 16	IPR007632_PF04547	Cluster_1	1	1	1	1	0	1	1	2	2	2	2	1	1	2	2	2	2	2	2	2	2	2	2	1	1	1	2		Q7S8J4	A2R2U2,A2R347	g3029.t1,g4177.t1
RNA polymerase Rpb2, domain 7	IPR007641_PF04560	Cluster_1	3	2	2	2	2	2	1	2	2	2	2	2	2	2	2	2	2	2	2	2	2	2	2	2	1	2	2	P08518,P22276	Q7RYF4,Q9P6E7	A2QYC2,A2Q8V9	g4716.t1,g14942.t1
RNA polymerase Rpb2, domain 4	IPR007646_PF04566	Cluster_1	3	2	2	2	2	2	2	2	2	2	2	2	2	2	2	2	2	2	2	2	2	2	2	2	1	2	2	P08518,P22276	Q7RYF4,Q9P6E7	A2QYC2,A2Q8V9	g4716.t1,g14942.t1
RNA polymerase Rpb2, domain 5	IPR007647_PF04567	Cluster_1	3	3	2	2	3	2	2	2	2	2	2	3	3	3	3	2	2	2	3	2	2	2	2	2	2	2	2	P22138,P08518,P22276	O74633,Q7RYF4,Q9P6E7	A2QYC2,A2Q8V9	g4716.t1,g14942.t1
DNA mismatch repair protein MutS-like, N-terminal	IPR007695_PF01624	Cluster_1	1	2	2	2	2	2	2	2	2	2	2	2	2	2	2	2	2	2	2	2	2	2	2	2	2	1	2	P25336,Q03834	Q7SD11,Q7S4J6	A2QIC1,A2R1F6	g2628.t1,g1780.t1
DNA mismatch repair protein MutS, core	IPR007696_PF05192	Cluster_1	2	2	2	2	2	2	2	2	2	2	2	2	2	2	2	2	2	2	2	2	2	2	2	2	2	2	2	P25336,Q03834	Q7SD11,Q7S4J6	A2QIC1,A2R1F6	g2628.t1,g1780.t1
DNA mismatch repair protein MutS, connector domain	IPR007860_PF05188	Cluster_1	2	2	2	2	2	2	2	2	2	2	2	2	2	2	2	2	2	2	2	2	2	2	2	2	2	1	2	P25336,Q03834	Q7SD11,Q7S4J6	A2QIC1,A2R1F6	g2628.t1,g1780.t1
DNA mismatch repair protein MutS, clamp	IPR007861_PF05190	Cluster_1	2	1	1	2	2	2	2	2	2	1	2	2	2	2	2	2	2	2	2	2	2	2	2	2	2	2	2	P25336,Q03834	Q7SD11,Q7S4J6	A2QIC1,A2R1F6	g2628.t1,g1780.t1
Peptidase M16, C-terminal domain	IPR007863_PF05193	Cluster_1	4	3	3	3	3	2	2	2	2	2	2	3	2	2	2	2	2	2	2	2	2	2	2	2	2	2	2	P11914,P10507,P07256	P23955,P11913	A2QQX8,A2QAN9	g3451.t1,g9886.t1
Protein of unknown function DUF726	IPR007941_PF05277	Cluster_1	0	0	0	0	0	0	1	1	1	1	1	2	2	2	2	2	2	1	2	2	2	2	2	0	0	0	2		Q7SEZ8,Q9P6A7	A2QBX7	g4303.t1,g3477.t1
P-type ATPase, A domain	IPR008250_PF00122	Cluster_4	9	1	1	1	2	1	1	3	4	2	4	1	1	2	2	2	1	1	2	2	2	1	2	1	2	3	2	P05030,P19657	P07038	A2QEX1,A2R850,A2QUK4,A2Q8V1	g6238.t1,g5542.t1
Flavodoxin/nitric oxide synthase	IPR008254_PF00258	Cluster_1	3	0	0	0	0	0	0	3	3	1	1	1	1	4	2	2	1	2	2	3	5	1	1	6	0	0	2		Q7S8E0	A2R7A3,A2QLV1,A2Q966	g10673.t1
Oxidoreductase, FAD-binding domain	IPR008333_PF00970	Cluster_2	0	1	3	1	1	1	0	2	2	2	3	1	2	1	2	2	4	3	2	2	2	2	2	1	0	0	2	P39676	Q7S074,Q7SDB4	A2RA35,A2R2Z2	g15582.t1,g6604.t1
Galactosyl transferase	IPR008630_PF05637	Cluster_1	0	2	2	2	2	4	2	2	2	2	2	4	2	2	2	2	2	2	2	2	2	2	2	0	0	0	2	P50108,P46985	Q7SCI8,Q8X075	A2R5B3,A2QJ61	g10875.t1,g15502.t1
Clathrin adaptor, mu subunit, C-terminal	IPR008968_PF00928	Cluster_1	3	2	2	3	2	3	2	2	2	2	2	2	2	2	2	2	2	2	2	2	2	2	2	3	2	2	2	Q00776,Q99186	Q7RVT3,Q872J2	A2QGQ4,A2QMT0	g4352.t1,g7974.t1
Elongation factor G, III-V domain	IPR009022_PF14492	Cluster_1	6	1	1	1	1	3	2	2	2	2	2	2	2	1	2	2	2	2	1	1	2	2	1	2	0	1	2	P32324	Q96X45,Q7SHP3	A2QD36,A2R925	g1865.t1
Sucraseferredoxin-like	IPR009737_PF06999	Cluster_1	3	2	2	2	2	2	3	3	3	3	3	2	2	2	1	2	2	1	2	3	2	1	2	1	0	0	2	P38281,Q04689	Q7S210,Q9HED1	A2QIX9,A2R386,A2R789	g12311.t1,g6131.t1
TRP-like family	IPR010308_PF06011	Cluster_2	0	0	0	0	0	1	1	2	1	2	2	1	1	2	1	1	2	2	2	3	2	2	2	1	1	1	2		Q7SCN7	A2QYF8	g10155.t1,g12495.t1
TIP49, C-terminal	IPR010339_PF06068	Cluster_1	4	2	2	2	2	2	2	3	2	2	2	2	2	2	2	2	2	2	2	2	2	2	2	2	2	2	2	Q03940,Q12464	Q8WZS3,Q873C7	A2QJ63,A2Q8W3	g4271.t1,g9955.t1
Peroxisomal fatty acyl CoA transporter, transmembrane domain	IPR010509_PF06472	Cluster_1	4	2	2	2	2	2	2	2	2	2	2	2	2	2	2	2	2	2	2	2	2	2	2	2	2	2	2	P41909,P34230	Q7SD69,Q9P6C3	A2QRE9,A2Q8A9	g10574.t1,g1720.t1
Protein of unknown function DUF1275	IPR010699_PF06912	Cluster_1	0	0	0	0	0	0	2	4	3	4	5	1	1	2	1	1	2	2	3	4	2	3	2	1	1	0	2		Q7SFG5	A2QF34,A2QFX6,Q2I1B4	g925.t1,g12108.t1
Protein of unknown function DUF1295	IPR010721_PF06966	Cluster_1	0	0	0	0	0	0	0	0	0	0	0	2	1	2	0	2	2	2	0	2	2	2	0	0	2	2	2		Q7S0J6
Heterokaryon incompatibility Het-C	IPR010816_PF07217	Cluster_1	0	0	0	0	0	2	2	2	1	2	2	2	2	3	2	2	2	2	3	3	2	2	2	1	1	3	2		Q7RW88,Q7SFX0	A2R5Z9	g9936.t1,g3428.t1
Alcohol acetyltransferase	IPR010828_PF07247	Cluster_1	0	0	0	0	0	0	1	1	2	2	2	1	2	2	1	4	2	3	6	7	2	2	2	2	0	0	2		Q7S0T7,Q7SCI9	A2R2U1,A2QTL5	g15527.t1,g746.t1
Glycosyl hydrolase, family 88	IPR010905_PF07470	Cluster_1	0	0	0	0	0	0	0	2	1	3	1	2	1	2	0	0	1	2	2	3	3	3	1	0	0	0	2		Q7RXC1	A2R3S7	g10306.t1
DNA/RNA helicase, DEAD/DEAH box type, N-terminal	IPR011545_PF00270	Cluster_5	2	2	3	2	3	2	3	3	2	3	3	3	3	3	2	2	2	2	2	2	2	2	2	2	3	2	2	P32639,P51979,P53327	Q7S600,Q7SH44,Q7S8K0	A2R8R8,A2R365	g414.t1,g2179.t1
DNA/RNA helicase, DEAD/DEAH box type, N-terminal	IPR011545_PF00270	Cluster_7	2	2	2	2	2	3	2	2	2	2	2	2	2	1	2	2	2	2	2	2	2	2	2	2	2	3	2	P47047,P35207	Q7SHE9,Q873J5	A2R7X2,A5AAL0	g782.t1,g13939.t1
Major facilitator superfamily	IPR011701_PF07690	Cluster_28	0	0	0	0	0	0	1	1	1	1	0	1	1	0	3	5	2	3	3	2	0	1	1	1	0	0	2		Q7RZR6	A2QCS7	g8901.t1
Domain of unknown function DUF1605	IPR011709_PF07717	Cluster_2	2	1	1	1	1	1	1	1	1	2	1	1	2	1	1	1	2	1	2	2	2	2	1	3	2	2	2	Q06698	Q7S5P1,Q7RV11	A2R634	g13098.t1
Peptidase M16, N-terminal	IPR011765_PF00675	Cluster_1	4	3	3	3	3	2	2	2	2	2	2	2	2	2	2	2	2	2	2	2	2	2	2	2	2	2	2	P11914,P10507,P07256	P23955,P11913	A2QQX8,A2QAN9	g3451.t1,g9886.t1
DNA ligase, ATP-dependent, N-terminal	IPR012308_PF04675	Cluster_1	1	1	1	1	1	1	2	2	2	2	1	2	2	2	2	2	2	2	2	2	2	2	2	2	2	1	2	P04819	Q7RYJ3,Q7S2S0	A2QZF0,A5AA81	g15854.t1,g14808.t1
DNA ligase, ATP-dependent, C-terminal	IPR012309_PF04679	Cluster_1	1	1	1	1	1	1	2	2	2	2	1	1	2	2	2	2	2	2	2	2	2	2	2	2	2	1	2	P04819	Q7RYJ3,Q7S2S0	A2QZF0,A5AA81	g15854.t1,g14808.t1
DNA ligase, ATP-dependent, central	IPR012310_PF01068	Cluster_1	1	1	1	1	1	1	2	2	2	2	1	3	2	2	2	2	2	2	2	2	2	2	2	2	2	1	2	P04819	Q7RYJ3,Q7S2S0	A2QZF0,A5AA81	g15854.t1,g14808.t1
DSH, C-terminal	IPR012961_PF08148	Cluster_1	2	2	2	2	2	3	2	2	2	2	2	2	2	2	2	2	2	2	2	2	2	2	2	2	2	3	2	P47047,P35207	Q7SHE9,Q873J5	A2R7X2,A5AAL0	g782.t1,g13939.t1
NOP5, N-terminal	IPR012974_PF08156	Cluster_1	4	2	2	2	2	2	2	2	2	2	2	2	2	2	2	2	2	2	2	2	2	2	2	2	2	2	2	Q12499,Q12460	Q7S0H3,Q8X066	A2QE38,A2R7C9	g6250.t1,g3657.t1
NOSIC	IPR012976_PF08060	Cluster_1	4	2	2	2	2	2	2	2	2	2	2	2	2	2	2	2	2	2	2	2	2	2	2	2	2	2	2	Q12499,Q12460	Q7S0H3,Q8X066	A2QE38,A2R7C9	g6250.t1,g3657.t1
Sec23/Sec24 beta-sandwich	IPR012990_PF08033	Cluster_1	4	2	2	2	3	2	2	2	2	2	2	2	2	2	2	2	2	2	2	2	2	2	2	2	2	2	2	P40482,P53953,P38810	Q7S4P3,Q7S0J9	A2QSG6,A2R7F3	g13146.t1,g9541.t1
Amino acid transporter, transmembrane	IPR013057_PF01490	Cluster_1	4	2	2	2	2	1	1	2	2	2	3	2	2	2	2	2	2	2	2	2	2	2	1	1	1	1	2	P36062,P50944	Q7S5R8,Q9C257	A2QI37,A2QTT9	g6130.t1
BTB/POZ	IPR013069_PF00651	Cluster_1	0	0	0	0	0	0	2	2	1	2	1	2	2	2	2	2	2	2	2	2	2	2	2	0	0	0	2		Q7RY42,Q7SD64	A2Q8A1	g1740.t1,g8840.t1
Histidine phosphatase superfamily, clade-1	IPR013078_PF00300	Cluster_3	0	0	0	0	0	0	0	4	2	1	2	3	2	2	2	2	1	1	2	5	2	5	1	1	1	1	2		Q870N9,Q872X0	A5ABK9,A2Q7L9	g4716.t1
ATPase, AAA-2	IPR013093_PF07724	Cluster_2	4	2	2	2	2	2	2	2	2	2	2	2	2	2	2	2	2	2	2	2	2	2	2	2	1	2	2	P31539,P33416	P31540,Q7SDI0	A2QQR8,A2QAZ7	g8583.t1,g3735.t1
FAD-binding 8	IPR013112_PF08022	Cluster_1	0	0	0	0	0	0	2	1	1	1	1	2	2	2	2	2	2	2	2	3	2	2	3	2	0	2	2		Q7S581,Q7RW00	A2QSA5	g13890.t1,g9567.t1,g13871.t1
Ferric reductase, NAD binding	IPR013121_PF08030	Cluster_1	0	0	0	0	0	0	2	1	1	1	1	2	2	2	2	2	2	2	2	3	2	2	3	2	0	2	2		Q7S581,Q7RW00	A2QSA5	g13890.t1,g9567.t1,g13871.t1
Ferric reductase, NAD binding	IPR013121_PF08030	Cluster_3	0	0	0	0	0	0	1	3	4	3	3	2	2	2	1	1	1	1	2	2	2	2	2	0	0	0	2		Q7RY82,Q7SFM3	A2QUY2,A2QH08,A2QAQ6,A2QDC1	g2394.t1,g10956.t1
Ferric reductase transmembrane component-like domain	IPR013130_PF01794	Cluster_1	0	0	0	0	0	0	2	1	1	1	1	1	2	2	2	2	2	2	2	3	2	2	3	2	0	2	2		Q7S581,Q7RW00	A2QSA5	g13890.t1,g9567.t1,g13871.t1
Ferric reductase transmembrane component-like domain	IPR013130_PF01794	Cluster_3	0	0	0	0	0	0	1	3	4	3	3	2	2	2	1	1	1	1	2	2	2	2	2	0	0	0	2		Q7RY82,Q7SFM3	A2QUY2,A2QH08,A2QAQ6,A2QDC1	g2394.t1,g10956.t1
Methyltransferase type 11	IPR013216_PF08241	Cluster_2	2	1	1	1	1	1	1	1	1	1	1	1	1	2	2	2	1	2	2	2	2	2	2	0	0	0	2	P25087	Q9P3R1	A2R2Q6	g13943.t1,g15145.t1
DNA mismatch repair protein, C-terminal	IPR013507_PF01119	Cluster_1	1	1	1	1	2	1	1	1	2	2	2	2	2	2	1	2	1	1	2	2	1	2	2	1	1	1	2	Q07980,P14242	Q7SAM1,Q7SCN8	A2R5L0,A2QC49	g12059.t1,g5687.t1
Domain of unknown function DUF1785	IPR014811_PF08699	Cluster_1	2	0	0	0	0	0	3	3	2	1	3	2	2	3	3	3	2	3	1	2	2	2	2	3	0	2	2		Q8J276,Q9P8T1	A2QDC5,A2R8K3	g12423.t1,g5320.t1
DEK, C-terminal	IPR014876_PF08766	Cluster_1	4	0	0	0	0	2	2	2	1	2	2	2	1	2	2	2	2	2	1	2	2	2	2	1	2	2	2		Q7RX26	A2QC55	g7780.t1,g7785.t1
HIP116, Rad5p N-terminal	IPR014905_PF08797	Cluster_1	1	1	1	1	1	1	1	1	3	3	2	2	3	2	2	2	2	0	2	2	2	2	1	1	2	1	2	P32849	Q7S1P9,Q7S8T9,Q7SAR3	A2QC42,A2R9E3,A2QTI7	g10659.t1
Vps4 oligomerisation, C-terminal	IPR015415_PF09336	Cluster_1	1	2	2	2	1	1	0	2	2	1	2	2	2	2	2	2	2	3	2	2	2	2	1	1	1	1	2	P52917	Q7S4D9,Q7S0H4	A2R7C1,A2QLM2	g3651.t1
Uncharacterised conserved protein UCP014753	IPR016624_PF10022	Cluster_1	0	1	0	0	0	0	0	2	0	4	1	2	1	2	1	2	1	2	2	4	2	3	3	1	0	0	2		Q7RWH8		g7208.t1,g1437.t1,g14519.t1
Protein kinase, C-terminal	IPR017892_PF00433	Cluster_1	2	2	2	2	3	3	2	2	2	2	2	2	2	2	3	3	2	3	2	2	2	2	2	3	2	3	2	P11792,P12688,P18961	Q7SGW9,Q7RVX6	A2RB37,A2QD52	g10536.t1,g13186.t1
Glutamine amidotransferase	IPR017926_PF00117	Cluster_1	2	2	2	2	2	2	2	2	2	2	2	2	3	2	2	2	2	2	2	2	2	2	2	2	2	2	2	P37254,P00937	P00908,Q871Q4,Q8X0T2	A2QGH0,A2QRH6	g4312.t1,g12744.t1
Glutamine amidotransferase	IPR017926_PF00117	Cluster_3	3	2	2	2	2	2	2	2	2	2	2	2	2	2	2	2	2	2	2	2	2	2	2	2	1	2	2	P07258,P07259	P22572,Q7S8A6	A2R9B9,A2QRW1	g452.t1,g9048.t1
Mitochondrial substrate/solute carrier	IPR018108_PF00153	Cluster_5	3	2	2	2	3	5	2	2	1	2	2	2	2	2	3	2	2	2	2	2	2	2	2	3	2	2	2	P04710,P18239,P18238	P02723,Q7RXJ3	A2RAS8	g769.t1,g4707.t1
Mitochondrial substrate/solute carrier	IPR018108_PF00153	Cluster_7	2	1	1	1	1	2	2	1	2	3	3	3	2	2	1	1	2	2	2	2	2	1	1	1	2	2	2	Q06497	Q7S114,Q7RZP8	A2Q8K7,A2QCY9	g12437.t1
GDP dissociation inhibitor	IPR018203_PF00996	Cluster_1	3	2	2	2	2	2	2	2	2	2	2	2	2	2	2	2	2	2	2	2	2	2	2	1	2	2	2	P39958,P32864	Q7S909,Q7SGX8	A2QCC8,A2R0I1	g332.t1,g9728.t1
Rad4/PNGase transglutaminase-like fold	IPR018325_PF03835	Cluster_1	1	1	1	1	1	1	2	2	2	2	2	2	1	2	2	2	2	1	2	2	2	2	2	1	0	1	2	P14736	Q7S8M9	A2QTP4,A2QCI7	g1446.t1,g3225.t1
Rad4 beta-hairpin domain 1	IPR018326_PF10403	Cluster_1	1	1	1	1	1	1	2	2	2	2	2	2	1	2	2	2	2	1	2	2	2	2	2	1	0	1	2	P14736	Q7S8M9	A2QTP4,A2QCI7	g1446.t1,g3225.t1
Rad4 beta-hairpin domain 2	IPR018327_PF10404	Cluster_1	1	1	1	1	1	1	2	2	2	2	2	2	1	2	2	2	2	1	2	2	2	2	2	1	0	1	2	P14736	Q7S8M9	A2QTP4,A2QCI7	g1446.t1,g3225.t1
Rad4 beta-hairpin domain 3	IPR018328_PF10405	Cluster_1	1	1	1	1	1	1	2	2	2	2	2	2	1	2	2	2	2	1	2	2	2	2	2	1	0	1	2	P14736	Q7S8M9	A2QTP4,A2QCI7	g1446.t1,g3225.t1
Gluconate transport inducer 1/Pac2	IPR018608_PF09729	Cluster_1	8	2	2	2	2	3	2	1	2	2	2	2	1	2	2	2	2	2	2	2	2	2	2	5	2	2	2	P40002,P38867	Q7S0C3	A2R4P2,A2R7D9	g9547.t1,g2191.t1
Branched-chain alpha-ketoacid dehydrogenase kinase/Pyruvate dehydrogenase kinase, N-terminal	IPR018955_PF10436	Cluster_1	3	2	0	2	2	2	2	2	2	2	2	2	2	2	2	2	2	2	2	2	2	2	2	2	2	1	2	P40530,P53170	Q7RX27,Q9C272	A2QUF3,A2QD27	g7794.t1,g6823.t1
VTC domain	IPR018966_PF09359	Cluster_1	16	2	2	2	3	3	2	2	2	1	2	3	2	2	2	2	2	2	2	2	2	2	2	1	1	1	2	P43585,Q02725,P47075	Q7SCX0,Q96U59	A2QPK9,A2QZF2	g6259.t1,g6732.t1
Lactonase, 7-bladed beta propeller	IPR019405_PF10282	Cluster_1	0	0	0	0	0	0	1	2	2	1	3	2	2	2	1	1	1	1	2	2	2	3	2	0	0	4	2		Q7S6A9,Q7S9K3	A2QBC2,A2Q950	g7709.t1,g15804.t1
Clp ATPase, C-terminal	IPR019489_PF10431	Cluster_1	3	3	2	2	2	2	2	2	2	2	2	2	2	2	2	2	2	2	2	2	2	2	2	2	1	2	2	P31539,P33416	P31540,Q7SDI0	A2QQR8,A2QAZ7	g8583.t1,g3735.t1
Manganese/iron superoxide dismutase, N-terminal	IPR019831_PF00081	Cluster_1	2	2	2	1	1	2	1	2	2	2	2	2	2	2	2	2	2	2	2	2	2	3	2	3	2	1	2	P00447	Q9Y783,Q7S433	A2QAS0,A2QIV5	g6606.t1,g2600.t1
Manganese/iron superoxide dismutase, C-terminal	IPR019832_PF02777	Cluster_1	2	2	2	1	1	2	1	2	2	2	2	2	2	2	2	2	2	2	2	2	2	3	2	3	2	1	2	P00447	Q9Y783,Q7S433	A2QAS0,A2QIV5	g6606.t1,g2600.t1
Protein of unknown function DUF3468	IPR021858_PF11951	Cluster_1	0	1	0	0	0	0	0	1	1	2	2	1	0	1	2	2	2	2	1	3	1	3	3	0	0	0	2			A2QJR9	g3021.t1,g7738.t1,g92.t1
Protein of unknown function DUF3605	IPR022036_PF12239	Cluster_1	0	1	1	1	1	1	2	1	2	2	2	2	1	1	2	2	2	2	2	2	2	2	1	1	2	0	2	Q02754	Q7RXL2	A2QCV3,A2QP64	g3800.t1
Protein of unknown function DUF3779, phosphate metabolism	IPR022257_PF12621	Cluster_1	2	2	2	2	2	2	2	2	2	2	1	2	2	1	2	2	2	2	2	2	2	2	2	2	1	2	2	Q12252,Q03516	Q7SAG4,Q7RWN3	A2R3B1,A2R6X5	g173.t1,g5272.t1
Lactate/malate dehydrogenase, C-terminal	IPR022383_PF02866	Cluster_1	3	3	3	2	3	2	2	2	3	3	3	2	2	2	2	2	2	2	2	3	2	2	2	2	2	2	2	P22133,P17505,P32419	Q7S1D6,Q7SBB2	A5ABV4,A2QX13,A2QMH9	g2219.t1,g2535.t1
Hexokinase, N-terminal	IPR022672_PF00349	Cluster_1	7	2	2	3	4	2	4	3	3	3	4	2	2	2	2	2	2	2	4	2	3	3	2	2	2	4	2	Q04409,P04806,P04807,P17709	Q7SHS2,Q7SF75	A2QL93,A2R0H3,O93964	g3401.t1,g6734.t1
Hexokinase, C-terminal	IPR022673_PF03727	Cluster_1	11	2	2	3	4	2	4	3	3	3	4	3	2	2	2	2	2	2	4	2	3	3	2	2	2	5	2	Q04409,P04806,P04807,P17709	Q7SHS2,Q7SF75	A2QL93,A2R0H3,O93964	g3401.t1,g6734.t1
AP complex, mu/sigma subunit	IPR022775_PF01217	Cluster_1	3	2	1	1	1	1	2	1	2	2	2	2	1	2	2	2	2	2	2	2	2	1	2	3	0	1	2	Q00776	Q872J2	A2QGQ4,A2QMT0	g4352.t1,g7974.t1
HAD-like domain	IPR023214_PF00702	Cluster_2	2	1	2	2	2	1	2	2	2	2	2	1	3	2	2	3	2	2	2	1	3	2	2	1	1	2	2	P40527,Q12674	Q7S836,Q7S7W1,Q9HED0	A2R4T3,A2QJE9	g849.t1,g10508.t1
14-3-3 domain	IPR023410_PF00244	Cluster_1	6	1	1	1	2	2	2	2	2	2	2	2	2	2	2	2	2	2	2	2	2	2	2	2	1	2	2	P29311,P34730	Q7RVK6,Q7RW04	A5AAX7,A2RBC8	g481.t1,g6781.t1
Histone deacetylase domain	IPR023801_PF00850	Cluster_1	3	4	4	2	3	3	2	1	2	2	2	2	2	2	2	2	2	2	2	2	2	2	2	4	4	4	2	Q12214,P53096,P32561	Q7SEB0,Q7SEL7	A5AAY6,Q1ZZ50	g14450.t1,g10278.t1
NDT80 DNA-binding domain	IPR024061_PF05224	Cluster_1	0	0	0	0	0	0	0	1	1	1	1	1	2	2	2	2	2	2	2	2	2	2	2	0	0	0	2		Q7S6H5,Q9C2N1	A2R918	g6936.t1,g15422.t1
Uncharacterised protein family, glycosyl hydrolase catalytic domain	IPR024655_PF11790	Cluster_2	0	0	0	0	0	0	0	0	0	0	0	2	2	2	2	2	1	1	2	2	2	1	2	1	4	0	2		Q7S8E2,Q7S276		g4005.t1,g7273.t1
C4-type zinc-finger of DNA polymerase delta	IPR025687_PF14260	Cluster_1	2	2	2	2	2	2	1	2	2	2	2	2	2	1	2	2	2	2	2	2	2	1	1	2	2	2	2	P15436,P14284	Q8X0N7,Q8X1U8	A2QXN0,A2R6A0	g15424.t1
Domain of unknown function DUF4463	IPR027815_PF14703	Cluster_1	2	2	2	2	2	2	2	2	2	3	2	3	2	1	3	2	2	2	3	4	2	2	2	2	1	2	2	Q12252,Q03516	Q7SAG4,Q7RWN3	A2R3B1,A2R6X5	g173.t1,g5272.t1
Eisosome component PIL1/LSP1	IPR028245_PF13805	Cluster_1	2	2	1	2	2	1	2	2	2	2	2	2	2	2	2	2	2	2	2	2	2	2	2	1	3	1	2	Q12230,P53252	Q7SG47,Q7SHS4	A2QVK5,A2QPB7	g6737.t1,g9615.t1
Polyprenyl synthetase	IPR000092_PF00348	Cluster_1	2	1	1	1	1	1	3	10	9	6	3	1	1	7	1	1	3	3	3	1	3	1	1	1	1	2	2	Q12051	P24322	A2QFU9,A2QG66,A2QSI4,A2R6J8,A2QLQ7,A2QR38,A2QIT4,A2QRI5,A2QLV7	g13546.t1
Sodium:neurotransmitter symporter	IPR000175_PF00209	Cluster_1	0	0	0	0	0	0	0	1	0	1	1	2	0	3	0	0	1	2	3	3	2	4	2	0	0	0	2				g9382.t1,g5138.t1
Cellulose-binding domain, fungal	IPR000254_PF00734	Cluster_3	0	0	0	0	0	0	0	0	0	0	0	0	2	7	1	3	0	0	0	2	3	5	1	1	0	0	2		Q871E8,Q872L7		g11019.t1
Major intrinsic protein	IPR000425_PF00230	Cluster_2	2	0	0	1	2	2	1	4	3	4	4	2	0	1	2	2	2	2	2	1	2	1	0	5	2	2	2	P23900,P43549		A2QF45,A2R1T4,A2R6J5
Inositol monophosphatase	IPR000760_PF00459	Cluster_2	1	0	0	1	2	1	1	2	1	1	2	3	2	2	1	1	2	2	2	2	2	2	1	1	1	1	2	P38710,Q05533	P11634,Q7S9V8	A2QGL2	g3547.t1
FAS1 domain	IPR000782_PF02469	Cluster_1	0	0	0	0	0	0	1	0	0	0	0	3	2	2	2	2	1	1	4	4	6	6	0	0	0	0	2		Q7S426,Q8WZQ1
Zn(2)-C6 fungal-type DNA-binding domain	IPR001138_PF00172	Cluster_13	0	2	5	3	2	4	1	5	2	4	4	2	1	1	2	4	2	3	2	11	1	0	3	0	0	0	2	P38141,P26370	Q9P326	A2QJK5,A2R2P6	g12086.t1,g7161.t1,g2141.t1
Argininosuccinate synthase	IPR001518_PF00764	Cluster_1	2	1	1	1	1	0	2	1	1	1	1	1	1	2	2	2	2	3	2	2	2	1	1	1	1	2	2	P22768	Q7SDA7	A2R515	g6398.t1
UDP-glucose/GDP-mannose dehydrogenase, N-terminal	IPR001732_PF03721	Cluster_2	0	0	0	0	0	0	0	1	0	0	0	2	0	0	1	1	2	2	5	2	2	2	0	0	0	0	2
Phospholipase D/Transphosphatidylase	IPR001736_PF00614	Cluster_1	4	0	0	0	0	0	0	2	2	3	2	2	1	2	2	2	1	1	2	2	2	2	2	1	0	0	2		Q7S9W4	A2R689,A2QMI7	g7821.t1,g4190.t1
Signal transduction response regulator, receiver domain	IPR001789_PF00072	Cluster_2	0	0	0	0	0	0	0	0	1	1	2	9	2	3	1	1	1	1	3	2	2	3	1	0	0	0	2		Q7SEW7,Q7SFA8	A2QUX6	g3385.t1
Haem peroxidase, animal	IPR002007_PF03098	Cluster_1	0	0	0	0	0	0	3	5	3	3	2	2	1	2	1	2	3	3	2	2	3	2	1	3	1	0	2		Q7S550	A2QJ58,A2QYI1,A2QDQ5	g15040.t1
Haem peroxidase, plant/fungal/bacterial	IPR002016_PF00141	Cluster_3	0	0	0	0	0	0	0	1	1	1	1	1	1	2	2	2	1	1	2	2	2	2	1	0	1	0	2		Q8X182	A2Q7T1	g3579.t1
Alpha crystallin/Hsp20 domain	IPR002068_PF00011	Cluster_1	0	0	0	0	0	0	1	2	2	4	3	1	1	2	3	3	3	3	1	2	1	1	1	0	0	0	2		P19752	A2R9Y0,A2RBG6	g14071.t1
Phospholipid/glycerol acyltransferase	IPR002123_PF01553	Cluster_2	3	1	1	2	2	1	1	1	1	1	1	2	1	2	1	2	2	2	1	2	2	2	1	1	1	2	2	P38226,Q12185	Q7S0V1	A2R9N1	g15806.t1
Pyridoxal phosphate-dependent decarboxylase	IPR002129_PF00282	Cluster_1	2	1	1	1	1	1	2	2	2	2	2	3	2	2	1	1	2	2	2	2	2	2	2	1	1	1	2	Q04792	Q7SCH4,Q7SHX5	A5AB29,A2R5L8	g4115.t1,g758.t1
Pyridoxal phosphate-dependent decarboxylase	IPR002129_PF00282	Cluster_2	1	1	1	1	0	1	1	3	3	1	1	1	1	1	2	4	2	3	5	2	1	1	1	0	2	0	2		Q7S5H6	A5AA79,A2QG32,A2Q7H3	g13566.t1
Cation efflux protein	IPR002524_PF01545	Cluster_1	1	0	0	0	0	0	2	1	1	1	2	2	2	2	1	1	2	2	1	1	2	2	1	1	1	0	2		Q7S6L7,Q871S0	A2QGB9	g10527.t1
Lysophospholipase, catalytic domain	IPR002642_PF01735	Cluster_1	0	4	6	1	3	4	1	3	4	2	1	1	1	1	2	2	3	3	5	4	2	1	1	2	1	18	2	P39105,Q03674,Q08108	O42790	A2QKQ5,A2QT90,A2QII0,A2QF42	g1690.t1
Amine oxidase	IPR002937_PF01593	Cluster_1	0	0	0	0	0	0	2	3	4	2	1	1	1	3	0	2	0	3	1	2	2	2	1	0	1	0	2		Q7S0P0	A2Q7T2,A2R252,A2QZK2,A2R0X3	g4982.t1
Histidine kinase-like ATPase, ATP-binding domain	IPR003594_PF02518	Cluster_3	0	0	0	0	0	0	0	0	1	1	2	9	2	3	1	1	1	1	3	2	2	3	1	0	0	0	2		Q7SEW7,Q7SFA8	A2QUX6	g3385.t1
Signal transduction histidine kinase EnvZ-like, dimerisation/phosphoacceptor domain	IPR003661_PF00512	Cluster_3	0	0	0	0	0	0	0	1	1	1	2	8	2	3	1	1	1	1	3	2	2	3	1	0	0	1	2		Q7SEW7,Q7SFA8	A2QUX6	g3385.t1
Phosphatidylserine decarboxylase-related	IPR003817_PF02666	Cluster_2	0	0	0	0	0	0	0	4	1	1	1	0	2	0	3	2	4	4	2	2	0	0	0	3	0	0	2		Q7S568,Q872Y6	A2QYE1
Cation-transporting P-type ATPase, N-terminal	IPR004014_PF00690	Cluster_3	7	1	1	1	2	1	1	3	4	2	4	0	1	2	2	2	1	1	2	2	2	1	1	1	2	3	2	P05030,P19657	P07038	A2QEX1,A2R850,A2QUK4,A2Q8V1	g6238.t1
OB-fold nucleic acid binding domain, AA-tRNA synthetase-type	IPR004365_PF01336	Cluster_1	2	2	2	2	2	2	1	2	2	2	2	2	2	1	2	2	2	2	2	2	1	1	1	2	2	2	2	P38707,P25345	Q7S0K1,Q7RYW2	A2R7D3,A2QFC9	g12146.t1
Phosphoesterase domain	IPR004843_PF00149	Cluster_11	0	0	0	0	0	0	1	0	0	1	2	0	1	2	0	2	2	1	2	2	2	2	1	0	0	0	2		Q7RY32		g2080.t1
Iron permease FTR1	IPR004923_PF03239	Cluster_1	1	4	4	3	2	3	0	1	3	0	1	1	1	1	2	2	1	1	2	2	2	2	0	1	1	1	2	P38310,P40088	Q8X009	A2R5T7,A2Q9S7,A2R6S8
Xylulose 5-phosphate/Fructose 6-phosphate phosphoketolase	IPR005593_PF03894	Cluster_1	0	0	0	0	0	0	1	2	2	1	2	1	2	1	2	2	2	1	2	2	2	2	0	1	1	0	2		Q7S5G5,Q872M4	A2QDB0,A2R1L7
Terpene synthase, metal-binding domain	IPR005630_PF03936	Cluster_1	0	0	0	0	0	0	0	1	4	0	0	1	0	4	4	3	0	0	4	1	4	1	0	4	0	0	2			A2QUL9,A2QWS6,A2R124,A2QGY1
ATP-citrate lyase/succinyl-CoA ligase	IPR005811_PF00549	Cluster_2	2	1	1	1	1	1	2	2	2	1	2	1	1	1	2	2	2	2	2	1	2	1	1	1	2	1	2	P53312	Q9P567	A2QQL9,A2R2D0	g2302.t1
General substrate transporter	IPR005828_PF00083	Cluster_13	2	2	2	1	1	6	1	2	1	1	1	2	2	1	2	2	3	3	2	0	2	2	1	1	0	1	2	P36035	Q7SB47,Q9P732	A2QML5	g2675.t1
TRAM/LAG1/CLN8 homology domain	IPR006634_PF03798	Cluster_2	2	1	1	1	0	1	1	1	2	1	1	1	1	1	2	2	2	1	2	2	3	1	1	1	1	0	2		Q7SG95	A2QKE1,A2QHP6	g9755.t1
Ctr copper transporter	IPR007274_PF04145	Cluster_1	0	1	0	0	1	0	1	1	2	2	2	2	1	3	2	1	2	2	2	2	3	4	1	0	2	0	2	Q06686	Q7SEA4	A2QP60,A2QNF7	g10266.t1
Ctr copper transporter	IPR007274_PF04145	Cluster_2	0	0	0	0	0	1	1	1	1	0	1	2	1	2	1	1	1	2	2	2	2	2	1	0	0	1	2		Q7SF24	A2R085	g9789.t1
Emopamil-binding	IPR007905_PF05241	Cluster_1	0	0	0	0	0	0	1	2	1	2	2	1	1	1	2	2	1	2	2	2	2	1	2	0	0	0	2		Q7RZL9	A2QAY8	g12446.t1,g15172.t1
Extracellular membrane protein, CFEM domain	IPR008427_PF05730	Cluster_4	0	0	0	0	0	0	1	0	0	0	1	1	2	2	2	2	2	2	2	0	1	1	2	0	0	0	2		Q7S1U4,Q7SF01		g4130.t1,g4090.t1
Ceramidase	IPR008901_PF05875	Cluster_1	0	1	1	2	2	1	1	2	3	2	2	2	1	1	2	3	3	3	3	2	2	1	1	1	0	3	2	Q02896,P38298	Q7RUY9	A2R5Q0,A2Q9E9,A2Q964	g4414.t1
Fungal trichothecene efflux pump	IPR010573_PF06609	Cluster_1	0	0	0	0	0	0	1	2	1	4	2	8	2	0	0	0	1	2	2	5	2	4	1	0	0	0	2		Q7S0V6,Q7SF41	A2QTT1	g12099.t1
Tannase/feruloyl esterase	IPR011118_PF07519	Cluster_2	0	0	0	0	0	0	0	3	1	1	1	3	0	4	0	0	1	1	3	5	3	3	1	0	0	0	2			A2R0Z6	g7960.t1
Myc-type, basic helix-loop-helix (bHLH) domain	IPR011598_PF00010	Cluster_1	0	1	1	2	1	1	1	1	1	1	1	1	2	2	1	1	1	1	2	2	2	2	2	0	0	0	2	Q12398	Q7SHD5,Q7S6H4	A2QH09	g13837.t1,g5355.t1
Major facilitator superfamily	IPR011701_PF07690	Cluster_24	1	1	0	0	0	0	0	2	3	2	2	3	2	2	2	1	1	2	2	2	3	1	1	1	1	0	2		Q7S7L6,Q7S511	A2RBD2,A2QZP7,A2QHT3	g12778.t1
Thiamine pyrophosphate enzyme, C-terminal TPP-binding	IPR011766_PF02775	Cluster_2	2	1	1	1	2	2	2	4	3	3	3	3	1	2	1	2	2	2	1	3	2	1	1	1	1	1	2	P07342,P39994	Q7RVY3	A2R8K7,A2R7N6,A2QFR5	g8996.t1
Thiamine pyrophosphate enzyme, central domain	IPR012000_PF00205	Cluster_2	1	1	1	1	1	1	1	3	2	2	3	2	1	2	1	2	2	2	1	3	2	1	1	1	1	1	2	P07342	Q7RVY3	A2R7N6,A2QFR5	g8996.t1
Thiamine pyrophosphate enzyme, N-terminal TPP-binding domain	IPR012001_PF02776	Cluster_2	1	1	1	1	1	1	1	3	3	2	3	2	1	2	1	2	2	2	1	3	2	1	1	1	1	1	2	P07342	Q7RVY3	A2Q9V6,A2R7N6,A2QFR5	g8996.t1
X8	IPR012946_PF07983	Cluster_1	2	3	3	3	2	1	1	4	4	3	3	2	1	2	2	2	2	2	1	1	2	1	1	1	1	1	2	P22146,Q06135	Q872H7	A2QCC4,A2QHA8,A2R875,A2QT39	g14556.t1
TRAM1-like protein	IPR013599_PF08390	Cluster_2	2	1	1	1	0	1	1	1	2	1	1	1	1	1	2	2	2	1	2	2	2	1	1	0	1	0	2		Q7SG95	A2QKE1,A2QHP6	g9755.t1
Sterol methyltransferase C-terminal	IPR013705_PF08498	Cluster_1	0	0	0	0	0	0	1	1	1	1	1	1	1	1	2	2	1	2	2	2	1	2	1	0	0	0	2		Q9P3R1	A2R2Q6	g13943.t1
UDP-glucose/GDP-mannose dehydrogenase, dimerisation	IPR014026_PF00984	Cluster_2	0	0	0	0	0	0	0	1	0	0	0	2	0	0	1	1	2	2	5	2	2	2	0	0	0	0	2
Glutamine amidotransferase	IPR017926_PF00117	Cluster_2	0	1	1	1	1	1	2	2	3	2	5	2	2	2	2	1	2	2	5	6	2	2	1	1	0	1	2	Q12288	Q7SAC0,Q7RZV1	A2RA00,A2Q7W4,A2R2P2	g4224.t1
Carbohydrate kinase, FGGY, N-terminal	IPR018484_PF00370	Cluster_1	5	1	1	1	1	1	2	2	1	2	2	1	1	2	1	1	2	2	2	2	2	2	1	1	1	1	2	P32190	Q7S2F2	Q58FL1	g10476.t1
Carbohydrate kinase, FGGY, C-terminal	IPR018485_PF02782	Cluster_1	4	1	1	1	1	1	2	2	1	2	2	1	1	2	1	1	2	2	2	2	2	2	1	1	1	1	2	P32190	Q7S2F2	Q58FL1	g10476.t1
Xylulose 5-phosphate/Fructose 6-phosphate phosphoketolase, C-terminal	IPR018969_PF09363	Cluster_1	0	0	0	0	0	0	1	2	2	1	2	1	2	1	2	2	2	1	2	2	2	2	0	1	1	0	2		Q7S5G5,Q872M4	A2QDB0,A2R1L7
Xylulose 5-phosphate/Fructose 6-phosphate phosphoketolase, N-terminal	IPR018970_PF09364	Cluster_1	0	0	0	0	0	0	1	2	2	1	2	1	2	1	2	2	2	1	2	2	2	2	0	1	1	0	2		Q7S5G5,Q872M4	A2QDB0,A2R1L7
Mannosyltransferase 1, CMT1	IPR021047_PF11735	Cluster_1	0	0	0	0	0	0	0	1	2	0	0	1	1	2	2	2	2	1	1	3	2	1	1	0	0	0	2		Q7S0Y8	A2QIT3,A2R9Z2	g8262.t1
Protein of unknown function DUF3638	IPR022099_PF12340	Cluster_1	0	0	0	0	0	0	4	0	3	2	2	3	1	5	2	4	2	2	4	3	2	0	1	0	0	0	2		Q7SAD6	A2QS41,A2QSN8,A2QSW4	g13013.t1
Protein of unknown function DUF3645	IPR022105_PF12359	Cluster_1	0	0	0	0	0	0	3	0	3	2	2	3	1	3	2	4	2	2	3	3	2	0	1	0	0	0	2		Q7SAD6	A2QS41,A2QSN8,A2QSW4	g13013.t1
Phophatidylserine decarboxylase	IPR022237_PF12588	Cluster_1	0	0	0	0	0	0	0	4	1	1	1	0	2	0	3	2	4	4	2	2	0	0	0	3	0	0	2		Q7S568,Q872Y6	A2QYE1
Chromo domain	IPR023780_PF00385	Cluster_4	4	1	1	1	1	1	1	1	2	2	1	1	2	1	2	1	2	2	1	1	2	2	2	1	1	1	2	P32657	Q7SD03,Q7S7G9	A2Q9U8,A2QQE1	g509.t1,g4841.t1
Uncharacterised protein family, glycosyl hydrolase catalytic domain	IPR024655_PF11790	Cluster_1	0	0	0	0	0	0	1	1	2	2	1	3	1	2	1	2	2	3	1	2	1	3	1	4	0	0	2		Q9P4Z5	A2QVJ6,A2R877	g13575.t1
Ferric reductase transmembrane component-like domain	IPR013130_PF01794	Cluster_4	0	0	0	0	0	0	0	1	0	0	0	1	0	3	1	1	2	2	4	5	2	3	3	0	0	0	2				g2489.t1,g3075.t1,g14636.t1
LysM domain	IPR018392_PF01476	Cluster_2	0	0	0	0	0	0	3	2	1	2	1	0	2	0	4	2	0	5	2	3	1	1	1	0	0	0	2		Q7S8L7,Q7SG57	A2QZL4	g13724.t1
NB-ARC	IPR002182_PF00931	Cluster_1	0	0	0	0	0	0	0	3	5	8	1	0	0	1	1	6	0	2	5	3	2	1	2	0	0	0	1.5			A2QSQ9,A2QHA0,A2R5P3,A2QGG0,A2QME9	g9969.t1,g9004.t1
Peptidase S10, serine carboxypeptidase	IPR001563_PF00450	Cluster_3	0	0	0	0	0	0	1	4	4	1	4	3	1	1	1	1	5	5	2	2	3	1	0	2	1	5	1.5		Q86ZG0	A2QCT2,A2QL12,A2R2W1,A2QP32
Beta-ketoacyl synthase, N-terminal	IPR014030_PF00109	Cluster_4	0	0	0	0	0	0	1	5	4	7	2	2	0	1	2	2	3	3	1	0	4	0	0	0	0	0	1.5			A2QG45,A2QTH2,A2QTE9,A2QYQ2
Protein of unknown function DUF3433	IPR021840_PF11915	Cluster_1	0	0	0	0	0	0	0	0	0	0	0	1	1	2	1	1	1	1	3	2	2	2	4	0	0	0	1.5		Q8WZP6		g11259.t1,g10551.t1,g12861.t1,g1113.t1
Cellulose-binding domain, fungal	IPR000254_PF00734	Cluster_1	0	0	0	0	0	0	0	2	3	2	1	4	6	6	1	1	0	0	2	1	7	3	3	6	0	0	1.5		Q7S439,Q7SCJ5,Q7SHI8,Q7S111,Q7RWN7,Q7SHD9	A2R313,A2R5J9,A2R5N0	g4332.t1,g8042.t1,g12181.t1
Protein kinase domain	IPR000719_PF00069	Cluster_9	0	0	0	0	0	0	13	0	3	0	14	0	0	0	0	1	7	6	0	2	2	5	5	0	0	0	1.5			A2QAJ6,A2RA37,A2QJK6	g5244.t1,g15404.t1,g8264.t1,g922.t1,g12939.t1
Zn(2)-C6 fungal-type DNA-binding domain	IPR001138_PF00172	Cluster_29	2	0	0	0	0	0	0	1	2	1	3	3	1	0	1	2	1	3	4	2	1	2	4	0	0	0	1.5		Q7S6Q4	A2QTB9,A2R6S6	g14351.t1,g3068.t1,g1376.t1,g10143.t1
CRAL-TRIO domain	IPR001251_PF00650	Cluster_1	2	1	1	1	1	4	1	3	2	3	3	1	1	1	1	1	3	4	2	2	1	2	2	0	3	1	1.5	Q06705	Q7S3H6	A2QBA1,A2QLN8	g4942.t1,g10027.t1
Beta-lactamase-related	IPR001466_PF00144	Cluster_3	0	0	0	0	0	0	1	2	3	0	2	1	0	0	1	2	8	6	1	2	2	0	1	2	0	0	1.5			A2R777,A2R8D5,A2QLC6	g5063.t1
Peptidase M3A/M3B	IPR001567_PF01432	Cluster_1	2	2	1	1	1	2	1	3	3	0	1	1	1	1	1	3	1	4	3	2	3	1	2	1	0	1	1.5	P25375	Q7S9P7	A2QM17,A2R510,A2QMG0	g7152.t1,g1161.t1
Pectate lyase/Amb allergen	IPR002022_PF00544	Cluster_2	0	0	0	0	0	0	0	2	1	2	1	2	1	2	0	0	0	0	5	5	4	8	3	0	0	0	1.5		Q7SAA5	A2QV36	g15600.t1,g8034.t1,g14513.t1
Fumarylacetoacetase, C-terminal	IPR002529_PF01557	Cluster_2	1	0	0	0	0	0	1	3	3	3	2	2	1	2	1	1	1	1	3	4	2	3	3	0	2	0	1.5		Q7S6Q3	A2QEA7,A2QVP5,A2QIN6	g7527.t1,g11743.t1,g7048.t1
Phospholipase/carboxylesterase/thioesterase	IPR003140_PF02230	Cluster_2	0	0	0	0	0	0	3	0	0	0	2	2	0	1	1	1	3	4	3	5	0	2	4	0	0	0	1.5				g939.t1,g2132.t1,g644.t1,g9039.t1
D-isomer specific 2-hydroxyacid dehydrogenase, catalytic domain	IPR006139_PF00389	Cluster_1	0	1	3	1	1	2	2	4	3	3	3	2	1	1	1	2	3	3	2	5	1	1	1	2	2	0	1.5	P53839	Q7S9Y7	A2Q988,A2QU03,A2QX18	g3837.t1
Transcription factor domain, fungi	IPR007219_PF04082	Cluster_19	0	0	0	0	0	0	1	3	4	2	3	1	1	2	1	1	1	1	4	12	2	3	4	0	0	0	1.5		Q7S0L2	A2QU97,A2R0Q9,A2R3X2,A2QBG3	g5493.t1,g10712.t1,g15544.t1,g16032.t1
Transcription factor domain, fungi	IPR007219_PF04082	Cluster_22	0	1	0	1	0	0	0	1	3	1	5	2	2	1	1	1	0	1	3	9	2	3	4	0	0	0	1.5		Q7SEC6,Q7S9K1	A2QSS5,A2QKF3,A2QKL3	g13683.t1,g138.t1,g7705.t1,g11616.t1
CRAL/TRIO, N-terminal domain	IPR011074_PF03765	Cluster_1	2	1	1	1	1	4	1	2	2	3	3	1	1	1	1	1	3	4	2	2	1	2	2	0	3	1	1.5	Q06705	Q7S3H6	A2QBA1,A2QLN8	g4942.t1,g10027.t1
Peptidase S53, propeptide	IPR015366_PF09286	Cluster_2	0	0	0	0	0	0	0	2	3	1	2	1	0	1	2	10	3	4	0	0	2	0	0	1	0	1	1.5			A2QFW4,A2QVE4,A2Q7S3
Aromatic-ring-hydroxylating dioxygenase, alpha subunit, C-terminal domain	IPR015879_PF00848	Cluster_1	0	0	0	0	0	0	0	5	2	1	4	2	0	1	0	0	2	2	3	9	2	1	3	0	0	0	1.5			A2QM48,A2QK94	g3903.t1,g13474.t1,g2836.t1
Rieske [2Fe-2S] iron-sulphur domain	IPR017941_PF00355	Cluster_1	0	1	1	0	0	0	0	4	3	3	4	2	0	1	0	0	2	2	2	10	2	1	3	0	0	0	1.5			A2QM48,A2R4U1,A2QK94	g3903.t1,g13474.t1,g2836.t1
Mitochondrial substrate/solute carrier	IPR018108_PF00153	Cluster_6	1	1	1	2	2	2	1	3	2	2	2	3	1	2	1	1	1	1	2	3	3	2	3	1	3	1	1.5	P38152,P43617	Q7RWK9	A2R9S9,A2QY41	g74.t1,g6910.t1,g7450.t1
LysM domain	IPR018392_PF01476	Cluster_1	0	0	0	0	0	0	1	1	0	7	3	0	1	0	1	3	0	0	2	4	3	2	3	0	0	0	1.5		Q7S8L5		g12699.t1,g14436.t1,g2536.t1
Beta-galactosidase jelly roll domain	IPR025300_PF13364	Cluster_1	0	0	0	0	0	0	0	6	5	3	3	2	2	0	1	1	1	1	2	4	4	3	0	2	1	1	1.5		Q7SI10,Q8NIU3	A2QAN3,A2R3X5,A2QN51,A2QA64,A2QL84
Regulator of chromosome condensation, RCC1	IPR000408_PF00415	Cluster_1	4	1	2	1	1	1	1	1	2	1	1	1	1	2	1	1	4	2	1	1	2	2	2	2	1	1	1.5	P21827	Q7S6S6	A2QDL1,A2R2A7	g10130.t1,g10129.t1
Pyruvate carboxyltransferase	IPR000891_PF00682	Cluster_1	3	2	2	2	2	1	1	2	1	1	1	1	1	1	1	1	2	3	2	2	1	2	2	1	1	1	1.5	P48570,Q12122	Q7RVT2	A2QJ88	g1896.t1,g12333.t1
Lipase, GDSL	IPR001087_PF00657	Cluster_4	0	0	0	0	0	0	0	1	0	1	0	1	1	1	2	2	2	2	0	2	1	1	2	0	0	0	1.5		Q7S9U2		g3027.t1,g3564.t1
Zn(2)-C6 fungal-type DNA-binding domain	IPR001138_PF00172	Cluster_28	0	2	1	1	1	1	2	0	2	4	3	2	0	2	1	1	0	0	3	3	3	2	3	0	0	0	1.5	P21657		A2QGF1,A2QFN4	g5199.t1,g1280.t1,g12156.t1
DSBA-like thioredoxin domain	IPR001853_PF01323	Cluster_1	0	0	0	0	0	0	1	1	0	1	1	1	1	0	2	2	2	2	1	2	1	0	0	0	0	0	1.5		Q7S4H3
Tryptophan synthase beta subunit-like PLP-dependent enzymes superfamily	IPR001926_PF00291	Cluster_2	0	0	0	0	0	0	1	2	1	2	2	2	1	2	1	1	2	2	1	2	1	2	2	0	0	0	1.5		Q9C2I1	A2QI44	g9506.t1,g14497.t1
Glycoside hydrolase, family 35	IPR001944_PF01301	Cluster_1	0	0	0	0	0	0	0	6	5	3	4	2	2	0	1	1	1	1	2	4	4	3	0	3	1	1	1.5		Q7SI10,Q8NIU3	A2QAN3,A2R3X5,A2QN51,A2QA64,A2QL84
Amino acid/polyamine transporter I	IPR002293_PF13520	Cluster_4	2	0	0	0	0	1	1	2	3	2	1	3	1	3	1	1	1	1	2	2	3	2	3	1	1	1	1.5		Q9HED4	A2QM01,A2R4G4,A2R0V1	g9501.t1,g9371.t1,g6981.t1
Zinc finger, MYND-type	IPR002893_PF01753	Cluster_2	0	0	0	0	0	0	0	0	0	0	0	3	0	2	1	1	1	2	2	2	1	2	5	1	0	0	1.5				g3148.t1,g10300.t1,g10519.t1,g9994.t1,g8169.t1
Lipase, class 3	IPR002921_PF01764	Cluster_1	0	0	0	0	0	0	0	5	2	2	3	2	1	3	1	1	2	3	1	2	3	1	1	0	0	0	1.5		Q9C2C2	A2R709,A2QTI0	g9516.t1
CoA-transferase family III	IPR003673_PF02515	Cluster_2	2	0	0	0	0	1	2	2	2	3	3	2	1	1	1	2	1	2	1	4	2	3	2	2	1	1	1.5		Q7S970	A2RB14,A2QM45	g540.t1,g5057.t1
Zinc/iron permease	IPR003689_PF02535	Cluster_1	3	2	1	1	2	1	1	4	4	2	6	1	1	1	2	3	2	2	1	1	1	2	2	4	1	1	1.5	P32804,Q12436	Q7SB33	A2Q7R0,A2R0Y9,A2Q953,A2R6A4	g68.t1,g14179.t1
2-nitropropane dioxygenase, NPD	IPR004136_PF03060	Cluster_2	0	0	0	0	0	0	1	3	2	2	3	2	1	2	2	4	1	1	2	3	1	1	3	0	0	0	1.5		Q01284	A2QKU7,A2QKX9	g9338.t1,g15085.t1,g11313.t1
Saccharopine dehydrogenase / Homospermidine synthase	IPR005097_PF03435	Cluster_2	2	0	0	0	0	0	0	1	2	1	1	2	1	1	1	4	1	2	3	3	2	1	1	0	1	1	1.5		Q7S1Z0	A2QA58,A2QK13	g10122.t1
Ion transport domain	IPR005821_PF00520	Cluster_2	0	0	0	0	0	0	0	1	0	0	0	2	2	2	2	1	2	2	1	1	1	1	1	0	0	0	1.5		Q7S8B0,Q7S9R4		g3203.t1
TRAM/LAG1/CLN8 homology domain	IPR006634_PF03798	Cluster_1	1	2	1	1	2	1	1	1	1	1	2	1	1	1	2	2	2	1	1	2	3	1	2	1	1	2	1.5	P38703,P28496	Q7RY97	A2QVD3	g11361.t1,g12730.t1
Transcription factor domain, fungi	IPR007219_PF04082	Cluster_23	0	0	0	0	0	0	1	2	3	4	3	3	1	1	2	5	2	2	1	2	1	1	3	0	1	2	1.5		Q7S313	A2QEA6,A2QHE4,A2QA08	g4556.t1,g5797.t1,g14258.t1
Transcription factor domain, fungi	IPR007219_PF04082	Cluster_26	0	0	0	0	0	0	0	2	4	5	2	2	1	2	2	2	1	1	0	2	1	2	1	0	0	0	1.5		Q7SAH8	A2QWS9,A5ABE9,A2QJX5,A2R5W7	g8742.t1
YTH domain	IPR007275_PF04146	Cluster_1	0	0	0	0	0	1	1	1	1	1	1	1	2	2	2	2	2	1	1	1	1	1	2	1	0	1	1.5		Q7S1V3,Q7SCR8	A2R166	g15517.t1,g13386.t1
Pyoverdine biosynthesis	IPR007817_PF05141	Cluster_1	0	0	0	0	0	0	1	1	1	1	2	3	0	1	1	6	2	2	3	1	2	1	0	0	0	0	1.5			A2Q7Y0
Aldose 1-/Glucose-6-phosphate 1-epimerase	IPR008183_PF01263	Cluster_1	0	0	0	0	0	0	1	1	1	1	2	2	2	2	1	1	1	2	2	1	1	2	2	2	1	1	1.5		Q7SC22,Q7SBX7	A2QE24	g14460.t1,g14993.t1
Renal dipeptidase family	IPR008257_PF01244	Cluster_1	1	0	0	0	0	0	2	3	1	1	1	1	1	2	2	1	0	0	2	2	2	1	1	1	1	0	1.5		Q7S2C3	A2QAJ5	g11209.t1
Phenol hydroxylase, C-terminal dimerisation	IPR012941_PF07976	Cluster_1	0	1	2	0	0	0	0	8	3	4	4	2	3	1	1	2	1	1	3	5	3	0	2	3	1	1	1.5		Q7SA02,Q7SBN0,Q7S8D7	A2R0Y2,A2QRP1,A2QAK1	g8016.t1,g9854.t1
FAD-binding 8	IPR013112_PF08022	Cluster_3	0	0	0	0	0	0	1	3	4	3	3	2	2	1	1	1	1	1	2	2	2	2	2	0	0	0	1.5		Q7RY82,Q7SFM3	A2QUY2,A2QH08,A2QAQ6,A2QDC1	g2394.t1,g10956.t1
TRAM1-like protein	IPR013599_PF08390	Cluster_1	0	2	1	1	2	1	1	1	1	1	2	1	1	1	2	2	2	1	1	2	3	1	2	0	0	0	1.5	P38703,P28496	Q7RY97	A2QVD3	g11361.t1,g12730.t1
Glycoside hydrolase family 20, catalytic core	IPR015883_PF00728	Cluster_1	3	1	1	0	0	0	2	1	2	1	1	2	0	1	2	2	2	2	1	2	1	1	2	3	1	1	1.5			A2QTI6,A2QGF3	g6290.t1,g5086.t1
Beta-galactosidase, domain 2	IPR018954_PF10435	Cluster_1	0	0	0	0	0	0	0	5	5	3	4	2	2	0	1	1	1	1	2	3	4	3	0	3	1	1	1.5		Q7SI10,Q8NIU3	A2QAN3,A2R3X5,A2QN51,A2QA64,A2QL84
Cullin protein, neddylation domain	IPR019559_PF10557	Cluster_1	3	1	1	1	1	1	2	2	2	2	2	2	2	2	2	2	1	2	1	1	1	1	2	1	0	3	1.5	P53202	Q7RZU1,Q7SG66	A2R445,A2QVL7	g7669.t1,g589.t1
Flavin monooxygenase-like	IPR020946_PF00743	Cluster_5	0	0	0	0	0	0	0	0	1	0	0	2	0	1	1	1	2	2	4	3	2	1	1	0	1	0	1.5			A2R5V3	g7606.t1
Protein of unknown function DUF3468	IPR021858_PF11951	Cluster_2	0	0	0	0	0	0	0	0	0	1	0	1	1	0	2	2	2	1	3	4	1	1	2	0	0	0	1.5		P78704		g2572.t1,g12864.t1
Protein of unknown function DUF3712	IPR022185_PF12505	Cluster_1	0	0	0	0	0	0	1	7	2	4	4	1	1	2	1	1	2	4	2	2	1	1	2	0	0	0	1.5		Q7S0C0	A2Q8S3,A2QU50	g3730.t1,g4946.t1
Domain of unknown function DUF4243	IPR025337_PF14027	Cluster_1	2	0	0	0	0	0	1	3	1	3	2	1	1	1	1	2	1	3	1	3	2	2	1	3	1	0	1.5		Q7RVU6	A2QUH3	g6825.t1
Beta-galactosidase, domain 3	IPR025972_PF13363	Cluster_1	0	0	0	0	0	0	0	5	5	2	4	2	2	0	1	1	1	1	2	3	4	3	0	2	0	1	1.5		Q7SI10,Q8NIU3	A2QAN3,A2R3X5,A2QN51,A2QA64,A2QL84
OTT_1508-like deaminase	IPR027796_PF14441	Cluster_1	0	0	0	0	0	0	0	1	0	0	0	0	2	0	2	2	0	0	1	4	3	0	2	0	0	0	1.5		Q7S538,Q7RXC2		g13007.t1,g16014.t1
EXTL2, alpha-1,4-N-acetylhexosaminyltransferase	IPR015338_PF09258	Cluster_1	1	0	0	0	0	0	0	0	0	0	0	0	0	0	2	2	1	1	2	2	0	2	0	0	0	0	1.5
NUDIX hydrolase domain	IPR000086_PF00293	Cluster_2	0	1	1	1	1	1	0	2	1	1	2	2	2	1	1	1	1	1	2	2	2	2	1	1	1	2	1.5	Q01976	Q7SFA0,Q7SB27	A2QGU3	g10796.t1
Cellulose-binding domain, fungal	IPR000254_PF00734	Cluster_2	0	0	0	0	0	0	0	0	0	2	2	2	1	2	1	3	0	0	2	1	3	3	1	7	0	0	1.5		Q7RW51		g8156.t1
SNF2-related	IPR000330_PF00176	Cluster_10	0	0	0	0	0	0	1	2	1	1	1	2	1	1	2	2	1	1	2	2	2	1	1	0	0	0	1.5		Q7S8T9	A2QC42	g15204.t1
Protein kinase domain	IPR000719_PF00069	Cluster_11	0	0	0	0	0	0	0	0	0	0	1	0	0	0	4	2	5	6	1	3	0	0	0	2	0	8	1.5
Glycoside hydrolase, family 16	IPR000757_PF00722	Cluster_4	1	0	0	0	0	0	1	0	0	0	0	2	2	1	1	1	2	2	3	3	1	1	1	2	7	0	1.5		Q7S0E3,Q9C236		g14093.t1
Chitin-binding, type 1	IPR001002_PF00187	Cluster_1	0	0	0	0	0	0	1	1	3	5	1	0	0	2	1	5	1	1	3	7	6	0	1	0	0	0	1.5			A2R4L6,A2RBJ5,A2R4D3	g13724.t1
Thioesterase	IPR001031_PF00975	Cluster_2	0	0	0	0	0	0	1	0	1	0	0	1	0	1	2	2	2	2	2	1	1	0	0	0	0	0	1.5			A2QIQ6
Cytochrome P450	IPR001128_PF00067	Cluster_2	0	0	0	0	0	0	3	3	2	2	1	2	0	1	1	1	2	3	2	2	3	1	0	1	0	0	1.5			A2QJ58,A2QYI1
Zn(2)-C6 fungal-type DNA-binding domain	IPR001138_PF00172	Cluster_19	0	0	0	0	0	0	0	0	3	3	1	0	1	0	6	14	2	0	1	6	2	1	0	0	0	0	1.5		Q7SFY4	A2QW67,A2QYL8,A2R1R3
Zn(2)-C6 fungal-type DNA-binding domain	IPR001138_PF00172	Cluster_21	0	1	0	0	0	1	1	4	4	2	2	5	0	2	3	4	1	1	1	1	3	2	1	0	0	0	1.5			A2Q9Y4,A5ABA6,A2QSC6,A2QYF6	g14724.t1
Zn(2)-C6 fungal-type DNA-binding domain	IPR001138_PF00172	Cluster_26	0	0	1	1	2	0	0	5	5	2	5	0	0	0	2	3	2	2	1	2	1	0	1	1	1	0	1.5	Q08904,P50104		A2R9B6,A2R028,A2Q974,A2QKY1,A2QUB6	g1407.t1
Glycoside hydrolase, family 18, catalytic domain	IPR001223_PF00704	Cluster_3	0	0	0	0	0	0	1	1	0	1	1	0	1	2	1	1	2	2	2	2	1	1	1	0	0	0	1.5		Q7SC26		g7136.t1
Oxidoreductase FAD/NAD(P)-binding	IPR001433_PF00175	Cluster_6	0	0	0	0	0	0	0	2	3	2	3	1	1	2	0	2	2	1	2	2	1	1	1	0	0	0	1.5		Q7SGM3	A2Q7D3,A5AB91,A2QA06	g4554.t1
Beta-lactamase-related	IPR001466_PF00144	Cluster_4	0	0	0	0	0	0	2	1	0	0	1	1	1	0	2	7	4	1	4	3	0	0	0	0	0	0	1.5		Q9C2S3
Blood coagulation inhibitor, Disintegrin	IPR001762_PF00200	Cluster_1	2	0	0	0	0	1	1	2	1	2	1	1	1	2	1	1	2	2	2	3	1	1	2	1	1	1	1.5		Q7SCH0	A2QJ21	g5812.t1,g11487.t1
Glycoside hydrolase, family 3, N-terminal	IPR001764_PF00933	Cluster_3	0	0	0	0	0	0	0	3	1	2	1	2	2	2	2	2	0	0	1	0	3	0	1	1	0	0	1.5		Q7S0W4,Q7SET7	O00089	g1555.t1
Alkaline phosphatase	IPR001952_PF00245	Cluster_1	3	2	2	1	1	1	1	2	1	1	1	1	1	2	1	1	2	2	1	1	2	3	2	0	2	1	1.5	P11491	Q7S2X3	A5AAV2	g4715.t1,g14162.t1
Glycoside hydrolase family 3 C-terminal domain	IPR002772_PF01915	Cluster_3	0	0	0	0	0	0	0	3	1	2	1	2	2	3	2	2	0	0	1	0	3	0	1	1	0	0	1.5		Q7S0W4,Q7SET7	O00089	g1555.t1
Peptidase M20	IPR002933_PF01546	Cluster_2	0	2	2	1	1	2	0	1	1	2	1	1	0	1	2	2	0	0	3	4	2	1	1	4	1	0	1.5	P27614		A2QF94	g10784.t1
Transcription initiation factor IID, 18kDa subunit	IPR003195_PF02269	Cluster_1	1	1	1	1	1	1	1	1	1	1	1	1	1	1	1	1	2	2	2	2	1	2	1	1	1	1	1.5	P06844	Q7SAP8	A2QRU2	g6445.t1
ATPase, AAA-type, core	IPR003959_PF00004	Cluster_9	0	0	0	0	0	0	0	3	3	1	1	1	1	3	3	4	1	1	3	2	1	0	1	2	0	0	1.5		Q7S2N1	A5AB97,A2QG20,A2QNF6	g4138.t1
Translation elongation factor EFTu/EF1A, domain 2	IPR004161_PF03144	Cluster_3	2	2	2	2	2	2	2	2	2	2	2	2	1	2	2	1	2	2	1	1	2	1	1	1	2	1	1.5	P25039,P39677	Q7SH14	A2R994,A2QI77	g14664.t1
Interphotoreceptor retinol-binding	IPR005151_PF03572	Cluster_1	0	0	0	0	0	0	2	5	0	0	2	7	1	3	1	1	0	2	1	2	5	2	0	0	0	0	1.5		Q7S4Q8
Mob1/phocein	IPR005301_PF03637	Cluster_2	0	0	0	0	0	0	1	1	1	1	1	1	2	1	2	2	1	2	1	1	1	2	1	0	0	0	1.5		Q7SEN0,Q7SD46	A2QPZ1	g5875.t1
Zinc finger, C2H2	IPR007087_PF00096	Cluster_3	0	3	1	2	0	0	1	0	3	2	0	1	2	2	1	2	0	1	1	2	3	1	1	0	1	0	1.5		Q7S8U3,Q9P6Z0	A2QZW6,A2QG11,A2QMC6	g5939.t1
Transcriptional regulator PAI 2-type	IPR007396_PF04299	Cluster_1	0	0	0	0	0	1	1	3	2	1	4	0	0	1	1	1	2	2	2	2	1	2	1	1	0	0	1.5			A2RA01,A2QIU1	g14068.t1
Guanylate kinase/L-type calcium channel beta subunit	IPR008145_PF00625	Cluster_1	1	1	1	1	1	1	1	1	2	1	1	1	1	1	2	1	3	1	3	2	1	2	1	1	1	1	1.5	P15454	Q7SAD0	A2QPV2,A2Q992	g2940.t1
DALR anticodon binding	IPR008909_PF05746	Cluster_1	3	1	1	1	2	1	1	2	1	1	1	1	1	1	1	1	3	2	2	3	2	1	1	1	1	1	1.5	Q05506,P38714	Q7S3P2	A2QCV6	g12877.t1
Peptidase M20, dimerisation domain	IPR011650_PF07687	Cluster_2	0	2	2	1	1	2	0	1	1	2	1	1	0	1	2	2	0	0	2	4	2	1	1	4	1	0	1.5	P27614		A2QF94	g10784.t1
Major facilitator superfamily	IPR011701_PF07690	Cluster_30	0	1	0	0	1	0	0	1	2	2	1	2	0	0	0	0	2	1	2	2	2	2	1	0	0	0	1.5	Q04991		A2QYF4,A2R2N9	g14448.t1
Haemerythrin/HHE cation-binding motif	IPR012312_PF01814	Cluster_1	0	0	0	0	0	0	4	1	2	2	5	1	2	1	2	1	2	1	0	1	2	2	2	1	0	0	1.5		Q7S4A3,Q7RWD2	A2Q7M2,A2R128	g16195.t1,g10369.t1
Protein of unknown function DUF1688	IPR012469_PF07958	Cluster_1	2	0	0	1	0	1	1	2	2	1	2	2	1	1	2	2	1	1	2	3	1	2	1	1	1	1	1.5		Q9C2K0	A2QMT2,A2R0S9	g5966.t1
Amino acid transporter, transmembrane	IPR013057_PF01490	Cluster_4	0	0	0	0	0	0	0	4	1	1	3	0	0	0	0	0	2	2	7	12	2	1	6	0	0	0	1.5			A2QZN8	g5051.t1,g7872.t1,g15738.t1,g5018.t1,g11660.t1,g7121.t1
ATP-grasp fold, succinyl-CoA synthetase-type	IPR013650_PF08442	Cluster_1	2	1	1	1	1	1	1	2	2	1	2	1	1	1	2	2	2	2	1	1	2	1	1	1	1	1	1.5	P53312	Q9P567	A2QQL9,A2R2D0	g2302.t1
Copper amine oxidase, N3-terminal	IPR015802_PF02728	Cluster_2	2	1	1	1	0	1	1	2	1	1	2	2	1	2	0	0	1	2	2	3	1	2	1	0	0	0	1.5		Q7S6S1	A2R940	g14535.t1
Arginyl-tRNA synthetase, class Ia, core	IPR015945_PF00750	Cluster_1	3	1	1	1	2	1	1	2	1	1	1	2	1	1	1	1	3	2	2	3	2	1	1	1	1	1	1.5	Q05506,P38714	Q7S3P2	A2QCV6	g12877.t1
Cullin protein, neddylation domain	IPR019559_PF10557	Cluster_2	2	2	2	2	1	2	0	1	1	1	1	1	1	1	1	1	2	1	2	2	2	2	1	2	2	1	1.5	Q12018	Q7S9C8	A2QRF8	g8574.t1
Phosphoribosylglycinamide synthetase, ATP-grasp (A) domain	IPR020561_PF01071	Cluster_1	1	1	1	1	1	1	1	1	1	1	1	1	1	1	1	1	2	2	2	2	2	1	1	1	1	1	1.5	P07244	Q7RXB0	A2R4I8	g11118.t1
Protein of unknown function DUF3129	IPR021476_PF11327	Cluster_1	0	0	0	0	0	0	1	1	0	0	2	2	0	2	0	0	2	3	2	1	2	1	1	0	0	0	1.5				g11060.t1
Protein of unknown function DUF3292	IPR021709_PF11696	Cluster_1	0	0	0	0	0	0	0	2	1	2	2	1	1	2	1	2	0	0	2	1	2	2	0	1	1	0	1.5		Q7S3W6	A2QDY7
AMP-binding enzyme C-terminal domain	IPR025110_PF13193	Cluster_6	1	0	0	0	0	0	4	2	2	3	3	2	1	1	2	2	1	2	4	1	2	1	1	0	0	0	1.5		Q7SDM6	A2QYG7,A2QRV7	g16160.t1
Protein of unknown function DUF4419	IPR025533_PF14388	Cluster_1	0	0	0	0	0	0	1	2	1	0	2	1	0	1	3	5	1	4	2	2	0	1	2	0	0	0	1.5			A2R130	g4331.t1,g14130.t1
Iron/zinc purple acid phosphatase-like C-terminal domain	IPR025733_PF14008	Cluster_1	0	0	0	0	0	2	0	2	1	1	1	0	2	0	2	2	3	3	1	1	0	0	0	0	1	0	1.5		Q7S274,Q7S852	A2R120
Sulfatase	IPR000917_PF00884	Cluster_1	1	0	0	0	0	0	2	5	4	3	3	1	1	2	1	1	1	1	3	5	2	1	3	0	0	0	1		Q7RV09	A2R5Q1,A2QHE0,A2R6D6,A5AB99	g9352.t1,g4778.t1,g13374.t1
X-Pro dipeptidyl-peptidase-like domain	IPR000383_PF02129	Cluster_1	0	0	0	0	0	0	0	5	3	2	1	3	0	2	0	1	0	1	2	5	2	0	5	0	0	0	1			A2R8M8,A2QID1,A2R1S5	g1657.t1,g14047.t1,g14559.t1,g10142.t1,g6576.t1
Class II aldolase/adducin N-terminal	IPR001303_PF00596	Cluster_1	1	1	2	0	0	1	2	4	4	4	2	3	1	3	1	1	0	1	2	11	5	1	5	0	1	1	1		Q8X0E0	A2R0X0,A2R7G4,A2R1X4,A2R6L4	g8844.t1,g6385.t1,g10636.t1,g13991.t1,g14030.t1
Haem peroxidase, plant/fungal/bacterial	IPR002016_PF00141	Cluster_2	0	0	0	0	0	0	1	0	0	0	0	2	1	3	3	3	1	1	1	0	1	2	1	0	0	0	1		Q7RVV6		g6141.t1
Tannase/feruloyl esterase	IPR011118_PF07519	Cluster_1	0	0	0	0	0	0	0	3	3	3	0	4	0	1	0	1	1	1	3	11	3	2	5	0	0	0	1			A2QV40,A2QAH7,A2QVF5	g7490.t1,g13527.t1,g4837.t1,g7235.t1,g6599.t1
Peptidase S15/CocE/NonD, C-terminal	IPR013736_PF08530	Cluster_1	0	0	0	0	0	0	0	4	3	2	1	3	0	2	0	1	0	1	2	4	2	0	5	0	0	0	1			A2R8M8,A2QID1,A2R1S5	g1657.t1,g14047.t1,g14559.t1,g10142.t1,g6576.t1
Lipase, GDSL	IPR001087_PF00657	Cluster_1	0	0	0	0	0	0	0	1	0	4	2	1	0	1	1	1	1	1	2	4	2	4	1	0	0	0	1				g3702.t1
Bacterial alpha-L-rhamnosidase	IPR008902_PF05592	Cluster_1	0	0	0	0	0	0	0	4	2	4	2	3	0	1	0	1	1	0	3	8	0	3	5	0	0	0	1			A2QLZ4,A2QK23	g1899.t1,g4381.t1,g11670.t1,g6293.t1,g4955.t1
1, 4-beta cellobiohydrolase	IPR016288_PF01341	Cluster_1	0	0	0	0	0	0	0	1	2	2	1	4	3	3	1	1	0	0	1	1	3	4	4	1	0	0	1		Q7RXI7,Q871B5,Q872J7	A2QYR9,A2QQ99	g13853.t1,g15117.t1,g4147.t1,g4678.t1
UbiA prenyltransferase family	IPR000537_PF01040	Cluster_3	0	0	0	0	0	0	0	0	2	0	1	2	2	1	1	2	0	0	1	0	3	0	0	2	0	0	1		Q7RUX0,Q872P7	A2QIB5,A2QM50
Protein kinase domain	IPR000719_PF00069	Cluster_14	0	0	0	0	0	0	0	0	1	0	10	2	0	0	1	2	2	2	1	1	0	2	3	0	0	0	1			A2QTL4	g14705.t1,g12415.t1,g5711.t1
Glycoside hydrolase, family 28	IPR000743_PF00295	Cluster_3	0	0	0	0	0	0	0	1	1	1	1	0	0	0	1	2	1	1	0	1	1	1	1	0	0	0	1			Q27UA8	g11053.t1
Zn(2)-C6 fungal-type DNA-binding domain	IPR001138_PF00172	Cluster_22	0	0	0	0	0	0	1	0	7	2	9	1	0	1	3	6	1	0	1	2	1	1	3	0	0	0	1			A2R404,A2R9T3,A2QS30,A2QL88,A2QX47,A2QBJ7,A2R5L5	g6858.t1,g9372.t1,g2918.t1
Zn(2)-C6 fungal-type DNA-binding domain	IPR001138_PF00172	Cluster_24	0	0	0	0	0	0	0	1	2	1	2	2	1	1	5	4	1	1	4	8	1	1	1	0	0	0	1		Q8X0N9	A2R6H6,A2QLD8	g8893.t1
Zn(2)-C6 fungal-type DNA-binding domain	IPR001138_PF00172	Cluster_30	0	1	0	1	0	0	0	3	1	1	1	1	1	1	2	3	0	1	1	6	1	3	3	0	0	0	1		Q7S2U2	A2Q7N2	g4687.t1,g13517.t1,g1443.t1
Mg2+ transporter protein, CorA-like/Zinc transport protein ZntB	IPR002523_PF01544	Cluster_3	0	0	0	0	0	0	0	1	1	3	1	2	1	1	1	1	0	0	2	2	1	2	3	0	0	0	1		Q7S428	A2QAR6	g127.t1,g7210.t1,g14456.t1
Pectate lyase, catalytic	IPR004898_PF03211	Cluster_1	0	0	0	0	0	0	0	3	0	5	1	1	1	1	0	0	0	0	6	10	4	10	3	0	0	0	1		Q7S4B7		g13663.t1,g14376.t1,g3630.t1
Transcription factor domain, fungi	IPR007219_PF04082	Cluster_30	0	0	0	0	0	1	0	0	0	0	1	0	1	1	1	3	1	0	1	2	1	1	1	1	3	0	1		Q7RW91		g9947.t1
Peptidase S28	IPR008758_PF05577	Cluster_1	0	0	0	0	0	0	0	0	1	0	0	0	1	4	1	1	2	4	1	0	2	0	0	2	0	0	1		Q7S134	A2QR21
Proline racemase family	IPR008794_PF05544	Cluster_1	0	0	0	0	0	0	0	3	3	1	2	1	0	0	0	1	2	2	2	9	1	0	3	0	0	0	1			A2QL16,A2QR47,A2R740	g5050.t1,g8728.t1,g11658.t1
Fungal chitosanase	IPR009939_PF07335	Cluster_1	0	0	0	0	0	0	0	0	0	0	0	0	1	1	1	2	1	1	1	2	1	1	1	0	0	0	1		Q7SHJ5		g11149.t1
Epoxide hydrolase, N-terminal	IPR010497_PF06441	Cluster_1	0	0	0	0	0	0	0	2	1	1	2	1	0	3	1	0	2	2	1	2	1	1	1	3	0	0	1			A2R6T7	g2884.t1
Xylose isomerase-like, TIM barrel domain	IPR013022_PF01261	Cluster_1	0	0	0	0	0	0	1	3	3	2	4	2	1	1	1	1	1	2	2	2	1	1	1	0	0	0	1		P07046	A2QQV5,A2QJS4,A2R1S8	g1098.t1
Protein of unknown function DUF3632	IPR022085_PF12311	Cluster_1	0	0	0	0	0	0	1	3	1	1	1	1	1	0	1	1	2	1	1	3	2	1	0	0	0	0	1		Q873G0	A2R0W6
Guanine-specific ribonuclease N1/T1	IPR000026_PF00545	Cluster_1	0	0	0	0	0	0	0	2	0	1	1	1	1	1	1	2	2	1	1	1	3	2	2	1	1	0	1		P09646		g11031.t1,g13860.t1
Aminotransferase, class V/Cysteine desulfurase	IPR000192_PF00266	Cluster_2	1	1	1	1	1	1	1	2	2	2	2	2	2	1	1	1	1	1	2	2	2	1	2	1	1	1	1	Q05979	Q7RXY2,Q7S332	A2QJI5,A2R7T0	g8509.t1,g11024.t1
Cellulose-binding domain, fungal	IPR000254_PF00734	Cluster_4	0	0	0	0	0	0	0	1	2	0	2	1	2	1	1	2	0	0	1	1	2	1	0	3	0	0	1		Q7S1P1,Q7SDR1	A2QAI8,A2R8E0
X-Pro dipeptidyl-peptidase-like domain	IPR000383_PF02129	Cluster_2	0	0	0	0	0	0	0	3	4	1	1	1	1	1	0	1	0	0	1	7	1	1	4	0	1	0	1		Q7S822	A2QBR7,A2R8B6,A2QHT5,A2QMA7	g13100.t1,g14561.t1,g7919.t1,g7046.t1
Oxidoreductase, molybdopterin-binding domain	IPR000572_PF00174	Cluster_1	0	0	0	0	0	0	1	0	3	2	2	2	1	1	1	1	1	2	1	1	1	2	2	1	1	0	1		P08619	A2QRD2,A2QPB9,A2QPC0	g11071.t1,g13299.t1
Dihydroxy-acid/6-phosphogluconate dehydratase	IPR000581_PF00920	Cluster_2	0	0	0	0	0	0	0	1	2	1	1	0	0	2	1	1	0	0	1	1	1	1	2	0	0	0	1			A2QPL6,A2QXK2	g5986.t1,g14022.t1
Drug/metabolite transporter	IPR000620_PF00892	Cluster_1	3	1	1	1	2	1	1	1	1	1	1	2	1	2	1	1	1	1	1	2	2	1	0	3	2	0	1	Q04835,Q08980	Q8WZT4	A2QQ08
Glycoside hydrolase, family 16	IPR000757_PF00722	Cluster_6	0	0	0	0	0	0	0	0	0	2	0	1	2	1	1	1	1	1	3	2	1	0	0	0	0	0	1		Q7S6B8,Q7RX89
AMP-dependent synthetase/ligase	IPR000873_PF00501	Cluster_7	2	1	1	1	1	1	2	3	3	3	3	4	1	2	1	1	1	1	1	1	2	1	2	0	1	0	1	P38225	Q7S4F3	A2QPE7,A2R4X6,A2QCE9	g1337.t1,g12101.t1
Chitin-binding, type 1	IPR001002_PF00187	Cluster_2	0	0	0	0	0	0	0	0	0	0	0	4	0	4	1	0	0	1	1	0	4	1	2	0	0	0	1				g7173.t1,g10375.t1
Lipase, GDSL	IPR001087_PF00657	Cluster_3	0	0	0	0	0	0	0	2	2	1	2	1	1	1	0	1	0	0	3	1	2	1	1	1	0	1	1		Q7S0T1	A2QC75,A2QPC2	g12176.t1
Zn(2)-C6 fungal-type DNA-binding domain	IPR001138_PF00172	Cluster_20	0	4	3	3	2	2	0	1	2	3	3	2	2	1	2	3	1	1	1	1	1	1	1	0	1	0	1	P08638,P34228	Q7RZM1,Q7SDB6	A2QTW6,A5AAZ4	g5556.t1
Zn(2)-C6 fungal-type DNA-binding domain	IPR001138_PF00172	Cluster_23	0	0	0	0	0	0	1	2	5	4	3	1	1	0	2	5	1	1	1	4	1	1	3	0	3	0	1		Q7SGM0	A2QZH8,A2QEA6,A5ABX0,A2QHE4,A2QA08	g4556.t1,g5797.t1,g14258.t1
Zn(2)-C6 fungal-type DNA-binding domain	IPR001138_PF00172	Cluster_32	0	0	1	1	0	0	1	3	2	1	2	1	1	0	1	1	1	0	2	5	3	3	2	0	0	0	1		Q7SAG0	A2QXD7,A2QM36	g5263.t1,g2553.t1
Zn(2)-C6 fungal-type DNA-binding domain	IPR001138_PF00172	Cluster_33	0	1	1	1	1	1	1	1	3	2	4	1	1	1	1	1	1	1	1	1	1	1	3	0	1	0	1	Q04052	Q7RXR4	A2QVP3,A2R3L4,Q1ZYK3	g13239.t1,g14878.t1,g12219.t1
Zn(2)-C6 fungal-type DNA-binding domain	IPR001138_PF00172	Cluster_38	0	0	0	1	0	0	0	1	1	1	2	2	1	1	1	1	1	1	2	3	1	1	3	1	1	0	1		Q7RW61	A2QH26	g5976.t1,g11687.t1,g7476.t1
Zn(2)-C6 fungal-type DNA-binding domain	IPR001138_PF00172	Cluster_42	0	1	0	1	0	0	0	1	2	1	2	1	0	1	0	0	2	2	1	1	1	1	2	1	1	0	1			A2QDY9,A5ABU4	g13330.t1,g14333.t1
Zn(2)-C6 fungal-type DNA-binding domain	IPR001138_PF00172	Cluster_53	0	0	0	0	0	0	1	1	1	0	2	1	1	1	1	1	1	1	0	1	1	0	3	0	0	0	1		Q7S0I0	A2QH75	g12091.t1,g10489.t1,g3351.t1
Pyridine nucleotide-disulphide oxidoreductase, NAD-binding domain	IPR001327_PF00070	Cluster_11	0	0	0	0	0	0	0	1	1	1	1	1	1	1	1	0	1	1	1	1	1	1	2	1	0	0	1		P38681	A2QRD5	g117.t1,g13301.t1
Dynamin, GTPase domain	IPR001401_PF00350	Cluster_3	0	0	0	0	0	0	2	2	2	1	2	1	2	1	2	1	2	1	1	1	2	1	2	0	0	0	1		Q7SBP5,Q7SAH6	A2QF70,A2QJR3	g11705.t1,g13182.t1
Oxidoreductase FAD/NAD(P)-binding	IPR001433_PF00175	Cluster_3	0	0	0	0	0	0	1	2	3	2	2	2	1	1	1	1	0	2	1	1	1	2	2	2	1	0	1		P08619	A2QRD2,A2QPB9,A2QPC0	g11071.t1,g13299.t1
Arylamine N-acetyltransferase	IPR001447_PF00797	Cluster_1	0	0	0	0	0	0	1	3	3	1	3	2	1	2	1	1	1	1	3	6	1	1	1	0	1	0	1		Q7S5T7	A2QJ42,A2QZ08,A2R6U0	g15405.t1
Src homology-3 domain	IPR001452_PF00018	Cluster_1	2	1	1	0	1	1	1	2	1	2	1	1	1	1	1	1	1	1	1	1	1	0	2	0	1	1	1	P04821	Q7RYH5	A2R650	g12535.t1,g10852.t1
Glycoside hydrolase, family 5	IPR001547_PF00150	Cluster_3	0	0	0	0	0	0	0	2	3	2	3	1	1	1	0	0	0	0	2	2	2	1	2	1	0	0	1		Q7SDR1	A2QAI8,A2R8E0,O74706	g5785.t1,g999.t1
Carbonic anhydrase	IPR001765_PF00484	Cluster_1	1	1	1	1	1	1	1	1	2	2	2	2	2	2	1	1	1	1	1	1	2	2	2	0	0	0	1	P53615	Q7S4J8,Q7S631	A2QGL5,A2QTS0	g248.t1,g6866.t1
CMP/dCMP deaminase, zinc-binding	IPR002125_PF00383	Cluster_1	0	1	1	1	1	1	1	1	1	1	2	1	0	1	1	2	2	1	2	2	1	1	1	0	1	1	1	Q12362		A2QC19	g5318.t1
Aminoacyl-tRNA synthetase, class II (G/ H/ P/ S), conserved domain	IPR002314_PF00587	Cluster_3	2	1	1	1	2	1	1	1	2	1	1	1	1	1	1	1	2	2	1	1	1	1	2	1	1	1	1	Q06817,P38088	Q7RYQ5	A2QYS0,A2R9M8	g15880.t1,g8615.t1
Polysaccharide deacetylase	IPR002509_PF01522	Cluster_2	0	0	0	0	0	0	0	1	2	2	3	4	0	1	1	2	1	1	2	3	2	1	2	1	0	0	1			A2QAZ6,A2R4F9	g4505.t1,g11285.t1
ThiJ/PfpI	IPR002818_PF01965	Cluster_2	0	0	0	1	0	0	0	2	3	1	1	1	1	1	1	2	1	1	1	5	1	1	2	1	1	0	1		Q7S9R2	A2QZC0,A2R329,A2R6R4	g5956.t1,g5957.t1
Survival protein SurE-like phosphatase/nucleotidase	IPR002828_PF01975	Cluster_1	0	3	1	1	0	3	0	0	1	1	1	1	0	1	1	1	2	2	2	2	1	1	1	3	1	3	1			A2R311	g13733.t1
Dienelactone hydrolase	IPR002925_PF01738	Cluster_1	0	0	0	0	0	0	1	2	5	1	2	2	1	1	1	2	1	1	2	3	1	1	1	0	0	0	1		Q7S6C5	A2QSH5,A2QCS6,A2QSJ9,A2R6K4,A2R9W7	g10612.t1
Peptidase M20	IPR002933_PF01546	Cluster_3	0	1	0	1	0	2	1	3	1	1	1	5	1	1	1	1	1	1	2	3	3	1	2	0	0	0	1		Q7S4G6	A2RBC2	g3121.t1,g14282.t1
Amine oxidase	IPR002937_PF01593	Cluster_2	0	0	0	0	0	0	1	2	2	2	1	2	0	0	1	1	0	1	3	7	0	1	5	0	0	0	1			A2QDU8,A2QZ13	g3593.t1,g7163.t1,g11749.t1,g14772.t1,g15238.t1
Sirtuin family	IPR003000_PF02146	Cluster_1	1	1	1	2	2	2	1	1	1	1	1	1	1	1	1	1	1	1	1	1	1	1	1	1	0	0	1	P53687,P53688	Q7SCK0	A2QQH0	g514.t1
Carbon-nitrogen hydrolase	IPR003010_PF00795	Cluster_5	0	0	0	0	0	0	0	0	0	0	0	0	1	3	2	2	1	1	1	1	1	1	2	0	0	0	1		Q871X8		g10498.t1,g9804.t1
Ornithine cyclodeaminase/mu-crystallin	IPR003462_PF02423	Cluster_1	2	1	1	1	0	1	2	2	2	2	1	1	1	1	1	1	1	2	2	3	2	1	2	1	0	0	1		Q7S632	A2Q874,A2QWR8	g5232.t1,g11656.t1
Putative fluoride ion transporter CrcB	IPR003691_PF02537	Cluster_1	0	1	0	0	0	0	1	1	1	1	1	1	1	1	1	2	1	1	1	1	1	1	2	0	0	0	1		Q7SB51	A2R519	g9873.t1,g5544.t1
Phosphatidylserine decarboxylase-related	IPR003817_PF02666	Cluster_1	2	1	2	1	1	1	2	1	2	2	2	1	1	1	1	1	3	2	1	1	1	2	2	4	2	1	1	P53037	Q872A4	A2QU82,A2QGE0	g1821.t1,g9384.t1
CDC45 family	IPR003874_PF02724	Cluster_1	0	0	0	0	0	0	1	1	1	1	1	1	1	1	1	1	1	1	1	1	1	1	2	0	0	0	1		Q7RZ94	A2QB16	g16178.t1,g5314.t1
Glycerophosphoryl diester phosphodiesterase	IPR004129_PF03009	Cluster_1	1	1	1	1	1	1	3	2	2	1	2	1	1	1	0	3	2	2	1	1	1	1	1	0	0	0	1	Q02979	Q9P543	A2R5M6,A2RAH5	g6464.t1
Carotenoid oxygenase	IPR004294_PF03055	Cluster_1	4	0	0	0	0	1	0	2	1	1	1	1	1	1	1	2	1	1	1	3	1	2	1	0	0	0	1		Q7S1H5	A2QI93	g164.t1
Membrane bound O-acyl transferase, MBOAT	IPR004299_PF03062	Cluster_1	0	1	1	1	2	1	1	1	1	1	2	2	2	1	1	1	1	1	2	2	2	1	2	1	1	1	1	P25628,P53629	Q7RXJ1,Q9C2E9	A2RAX2	g4704.t1,g2811.t1
Aminotransferase, class I/classII	IPR004839_PF00155	Cluster_7	1	0	0	0	0	1	1	3	4	1	2	2	0	0	1	1	1	2	1	2	2	2	1	1	1	1	1			A2QHV1,A2QYE2,A2QWK9,Q58FL7	g5240.t1
Aminotransferase, class I/classII	IPR004839_PF00155	Cluster_10	0	1	1	0	0	0	1	3	1	1	2	1	1	1	1	2	2	1	1	3	1	1	1	0	0	0	1		Q7SHS1	A2QPE6	g1364.t1
Phosphoesterase domain	IPR004843_PF00149	Cluster_6	0	1	1	1	2	1	1	1	1	1	1	2	1	1	1	1	1	1	1	1	1	1	2	1	1	1	1	Q05924,Q12212	Q8NIW6	A2QGD4	g2773.t1,g15242.t1
Glycoside hydrolase, family 63	IPR004888_PF03200	Cluster_1	2	1	2	1	1	1	1	1	1	1	1	2	1	2	1	1	1	1	1	1	1	1	2	1	1	1	1	P53008	Q9HE56	A2R4S4	g10292.t1,g14520.t1
Putative phosphatase regulatory subunit	IPR005036_PF03370	Cluster_1	7	2	2	2	4	1	2	1	1	1	2	1	1	1	1	1	2	2	2	2	1	0	2	2	0	1	1	P28006,P40036,Q06216,P40187	Q7RWY4	A2QCZ2	g13876.t1,g14704.t1
Moybdenum cofactor oxidoreductase, dimerisation	IPR005066_PF03404	Cluster_1	0	0	0	0	0	0	1	1	3	2	2	2	1	1	1	1	1	2	1	1	1	2	2	1	1	0	1		P08619	A2QRD2,A2QPB9,A2QPC0	g11071.t1,g13299.t1
Molybdenum cofactor sulfurase, C-terminal	IPR005302_PF03473	Cluster_2	0	0	0	0	0	0	1	2	1	1	2	1	1	1	1	1	1	1	0	2	1	1	2	0	0	0	1		Q7S9M3	A2QMF5	g14213.t1,g5513.t1
MOSC, N-terminal beta barrel	IPR005303_PF03476	Cluster_1	1	0	0	0	0	0	1	3	2	2	3	2	1	1	1	1	2	2	1	3	1	1	2	1	2	0	1		Q7S9M3	A2QMF5,A2QVM6	g14213.t1,g5513.t1
Serine hydrolase FSH	IPR005645_PF03959	Cluster_3	0	0	0	0	0	0	0	0	3	0	2	1	2	2	1	1	0	0	0	1	1	2	0	0	0	0	1		Q7S2E5,Q7RX12	A2R021,A2R1U1,A2R020
Xanthine/uracil/vitamin C permease	IPR006043_PF00860	Cluster_2	4	1	1	1	0	2	0	1	2	2	1	1	1	1	1	1	1	1	1	1	1	1	1	1	2	0	1		Q7S3D5	A2QBM4,A2QMF8	g14499.t1
FAD dependent oxidoreductase	IPR006076_PF01266	Cluster_2	2	1	1	1	1	1	1	1	1	1	1	1	1	1	1	1	2	2	1	2	1	1	2	1	1	1	1	P32191	Q7SCB1	A2QPU3	g13515.t1,g15875.t1
FAD dependent oxidoreductase	IPR006076_PF01266	Cluster_5	0	0	0	0	0	0	0	3	2	2	2	0	0	0	0	0	1	2	2	1	1	1	2	0	0	0	1			A2QK95,A2QZN4	g3904.t1,g13478.t1
XPG-I domain	IPR006086_PF00867	Cluster_4	0	0	0	0	0	0	1	1	1	1	1	1	1	1	1	1	0	1	1	1	1	1	1	2	1	0	1		Q7RWQ0	A2QE27	g13411.t1
Glycoside hydrolase, family 2, TIM barrel	IPR006103_PF02836	Cluster_4	0	1	0	0	0	0	1	0	0	1	0	1	0	1	1	1	1	1	1	2	2	2	1	0	0	0	1				g13281.t1
NADH:ubiquinone oxidoreductase-like, 20kDa subunit	IPR006137_PF01058	Cluster_1	1	1	1	1	0	1	1	3	2	2	3	2	1	2	1	2	1	1	2	3	1	1	2	1	1	1	1		O47950	A2QHJ1,A2QXG1	g11004.t1,g14744.t1
D-isomer specific 2-hydroxyacid dehydrogenase, catalytic domain	IPR006139_PF00389	Cluster_4	0	0	0	0	0	0	1	1	2	1	0	3	0	0	0	0	1	1	3	4	2	2	2	0	0	0	1			A2R1X3,A2QH07	g8362.t1,g6126.t1
3-hydroxyacyl-CoA dehydrogenase, NAD binding	IPR006176_PF02737	Cluster_1	0	0	0	0	0	0	0	2	4	2	4	1	3	0	1	2	1	1	1	1	2	0	2	0	0	0	1		Q7SGM5,Q7SEZ4,Q7RZ80	A2QA05,A5AB90,A2QX91,A2QXC7	g4553.t1,g14644.t1
Amidohydrolase 2	IPR006992_PF04909	Cluster_1	0	0	0	0	0	0	1	1	3	1	1	1	0	1	2	2	1	2	1	3	0	0	2	1	1	0	1			A2QD22,A2QMG8,A2RA03	g32.t1,g10283.t1
Transcription factor domain, fungi	IPR007219_PF04082	Cluster_24	0	1	1	1	1	1	0	3	3	1	3	2	2	1	2	2	1	1	1	2	0	1	2	0	1	0	1	P34228	Q7RZM1,Q7SDB6	A5AAZ4,A5ABQ4,A2R6F3	g5556.t1,g1765.t1
Transcription factor domain, fungi	IPR007219_PF04082	Cluster_28	0	0	0	0	0	0	0	2	3	4	2	2	0	0	0	0	2	2	1	2	1	1	3	0	0	0	1			A2R5G4,A2QDY9,A5ABU4	g13330.t1,g14333.t1,g6275.t1
Transcription factor domain, fungi	IPR007219_PF04082	Cluster_38	0	1	0	0	0	1	0	0	1	1	2	1	0	0	1	1	1	1	1	2	1	1	2	0	0	0	1			A2QFJ5	g3136.t1,g10286.t1
Transcription factor domain, fungi	IPR007219_PF04082	Cluster_39	0	0	0	0	0	0	0	1	1	2	2	1	0	0	1	1	0	0	1	2	1	1	2	0	0	0	1			A2Q847	g15460.t1,g11792.t1
Phosphoesterase	IPR007312_PF04185	Cluster_1	0	0	0	0	0	7	0	3	3	2	2	1	1	2	1	1	1	1	1	1	3	0	1	1	1	0	1		Q8X058	A5ABC8,A2R2Q2,A2RAS0	g503.t1
Catechol dioxygenase, N-terminal	IPR007535_PF04444	Cluster_2	0	1	1	0	0	0	1	1	2	2	2	1	1	1	1	2	1	1	1	5	1	1	2	2	0	1	1		Q7SE81	A2QEL8,A2QAP8	g5176.t1,g7883.t1
Oxidoreductase, FAD-binding domain	IPR008333_PF00970	Cluster_3	0	0	0	0	0	0	1	2	3	2	2	2	1	1	1	1	0	2	1	1	1	2	2	2	1	0	1		P08619	A2QRD2,A2QPB9,A2QPC0	g11071.t1,g13299.t1
Necrosis inducing protein	IPR008701_PF05630	Cluster_2	0	0	0	0	0	0	0	0	0	0	0	1	1	2	0	0	1	1	3	2	1	5	1	0	0	0	1		Q7S4S7		g6726.t1
Peptidase S28	IPR008758_PF05577	Cluster_2	0	0	0	0	0	0	1	1	1	1	0	2	1	2	1	1	1	1	1	1	2	2	0	2	1	0	1		Q7SEA3	A2QZS1
Phytanoyl-CoA dioxygenase	IPR008775_PF05721	Cluster_5	0	0	0	0	0	0	0	1	2	1	1	1	1	1	1	2	0	0	1	1	1	0	2	0	0	0	1		Q873L6	A2QS20,A2R0T7	g2510.t1,g157.t1
Domain of unknown function DUF1338	IPR009770_PF07063	Cluster_1	0	0	0	0	0	0	0	2	1	0	1	0	0	1	0	1	0	1	1	3	1	0	2	0	0	0	1			A2QEM0	g5764.t1,g5414.t1
Protein of unknown function DUF1399	IPR009836_PF07173	Cluster_1	0	3	8	0	0	0	1	1	0	1	2	1	1	0	2	2	0	1	1	2	1	2	1	0	1	0	1		Q7SHM7		g4345.t1
Low temperature requirement A	IPR010640_PF06772	Cluster_1	0	0	0	0	0	0	1	1	1	0	0	2	0	0	1	1	2	1	1	2	0	1	0	0	0	0	1			A2R8P0
Glycosyl hydrolase, family 88	IPR010905_PF07470	Cluster_2	0	0	0	0	0	0	0	3	1	2	0	1	0	1	0	2	0	1	1	5	1	3	3	1	0	0	1			A2Q7N3	g1441.t1,g7206.t1,g11729.t1
Carbohydrate kinase PfkB	IPR011611_PF00294	Cluster_1	1	1	1	1	1	1	1	2	1	1	2	1	1	1	1	1	2	1	4	2	1	2	2	1	1	1	1	P25332	Q7RX37	A2R6C9	g8356.t1,g16108.t1
Peptidase M20, dimerisation domain	IPR011650_PF07687	Cluster_3	0	1	0	1	0	1	1	3	1	1	1	4	1	1	1	1	1	1	2	3	3	1	2	0	0	0	1		Q7S4G6	A2RBC2	g3121.t1,g14282.t1
Major facilitator superfamily	IPR011701_PF07690	Cluster_22	3	0	0	0	0	1	0	9	4	5	10	3	1	1	1	1	2	3	1	1	1	0	0	1	0	4	1		Q870R7	A2R663,A2QD68,A5ABI0,A2QMF7
Major facilitator superfamily	IPR011701_PF07690	Cluster_25	0	1	2	1	1	3	0	1	1	1	1	2	1	2	1	2	1	1	3	3	1	1	1	0	0	0	1	P47159	Q872Q4	A2Q7D1	g2088.t1
Histidinol dehydrogenase	IPR012131_PF00815	Cluster_1	1	1	1	1	1	1	1	2	2	2	1	2	1	1	1	1	1	1	1	3	1	2	2	1	1	1	1	P00815	P07685	A2QAS4,A2R4B4	g3449.t1,g6274.t1
Haemerythrin/HHE cation-binding motif	IPR012312_PF01814	Cluster_2	0	0	0	0	0	0	1	1	1	0	0	1	1	0	0	0	1	1	2	2	3	2	1	1	0	0	1		Q7SFG4	A2QF14	g10268.t1
GPI inositol-deacylase PGAP1-like	IPR012908_PF07819	Cluster_2	0	0	0	0	0	0	1	0	0	1	0	0	1	0	1	4	0	0	1	1	0	1	5	0	0	0	1		Q7SFF7		g5595.t1,g10766.t1,g15988.t1,g6234.t1,g15915.t1
Amino acid transporter, transmembrane	IPR013057_PF01490	Cluster_7	0	0	0	0	0	0	0	2	1	2	1	2	0	1	0	0	1	0	2	3	2	1	2	0	0	0	1			A2QN06	g10443.t1,g11286.t1
Histidine phosphatase superfamily, clade-1	IPR013078_PF00300	Cluster_2	0	3	5	1	1	1	1	3	2	2	2	3	0	0	1	1	1	1	2	3	2	3	2	1	1	1	1	P36069		A2QQH9,A2QND8	g7668.t1,g12114.t1
Histidine phosphatase superfamily, clade-1	IPR013078_PF00300	Cluster_4	0	1	2	1	1	1	0	2	2	1	2	2	1	1	1	1	1	2	1	2	1	1	2	1	1	1	1	P36136	Q7SH85	A2R0B4,A2R867	g10708.t1,g15980.t1
Mandelate racemase/muconate lactonizing enzyme, N-terminal	IPR013341_PF02746	Cluster_1	0	0	0	0	0	0	0	2	2	1	2	1	0	1	1	1	0	0	1	3	1	1	2	1	0	0	1			A2QI98,A2RAU0	g20.t1,g8348.t1
SMP-30/Gluconolactonase/LRE-like region	IPR013658_PF08450	Cluster_2	0	1	1	1	1	1	1	1	1	1	1	1	1	2	1	1	1	1	1	1	1	1	1	0	0	0	1	P38235	Q7RZN8	A2QIG3	g1994.t1
Shikimate dehydrogenase substrate binding, N-terminal	IPR013708_PF08501	Cluster_3	0	1	0	0	0	0	0	2	1	1	1	1	1	1	1	1	0	0	2	1	1	1	2	0	0	0	1		P11635	A2QGL3	g7498.t1,g1096.t1
Peptidase S15/CocE/NonD, C-terminal	IPR013736_PF08530	Cluster_2	0	0	0	0	0	0	0	3	3	1	1	1	1	1	0	1	0	0	1	8	1	1	4	0	1	0	1		Q7S822	A2QBR7,A2R8B6,A2QMA7	g13100.t1,g14561.t1,g7919.t1,g7046.t1
Redoxin	IPR013740_PF08534	Cluster_1	1	2	2	2	1	1	0	2	2	2	2	1	1	1	1	1	1	1	1	1	1	1	1	1	1	1	1	P38013	Q7SDU1	A2R0G9,A2R6R3	g12718.t1
Domain of unknown function DUF1793	IPR014870_PF08760	Cluster_1	0	0	0	0	0	0	1	3	4	3	3	2	2	2	1	1	1	1	0	0	1	0	0	1	1	3	1		Q7RW73,Q9HE46	A2QF95,A5AA65,A2Q916,A2QX81
Domain of unknown function DUF1965	IPR015328_PF09248	Cluster_1	0	0	0	2	0	0	1	1	0	1	0	3	1	1	0	0	1	1	2	1	2	0	2	1	0	0	1		Q7S286		g160.t1,g10163.t1
Fumarylacetoacetase, N-terminal	IPR015377_PF09298	Cluster_1	1	0	0	0	0	0	1	1	1	1	1	1	1	1	1	1	1	1	2	3	1	2	2	0	1	0	1		Q7S6Q3	A2QVP5	g7527.t1,g11743.t1
Copper amine oxidase, C-terminal	IPR015798_PF01179	Cluster_2	0	0	0	2	0	0	1	1	0	1	0	3	1	2	0	0	1	1	2	1	2	0	2	1	0	0	1		Q7S286		g160.t1,g10163.t1
Mitochondrial substrate/solute carrier	IPR018108_PF00153	Cluster_8	2	1	1	1	1	1	1	2	2	1	1	1	1	1	1	1	1	1	1	1	1	1	2	1	1	2	1	Q04013	Q9P691	A2QEH5,A2QUT0	g5476.t1,g6244.t1
Alkaline phosphatase D-related	IPR018946_PF09423	Cluster_1	0	0	0	0	0	0	2	1	0	1	1	3	3	1	0	0	1	1	1	1	1	0	2	1	1	0	1		Q7S495,Q9P5V2,Q9P5V3		g15543.t1,g7869.t1
GTP cyclohydrolase I domain	IPR020602_PF01227	Cluster_1	0	1	1	1	1	1	2	2	1	1	2	1	1	2	1	3	1	2	1	1	1	1	1	1	1	1	1	P51601	P51599	A2QUD9	g6107.t1
Glyceraldehyde 3-phosphate dehydrogenase, NAD(P) binding domain	IPR020828_PF00044	Cluster_1	4	3	1	1	3	1	1	3	1	2	1	1	1	1	1	1	1	1	1	1	1	1	2	1	1	1	1	P00360,P00358,P00359	P54118	A2R704	g3952.t1,g4281.t1
Glyceraldehyde 3-phosphate dehydrogenase, catalytic domain	IPR020829_PF02800	Cluster_1	4	3	1	1	3	1	1	3	1	2	1	1	1	1	1	1	1	1	1	1	1	1	2	1	1	1	1	P00360,P00358,P00359	P54118	A2R704	g3952.t1,g4281.t1
Protein of unknown function DUF3433	IPR021840_PF11915	Cluster_2	0	0	0	0	0	0	1	1	1	0	1	1	0	1	1	1	0	0	2	4	2	2	2	0	0	0	1			A2R1J9	g2542.t1,g7717.t1
Protein of unknown function DUF3468	IPR021858_PF11951	Cluster_3	0	0	0	0	0	0	0	0	0	0	0	1	0	1	2	5	1	1	2	5	1	1	0	0	0	0	1
Glucose receptor Git3, N-terminal	IPR023041_PF11710	Cluster_1	0	0	0	0	0	0	1	2	2	3	2	2	0	3	1	1	0	0	1	2	4	1	0	0	0	2	1			A2QBX6,A2R1I4
NADP-dependent oxidoreductase domain	IPR023210_PF00248	Cluster_5	0	0	0	0	0	0	0	0	0	0	1	0	1	1	0	1	0	1	1	4	1	1	2	0	0	0	1		Q7S2E8		g3353.t1,g9243.t1
Autophagy-related protein 22-like	IPR024671_PF11700	Cluster_2	2	0	0	0	0	0	0	2	1	2	2	1	0	1	1	1	2	2	1	1	1	0	0	2	1	1	1			A2QCF0
AMP-binding enzyme C-terminal domain	IPR025110_PF13193	Cluster_5	2	0	1	1	0	1	2	3	3	3	3	3	1	2	1	1	1	1	1	1	2	1	2	0	1	0	1		Q7S4F3	A2QPE7,A2R4X6,A2QCE9	g1337.t1,g12101.t1
Proton-dependent oligopeptide transporter family	IPR000109_PF00854	Cluster_2	2	2	1	0	1	1	3	3	1	1	1	2	0	0	1	1	1	1	1	1	1	0	0	0	0	0	1	P32901		A2QYH1
Amidase	IPR000120_PF01425	Cluster_5	0	0	0	0	0	0	1	1	2	2	1	1	1	0	0	1	1	1	1	1	0	1	0	0	0	0	1		Q7S8T1	A2QVX6,A2QT67
Forkhead-associated (FHA) domain	IPR000253_PF00498	Cluster_8	0	0	0	0	0	0	0	0	0	0	0	0	1	1	1	1	1	0	1	1	1	1	0	0	0	0	1		Q7S7S9
Ribosomal protein S17	IPR000266_PF00366	Cluster_2	0	0	0	0	0	0	0	0	0	0	0	0	0	0	1	1	0	1	1	1	1	1	0	0	0	0	1
Glycoside hydrolase, family 31	IPR000322_PF01055	Cluster_5	0	0	0	0	0	0	0	1	0	1	0	1	1	1	0	0	2	2	1	1	0	1	0	0	0	0	1		Q7S081
RNA recognition motif domain	IPR000504_PF00076	Cluster_11	0	0	0	0	0	0	0	0	1	1	0	0	1	1	1	1	0	0	1	0	1	1	0	0	0	0	1		Q7RUX3	A2R2Q5
RNA recognition motif domain	IPR000504_PF00076	Cluster_30	0	0	0	0	0	0	0	0	0	0	0	0	0	0	1	1	1	1	1	1	1	1	0	0	0	0	1
RNA recognition motif domain	IPR000504_PF00076	Cluster_34	0	0	0	0	0	0	0	0	0	0	0	0	0	0	1	1	1	1	1	1	1	0	0	0	0	0	1
RNA recognition motif domain	IPR000504_PF00076	Cluster_36	0	0	0	0	0	0	0	0	0	0	0	0	0	0	1	1	1	1	1	1	0	0	0	0	0	0	1
RNA recognition motif domain	IPR000504_PF00076	Cluster_37	0	0	0	0	0	0	0	0	0	0	0	0	1	0	1	1	1	0	0	0	1	1	0	0	0	0	1		Q7S6F4
Zinc finger, CCCH-type	IPR000571_PF00642	Cluster_7	0	0	0	0	0	0	0	0	1	0	1	1	0	0	1	1	0	0	1	1	1	1	0	0	0	0	1			A2QU28
Zinc finger, CCCH-type	IPR000571_PF00642	Cluster_8	0	0	0	0	0	0	0	0	0	1	1	0	0	0	1	1	1	1	1	0	1	0	0	0	0	0	1
Ubiquitin-conjugating enzyme, E2	IPR000608_PF00179	Cluster_5	0	0	0	0	0	0	1	1	1	1	1	1	0	0	1	1	1	1	1	1	1	1	0	0	0	0	1			A2QWY5
Ubiquitin-conjugating enzyme, E2	IPR000608_PF00179	Cluster_10	0	0	0	0	0	0	0	0	0	0	0	0	0	1	1	1	1	1	1	1	1	1	0	0	0	0	1
Ubiquitin-conjugating enzyme, E2	IPR000608_PF00179	Cluster_11	0	0	0	0	0	0	0	0	0	0	0	0	0	0	1	1	1	1	1	1	1	0	0	0	0	0	1
Ubiquitin-conjugating enzyme, E2	IPR000608_PF00179	Cluster_12	0	0	0	0	0	0	0	0	0	0	0	0	0	0	1	1	0	1	0	1	1	1	0	0	0	0	1
Ubiquitin-conjugating enzyme, E2	IPR000608_PF00179	Cluster_13	0	0	0	0	0	0	0	0	0	0	0	0	0	0	1	1	1	1	1	1	0	0	0	0	0	0	1
Proteolipid membrane potential modulator	IPR000612_PF01679	Cluster_2	3	0	1	1	0	0	1	0	1	0	1	1	1	1	1	1	0	0	1	1	1	0	0	1	0	1	1		Q871V2	A2QDR5
Ubiquitin domain	IPR000626_PF00240	Cluster_11	0	0	0	0	0	0	1	0	0	1	0	0	1	0	0	0	1	1	1	1	1	0	0	0	0	0	1		Q7RZ71
Oxysterol-binding protein	IPR000648_PF01237	Cluster_6	0	0	0	0	0	0	0	0	0	0	0	0	1	1	0	0	0	0	1	2	1	1	0	0	0	0	1		Q7S4D0
Cutinase	IPR000675_PF01083	Cluster_3	0	0	0	0	0	0	0	0	0	0	0	0	1	0	1	1	1	1	1	1	1	1	0	0	0	0	1		Q7S260
Glycoside hydrolase, family 16	IPR000757_PF00722	Cluster_9	0	0	0	0	0	0	0	0	0	0	1	1	0	0	1	1	1	1	1	1	0	0	0	0	0	0	1
GPR1/FUN34/yaaH	IPR000791_PF01184	Cluster_3	0	0	0	0	0	0	0	0	0	0	0	0	0	0	1	1	1	1	1	1	0	0	0	0	0	0	1
SANT/Myb domain	IPR001005_PF00249	Cluster_10	1	0	0	0	0	0	0	0	0	0	1	0	1	1	1	1	0	0	0	0	1	1	0	0	1	1	1		Q7S305
Zn(2)-C6 fungal-type DNA-binding domain	IPR001138_PF00172	Cluster_60	0	2	0	0	0	0	0	0	0	0	0	0	1	1	1	1	0	0	1	6	1	0	0	0	0	0	1		Q7S6B3
Zn(2)-C6 fungal-type DNA-binding domain	IPR001138_PF00172	Cluster_63	0	0	0	0	0	0	0	0	0	0	1	0	2	1	1	2	0	0	1	1	1	3	0	0	0	0	1		Q7SAV4,Q8X0T1
Zn(2)-C6 fungal-type DNA-binding domain	IPR001138_PF00172	Cluster_80	0	0	0	0	0	0	0	0	0	1	1	0	0	1	0	0	1	1	1	1	0	1	0	0	1	0	1
Zn(2)-C6 fungal-type DNA-binding domain	IPR001138_PF00172	Cluster_81	0	0	0	0	0	0	0	0	0	0	0	0	0	0	1	1	1	1	1	1	0	1	0	0	0	0	1
Zn(2)-C6 fungal-type DNA-binding domain	IPR001138_PF00172	Cluster_83	0	0	0	0	0	0	0	0	0	0	1	0	0	0	1	1	1	1	1	1	0	1	0	0	0	0	1
Ribosomal protein L21e	IPR001147_PF01157	Cluster_1	0	0	0	0	0	0	0	0	0	0	0	0	0	0	1	1	1	1	1	1	0	0	0	0	0	0	1
Zinc finger, TFIIS-type	IPR001222_PF01096	Cluster_2	0	0	0	0	0	0	0	0	0	0	0	0	0	1	1	1	0	1	1	1	1	0	0	0	0	0	1
Peptidase S1	IPR001254_PF00089	Cluster_1	0	0	0	0	0	0	0	1	0	1	0	2	0	0	1	1	10	26	1	1	0	1	0	0	0	0	1
Beta-lactamase-like	IPR001279_PF00753	Cluster_5	0	0	0	0	0	0	0	3	3	1	0	1	0	0	1	2	2	3	0	5	1	1	0	0	0	0	1			A2R1S6,A2Q9I9,A2QGI5
Histidine triad (HIT) protein	IPR001310_PF01230	Cluster_3	0	0	0	0	1	0	0	1	1	1	0	0	1	1	0	1	1	1	0	0	1	1	0	0	0	0	1	Q08702	Q7S845	A2R633
	IPR001357_PF00533	Cluster_8	0	0	0	0	0	0	1	1	0	0	2	1	0	1	1	1	1	1	1	1	0	1	0	0	0	0	1
Macrophage migration inhibitory factor	IPR001398_PF01187	Cluster_1	0	0	0	0	0	0	1	0	0	0	0	1	1	1	0	1	0	1	1	1	1	1	0	0	0	0	1		Q7RYS9
Aspartic peptidase	IPR001461_PF00026	Cluster_14	0	0	0	0	0	0	0	0	0	0	0	0	0	0	1	1	1	1	1	1	0	0	0	0	0	0	1
Glycoside hydrolase, family 5	IPR001547_PF00150	Cluster_7	0	0	0	0	0	0	0	1	0	1	0	1	0	0	1	2	1	1	2	3	1	0	0	0	0	0	1
Aromatic amino acid beta-eliminating lyase/threonine aldolase	IPR001597_PF01212	Cluster_9	0	0	0	0	0	0	0	1	1	1	1	0	0	0	1	1	1	1	1	3	1	0	0	0	0	0	1			A2QM37
Leucine-rich repeat	IPR001611_PF00560	Cluster_1	4	1	1	0	1	1	0	0	0	0	1	0	0	1	1	1	0	0	0	1	1	1	0	1	0	0	1	P08678
DnaJ domain	IPR001623_PF00226	Cluster_19	0	0	0	0	0	0	0	0	0	0	0	0	0	0	1	1	1	1	1	1	0	0	0	0	0	0	1
DnaJ domain	IPR001623_PF00226	Cluster_20	0	0	0	0	0	0	0	0	0	0	0	0	0	0	1	1	1	1	1	1	0	0	0	0	0	0	1
Helicase, C-terminal	IPR001650_PF00271	Cluster_21	0	0	0	0	0	0	0	1	1	0	1	1	1	1	1	1	0	2	1	0	0	1	0	0	0	0	1		Q7RYD5	A2R2S0
WD40 repeat	IPR001680_PF00400	Cluster_90	0	0	0	0	0	0	0	0	0	0	0	0	0	0	1	1	1	0	1	2	1	0	0	0	0	0	1
Small GTPase superfamily	IPR001806_PF00071	Cluster_7	0	0	0	0	0	0	0	0	0	0	0	0	1	0	1	1	0	0	1	1	1	1	0	0	0	0	1		Q7SFE2
Small GTPase superfamily	IPR001806_PF00071	Cluster_8	0	0	0	0	0	0	0	0	0	0	0	0	0	0	1	1	1	1	1	1	1	0	0	0	0	0	1
DSBA-like thioredoxin domain	IPR001853_PF01323	Cluster_4	0	0	0	0	0	0	0	0	0	0	0	0	0	0	1	1	1	1	1	1	0	0	0	0	0	0	1
EF-hand domain	IPR002048_PF00036	Cluster_3	0	0	0	1	1	1	1	1	1	0	1	1	1	0	1	1	1	0	1	1	1	0	0	1	0	1	1	Q06389	Q7RZ93	A2QLH2
Phospholipid/glycerol acyltransferase	IPR002123_PF01553	Cluster_6	1	0	0	1	0	1	0	1	0	0	0	0	0	1	1	1	1	1	1	1	1	0	0	0	0	0	1
Ribosomal protein L5	IPR002132_PF00281	Cluster_2	0	0	0	0	0	0	0	0	0	0	0	1	0	1	1	1	1	0	1	1	0	0	0	0	0	0	1
Short-chain dehydrogenase/reductase SDR	IPR002198_PF00106	Cluster_8	0	0	0	0	0	0	1	0	1	0	1	0	1	1	1	1	0	1	1	1	0	0	0	0	0	0	1		Q873F6	A2QRX3
Short-chain dehydrogenase/reductase SDR	IPR002198_PF00106	Cluster_36	0	0	0	0	0	0	0	0	0	0	0	0	0	1	1	1	0	1	1	1	1	2	0	0	0	0	1
Short-chain dehydrogenase/reductase SDR	IPR002198_PF00106	Cluster_58	0	0	0	0	0	0	0	0	0	0	0	0	0	0	1	1	1	1	1	1	0	0	0	0	0	0	1
Short-chain dehydrogenase/reductase SDR	IPR002198_PF00106	Cluster_62	0	0	0	0	0	0	0	0	0	0	0	0	0	0	1	1	1	1	1	1	0	0	0	0	0	0	1
Short-chain dehydrogenase/reductase SDR	IPR002198_PF00106	Cluster_76	0	0	0	0	0	0	0	0	0	0	0	0	0	0	1	1	1	1	1	1	0	0	0	0	0	0	1
UDP-glucuronosyl/UDP-glucosyltransferase	IPR002213_PF00201	Cluster_3	12	0	0	0	0	0	1	0	2	0	0	0	1	0	0	0	1	1	1	1	1	2	0	1	1	0	1		Q7S0K9	A2QXI0,A2R863
3-beta hydroxysteroid dehydrogenase/isomerase	IPR002225_PF01073	Cluster_20	0	0	0	0	0	0	0	0	0	0	0	0	0	0	1	1	1	1	0	0	1	1	0	0	0	0	1
Glycoside hydrolase, family 12	IPR002594_PF01670	Cluster_2	0	0	0	0	0	0	0	1	0	0	1	0	0	0	1	1	1	1	1	1	1	1	0	0	0	0	1
BolA protein	IPR002634_PF01722	Cluster_1	0	0	0	0	0	0	0	0	0	0	0	0	0	0	1	1	1	1	0	0	1	1	0	0	0	0	1
Ribosomal protein L29e	IPR002673_PF01779	Cluster_1	0	0	0	0	0	0	1	0	0	0	0	0	1	1	0	1	1	1	1	0	1	0	0	0	0	0	1		Q7RZP9
Zinc finger, C6HC-type	IPR002867_PF01485	Cluster_5	0	0	0	0	0	0	0	0	0	0	0	0	0	0	2	1	1	1	1	2	1	0	0	1	0	0	1
Carbohydrate-binding WSC	IPR002889_PF01822	Cluster_8	0	0	0	0	0	0	0	0	0	0	0	0	0	0	1	1	1	1	1	0	1	0	0	0	0	0	1
Frataxin/CyaY	IPR002908_PF01491	Cluster_1	0	0	0	0	0	0	0	0	0	0	0	1	1	1	1	1	1	1	1	1	1	1	0	0	0	0	1		Q7S0W3
Dienelactone hydrolase	IPR002925_PF01738	Cluster_7	0	0	0	0	0	0	0	0	1	1	1	0	0	1	1	1	1	1	0	1	0	1	0	0	0	0	1			A2QII9
O-methyltransferase, family 3	IPR002935_PF01596	Cluster_2	1	1	1	0	0	1	0	3	3	3	1	1	1	0	0	2	0	0	1	1	1	1	0	0	0	0	1		Q7S9Z9	A2QIU0,A2R957,A2R579
RNA-binding S4 domain	IPR002942_PF01479	Cluster_3	3	2	2	1	1	1	0	1	1	1	1	1	1	1	0	0	1	1	1	1	1	1	0	1	0	1	1	P05753	Q7SE03	A2QXM5
PAN-1 domain	IPR003014_PF00024	Cluster_1	0	0	0	0	0	0	0	1	0	0	0	0	1	1	1	1	0	0	1	1	0	0	0	0	0	0	1		Q7S109
Growth-arrest-specific protein 2 domain	IPR003108_PF02187	Cluster_1	0	0	0	0	0	0	1	0	1	1	0	1	0	0	1	1	1	1	0	1	1	0	0	0	0	0	1			A2R4T7
Dynamin GTPase effector	IPR003130_PF02212	Cluster_2	0	0	0	0	0	0	0	0	1	1	0	1	0	1	1	1	1	1	1	1	1	1	0	3	0	0	1			A2QVR7
Proteinase inhibitor, carboxypeptidase propeptide	IPR003146_PF02244	Cluster_1	0	0	0	0	0	0	2	0	0	0	0	1	1	1	1	1	2	2	0	0	1	0	0	0	0	0	1		Q7S312
CDC48, N-terminal subdomain	IPR003338_PF02359	Cluster_2	1	1	1	1	1	0	1	1	1	1	1	1	1	1	1	0	0	0	1	1	0	1	0	0	0	1	1	P18759	Q873H3	Q9C455
JmjC domain	IPR003347_PF02373	Cluster_5	0	0	0	0	0	0	0	0	0	0	0	0	0	1	1	1	1	1	1	1	0	0	0	0	0	0	1
Fringe-like	IPR003378_PF02434	Cluster_3	0	0	0	0	0	0	1	1	1	1	1	2	0	0	2	2	1	1	1	1	0	1	0	0	0	0	1			A2QTC1
Batten's disease protein Cln3	IPR003492_PF02487	Cluster_2	0	0	0	0	0	0	0	0	0	0	0	0	0	0	1	1	0	1	1	1	1	0	0	0	0	0	1
Histidine kinase-like ATPase, ATP-binding domain	IPR003594_PF02518	Cluster_5	3	0	0	1	2	1	0	0	1	1	1	0	1	0	0	1	0	0	1	1	1	1	0	2	0	0	1	P15108,P02829	Q9C2E7	A2QUS2
Ppx/GppA phosphatase	IPR003695_PF02541	Cluster_1	0	0	0	1	1	1	1	2	1	1	1	1	0	0	1	1	1	0	2	2	0	1	0	0	0	0	1	P32608		A2QVK0
Aspartyl/glutamyl-tRNA(Asn/Gln) amidotransferase, C subunit	IPR003837_PF02686	Cluster_1	0	0	0	0	0	0	0	0	0	0	0	1	0	1	1	1	0	0	1	1	1	0	0	0	0	0	1
Protein of unknown function DUF227	IPR004119_PF02958	Cluster_2	0	0	0	0	0	0	0	1	1	1	1	1	0	1	1	1	1	1	1	1	1	1	0	1	1	0	1			A2QXA5
Glycerophosphoryl diester phosphodiesterase	IPR004129_PF03009	Cluster_3	1	0	0	0	0	1	1	0	1	1	1	1	1	1	0	1	0	1	1	0	1	0	0	1	1	1	1		Q01317	A2QHK8
BAR domain	IPR004148_PF03114	Cluster_7	0	0	0	0	0	0	0	0	0	0	0	0	1	1	1	1	0	1	1	1	0	0	0	0	0	0	1		Q7SGV1
MHCK/EF2 kinase	IPR004166_PF02816	Cluster_3	0	0	0	0	0	0	1	1	0	0	0	0	0	1	1	1	1	1	0	1	0	0	0	0	0	0	1
OB-fold nucleic acid binding domain, AA-tRNA synthetase-type	IPR004365_PF01336	Cluster_5	0	0	0	0	0	0	1	1	0	0	0	1	1	1	1	1	1	1	1	1	1	1	0	0	0	0	1		Q7S8S2
Triose-phosphate transporter domain	IPR004853_PF03151	Cluster_6	3	0	0	0	0	1	0	0	0	0	0	0	1	0	1	1	1	1	1	1	1	1	0	1	0	1	1		Q7S227
Glycoside hydrolase, family 61	IPR005103_PF03443	Cluster_1	0	0	0	0	0	0	0	0	0	0	0	0	0	0	1	1	1	1	1	1	1	1	0	0	0	0	1
Glycoside hydrolase, family 61	IPR005103_PF03443	Cluster_3	0	0	0	0	0	0	0	0	0	0	0	0	1	0	1	1	0	0	1	1	1	0	0	0	0	0	1		Q7S111
Oxoglutarate/iron-dependent dioxygenase	IPR005123_PF03171	Cluster_7	0	0	0	0	0	0	0	0	0	0	1	0	1	1	1	1	0	1	0	0	1	1	0	0	0	0	1		Q7RZ55
Alpha-acetolactate decarboxylase	IPR005128_PF03306	Cluster_1	0	0	0	0	0	0	0	0	0	0	0	1	1	1	1	2	0	0	1	1	1	0	0	0	0	0	1		Q7S2S3
Endonuclease/exonuclease/phosphatase	IPR005135_PF03372	Cluster_24	0	0	0	0	0	0	0	0	0	0	0	0	1	1	0	0	0	0	1	1	1	1	0	0	0	0	1		Q7SC34
Glycoside hydrolase, family 71	IPR005197_PF03659	Cluster_2	0	0	0	0	0	0	0	4	2	3	4	0	1	0	3	3	1	1	0	1	0	0	0	0	0	0	1		Q7S2E7	A2QLA5,A2QP93
Peptidase C69, dipeptidase A	IPR005322_PF03577	Cluster_1	0	0	0	0	0	0	0	0	0	0	0	1	0	1	0	0	1	1	1	1	1	0	0	0	0	0	1
Erg28	IPR005352_PF03694	Cluster_1	0	0	0	0	0	0	0	0	0	0	0	0	0	0	1	1	1	1	1	1	0	0	0	0	0	0	1
ADP-ribosylation/Crystallin J1	IPR005502_PF03747	Cluster_1	0	0	0	0	0	0	1	1	0	0	0	1	1	0	1	1	1	1	1	1	0	0	0	0	0	0	1		Q7S1M3
Aminotransferase class-III	IPR005814_PF00202	Cluster_8	0	0	0	0	0	0	0	0	0	0	0	0	0	0	1	1	1	1	1	1	0	0	0	0	0	0	1
FAD dependent oxidoreductase	IPR006076_PF01266	Cluster_28	0	0	0	0	0	0	0	0	0	0	0	0	0	0	1	1	1	1	1	1	1	1	0	0	0	0	1
XPG N-terminal	IPR006085_PF00752	Cluster_5	1	0	0	0	0	1	0	1	1	0	1	0	1	0	0	1	1	1	1	1	0	0	0	1	1	1	1		Q9HE61	A2RA58
RNA polymerase archaeal subunit P/eukaryotic subunit RPC10	IPR006591_PF03604	Cluster_1	0	0	0	0	0	0	0	0	0	0	0	0	0	0	1	1	1	1	1	1	0	0	0	0	0	0	1
Peptidase C19, ubiquitin-specific peptidase, DUSP domain	IPR006615_PF06337	Cluster_1	0	0	0	0	0	0	1	1	1	1	1	1	1	0	1	1	1	1	1	1	0	1	0	0	1	0	1		Q7RWU7	A2QBW2
Thioesterase superfamily	IPR006683_PF03061	Cluster_7	0	0	0	0	0	0	0	0	0	0	0	0	0	0	1	1	1	1	1	1	1	1	0	0	0	0	1
Hyaluronan/mRNA-binding protein	IPR006861_PF04774	Cluster_2	0	0	0	0	0	0	0	0	0	0	0	0	1	1	1	0	0	0	1	1	0	1	0	0	0	0	1		Q7RZY6
Glutathione-dependent formaldehyde-activating enzyme/centromere protein V	IPR006913_PF04828	Cluster_5	0	0	0	0	0	0	0	0	0	0	0	0	0	0	1	1	1	1	0	1	1	1	0	0	0	0	1
Glutathione-dependent formaldehyde-activating enzyme/centromere protein V	IPR006913_PF04828	Cluster_7	0	0	0	0	0	0	0	0	0	0	0	0	0	0	1	1	0	0	1	1	1	1	0	0	0	0	1
Amidohydrolase 2	IPR006992_PF04909	Cluster_2	1	0	1	0	0	0	1	0	0	0	0	0	0	1	1	1	0	1	1	1	0	1	0	0	1	1	1
LicD	IPR007074_PF04991	Cluster_3	0	0	0	0	0	0	1	0	1	1	0	1	1	0	1	1	1	1	0	1	1	1	0	0	0	0	1		Q7SGV6	A2RAQ0
Zinc finger, C2H2	IPR007087_PF00096	Cluster_23	0	0	0	0	0	0	0	0	0	1	1	0	0	1	0	1	0	0	1	3	1	1	0	0	0	0	1
Nnf1	IPR007128_PF03980	Cluster_1	0	0	0	0	0	0	0	0	0	0	0	0	0	0	1	1	1	1	1	1	0	0	0	0	0	0	1
Transcription factor domain, fungi	IPR007219_PF04082	Cluster_50	0	0	0	0	0	0	0	1	1	1	1	1	1	0	1	1	0	1	1	1	1	0	0	0	0	0	1		Q96UE1	A2QUC8
Phosphoesterase	IPR007312_PF04185	Cluster_2	1	0	0	0	0	0	1	1	1	0	0	0	0	0	1	1	4	4	1	1	0	0	0	0	0	0	1			A2QAD7
Protein of unknown function DUF543	IPR007512_PF04418	Cluster_1	0	0	0	0	0	0	1	0	0	1	1	1	1	1	1	1	1	1	1	0	1	1	0	0	0	0	1		Q7RYI0
RTA-like protein	IPR007568_PF04479	Cluster_1	0	0	0	0	0	0	0	0	0	0	0	0	0	0	1	1	1	2	1	1	0	0	0	0	0	0	1
RTA-like protein	IPR007568_PF04479	Cluster_2	0	0	0	0	0	0	0	0	0	0	0	0	0	0	1	1	1	1	1	1	1	1	0	0	0	0	1
Glycosyltransferase, DXD sugar-binding motif	IPR007577_PF04488	Cluster_4	0	0	0	0	0	0	0	1	1	0	1	1	2	1	1	1	1	1	1	2	1	0	0	0	0	0	1		Q7SA25,Q7S3L1	A2QKX3
Hypoxia induced protein, domain	IPR007667_PF04588	Cluster_2	0	0	0	0	0	0	0	0	0	0	0	0	0	0	1	1	1	1	1	1	1	1	0	0	0	0	1
Ribosomal protein L49/IMG2	IPR007740_PF05046	Cluster_1	0	0	0	0	0	0	0	0	0	0	0	0	0	0	1	1	1	1	1	1	1	1	0	0	0	0	1
Ribosomal protein/NADH dehydrogenase domain	IPR007741_PF05047	Cluster_2	0	0	0	0	0	0	0	0	0	0	0	0	0	0	1	1	1	1	1	1	0	0	0	0	0	0	1
Putative Ig	IPR008009_PF05345	Cluster_1	0	1	1	0	1	0	0	0	1	1	0	1	1	0	1	1	1	1	1	0	1	0	0	0	0	0	1	P38928	Q872D7	A2QQ02
Cytochrome b-c1 complex subunit 9	IPR008027_PF05365	Cluster_1	2	0	0	0	0	1	1	1	0	1	0	0	1	1	1	1	0	0	1	0	1	0	0	0	0	0	1		Q7SGT7
NmrA-like	IPR008030_PF05368	Cluster_3	0	0	0	0	0	0	0	0	0	0	0	0	0	0	1	3	1	1	1	2	1	1	0	0	0	0	1
NmrA-like	IPR008030_PF05368	Cluster_4	0	0	0	0	0	0	1	1	1	0	0	0	1	0	1	0	0	0	1	1	1	1	0	0	0	0	1		Q7S0C8	A2Q962
NmrA-like	IPR008030_PF05368	Cluster_10	0	0	0	0	0	0	0	0	0	0	0	0	0	0	1	1	1	1	1	1	0	0	0	0	0	0	1
Domain of unknown function DUF125, transmembrane	IPR008217_PF01988	Cluster_2	2	0	0	0	0	0	0	0	0	0	0	0	1	0	1	1	2	1	1	1	0	0	0	0	0	0	1		Q7S534
Domain of unknown function DUF125, transmembrane	IPR008217_PF01988	Cluster_3	0	0	0	0	0	0	0	0	0	0	0	0	0	0	1	1	1	1	1	1	0	0	0	0	0	0	1
ATPase, F0 complex, subunit E, mitochondrial	IPR008386_PF05680	Cluster_1	0	0	0	0	0	0	0	0	0	0	0	0	0	0	1	1	1	1	1	1	0	0	0	0	0	0	1
ATPase, V0 complex, subunit e1/e2	IPR008389_PF05493	Cluster_1	0	0	0	0	0	0	0	0	0	0	0	1	0	1	1	1	0	1	0	1	1	1	0	0	0	0	1
Propeptide, carboxypeptidase Y	IPR008442_PF05388	Cluster_1	0	1	3	1	1	1	1	1	1	1	1	1	1	0	0	0	1	1	1	0	1	1	0	0	0	0	1	P00729	Q7RXW8	A5AB21
Galactosyl transferase	IPR008630_PF05637	Cluster_2	0	0	0	0	0	0	0	0	0	0	1	1	0	0	1	1	1	1	1	1	0	2	0	0	0	0	1
High mobility group box domain	IPR009071_PF00505	Cluster_6	0	0	0	0	0	1	0	0	0	0	0	1	0	1	1	1	0	0	1	1	1	1	0	0	0	0	1
High mobility group box domain	IPR009071_PF00505	Cluster_7	0	0	0	0	0	0	0	0	0	1	0	0	0	1	1	1	1	0	1	0	1	1	0	0	0	0	1
Protein of unknown function DUF925	IPR009267_PF06042	Cluster_1	0	0	0	0	0	0	0	0	0	0	0	0	0	0	0	0	1	1	1	1	1	1	0	0	0	0	1
AIG2-like	IPR009288_PF06094	Cluster_2	0	0	0	0	0	0	1	0	0	1	0	0	0	0	1	1	1	1	2	2	0	0	0	0	0	0	1
Protein of unknown function DUF1304	IPR009732_PF06993	Cluster_1	0	0	0	0	0	0	0	0	0	0	0	1	0	1	1	1	1	1	1	1	1	1	0	0	0	0	1
Protein of unknown function DUF1349	IPR009784_PF07081	Cluster_1	0	0	0	0	0	0	0	0	0	0	0	0	0	0	1	1	1	1	1	1	0	0	0	0	0	0	1
Polyketide cyclase SnoaL-like domain	IPR009959_PF07366	Cluster_2	0	0	0	0	0	0	0	0	0	0	0	0	1	1	0	1	0	0	1	2	2	0	0	0	0	0	1		Q7SFH5
Protein of unknown function DUF924	IPR010323_PF06041	Cluster_1	0	0	0	0	0	0	0	0	0	1	1	0	0	0	1	1	1	1	1	2	1	1	0	0	0	0	1
Ribosomal L11 methyltransferase, PrmA	IPR010456_PF06325	Cluster_1	0	0	0	1	0	1	0	0	0	0	0	1	1	1	0	0	1	1	1	1	1	0	0	0	2	0	1		Q9P6B1
Low temperature requirement A	IPR010640_PF06772	Cluster_2	0	1	1	1	0	0	0	1	0	0	0	0	0	0	1	1	1	1	1	1	0	0	0	0	1	0	1
Heterokaryon incompatibility	IPR010730_PF06985	Cluster_1	0	0	0	0	0	0	0	2	3	0	0	0	0	0	2	2	1	1	1	2	0	0	0	0	0	0	1			A2QGH1,A2QYW7,A2QIS7
Heterokaryon incompatibility	IPR010730_PF06985	Cluster_11	0	0	0	0	0	0	0	0	0	0	0	0	0	0	1	1	1	1	1	1	0	0	0	0	0	0	1
Heterokaryon incompatibility	IPR010730_PF06985	Cluster_12	0	0	0	0	0	0	0	0	0	0	0	0	0	0	1	1	1	1	1	1	0	0	0	0	0	0	1
Heterokaryon incompatibility	IPR010730_PF06985	Cluster_16	0	0	0	0	0	0	0	0	0	0	0	0	1	0	0	0	1	1	1	2	1	0	0	0	0	0	1		Q7SAV5
Bicarbonate transporter, C-terminal	IPR011531_PF00955	Cluster_2	0	0	0	0	0	0	1	1	1	0	0	0	1	0	0	0	1	1	1	1	1	1	0	0	0	0	1		Q7SE53	A2QN91
DNA/RNA helicase, DEAD/DEAH box type, N-terminal	IPR011545_PF00270	Cluster_10	0	0	1	1	0	1	1	0	1	0	1	1	1	1	1	1	1	1	1	1	0	0	0	0	1	0	1		Q7SDF3	A2Q8R2
DNA/RNA helicase, DEAD/DEAH box type, N-terminal	IPR011545_PF00270	Cluster_21	0	0	0	0	0	0	0	1	1	0	1	1	1	1	1	1	0	2	1	0	0	1	0	0	0	0	1		Q7RYD5	A2R2S0
EF-hand domain pair	IPR011992_PF13499	Cluster_6	0	0	0	0	0	0	1	1	1	1	1	0	1	1	1	1	1	1	1	1	0	1	0	1	0	0	1		Q9C2K1	A2QMR7
Mitochondrial import receptor subunit TOM7	IPR012621_PF08038	Cluster_1	0	0	0	0	0	0	0	0	0	1	0	1	1	1	0	1	0	0	1	1	1	0	0	0	0	0	1		Q9C1J0
BTB/POZ	IPR013069_PF00651	Cluster_7	0	0	0	0	0	0	0	0	0	0	0	1	0	1	1	1	1	1	1	1	1	0	0	0	0	0	1
Alpha/beta hydrolase fold-3	IPR013094_PF07859	Cluster_15	0	0	0	0	0	0	0	0	0	0	0	0	0	0	1	1	1	1	1	1	0	0	0	0	0	0	1
Tetratricopeptide TPR2	IPR013105_PF07719	Cluster_14	1	0	0	0	0	1	1	1	1	0	0	1	1	1	1	1	0	0	0	0	1	1	0	0	0	0	1		Q7RXN8	A2RAM7
Tetratricopeptide TPR2	IPR013105_PF07719	Cluster_25	0	0	0	0	0	0	0	0	0	0	0	0	0	1	1	1	1	1	1	1	1	1	0	0	0	0	1
3-Oxoacyl-[acyl-carrier-protein (ACP)] synthase III	IPR013751_PF08545	Cluster_1	0	0	0	0	0	0	1	2	1	2	2	1	1	1	1	0	1	1	1	1	1	1	0	0	0	0	1		Q873I6	A2QHR0
Ketopantoate reductase ApbA/PanE, C-terminal	IPR013752_PF08546	Cluster_7	0	0	0	0	0	0	0	0	0	0	0	0	0	0	1	1	1	1	1	1	0	0	0	0	0	0	1
Thioredoxin domain	IPR013766_PF00085	Cluster_11	0	0	0	0	0	0	0	0	0	0	0	0	0	1	1	1	1	0	0	0	1	1	0	0	0	0	1
Lipoxygenase, C-terminal	IPR013819_PF00305	Cluster_1	0	0	0	0	0	0	0	0	0	0	0	0	1	0	0	1	2	2	1	2	0	0	0	0	0	0	1		Q7S0U2
Ribosomal protein L37, mitochondrial	IPR013870_PF08561	Cluster_1	0	0	0	0	0	0	0	0	0	0	0	0	1	1	1	1	1	1	1	1	1	1	0	0	0	0	1		Q7SCZ3
Mitochondrial import protein Pam17	IPR013875_PF08566	Cluster_1	0	0	0	0	0	0	0	0	0	0	0	0	1	1	1	1	1	1	1	1	1	1	0	0	0	0	1		Q7SEE1
Protein of unknown function DUF1772	IPR013901_PF08592	Cluster_1	0	0	0	0	0	0	0	0	0	0	0	0	0	0	1	1	1	2	1	1	1	1	0	0	0	0	1
DNA ligase D, 3'-phosphoesterase domain	IPR014144_PF13298	Cluster_1	0	0	0	0	0	0	1	0	0	1	1	1	0	0	1	1	1	1	0	1	0	1	0	0	0	0	1
Double-stranded RNA-binding domain	IPR014720_PF00035	Cluster_1	1	0	1	0	1	0	0	1	1	1	1	1	1	1	1	0	1	1	1	0	0	1	0	1	1	0	1	P36516	Q7SA88	A2QRC1
Ubiquitin-conjugating enzyme, C-terminal fungi	IPR015368_PF09288	Cluster_1	0	0	0	0	0	0	0	0	0	0	0	0	1	1	0	0	1	1	1	1	1	1	0	0	0	0	1		Q9P725
Transcription factor IIS, N-terminal	IPR017923_PF08711	Cluster_3	1	1	0	0	0	1	0	0	0	0	0	1	0	0	1	1	1	1	0	1	1	0	0	0	0	1	1
KilA, N-terminal/APSES-type HTH, DNA-binding	IPR018004_PF04383	Cluster_2	0	0	0	0	0	0	0	0	0	0	0	0	1	0	1	1	1	1	0	1	1	1	0	1	1	1	1		Q7SBG9
Translationally controlled tumour protein	IPR018105_PF00838	Cluster_1	0	0	0	0	0	0	0	0	0	0	0	0	0	0	1	1	1	1	0	1	1	1	0	0	0	0	1
LysM domain	IPR018392_PF01476	Cluster_3	0	0	0	0	0	0	1	0	1	2	0	0	1	0	0	1	2	1	1	3	0	0	0	0	0	0	1		Q7S9A2	A2RBJ4
Domain of unknown function DUF1993	IPR018531_PF09351	Cluster_1	0	0	0	0	0	0	0	0	0	0	0	0	0	0	1	1	1	1	1	1	0	1	0	0	0	0	1
Uncharacterised protein family UPF0646	IPR018822_PF10336	Cluster_1	0	0	0	0	1	0	0	0	0	0	0	0	0	0	1	1	1	0	1	1	1	0	0	0	0	0	1	P53060
Polycomb protein, VEFS-Box	IPR019135_PF09733	Cluster_1	0	0	0	0	0	0	0	0	0	0	0	0	0	1	1	0	1	1	1	1	1	1	0	0	0	0	1
THO complex, subunit 5	IPR019163_PF09766	Cluster_1	0	0	0	0	0	0	0	0	0	0	0	0	0	0	1	1	1	1	1	1	0	0	0	0	0	0	1
Ribosomal protein L27/L41, mitochondrial	IPR019189_PF09809	Cluster_1	0	0	0	0	0	0	0	0	0	0	0	0	0	0	1	1	1	1	1	1	0	0	0	0	0	0	1
Essential protein Yae1, N-terminal	IPR019191_PF09811	Cluster_2	0	0	0	0	0	1	1	1	1	1	1	1	1	1	1	1	1	1	1	1	1	0	0	0	0	0	1		Q871L1	A2QPX2
Protein of unknown function DUF2196	IPR019240_PF09962	Cluster_1	0	0	0	0	0	0	0	0	0	0	0	0	0	0	1	1	1	1	1	1	0	0	0	0	0	0	1
Histidine-specific methyltransferase, SAM-dependent	IPR019257_PF10017	Cluster_2	0	0	0	0	0	0	0	0	0	0	0	0	0	0	1	1	1	1	1	1	1	1	0	0	0	0	1
CBF1-interacting co-repressor CIR, N-terminal domain	IPR019339_PF10197	Cluster_2	0	0	0	0	0	0	0	0	0	0	0	0	0	0	0	1	1	1	1	0	1	1	0	0	0	0	1
Casein kinase substrate, phosphoprotein PP28	IPR019380_PF10252	Cluster_1	0	0	0	0	0	0	0	0	0	0	0	0	1	0	1	1	1	1	1	1	1	1	0	0	0	0	1		Q7S5I6
Uncharacterised protein family UPF0311	IPR020915_PF11578	Cluster_3	0	0	0	0	0	0	0	0	0	0	0	0	0	0	1	1	1	1	1	1	0	0	0	0	0	0	1
Chitin synthesis regulation, Congo red resistance, RCR protein	IPR020999_PF12273	Cluster_2	0	0	0	0	0	0	0	0	0	0	0	0	0	0	1	1	1	1	1	1	0	0	0	0	0	0	1
RNA ligase domain, REL/Rln2	IPR021122_PF09414	Cluster_1	0	0	0	0	0	0	0	0	0	0	0	0	2	1	0	0	1	1	1	1	0	0	0	0	0	0	1		Q7SG75,Q7S877
Protein of unknown function DUF2722	IPR021216_PF10846	Cluster_1	0	0	0	0	0	0	0	1	1	0	0	0	1	1	1	1	1	1	1	1	1	1	0	0	0	0	1		Q7RWC3	A2QDV1
Protein of unknown function DUF3328	IPR021765_PF11807	Cluster_2	0	0	0	0	0	0	0	1	0	1	0	2	0	1	2	2	1	0	1	1	1	1	0	0	0	0	1
Protein of unknown function DUF3468	IPR021858_PF11951	Cluster_25	0	0	0	0	0	0	0	1	1	0	1	0	0	0	1	1	1	1	1	2	1	0	0	0	0	0	1			A2R2P6
Protein of unknown function DUF3468	IPR021858_PF11951	Cluster_29	0	0	0	0	0	0	0	0	0	0	0	0	0	0	1	1	1	1	1	1	1	1	0	0	0	0	1
Protein of unknown function DUF3468	IPR021858_PF11951	Cluster_43	0	0	0	0	0	0	0	0	0	0	0	0	0	0	1	1	1	1	0	1	1	0	0	0	0	0	1
Protein of unknown function DUF3468	IPR021858_PF11951	Cluster_56	0	0	0	0	0	0	0	0	0	0	0	0	0	0	1	1	1	1	0	1	1	0	0	0	0	0	1
Putative amidoligase enzyme	IPR022025_PF12224	Cluster_1	0	0	0	0	0	0	0	0	0	0	0	0	0	0	1	1	1	1	1	2	0	0	0	0	0	0	1
Clathrin, heavy chain, propeller repeat	IPR022365_PF01394	Cluster_1	0	0	0	1	0	0	0	1	1	1	1	0	1	1	1	0	1	1	1	1	1	1	0	1	1	1	1		Q7SHV2	A2QI29
Zinc finger, double-stranded RNA binding	IPR022755_PF12171	Cluster_4	2	0	0	0	0	0	0	1	1	1	1	0	1	0	1	1	0	0	1	0	1	1	0	0	0	1	1		Q870N3	A5ABL9
Zinc finger, double-stranded RNA binding	IPR022755_PF12171	Cluster_7	0	0	0	0	0	0	0	0	1	1	1	1	0	0	1	1	1	1	0	1	1	0	0	0	0	1	1			A2QJC1
NADP-dependent oxidoreductase domain	IPR023210_PF00248	Cluster_8	0	0	0	0	0	0	0	1	1	1	1	1	1	1	1	1	1	1	1	1	1	1	0	0	0	0	1		Q7SHA0	A2R7U3
NADP-dependent oxidoreductase domain	IPR023210_PF00248	Cluster_14	0	0	0	0	0	0	0	0	0	0	0	0	0	0	2	2	1	1	1	1	0	0	0	0	0	0	1
NADP-dependent oxidoreductase domain	IPR023210_PF00248	Cluster_17	0	0	0	0	0	0	0	0	0	0	0	0	0	0	1	1	1	1	1	1	0	0	0	0	0	0	1
NADP-dependent oxidoreductase domain	IPR023210_PF00248	Cluster_18	0	0	0	0	0	0	0	0	0	0	0	0	0	0	0	1	1	1	0	1	1	1	0	0	0	0	1
NADP-dependent oxidoreductase domain	IPR023210_PF00248	Cluster_23	0	0	0	0	0	0	0	0	0	0	0	0	0	0	1	1	1	1	1	1	0	0	0	0	0	0	1
Pyridine nucleotide-disulphide oxidoreductase, FAD/NAD(P)-binding domain	IPR023753_PF07992	Cluster_16	0	0	0	0	0	0	0	2	1	2	2	0	0	1	1	1	2	2	1	1	1	1	0	0	0	0	1			A2QUK3
Pyridine nucleotide-disulphide oxidoreductase, FAD/NAD(P)-binding domain	IPR023753_PF07992	Cluster_36	0	0	0	0	0	0	0	0	1	0	0	0	0	0	1	1	1	1	1	1	0	0	0	0	0	0	1			A2R0R4
Tyrosine-protein phosphatase family, C-terminal domain	IPR025163_PF13348	Cluster_3	0	0	0	0	0	0	1	0	0	0	0	1	1	1	1	1	1	1	1	1	1	0	0	1	0	0	1		Q7SHB7
Phospholipase D-like domain	IPR025202_PF13091	Cluster_3	0	0	1	1	1	1	1	1	1	0	1	1	0	1	1	1	1	0	1	1	0	0	0	0	1	0	1	P25578		A2R9E9
UCH repeated domain	IPR025305_PF13446	Cluster_2	0	0	0	0	0	0	0	0	0	0	0	0	1	0	1	1	1	1	1	1	1	1	0	0	0	0	1		Q7S587
Domain of unknown function DUF4396	IPR025509_PF14342	Cluster_1	0	0	0	0	0	0	1	2	0	1	1	0	0	0	0	1	1	1	1	1	0	1	0	0	0	0	1
Leucine rich repeat 4	IPR025875_PF12799	Cluster_7	0	0	0	0	0	0	0	0	0	0	0	1	1	0	1	1	1	0	1	1	1	1	0	0	0	0	1		Q7SI36
Polysaccharide lyase	IPR025975_PF14099	Cluster_1	0	0	0	0	0	0	0	2	1	2	0	0	1	1	2	2	1	1	1	1	0	0	0	0	0	0	1		Q7S556	A2Q7N6
Non-haem dioxygenase N-terminal domain	IPR026992_PF14226	Cluster_5	0	0	0	0	0	0	0	0	0	0	1	0	1	1	1	1	1	1	0	0	1	1	0	0	0	0	1		Q7RZ55
C2 domain	IPR000008_PF00168	Cluster_2	4	2	2	2	3	1	1	1	1	1	1	1	1	1	1	1	1	1	1	1	1	1	1	1	1	1	1	Q12466,P48231,Q03640	Q7SEG5	A2QYD0	g5118.t1
C2 domain	IPR000008_PF00168	Cluster_3	3	1	1	1	1	1	1	1	1	1	1	1	1	1	1	1	1	1	2	2	1	1	1	2	1	0	1	P53901	Q7S1B8	A2QNE8	g268.t1
C2 domain	IPR000008_PF00168	Cluster_4	3	1	1	1	1	1	1	1	1	1	1	1	1	1	1	1	1	1	1	1	1	1	1	1	1	1	1	Q08748	Q7RUV0	A2QY73	g6759.t1
C2 domain	IPR000008_PF00168	Cluster_5	2	1	1	1	1	1	1	1	1	1	1	1	1	1	1	1	1	1	1	1	1	1	1	1	1	1	1	P53037	Q872A4	A2QU82	g1821.t1
C2 domain	IPR000008_PF00168	Cluster_6	2	1	1	1	1	1	1	0	1	1	1	1	1	1	1	1	0	0	1	1	1	1	1	1	1	1	1	P39940	Q7RV01	A2QQ28	g7385.t1
C2 domain	IPR000008_PF00168	Cluster_7	0	0	0	0	0	0	1	1	1	1	1	1	1	1	1	1	1	1	1	1	1	2	0	2	0	0	1		Q7S435	A2R174
C2 domain	IPR000008_PF00168	Cluster_8	0	1	0	1	2	1	0	0	0	0	0	0	0	0	1	1	1	1	1	1	1	1	1	1	1	1	1	P24583,P11792			g13186.t1
C2 domain	IPR000008_PF00168	Cluster_9	0	1	0	1	0	1	1	0	0	1	0	0	1	2	0	0	0	0	1	1	1	1	1	1	0	1	1		Q7S7C6		g6955.t1
Carboxyl transferase	IPR000022_PF01039	Cluster_1	4	0	0	0	0	1	2	1	2	3	3	2	1	1	1	1	1	3	1	3	1	1	1	1	2	1	1		Q7SE48	A2R563,A2QN36	g12721.t1
Carboxyl transferase	IPR000022_PF01039	Cluster_2	1	1	1	1	2	1	1	1	1	1	1	2	1	1	1	1	1	1	1	1	1	1	1	1	2	1	1	Q00955,P32874	Q7SBL5	A2QZ87	g4084.t1
Phosphofructokinase domain	IPR000023_PF00365	Cluster_1	2	2	2	2	2	1	1	2	0	1	1	1	1	1	1	1	1	1	1	1	1	1	1	1	1	1	1	P16861,P16862	Q7SI23		g4159.t1
Phosphoribosylaminoimidazole carboxylase PurE domain	IPR000031_PF00731	Cluster_1	0	1	1	1	1	1	1	1	1	1	1	1	1	1	1	1	1	1	1	1	1	1	1	1	1	1	1	P21264	Q7SGX5	A2Q9J5	g10839.t1
Cell division protein GTP binding	IPR000038_PF00735	Cluster_2	0	0	0	0	0	0	1	1	1	1	1	1	1	1	1	1	1	1	1	1	1	1	1	1	0	0	1		Q7SFN3	A2QF99	g9028.t1
Cell division protein GTP binding	IPR000038_PF00735	Cluster_3	0	0	0	0	0	1	1	0	0	1	1	1	1	1	1	1	1	1	1	1	0	0	1	0	0	0	1		Q7RWE4		g12526.t1
Adenosylhomocysteinase	IPR000043_PF05221	Cluster_1	2	1	1	1	1	1	1	1	1	1	1	1	1	1	1	1	1	1	1	1	1	1	1	1	1	1	1	P39954	Q7S9Y8	A2QQB9	g3833.t1
IQ motif, EF-hand binding site	IPR000048_PF00612	Cluster_1	7	1	1	1	1	1	1	1	1	1	1	1	1	1	1	1	1	1	1	1	1	1	1	1	1	1	1	P32492	Q7RW23	A2R9R1	g3273.t1
IQ motif, EF-hand binding site	IPR000048_PF00612	Cluster_2	0	0	0	0	1	1	1	1	1	1	0	1	1	1	1	1	1	1	1	1	1	1	1	1	1	1	1	Q12280	Q7SFX8	A2QP50	g5690.t1
Ribulose-phosphate 3-epimerase-like	IPR000056_PF00834	Cluster_1	0	0	0	0	0	0	1	1	1	1	1	1	1	1	1	1	1	1	1	1	1	1	1	0	0	0	1		Q7SCL8	A2QTW0	g16101.t1
Zinc finger, AN1-type	IPR000058_PF01428	Cluster_1	1	1	1	1	1	0	1	1	0	1	1	1	1	1	1	1	1	1	1	1	1	1	1	2	1	1	1	P53899	Q7S8M8		g3224.t1
Zinc finger, AN1-type	IPR000058_PF01428	Cluster_2	2	1	1	1	1	1	0	0	0	1	1	1	1	1	1	1	1	1	1	1	1	1	1	1	1	1	1	Q08422	Q8X0U6		g14053.t1
SWAP/Surp	IPR000061_PF01805	Cluster_1	1	1	1	1	1	1	1	1	1	1	1	1	1	1	1	1	1	1	1	1	1	1	1	1	1	1	1	P32524	Q7SH93	A5ABN9	g10757.t1
SWAP/Surp	IPR000061_PF01805	Cluster_2	0	0	0	0	0	0	1	1	1	1	1	1	1	1	1	1	1	1	1	1	1	1	1	0	0	0	1		Q7S637	A2R7Q8	g10407.t1
Pectinesterase, catalytic	IPR000070_PF01095	Cluster_1	0	0	0	0	0	0	0	3	2	1	1	1	1	1	0	1	0	0	1	2	2	2	1	1	0	0	1		Q7S087	A2QHB7,A2QK82	g4518.t1
Alpha/beta hydrolase fold-1	IPR000073_PF00561	Cluster_1	1	1	1	1	1	1	1	1	1	1	1	1	1	1	1	2	1	1	1	2	2	1	1	1	1	1	1	P08465	Q96UK3	A2R9A0	g5287.t1
Alpha/beta hydrolase fold-1	IPR000073_PF00561	Cluster_2	1	2	1	2	1	1	1	1	1	1	1	1	1	1	1	1	1	1	1	1	1	1	1	1	0	0	1	P34163	Q7SER8	A2QN29	g9070.t1
Alpha/beta hydrolase fold-1	IPR000073_PF00561	Cluster_4	1	1	1	1	0	1	1	1	1	1	1	0	1	1	1	2	1	1	1	1	1	1	1	1	1	2	1		Q7SDK8	A2QTP2	g10794.t1
NUDIX hydrolase domain	IPR000086_PF00293	Cluster_4	7	1	1	1	1	1	1	1	1	1	1	1	1	1	1	1	1	1	1	1	1	1	1	0	0	1	1	Q99321	Q8X052	A2QC00	g6480.t1
NUDIX hydrolase domain	IPR000086_PF00293	Cluster_5	2	1	2	1	1	1	1	2	1	1	1	1	1	1	1	1	1	1	1	1	1	0	1	1	1	1	1	P15496	Q7S8S0	A2QRX8	g6395.t1
NUDIX hydrolase domain	IPR000086_PF00293	Cluster_6	0	1	1	1	1	2	1	1	1	1	1	1	1	1	1	1	1	1	1	1	1	1	1	1	2	1	1	Q12524	Q7SDX5	A2QEP6	g2125.t1
NUDIX hydrolase domain	IPR000086_PF00293	Cluster_7	1	1	1	1	1	1	1	1	1	1	1	1	1	1	1	1	1	1	1	1	1	1	1	1	1	1	1	P53550	Q7SB05	A2R473	g11396.t1
NUDIX hydrolase domain	IPR000086_PF00293	Cluster_8	1	0	0	0	0	0	0	2	3	1	2	1	1	1	1	1	2	3	1	1	1	1	1	0	1	0	1		Q7SHK9	A2R0V2,A2QQK6,A2QWJ7	g15584.t1
NUDIX hydrolase domain	IPR000086_PF00293	Cluster_9	0	1	1	0	1	1	1	1	1	1	1	1	1	1	1	1	1	1	1	1	1	1	1	1	1	0	1	P53164	Q7RZS1	A2QUH6	g8936.t1
NUDIX hydrolase domain	IPR000086_PF00293	Cluster_10	0	0	0	0	0	0	1	1	0	0	1	1	1	1	1	1	2	2	1	2	2	0	1	1	0	0	1		Q7SE50		g526.t1
NUDIX hydrolase domain	IPR000086_PF00293	Cluster_11	0	0	0	0	0	0	1	0	1	1	1	1	0	1	1	1	1	1	1	1	1	0	1	1	0	0	1			A2QP45	g11780.t1
NUDIX hydrolase domain	IPR000086_PF00293	Cluster_12	0	0	0	0	0	0	0	1	1	1	1	0	0	1	1	1	1	1	0	1	1	1	1	0	0	0	1			A2QBR5	g8053.t1
NUDIX hydrolase domain	IPR000086_PF00293	Cluster_13	1	0	0	0	0	0	0	1	0	0	0	0	0	0	1	1	1	1	1	1	1	0	1	0	0	0	1				g10798.t1
Biotin/lipoyl attachment	IPR000089_PF00364	Cluster_2	2	1	1	1	1	1	1	2	1	1	1	1	1	1	1	1	1	1	2	1	2	1	1	1	1	0	1	P19262	Q7S3Y3	A2QY46	g9255.t1
Biotin/lipoyl attachment	IPR000089_PF00364	Cluster_3	2	1	1	1	1	1	1	1	1	1	1	1	1	1	1	1	1	1	1	1	1	1	1	1	1	2	1	P12695	P20285	A2QMI1	g11539.t1
Biotin/lipoyl attachment	IPR000089_PF00364	Cluster_4	1	1	1	1	2	1	1	1	1	1	1	1	1	1	1	1	1	1	1	1	1	1	1	1	1	1	1	Q00955,P32874	Q7SBL5	A2QZ87	g4084.t1
Biotin/lipoyl attachment	IPR000089_PF00364	Cluster_5	1	0	0	0	0	1	1	1	1	1	1	1	1	1	1	1	1	1	1	2	1	1	1	0	1	1	1		Q7SH25	A2QTN3	g3742.t1
Biotin/lipoyl attachment	IPR000089_PF00364	Cluster_6	0	0	0	0	0	0	0	0	0	0	0	1	1	1	1	1	1	1	1	1	1	1	1	0	0	0	1		Q7RWS2		g14474.t1
Polyprenyl synthetase	IPR000092_PF00348	Cluster_2	1	1	1	1	1	1	1	1	2	1	1	1	1	1	1	1	2	2	1	1	1	1	1	2	1	2	1	P08524	Q92250	A2R6Y8,A5AAE1	g6358.t1
Polyprenyl synthetase	IPR000092_PF00348	Cluster_3	2	1	1	1	1	1	1	1	1	1	1	1	1	1	1	1	1	1	1	1	1	1	1	1	1	1	1	P18900	Q7S565	A5ABT5	g14016.t1
Glycoside hydrolase, clan GH-D	IPR000111_PF02065	Cluster_2	1	0	0	0	0	0	0	1	2	2	1	1	0	0	1	1	1	1	2	1	1	0	1	0	0	0	1			A2QSZ9,A2QSZ8	g7595.t1
Amidase	IPR000120_PF01425	Cluster_1	0	0	0	0	0	1	1	1	1	1	1	1	1	0	0	0	1	1	0	1	1	1	1	1	0	0	1		Q7SGQ9	A2QYF2	g2738.t1
Amidase	IPR000120_PF01425	Cluster_3	0	0	0	0	0	0	1	0	1	0	1	1	0	2	2	3	1	1	0	0	2	0	0	0	0	0	1			A2R3H3
Amidase	IPR000120_PF01425	Cluster_6	0	0	0	0	0	0	0	0	1	1	1	1	0	1	0	0	1	2	0	2	1	1	0	0	0	0	1			A2QKY4
Amidase	IPR000120_PF01425	Cluster_8	0	0	0	0	0	0	0	0	0	1	0	1	0	1	1	1	0	0	2	2	1	1	0	0	0	0	1
Amidase	IPR000120_PF01425	Cluster_9	0	1	0	0	0	0	1	1	0	1	0	1	0	0	1	1	1	1	1	0	1	0	0	0	0	0	1
Amidase	IPR000120_PF01425	Cluster_10	0	0	0	0	0	0	0	0	0	0	0	0	1	1	1	1	1	1	1	1	1	1	1	0	0	0	1		Q7SHZ2		g10809.t1
Amidase	IPR000120_PF01425	Cluster_11	0	0	0	0	0	0	0	0	0	0	0	0	1	1	1	1	1	1	1	1	1	1	1	0	0	0	1		Q7SCV1		g10253.t1
Amidase	IPR000120_PF01425	Cluster_14	0	0	0	0	0	0	0	0	0	0	0	1	0	0	0	1	1	1	1	2	1	1	0	0	0	0	1
Ubiquitin-activating enzyme repeat	IPR000127_PF02134	Cluster_1	1	1	1	1	1	1	1	1	1	1	1	1	1	1	1	1	1	1	1	1	1	1	1	1	1	3	1	Q99344	Q7SHT1	A2QD12	g558.t1
Ubiquitin-activating enzyme repeat	IPR000127_PF02134	Cluster_2	1	1	1	1	1	1	1	1	1	1	1	1	1	1	1	1	1	1	1	1	1	1	1	1	1	1	1	P22515	Q7RWR0	A2R5Y8	g7807.t1
Ubiquitin-activating enzyme repeat	IPR000127_PF02134	Cluster_3	1	1	1	1	1	1	1	1	1	1	1	1	1	1	1	1	1	1	1	1	1	1	1	1	1	1	1	P52488	Q9P3F0	A2QVB1	g2931.t1
ATPase, F1 complex, gamma subunit	IPR000131_PF00231	Cluster_1	0	0	0	0	0	0	1	1	1	1	1	1	1	1	1	1	1	1	1	1	1	1	1	0	0	0	1		Q7S2M9	A2Q8K1	g5100.t1
ER lumen protein retaining receptor	IPR000133_PF00810	Cluster_1	0	0	0	0	0	0	0	1	0	1	0	0	1	1	1	1	1	1	1	1	1	1	1	0	0	0	1		Q8X083		g1006.t1
ER lumen protein retaining receptor	IPR000133_PF00810	Cluster_2	0	0	0	0	0	0	0	0	0	0	0	1	0	1	1	1	1	1	1	1	1	1	1	0	0	0	1				g2713.t1
Fructose-1,6-bisphosphatase class 1/Sedoheputulose-1,7-bisphosphatase	IPR000146_PF00316	Cluster_1	2	1	1	1	1	1	1	1	1	1	1	1	1	1	1	1	1	1	1	1	1	1	1	1	1	1	1	P09201	Q7S6N8	A2QIZ8	g13112.t1
Fructose-1,6-bisphosphatase class 1/Sedoheputulose-1,7-bisphosphatase	IPR000146_PF00316	Cluster_2	0	0	0	0	0	0	0	0	0	0	0	0	1	0	1	1	1	1	1	1	1	1	0	0	0	0	1		Q7RYC4
Ran binding domain	IPR000156_PF00638	Cluster_1	1	1	1	1	1	1	1	1	1	1	1	1	1	1	1	1	1	1	1	1	1	1	1	1	1	1	1	P41920	Q7RXR6	A2RA71	g13225.t1
Ran binding domain	IPR000156_PF00638	Cluster_2	0	0	0	0	0	0	0	0	0	0	0	0	1	1	1	1	1	1	1	0	1	0	1	0	0	0	1		Q8X0V2		g13634.t1
Ran binding domain	IPR000156_PF00638	Cluster_3	0	0	0	0	0	0	0	0	0	0	0	1	1	1	0	1	0	0	1	1	1	0	1	0	0	0	1		Q7S8L8		g9928.t1
Ras-association	IPR000159_PF00788	Cluster_1	1	1	1	1	1	1	1	1	1	1	1	0	1	1	1	1	1	1	1	1	1	1	1	1	1	0	1	P25344	Q7RXY9	A2QK36	g10729.t1
Ras-association	IPR000159_PF00788	Cluster_2	1	1	1	0	1	1	1	1	0	1	1	1	1	1	1	1	1	1	1	1	1	0	1	0	1	1	1	P08678	Q01631		g11576.t1
Glucose-methanol-choline oxidoreductase, N-terminal	IPR000172_PF00732	Cluster_3	2	2	1	0	0	0	1	1	1	1	1	1	1	1	1	1	1	1	1	2	1	1	2	0	1	1	1		Q7S2Z2	A2Q9Z3	g10084.t1,g11092.t1
Glucose-methanol-choline oxidoreductase, N-terminal	IPR000172_PF00732	Cluster_4	0	0	0	0	0	0	0	0	1	0	1	0	1	1	2	1	0	1	0	0	1	1	1	0	0	0	1		Q8X0N8	A2QB13	g6138.t1
GNAT domain	IPR000182_PF00583	Cluster_2	2	1	1	1	1	1	1	1	1	1	1	1	1	1	1	1	1	1	1	1	1	1	1	1	1	2	1	Q02908	Q9P729	A2R9J6	g14552.t1
GNAT domain	IPR000182_PF00583	Cluster_3	0	0	0	0	0	0	0	0	0	0	0	1	1	1	1	1	1	1	1	1	1	1	1	0	0	0	1		Q871J7		g4636.t1
GNAT domain	IPR000182_PF00583	Cluster_4	0	0	0	0	0	0	0	0	0	0	0	0	1	1	1	1	0	0	1	1	1	1	1	0	0	0	1		Q7S7B6		g7564.t1
Bacterial surface antigen (D15)	IPR000184_PF01103	Cluster_1	3	1	1	1	1	2	1	1	1	1	1	1	1	1	1	1	1	1	1	1	1	1	1	1	1	0	1	P53969	Q7S6X0	A2R2C1	g12001.t1
Aminotransferase, class V/Cysteine desulfurase	IPR000192_PF00266	Cluster_5	1	2	1	1	0	2	1	2	2	1	1	1	1	1	2	2	1	1	1	2	1	2	1	2	1	0	1		Q7SBF8	A2QC24,A2QL14	g6715.t1
Aminotransferase, class V/Cysteine desulfurase	IPR000192_PF00266	Cluster_6	2	1	1	1	1	1	1	1	1	1	1	1	1	1	1	1	1	1	1	1	1	1	1	1	1	3	1	P25374	Q8NIK7	A2QU41	g13529.t1
Aminotransferase, class V/Cysteine desulfurase	IPR000192_PF00266	Cluster_7	1	1	1	1	1	1	1	1	1	1	1	1	1	1	1	1	2	1	1	1	1	1	1	1	1	1	1	P33330	Q7RWH9	A2QBQ7	g7585.t1
Aminotransferase, class V/Cysteine desulfurase	IPR000192_PF00266	Cluster_8	1	1	2	1	1	1	1	1	1	1	1	1	1	1	1	1	1	1	1	1	1	1	1	1	1	1	1	P43567	Q7RWC1	A2QQ22	g4374.t1
Aminotransferase, class V/Cysteine desulfurase	IPR000192_PF00266	Cluster_10	0	0	0	0	0	0	0	3	1	0	1	1	0	1	1	1	2	2	4	1	1	0	1	1	1	0	1			A2R0K7	g16102.t1
ATPase, F1/V1/A1 complex, alpha/beta subunit, nucleotide-binding domain	IPR000194_PF00006	Cluster_1	3	1	1	1	1	1	1	1	1	2	1	2	1	1	1	1	1	1	1	1	1	1	1	1	1	2	1	P07251	P37211	A2R8J9	g576.t1
ATPase, F1/V1/A1 complex, alpha/beta subunit, nucleotide-binding domain	IPR000194_PF00006	Cluster_2	4	1	1	1	1	1	1	1	1	1	1	1	1	1	1	1	1	2	1	1	1	1	1	1	1	1	1	P00830	P23704	A2R3G2	g1537.t1
ATPase, F1/V1/A1 complex, alpha/beta subunit, nucleotide-binding domain	IPR000194_PF00006	Cluster_3	2	1	1	1	1	1	1	1	1	1	1	1	1	1	1	1	1	2	1	1	1	1	1	1	1	1	1	P16140	P11593	A2QC23	g1085.t1
ATPase, F1/V1/A1 complex, alpha/beta subunit, nucleotide-binding domain	IPR000194_PF00006	Cluster_4	2	1	1	1	1	1	1	1	1	1	1	1	1	1	1	1	1	1	1	1	1	1	1	1	1	1	1	P17255	P11592	A5AAF1	g8756.t1
Rab-GTPase-TBC domain	IPR000195_PF00566	Cluster_2	3	1	1	1	1	1	1	1	1	1	1	1	1	1	1	1	1	1	1	1	1	1	1	1	1	1	1	P48365	Q7S7B2	A2R4T8	g14532.t1
Rab-GTPase-TBC domain	IPR000195_PF00566	Cluster_3	3	1	1	1	1	1	1	1	1	1	1	1	1	1	1	1	1	1	1	1	1	1	1	1	1	1	1	P53258	Q7SHX2	A2R569	g9057.t1
Rab-GTPase-TBC domain	IPR000195_PF00566	Cluster_4	1	1	1	1	1	1	1	1	1	1	1	1	1	1	1	1	1	1	1	1	1	1	1	1	1	2	1	Q08484	Q7S7T4	A2QFI5	g14900.t1
Rab-GTPase-TBC domain	IPR000195_PF00566	Cluster_5	0	1	1	1	1	1	1	1	1	1	1	1	1	1	1	1	1	1	1	1	1	1	1	1	1	1	1	P26448	Q7SGT3	A2Q8P6	g1677.t1
Rab-GTPase-TBC domain	IPR000195_PF00566	Cluster_6	2	1	1	1	2	1	1	1	1	1	0	1	1	1	1	1	1	1	1	1	1	1	1	0	0	0	1	P48566,Q12317	Q7RY49	A2QE01	g10051.t1
Rab-GTPase-TBC domain	IPR000195_PF00566	Cluster_7	0	0	0	0	0	1	1	1	1	1	1	1	1	1	1	1	1	1	1	1	1	1	1	1	1	2	1		Q873F9	A2QRX2	g1067.t1
Rab-GTPase-TBC domain	IPR000195_PF00566	Cluster_8	0	0	0	0	0	0	1	1	1	1	1	1	1	1	1	1	1	1	1	1	1	1	1	0	0	0	1		Q7S461	A2R1G5	g3142.t1
Rab-GTPase-TBC domain	IPR000195_PF00566	Cluster_9	0	0	0	0	0	0	1	1	1	1	1	1	0	1	1	1	1	1	1	1	1	1	1	0	0	0	1			A2QDV2	g2358.t1
Rab-GTPase-TBC domain	IPR000195_PF00566	Cluster_10	0	0	0	0	0	0	1	1	1	1	1	1	1	0	1	1	1	1	1	1	1	1	1	0	0	0	1		Q7SB56	A2QNV9	g15356.t1
Rab-GTPase-TBC domain	IPR000195_PF00566	Cluster_11	0	0	0	0	0	0	1	1	1	1	1	0	1	1	1	1	1	1	1	1	1	1	1	0	0	0	1		Q7S8L1	A2Q829	g9918.t1
Ribosomal protein L19/L19e domain	IPR000196_PF01280	Cluster_1	3	1	1	1	1	1	1	1	1	1	0	1	1	1	1	1	1	1	1	1	1	1	1	1	1	1	1	P05735	Q7S5N9	A2QKK6	g4696.t1
Rho GTPase-activating protein domain	IPR000198_PF00620	Cluster_1	3	1	1	1	1	1	1	1	1	1	1	1	1	1	1	1	1	1	1	1	1	1	1	1	1	2	1	P35688	Q7SH40	A2R584	g5633.t1
Rho GTPase-activating protein domain	IPR000198_PF00620	Cluster_2	1	1	1	1	1	1	1	1	1	1	1	1	1	1	1	1	1	1	1	1	1	1	1	1	1	1	1	P38339	Q7SF96	A5ABQ5	g4863.t1
Rho GTPase-activating protein domain	IPR000198_PF00620	Cluster_3	3	1	1	1	1	2	1	1	1	1	1	1	1	1	1	1	1	1	1	1	1	1	1	0	0	0	1	P43556	Q7S2C4	A2R1D7	g11206.t1
Rho GTPase-activating protein domain	IPR000198_PF00620	Cluster_4	1	1	1	0	1	1	1	1	1	1	1	1	1	1	1	1	1	1	1	1	1	1	1	1	1	1	1	P32873	Q7SHT9	A2RBH4	g14720.t1
Rho GTPase-activating protein domain	IPR000198_PF00620	Cluster_5	1	1	1	2	1	1	1	1	1	1	1	1	1	1	1	1	1	1	1	1	1	1	1	0	1	0	1	P17121	Q7RX91	A2QV01	g7948.t1
Rho GTPase-activating protein domain	IPR000198_PF00620	Cluster_6	0	0	0	0	0	0	1	1	1	1	1	1	1	1	1	1	1	1	1	1	1	1	1	0	0	0	1		Q7S9L4	A2QRB5	g7685.t1
Rho GTPase-activating protein domain	IPR000198_PF00620	Cluster_7	0	0	0	0	0	0	1	1	1	1	1	1	0	1	1	1	1	1	1	1	1	1	1	0	0	0	1			A2R1F2	g2632.t1
Rho GTPase-activating protein domain	IPR000198_PF00620	Cluster_8	0	0	0	0	0	0	0	0	0	0	0	0	1	1	1	1	1	0	1	1	1	0	1	0	0	0	1		Q7RXV9		g11448.t1
Peptidase S8/S53 domain	IPR000209_PF00082	Cluster_6	3	1	1	1	1	1	1	1	1	1	1	1	1	1	1	1	1	1	1	1	1	1	1	1	1	1	1	P13134	Q7SGV0	A2Q9N6	g2706.t1
Ribosomal protein L14b/L23e	IPR000218_PF00238	Cluster_1	4	1	1	1	1	1	1	1	1	1	1	1	1	1	1	1	1	1	1	1	1	1	1	1	1	1	1	P04451	Q7SHJ9	A5AAY5	g13290.t1
Ribosomal protein L14b/L23e	IPR000218_PF00238	Cluster_2	1	1	1	1	1	1	1	1	1	1	1	1	1	1	1	1	1	1	1	1	1	1	1	1	1	1	1	P35996	Q7SBJ8	A2QZ74	g8872.t1
Dbl homology (DH) domain	IPR000219_PF00621	Cluster_1	11	1	1	1	2	1	1	1	1	1	1	1	1	1	1	1	1	1	1	1	1	1	1	4	3	5	1	P53046,P51862	Q7SHY5	A2QNB9	g9743.t1
Dbl homology (DH) domain	IPR000219_PF00621	Cluster_2	5	1	1	1	1	1	1	1	1	1	1	1	1	1	1	1	1	2	1	2	1	1	1	0	1	1	1	P11433	Q7S4Y3	A2QIY3	g10771.t1
Dbl homology (DH) domain	IPR000219_PF00621	Cluster_3	2	0	0	0	0	1	0	1	1	1	3	1	0	1	1	1	1	1	1	1	1	1	1	1	1	1	1			A2R1G8	g4755.t1
Dbl homology (DH) domain	IPR000219_PF00621	Cluster_4	0	0	0	1	1	1	1	1	1	1	1	2	1	1	1	1	1	1	1	1	1	1	1	0	0	0	1	Q06412	Q7SE44	A2R570	g9060.t1
Dbl homology (DH) domain	IPR000219_PF00621	Cluster_5	0	0	0	0	0	0	1	1	1	1	1	1	1	1	1	1	1	1	1	1	1	1	1	0	0	0	1		Q7S8N5	A2RAA8	g3231.t1
Dbl homology (DH) domain	IPR000219_PF00621	Cluster_6	0	0	0	0	0	0	1	0	1	0	1	1	1	1	1	1	0	0	1	1	1	1	1	0	0	0	1		Q7SE30	A2QSA9	g490.t1
Armadillo	IPR000225_PF00514	Cluster_1	4	1	1	1	1	1	1	1	1	1	1	1	1	1	0	1	1	1	1	1	1	1	1	1	1	1	1	Q02821	Q9C2K9	A2R629	g3333.t1
Armadillo	IPR000225_PF00514	Cluster_2	2	1	1	1	1	1	1	1	1	0	1	1	1	1	1	1	1	1	1	1	1	1	1	1	0	1	1	P39968	Q7RXW1	A2R3P5	g14614.t1
Heat shock factor (HSF)-type, DNA-binding	IPR000232_PF00447	Cluster_1	6	1	1	1	1	1	1	1	1	1	1	1	1	1	1	1	1	2	1	1	1	1	1	1	1	1	1	P10961	Q7SBY0	A2R6Z7	g2295.t1
Heat shock factor (HSF)-type, DNA-binding	IPR000232_PF00447	Cluster_2	0	2	2	2	1	1	1	1	1	1	1	1	1	1	1	1	0	1	1	1	1	1	1	0	0	0	1	P20134	Q7RV23	A2R2D2	g4432.t1
Heat shock factor (HSF)-type, DNA-binding	IPR000232_PF00447	Cluster_3	3	1	1	1	1	1	1	1	1	1	1	1	0	1	1	1	0	0	1	1	1	1	1	0	0	0	1	P38889		A2QLL7	g13695.t1
GRIP	IPR000237_PF01465	Cluster_1	0	0	1	1	1	1	1	1	1	1	1	1	1	1	1	1	1	1	1	1	1	1	1	0	0	0	1	Q06704	Q7SHC8	A2R349	g15838.t1
Putative RNA methylase domain	IPR000241_PF01170	Cluster_1	1	1	1	1	1	1	0	1	1	1	0	0	0	1	1	1	1	1	1	1	1	1	1	0	0	0	1	Q12463		A2Q9C5	g3823.t1
Protein-tyrosine phosphatase, receptor/non-receptor type	IPR000242_PF00102	Cluster_1	6	2	1	3	3	1	1	1	1	1	1	1	1	1	1	1	1	0	1	1	1	1	1	2	2	2	1	P25044,P29461,P40048	Q9P664	A2R2B2	g1035.t1
Protein-tyrosine phosphatase, receptor/non-receptor type	IPR000242_PF00102	Cluster_2	0	0	1	0	0	1	1	1	2	1	1	1	1	1	1	2	1	1	1	1	1	1	1	0	0	0	1		Q7S5A7	A2QDC9,A2Q7J2	g1945.t1
Peptidase T2, asparaginase 2	IPR000246_PF01112	Cluster_1	0	0	0	0	0	0	1	1	0	1	1	1	1	1	1	1	1	1	1	1	1	1	1	1	1	0	1		Q7S5Y2		g9965.t1
Peptidase T2, asparaginase 2	IPR000246_PF01112	Cluster_2	0	0	0	0	0	0	1	1	1	1	1	1	1	1	1	1	1	1	1	1	1	1	1	0	0	0	1		Q9P6D1	A2RAH7	g4449.t1
Peptidase T2, asparaginase 2	IPR000246_PF01112	Cluster_3	0	0	0	0	0	0	0	0	0	0	0	0	1	1	1	1	1	1	1	1	1	2	1	0	0	0	1		Q7S2Q8		g5463.t1
Forkhead-associated (FHA) domain	IPR000253_PF00498	Cluster_2	8	1	1	1	2	1	0	1	1	1	1	1	1	1	1	1	1	1	1	1	1	1	1	1	1	0	1	P38823,P53924	Q7SB71	A2R3P8	g9888.t1
Forkhead-associated (FHA) domain	IPR000253_PF00498	Cluster_3	1	1	1	1	2	1	1	1	0	1	1	1	1	1	1	1	1	1	1	1	1	1	1	2	1	1	1	Q06001,Q03944	Q7SDL6		g2439.t1
Forkhead-associated (FHA) domain	IPR000253_PF00498	Cluster_4	0	1	1	1	2	1	1	1	1	1	1	1	1	0	1	1	1	1	1	1	1	1	1	1	0	0	1	P40466,P41813	Q7RY86	A2QDQ2	g10950.t1
Forkhead-associated (FHA) domain	IPR000253_PF00498	Cluster_5	0	0	0	0	0	1	1	1	1	1	1	1	1	1	1	1	1	1	1	1	1	1	1	1	0	0	1		Q7S3H0	A2R366	g9661.t1
Forkhead-associated (FHA) domain	IPR000253_PF00498	Cluster_6	0	0	0	0	0	0	0	1	0	0	0	0	0	1	1	1	1	1	1	1	1	1	1	0	0	0	1				g5730.t1
Cellulose-binding domain, fungal	IPR000254_PF00734	Cluster_5	0	0	0	0	0	0	0	0	1	1	1	0	1	0	3	2	0	0	1	2	0	3	1	6	0	0	1		Q7SA23	A2QAI7	g838.t1
Cellulose-binding domain, fungal	IPR000254_PF00734	Cluster_6	0	0	0	0	0	0	0	0	1	1	0	1	1	1	1	1	0	0	1	1	1	2	0	1	0	0	1		Q872J7	A2QYR9
Uroporphyrinogen decarboxylase (URO-D)	IPR000257_PF01208	Cluster_1	1	1	1	1	1	1	1	1	1	1	1	1	1	1	1	1	1	1	1	1	1	1	1	1	1	0	1	P32347	Q7SE23	A2Q8G4	g7030.t1
Ribosomal protein S17	IPR000266_PF00366	Cluster_1	2	1	0	1	1	1	1	0	1	1	1	1	1	1	1	1	1	1	1	1	1	1	1	1	0	1	1	P26781	Q7SFZ2	A2QPB3	g2717.t1
Phox/Bem1p	IPR000270_PF00564	Cluster_1	4	1	1	1	1	1	1	1	1	1	1	1	1	1	1	1	1	1	1	1	1	1	1	0	1	1	1	P11433	Q7S4Y3	A2QIY3	g10771.t1
Phox/Bem1p	IPR000270_PF00564	Cluster_2	3	1	1	1	0	1	1	1	1	1	1	1	0	1	1	1	1	1	1	1	1	1	1	1	1	1	1			A2RB81	g14805.t1
Phox/Bem1p	IPR000270_PF00564	Cluster_3	2	0	0	0	0	0	1	1	1	1	1	1	1	1	1	1	1	1	1	1	1	1	1	1	0	0	1		Q7SBV8	A2R821	g9434.t1
Phox/Bem1p	IPR000270_PF00564	Cluster_4	0	0	0	0	1	1	1	1	1	1	1	1	1	1	1	1	1	1	1	1	1	1	1	1	0	0	1	P29366	Q7S9S2	A2R2H0	g3213.t1
Cys/Met metabolism, pyridoxal phosphate-dependent enzyme	IPR000277_PF01053	Cluster_3	0	1	1	2	1	1	2	4	2	2	2	1	1	1	2	2	1	1	1	3	1	1	1	2	0	1	1	P38716	Q7SCL5	A2QIU2,A2QYG1	g5639.t1
Cys/Met metabolism, pyridoxal phosphate-dependent enzyme	IPR000277_PF01053	Cluster_4	1	1	1	1	1	1	1	1	1	1	1	1	1	1	1	1	1	1	1	1	1	1	1	1	1	1	1	P53101	Q96VU8	A2R2J2	g12064.t1
Ribosomal protein S28e	IPR000289_PF01200	Cluster_1	3	2	1	2	2	1	1	0	1	1	1	1	1	1	1	1	1	1	1	1	1	2	1	1	1	1	1	Q3E7X9,P0C0X0	Q7S6W5	A2R1F7	g11572.t1
Peptidyl-prolyl cis-trans isomerase, PpiC-type	IPR000297_PF00639	Cluster_1	0	0	0	0	0	1	0	1	1	1	1	1	1	1	1	1	1	1	1	1	1	1	1	0	0	0	1		O60045	A2QZ76	g8875.t1
GIY-YIG nuclease superfamily	IPR000305_PF01541	Cluster_1	0	1	1	1	1	1	1	1	1	1	1	1	1	0	1	1	0	1	0	1	1	1	1	0	1	1	1	P38324	Q9P737	A2QUJ2	g5954.t1
FYVE zinc finger	IPR000306_PF01363	Cluster_1	2	1	1	1	1	1	1	0	1	1	1	1	1	1	1	1	1	1	1	1	1	1	1	1	1	1	1	P40343	Q7RZJ2	A2QWA2	g8389.t1
FYVE zinc finger	IPR000306_PF01363	Cluster_2	0	1	1	1	1	1	1	1	1	1	1	1	1	1	1	1	1	0	1	1	1	1	1	0	1	1	1	P32609	Q7SBH2	A2QE55	g5386.t1
FYVE zinc finger	IPR000306_PF01363	Cluster_3	1	1	1	1	1	0	1	1	1	0	1	1	1	0	1	1	1	1	1	1	1	1	1	0	1	1	1	P34756	Q7SEY1	A2QPC6	g8106.t1
FYVE zinc finger	IPR000306_PF01363	Cluster_4	0	1	1	1	1	1	1	0	1	1	1	0	1	1	1	1	1	1	1	1	1	1	1	0	0	0	1	P53191	Q7S2Z5	A2Q9Z6	g11097.t1
FYVE zinc finger	IPR000306_PF01363	Cluster_5	0	0	0	0	0	0	1	0	1	0	1	0	1	1	1	1	1	1	1	1	0	0	1	0	0	0	1		Q7SGQ5	A2QYF7	g5115.t1
Ribosomal protein S16	IPR000307_PF00886	Cluster_1	2	1	1	1	1	1	1	1	1	1	1	1	1	1	1	1	1	1	1	1	1	1	1	0	0	0	1	Q02608	P08580	A2QGV4	g2453.t1
Glycosyl transferase, family 3	IPR000312_PF00591	Cluster_1	0	0	0	0	0	0	1	1	1	1	1	1	1	1	1	1	1	1	1	1	1	1	1	0	0	0	1		Q7RZ63	A2Q9B1	g5124.t1
PWWP domain	IPR000313_PF00855	Cluster_1	0	2	2	2	2	1	1	1	1	1	1	1	1	1	1	1	1	1	1	1	1	1	1	0	1	1	1	Q04213,Q06188	Q7SH45	A2R8U7	g2181.t1
Glycoside hydrolase, family 31	IPR000322_PF01055	Cluster_2	0	0	0	0	0	0	0	3	2	2	3	1	0	1	0	1	0	0	1	2	1	3	1	0	0	0	1			A2QTU5,A2Q8M5	g6857.t1
Glycoside hydrolase, family 31	IPR000322_PF01055	Cluster_3	1	0	0	0	0	0	0	1	1	1	1	1	0	1	1	1	1	1	1	1	1	2	1	0	1	0	1			A2RB60	g1116.t1
Glycoside hydrolase, family 31	IPR000322_PF01055	Cluster_4	0	1	0	0	0	0	0	1	0	1	1	1	0	1	1	1	0	0	1	1	1	1	1	1	0	0	1				g15290.t1
Phosphatidic acid phosphatase type 2/haloperoxidase	IPR000326_PF01569	Cluster_1	1	3	3	3	1	1	0	1	1	1	1	0	1	1	1	1	1	0	1	1	1	1	1	0	1	1	1	Q05521	Q7S2D7	A2QWI8	g8050.t1
Phosphatidic acid phosphatase type 2/haloperoxidase	IPR000326_PF01569	Cluster_2	2	1	1	1	1	1	1	1	1	1	1	1	1	0	1	1	1	1	1	1	1	1	1	0	1	1	1	P36107	Q7S586	A2R7I5	g15390.t1
Phosphatidic acid phosphatase type 2/haloperoxidase	IPR000326_PF01569	Cluster_3	1	1	1	1	2	1	1	1	1	1	0	1	1	1	1	1	1	1	1	1	1	1	1	1	1	1	1	P47013,P23501	Q8X0H9	A2R3U4	g2928.t1
Phosphatidic acid phosphatase type 2/haloperoxidase	IPR000326_PF01569	Cluster_4	0	0	0	0	0	0	0	2	2	1	1	1	1	1	0	1	1	2	1	2	1	1	1	0	0	0	1		Q7SCX9	A2QQ74,A2QBT7	g6646.t1
Phosphatidic acid phosphatase type 2/haloperoxidase	IPR000326_PF01569	Cluster_5	0	0	0	0	0	0	0	0	0	0	0	2	1	3	1	1	1	1	2	2	3	1	1	0	0	0	1		Q872K8		g7839.t1
Phosphatidic acid phosphatase type 2/haloperoxidase	IPR000326_PF01569	Cluster_6	0	0	0	0	0	1	1	0	1	1	1	1	1	1	1	1	1	1	1	1	1	1	1	0	0	0	1		Q9C2M6	A2R4S8	g6156.t1
SNF2-related	IPR000330_PF00176	Cluster_2	1	2	2	2	2	2	2	2	2	2	2	2	1	1	1	1	1	1	1	1	1	1	1	1	2	2	1	P32863,P38086	Q7RVS3	A2QAZ0,A2QSF7	g9707.t1
SNF2-related	IPR000330_PF00176	Cluster_5	1	1	1	1	1	1	1	1	1	1	1	1	1	1	1	1	1	1	1	1	1	1	1	1	1	2	1	P31244	Q9HE48	A2R176	g9520.t1
SNF2-related	IPR000330_PF00176	Cluster_6	1	1	1	1	1	1	1	1	1	1	1	1	1	1	1	1	1	1	1	1	1	1	1	1	1	1	1	P31380	Q7S159	A2QES1	g5072.t1
SNF2-related	IPR000330_PF00176	Cluster_7	1	1	1	1	1	1	1	1	1	1	1	1	1	1	1	1	1	1	1	1	1	1	1	1	1	1	1	P53115	Q872I5	A2R9H9	g7967.t1
SNF2-related	IPR000330_PF00176	Cluster_8	1	1	1	1	1	1	1	1	1	1	1	1	1	1	1	1	1	1	1	1	1	1	1	1	1	1	1	P32333	Q7S1Z7	A2RAN4	g10113.t1
SNF2-related	IPR000330_PF00176	Cluster_9	1	1	1	1	1	1	1	1	1	1	1	1	1	1	1	1	1	1	1	1	1	1	1	1	1	0	1	Q05471	Q7S133	A2QY71	g15299.t1
SNF2-related	IPR000330_PF00176	Cluster_11	2	1	1	1	1	0	1	2	1	1	1	1	1	1	1	1	1	2	1	1	1	1	0	0	0	0	1	Q08562	Q7SI21	A2QSB2
SNF2-related	IPR000330_PF00176	Cluster_12	1	1	1	1	0	1	1	1	1	1	1	1	1	0	1	1	1	1	1	1	1	1	1	1	1	1	1		Q7SAC4	A2QRG3	g9866.t1
SNF2-related	IPR000330_PF00176	Cluster_13	1	1	1	1	1	1	1	1	1	1	1	1	1	1	1	1	1	0	1	1	1	1	1	0	1	1	1	P32849	Q7S1P9	A2QTI7	g10659.t1
SNF2-related	IPR000330_PF00176	Cluster_14	1	1	1	1	1	1	1	1	1	1	1	1	1	1	1	1	1	1	1	1	1	1	1	0	0	0	1	P40352	Q7SBC8	A2R2K5	g15471.t1
SNF2-related	IPR000330_PF00176	Cluster_15	1	0	0	1	0	1	1	1	1	1	1	1	1	1	1	1	1	1	1	1	1	1	1	0	1	1	1		Q7S6P9	A2QWZ3	g1417.t1
SNF2-related	IPR000330_PF00176	Cluster_16	0	1	1	1	0	1	1	1	1	1	1	1	1	1	1	1	1	1	1	1	1	1	1	0	0	0	1		Q7S0Q1	A2QJ50	g14223.t1
SNF2-related	IPR000330_PF00176	Cluster_17	0	1	0	1	1	0	1	1	1	1	1	1	1	1	1	1	1	1	1	1	1	1	1	0	1	0	1	Q06554	Q9HE51	A2RBF2	g15098.t1
SNF2-related	IPR000330_PF00176	Cluster_18	0	0	0	0	0	0	1	1	1	1	1	1	1	1	1	1	1	1	1	1	1	1	1	0	1	0	1		Q7S7H0	A2QP62	g192.t1
SNF2-related	IPR000330_PF00176	Cluster_19	0	0	0	0	0	0	0	1	1	1	1	1	1	1	1	1	1	1	1	1	1	1	1	1	0	0	1		Q7SAR3	A2R9E3	g14581.t1
SNF2-related	IPR000330_PF00176	Cluster_20	0	0	0	0	0	0	1	1	1	1	1	0	1	1	1	1	1	1	1	1	1	1	1	0	0	0	1		Q7SBI2	A2R9E2	g2261.t1
SNF2-related	IPR000330_PF00176	Cluster_21	0	0	0	0	0	0	0	0	0	0	0	0	1	0	1	3	0	0	2	2	1	0	0	0	0	0	1		Q7SHJ1
Rap GTPase activating protein domain	IPR000331_PF02145	Cluster_1	6	1	1	1	0	1	1	1	1	1	1	1	1	1	1	1	1	1	1	1	1	1	1	1	1	1	1		Q8NIX2	A2R4Q5	g9480.t1
Glycoside hydrolase, family 45	IPR000334_PF02015	Cluster_1	5	0	0	1	0	0	0	0	0	0	0	2	1	1	0	0	0	0	1	1	2	2	1	0	3	0	1		Q872Q1		g3430.t1
Dual specificity phosphatase, catalytic domain	IPR000340_PF00782	Cluster_1	0	1	1	1	1	1	1	1	1	1	1	1	1	1	1	1	1	1	1	1	1	1	1	1	1	1	1	Q00684	Q7SCM5	A2QDS6	g2095.t1
Dual specificity phosphatase, catalytic domain	IPR000340_PF00782	Cluster_2	2	1	1	1	2	1	0	1	1	1	0	1	1	0	1	1	1	1	1	1	1	1	1	1	0	1	1	P38590,P40479	Q7SB61	A2QNV1	g15365.t1
Dual specificity phosphatase, catalytic domain	IPR000340_PF00782	Cluster_3	0	1	1	1	1	0	1	1	1	1	1	2	1	1	1	1	1	1	1	1	1	1	1	1	0	0	1	Q02256	Q7S4J2	A5AAK0	g10786.t1
Dual specificity phosphatase, catalytic domain	IPR000340_PF00782	Cluster_5	1	1	1	0	0	1	1	1	1	1	1	1	1	1	1	1	1	1	1	1	1	1	1	0	0	0	1		Q7S2X5	A2RAS3	g14166.t1
Dual specificity phosphatase, catalytic domain	IPR000340_PF00782	Cluster_6	0	1	1	0	0	0	1	0	1	1	1	1	1	1	1	0	1	1	1	1	1	1	1	0	0	0	1		Q7SAI0	A2QCM1	g16124.t1
Dual specificity phosphatase, catalytic domain	IPR000340_PF00782	Cluster_7	0	0	0	0	0	0	1	1	1	1	1	1	1	1	1	1	0	0	1	1	1	1	1	0	0	0	1		Q7SAA1	A2QRG8	g6454.t1
Regulator of G protein signalling domain	IPR000342_PF00615	Cluster_1	3	1	1	1	0	1	1	1	1	1	1	1	1	1	1	1	1	1	1	2	1	1	1	1	1	1	1		Q7SGS0	A2Q9J9	g2681.t1
Regulator of G protein signalling domain	IPR000342_PF00615	Cluster_2	4	0	0	0	1	1	1	1	1	1	1	1	1	0	1	1	1	1	2	2	1	1	1	1	1	1	1	P11972	Q7SA69	A2QCD2	g181.t1
Regulator of G protein signalling domain	IPR000342_PF00615	Cluster_3	1	1	1	1	0	1	1	1	1	1	1	1	1	1	1	1	1	1	1	1	1	1	1	1	1	1	1		Q7RZC0	A2QPX7	g13114.t1
Regulator of G protein signalling domain	IPR000342_PF00615	Cluster_4	0	0	0	1	0	1	1	2	1	1	2	1	1	1	1	1	2	1	1	2	1	0	1	0	0	0	1		Q7RV25	A2RBB1	g15873.t1
Peptide chain release factor class I/class II	IPR000352_PF00472	Cluster_1	1	1	1	1	1	1	1	1	1	1	1	1	1	1	1	1	1	1	1	1	1	1	1	2	1	1	1	P30775	Q870U1	A2QY42	g210.t1
Peptide chain release factor class I/class II	IPR000352_PF00472	Cluster_2	1	1	1	1	1	1	1	0	1	0	1	1	1	1	1	1	1	1	1	1	1	0	1	0	0	0	1	Q05863	Q96U13	A2R4Q7	g4049.t1
Peptide chain release factor class I/class II	IPR000352_PF00472	Cluster_3	0	1	1	0	1	1	0	1	1	0	1	0	0	0	1	1	1	1	1	1	1	0	1	0	1	1	1	Q12322		A2R7G0	g15156.t1
Ribonucleotide reductase small subunit	IPR000358_PF00268	Cluster_1	2	1	2	1	2	1	1	1	1	1	1	1	1	1	1	1	1	1	1	1	1	1	1	3	1	1	1	P09938,P49723	Q9C167	A2R480	g11390.t1
FeS cluster biogenesis	IPR000361_PF01521	Cluster_1	2	1	1	1	1	1	1	1	1	1	1	1	1	0	1	1	1	1	1	1	1	1	1	1	0	1	1	Q07821	Q7SCG5	A2QJ69	g9681.t1
FeS cluster biogenesis	IPR000361_PF01521	Cluster_2	1	1	1	1	1	1	1	0	1	1	1	1	0	1	1	1	1	1	1	1	1	1	0	0	1	1	1	Q12425		A2R7S9
GPCR fungal pheromone mating factor, STE2	IPR000366_PF02116	Cluster_1	0	0	0	0	0	0	0	0	0	0	0	0	1	1	1	2	1	1	1	1	0	1	1	0	0	0	1		Q8NIR1		g5990.t1
Phosphatidate cytidylyltransferase	IPR000374_PF01148	Cluster_1	3	1	1	1	1	1	1	1	1	1	1	1	1	1	1	1	1	1	1	1	1	1	1	1	1	0	1	P38221	Q7S279	A2QPI5	g2506.t1
Phosphatidate cytidylyltransferase	IPR000374_PF01148	Cluster_2	0	1	1	1	1	1	1	1	1	1	1	1	1	1	1	1	1	1	1	1	1	0	1	0	0	0	1	Q12382	Q7RY21	A2QE28	g14268.t1
Phosphatidate cytidylyltransferase	IPR000374_PF01148	Cluster_3	0	0	0	0	0	0	0	1	1	1	0	1	0	0	1	1	1	1	1	1	1	0	0	0	0	0	1			A2QIL6
Dynamin central domain	IPR000375_PF01031	Cluster_3	1	0	0	1	0	1	1	1	1	1	1	1	1	2	1	1	1	1	1	1	1	1	1	1	0	0	1		Q7S7E1	A2QQZ6	g3294.t1
Cyclic-AMP phosphodiesterase, class-II	IPR000396_PF02112	Cluster_1	0	0	0	0	0	1	1	1	1	1	1	1	1	1	1	1	1	1	1	1	1	1	1	0	0	0	1		Q7RZX4	A2QAW4	g5583.t1
Thymidylate synthase	IPR000398_PF00303	Cluster_1	1	1	1	1	1	1	1	1	1	1	1	0	1	1	1	1	1	1	1	1	1	1	1	1	1	0	1	P06785	Q7S072	A2R2F6	g3220.t1
Phosphatidylinositol 3-/4-kinase, catalytic domain	IPR000403_PF00454	Cluster_1	2	1	1	1	2	1	1	1	1	1	1	1	1	2	1	1	1	1	1	1	1	1	1	1	1	1	1	P35169,P32600	Q7S6V7	A2R7T9	g691.t1
Phosphatidylinositol 3-/4-kinase, catalytic domain	IPR000403_PF00454	Cluster_2	1	1	1	1	1	1	1	1	1	1	1	1	1	1	1	1	1	1	1	1	1	1	1	1	1	1	1	P22543	Q7SHZ6	A2QN92	g4888.t1
Phosphatidylinositol 3-/4-kinase, catalytic domain	IPR000403_PF00454	Cluster_3	2	1	1	1	1	1	1	1	1	1	1	1	1	1	1	1	1	1	1	1	1	1	1	1	0	1	1	P38811	Q7S7K6	A5AAC6	g6832.t1
Phosphatidylinositol 3-/4-kinase, catalytic domain	IPR000403_PF00454	Cluster_4	1	1	1	1	1	1	1	1	1	1	1	1	1	1	1	1	0	1	1	1	1	1	1	1	1	1	1	P38111	Q7SI27	A2R2A3	g4149.t1
Phosphatidylinositol 3-/4-kinase, catalytic domain	IPR000403_PF00454	Cluster_5	1	1	1	1	1	1	1	1	1	1	1	1	1	1	1	1	1	1	1	1	1	1	1	0	1	1	1	P42951	Q7RW65	A2QC44	g15201.t1
Phosphatidylinositol 3-/4-kinase, catalytic domain	IPR000403_PF00454	Cluster_6	2	1	0	1	1	1	0	1	1	1	1	1	1	1	1	1	1	1	1	1	1	1	1	1	1	1	1	P37297	Q7SCR6	A2R164	g15518.t1
Phosphatidylinositol 3-/4-kinase, catalytic domain	IPR000403_PF00454	Cluster_7	0	1	1	1	1	1	1	1	0	1	1	1	1	1	1	1	1	1	1	1	1	1	1	1	0	1	1	P38110	Q7RZT9		g7669.t1
Phosphatidylinositol 3-/4-kinase, catalytic domain	IPR000403_PF00454	Cluster_8	1	1	1	1	1	1	0	0	0	0	0	1	0	1	1	1	1	1	0	1	1	1	1	1	1	1	1	P39104			g10971.t1
RHO protein GDP dissociation inhibitor	IPR000406_PF02115	Cluster_1	2	0	0	0	0	0	1	1	1	1	1	1	1	1	1	1	1	1	1	1	1	1	1	0	0	0	1		Q7RVX7	A2RAW5	g3242.t1
Nucleoside phosphatase GDA1/CD39	IPR000407_PF01150	Cluster_1	3	1	1	1	1	2	1	1	1	1	1	1	1	1	1	1	1	1	1	1	1	1	1	1	1	1	1	P32621	Q9C2M0	A2QR17	g8781.t1
Nucleoside phosphatase GDA1/CD39	IPR000407_PF01150	Cluster_2	1	2	1	2	1	2	1	1	1	1	1	1	1	1	1	1	1	1	1	1	1	1	1	1	1	1	1	P40009	Q7SAL4	A2R2Y3	g12846.t1
Regulator of chromosome condensation, RCC1	IPR000408_PF00415	Cluster_3	1	0	0	0	1	1	1	1	0	1	0	1	1	1	1	1	0	1	1	1	1	1	1	0	0	1	1	P31386	Q7RXX6		g9428.t1
BEACH domain	IPR000409_PF02138	Cluster_1	1	1	1	1	1	1	1	1	1	1	1	1	1	1	1	1	1	1	1	1	1	1	1	1	1	1	1	P25356	Q7SHY2	A2QMZ5	g3181.t1
Nitroreductase-like	IPR000415_PF00881	Cluster_1	0	0	0	0	0	0	0	3	2	2	2	1	1	1	1	2	1	1	1	2	1	0	1	0	0	0	1		Q9HE35	A2R499,A2QJH7	g8416.t1
Hydroxyethylthiazole kinase	IPR000417_PF02110	Cluster_1	1	1	1	1	1	1	1	1	1	1	1	1	1	1	1	1	1	1	1	1	1	0	1	1	1	1	1	P41835	Q7RXP3	A2QZE7	g2251.t1
Yeast PIR protein repeat	IPR000420_PF00399	Cluster_1	0	0	0	2	5	1	0	0	0	0	0	1	1	1	1	0	1	1	0	0	0	1	0	0	0	0	1	P47001,P32478,Q03178,Q03180,P46999	Q7S1Y4
3,4-dihydroxy-2-butanone 4-phosphate synthase, RibB	IPR000422_PF00926	Cluster_1	0	0	0	0	0	0	1	1	1	1	1	1	1	1	1	1	1	1	1	1	1	1	1	0	0	0	1		Q7S213	A2QSD5	g7367.t1
Primosome PriB/single-strand DNA-binding	IPR000424_PF00436	Cluster_1	0	0	0	0	0	0	0	0	0	0	0	0	1	1	1	1	1	1	1	1	1	1	1	0	0	0	1		Q7RWV6		g2266.t1
Proteasome alpha-subunit, N-terminal domain	IPR000426_PF10584	Cluster_1	2	1	1	1	1	1	1	1	1	1	1	1	1	0	1	1	1	1	1	1	1	0	1	1	1	1	1	P32379	Q7S903	A2QCF6	g317.t1
Proteasome alpha-subunit, N-terminal domain	IPR000426_PF10584	Cluster_2	2	1	1	1	1	1	1	1	1	1	1	1	1	1	1	1	1	1	1	1	1	1	1	0	0	0	1	P23638	Q7S2D6	A2QWW7	g8049.t1
Proteasome alpha-subunit, N-terminal domain	IPR000426_PF10584	Cluster_3	0	1	0	1	1	1	1	1	1	1	1	1	1	1	1	1	1	0	1	1	1	0	1	0	0	0	1	P23639	Q8X077	A2QMG4	g5837.t1
Proteasome alpha-subunit, N-terminal domain	IPR000426_PF10584	Cluster_4	0	0	0	0	0	1	0	1	1	1	1	1	1	1	1	1	1	1	1	1	1	1	1	0	0	0	1		Q7S051	A5AA96	g263.t1
Proteasome alpha-subunit, N-terminal domain	IPR000426_PF10584	Cluster_5	0	0	0	0	0	0	1	1	1	1	1	0	1	1	1	1	1	1	1	1	1	1	1	0	0	0	1		Q86ZH0	A2R4I2	g4317.t1
Proteasome alpha-subunit, N-terminal domain	IPR000426_PF10584	Cluster_6	0	0	0	1	1	1	0	1	1	0	0	1	1	1	1	1	1	1	1	1	1	0	0	0	0	0	1	P40303	Q7RYX7	A2QEE5
Proteasome alpha-subunit, N-terminal domain	IPR000426_PF10584	Cluster_7	0	0	0	0	0	0	0	1	1	1	0	0	1	1	1	1	1	1	1	1	1	1	1	0	0	0	1		Q7SG71	A2RBI1	g600.t1
DNA mismatch repair protein MutS, C-terminal	IPR000432_PF00488	Cluster_2	1	1	1	1	1	1	1	1	1	1	1	1	1	1	1	1	1	1	1	1	1	1	1	1	1	1	1	P25847	O13396	A2R7H2	g7185.t1
DNA mismatch repair protein MutS, C-terminal	IPR000432_PF00488	Cluster_3	1	1	1	1	1	1	1	1	1	1	1	1	1	1	1	1	1	1	0	1	1	1	1	1	1	1	1	P25846	Q7S0U7	A2R8R7	g13024.t1
DNA mismatch repair protein MutS, C-terminal	IPR000432_PF00488	Cluster_4	0	0	1	0	1	0	1	1	1	0	1	1	0	1	1	1	1	1	1	1	1	1	1	1	1	1	1	P40965		A2Q911	g2640.t1
DNA mismatch repair protein MutS, C-terminal	IPR000432_PF00488	Cluster_5	0	0	1	0	1	0	1	0	1	0	1	1	1	1	1	1	1	1	1	1	1	1	1	1	1	0	1	Q12175	Q7SCW0	A2QQR7	g6633.t1
Zinc finger, ZZ-type	IPR000433_PF00569	Cluster_1	1	1	1	1	1	1	1	0	1	1	1	1	0	1	1	1	1	1	1	1	1	1	1	0	1	0	1	Q02336		A2QD51	g1185.t1
Zinc finger, ZZ-type	IPR000433_PF00569	Cluster_2	1	0	0	0	0	0	1	1	1	1	1	1	1	1	1	1	1	1	1	0	1	1	1	3	0	2	1		Q96TZ7	A2QXZ6	g313.t1
Zinc finger, ZZ-type	IPR000433_PF00569	Cluster_3	1	0	0	0	0	1	1	1	1	1	1	1	1	1	1	1	1	1	1	1	1	1	1	0	0	0	1		Q7SCY9	A2QPE2	g1795.t1
Ribosomal protein L15e	IPR000439_PF00827	Cluster_1	4	1	1	1	2	1	1	1	1	1	1	1	1	1	1	1	1	1	1	1	1	1	1	1	0	1	1	P05748,P54780	Q8X034	A2Q887	g15354.t1
Helix-hairpin-helix motif	IPR000445_PF00633	Cluster_1	1	0	1	1	1	1	1	1	1	1	1	1	2	1	1	1	1	1	1	1	1	1	1	1	1	0	1	P31378	Q7RX62,Q8X0U3	A2QUZ6	g1459.t1
Ubiquitin-associated domain/translation elongation factor EF-Ts, N-terminal	IPR000449_PF00627	Cluster_1	1	1	1	1	1	1	1	1	1	1	1	1	1	1	1	1	1	1	1	1	1	1	1	2	1	1	1	P38237	Q7S5R6	A2QFL7	g168.t1
Ubiquitin-associated domain/translation elongation factor EF-Ts, N-terminal	IPR000449_PF00627	Cluster_2	2	1	1	1	1	1	1	1	1	1	1	0	1	1	1	1	1	1	1	1	1	1	1	1	1	1	1	P48510	Q7SGY8	A5AB45	g10230.t1
Ubiquitin-associated domain/translation elongation factor EF-Ts, N-terminal	IPR000449_PF00627	Cluster_3	1	1	1	1	1	1	1	1	0	1	1	1	1	1	1	1	1	1	1	1	1	1	1	1	1	2	1	P32628	Q7S306		g2077.t1
Ubiquitin-associated domain/translation elongation factor EF-Ts, N-terminal	IPR000449_PF00627	Cluster_4	2	0	1	1	1	1	1	1	1	1	1	1	1	1	1	0	0	0	1	1	1	1	1	1	1	1	1	P34216	Q7SC12	A2Q8V0	g13422.t1
Ubiquitin-associated domain/translation elongation factor EF-Ts, N-terminal	IPR000449_PF00627	Cluster_5	0	0	0	1	1	1	1	1	1	1	1	1	1	1	0	1	1	1	1	0	1	1	1	1	0	0	1	P40087	Q7S906	A2QMB1	g325.t1
Chorismate synthase	IPR000453_PF01264	Cluster_1	1	1	1	1	1	1	1	1	0	1	1	1	1	1	1	1	1	1	1	1	1	1	1	1	1	1	1	P28777	Q12640		g1060.t1
Ribosomal protein L17	IPR000456_PF01196	Cluster_1	2	0	0	0	1	0	1	1	1	1	1	1	1	1	1	1	1	1	1	1	1	1	1	0	1	0	1	P22353	Q9P750	A2QQ17	g13263.t1
CDP-alcohol phosphatidyltransferase	IPR000462_PF01066	Cluster_1	1	1	1	1	1	1	1	2	1	1	1	1	1	1	1	2	1	1	1	1	1	1	1	1	1	1	1	P06197	Q870T3	A2QB75	g9942.t1
CDP-alcohol phosphatidyltransferase	IPR000462_PF01066	Cluster_2	2	1	1	1	2	1	1	1	1	1	1	1	1	1	1	1	1	1	1	1	1	1	1	1	0	1	1	P17898,P22140	Q7SFN8	A2QXP1	g9180.t1
CDP-alcohol phosphatidyltransferase	IPR000462_PF01066	Cluster_3	1	1	1	1	1	1	1	1	1	1	1	1	1	1	1	1	0	1	1	1	1	0	1	1	1	2	1	P08456	Q7S4U6	A2Q9X9	g9649.t1
CDP-alcohol phosphatidyltransferase	IPR000462_PF01066	Cluster_4	0	1	1	1	1	1	1	0	1	1	1	1	1	1	1	1	1	1	1	1	1	1	1	1	0	1	1	Q07560	Q7RWV8	A2R4N3	g16221.t1
CDP-alcohol phosphatidyltransferase	IPR000462_PF01066	Cluster_5	2	0	0	0	0	1	1	1	1	0	1	1	1	1	1	1	1	1	1	1	1	1	1	0	0	1	1		Q7SGU6	A2R8P4	g6503.t1
G-patch domain	IPR000467_PF01585	Cluster_1	2	0	1	1	1	1	0	1	0	1	1	1	1	1	1	1	1	1	1	1	1	1	1	0	1	1	1	P53866	Q7S3Y7		g9260.t1
G-patch domain	IPR000467_PF01585	Cluster_2	1	0	0	0	0	1	1	1	1	1	1	1	1	1	1	1	1	1	1	1	1	1	1	1	1	1	1		Q7S0X4	A2QIV6	g6554.t1
G-patch domain	IPR000467_PF01585	Cluster_3	1	0	0	0	0	0	1	1	1	1	1	1	1	1	1	1	1	1	1	1	1	1	1	1	1	1	1		Q7S7F5	A5AAI7	g4619.t1
G-patch domain	IPR000467_PF01585	Cluster_4	1	0	0	0	0	0	1	1	1	1	1	0	1	1	1	1	1	1	1	1	1	1	0	1	1	1	1		Q7S6A8	A2QQQ4
G-patch domain	IPR000467_PF01585	Cluster_5	0	0	0	0	0	0	1	1	1	1	1	0	1	1	1	1	1	1	1	1	1	1	1	0	1	1	1		Q7SEW3	A2QF41	g10822.t1
G-patch domain	IPR000467_PF01585	Cluster_7	0	0	0	0	0	0	1	1	1	1	1	0	1	1	1	1	1	1	1	1	1	1	1	0	0	0	1		Q7S9T8	A2R3C5	g3533.t1
G-patch domain	IPR000467_PF01585	Cluster_8	0	0	0	0	0	0	1	1	1	1	1	1	1	1	1	0	1	1	1	1	1	0	1	0	0	0	1		Q7SH51	A2R8Z4	g12512.t1
Reverse transcriptase	IPR000477_PF00078	Cluster_3	0	0	1	1	1	1	1	1	1	1	1	1	1	1	0	0	1	1	1	0	1	0	1	1	1	0	1	Q06163	Q7SD71	A2R1G6	g4759.t1
Pterin-binding	IPR000489_PF00809	Cluster_1	0	0	0	0	0	0	1	1	1	1	1	1	1	1	1	1	1	1	1	1	1	1	1	0	0	0	1		Q7S032	A2R801	g11903.t1
Glycoside hydrolase, family 17	IPR000490_PF00332	Cluster_1	1	1	1	1	0	1	0	0	0	0	0	1	1	0	1	1	1	1	1	1	0	0	1	1	2	1	1		Q7S169		g13834.t1
RNA recognition motif domain	IPR000504_PF00076	Cluster_1	3	1	1	1	1	1	1	1	1	1	1	1	1	1	1	1	1	1	1	1	1	1	1	1	1	1	1	P04147	Q7S6N6	A2Q848	g10395.t1
RNA recognition motif domain	IPR000504_PF00076	Cluster_2	1	1	1	1	1	1	1	1	1	1	1	1	1	1	1	1	1	1	1	1	1	1	1	1	1	1	1	Q06106	Q7SG09	A2Q8B7	g15928.t1
RNA recognition motif domain	IPR000504_PF00076	Cluster_3	0	1	1	1	1	1	1	1	1	1	1	1	1	1	1	1	1	1	1	1	1	1	1	1	1	1	1	Q08925	Q7RYW0	A2QFD1	g12144.t1
RNA recognition motif domain	IPR000504_PF00076	Cluster_4	1	0	0	0	0	0	1	1	1	1	1	1	1	1	1	1	1	1	1	1	1	1	1	1	1	0	1		Q871A4	A2QY98	g15945.t1
RNA recognition motif domain	IPR000504_PF00076	Cluster_5	0	0	0	0	0	1	1	1	1	1	1	1	1	1	1	1	1	1	1	1	1	1	1	0	0	0	1		Q7SBC4	A2QFB4	g14889.t1
RNA recognition motif domain	IPR000504_PF00076	Cluster_6	0	0	0	0	0	0	1	1	1	1	1	1	1	1	1	1	1	1	1	1	1	1	1	0	0	0	1		Q7SAS0	A2QQZ9	g11379.t1
RNA recognition motif domain	IPR000504_PF00076	Cluster_7	0	0	0	0	0	0	1	1	1	1	1	1	1	1	1	1	1	1	1	1	1	1	1	0	0	0	1		Q7RVN7	A2QB77	g13401.t1
RNA recognition motif domain	IPR000504_PF00076	Cluster_8	0	0	0	0	0	0	1	1	1	1	1	1	1	1	1	1	1	1	1	1	1	1	1	0	0	0	1		Q7SFW1	A2QY90	g16135.t1
RNA recognition motif domain	IPR000504_PF00076	Cluster_9	0	0	0	0	0	1	1	1	1	1	1	1	1	1	1	1	1	1	0	1	1	1	1	0	0	0	1		Q871T2	A2QEE4	g1616.t1
RNA recognition motif domain	IPR000504_PF00076	Cluster_12	0	0	0	0	0	0	1	1	1	1	1	1	1	1	1	1	1	1	1	1	1	1	1	0	0	0	1		Q7SBA6	A2QHP3	g2228.t1
RNA recognition motif domain	IPR000504_PF00076	Cluster_13	0	0	0	0	0	0	1	1	1	1	1	1	1	1	1	1	1	1	1	1	1	1	1	0	0	0	1		Q7S1V1	A2QNE2	g4673.t1
RNA recognition motif domain	IPR000504_PF00076	Cluster_14	0	0	0	0	0	0	1	1	1	1	1	1	1	1	1	1	1	1	1	1	1	1	1	0	0	0	1		Q7RZE6	A2QWS2	g5368.t1
RNA recognition motif domain	IPR000504_PF00076	Cluster_15	0	0	0	0	0	0	1	1	1	1	1	1	1	1	1	1	1	1	1	1	1	1	0	0	0	0	1		Q8X0N0	A2R9C2
RNA recognition motif domain	IPR000504_PF00076	Cluster_16	0	0	0	0	0	0	1	1	1	1	1	1	1	1	1	1	1	0	1	1	1	1	1	0	0	0	1		Q7SDG9	A2QMQ0	g8299.t1
RNA recognition motif domain	IPR000504_PF00076	Cluster_18	0	0	0	0	0	0	1	0	1	1	0	1	1	1	1	1	1	1	1	1	1	1	1	0	0	0	1		Q7S480	A2QLJ3	g9285.t1
RNA recognition motif domain	IPR000504_PF00076	Cluster_19	0	0	0	0	0	0	0	0	0	0	0	0	1	1	1	1	1	1	1	1	1	1	1	0	0	0	1		Q7SAJ5		g7704.t1
RNA recognition motif domain	IPR000504_PF00076	Cluster_20	0	0	0	0	0	0	0	0	0	0	0	0	1	1	1	1	1	1	1	1	1	1	1	0	0	0	1		Q7S8Q6		g455.t1
RNA recognition motif domain	IPR000504_PF00076	Cluster_21	0	0	0	0	0	0	0	0	0	0	0	0	1	1	1	1	1	1	1	1	1	1	1	0	0	0	1		Q7S2L7		g4734.t1
RNA recognition motif domain	IPR000504_PF00076	Cluster_22	0	0	0	0	0	0	0	0	0	0	0	0	0	1	1	1	1	1	0	0	1	0	1	0	0	0	1				g5918.t1
RNA recognition motif domain	IPR000504_PF00076	Cluster_23	0	0	0	0	0	0	0	0	0	0	0	0	0	1	1	1	1	1	1	1	1	0	1	0	0	0	1				g7649.t1
RNA recognition motif domain	IPR000504_PF00076	Cluster_24	0	0	0	0	0	0	0	0	0	0	0	0	1	1	1	1	1	1	1	1	1	0	1	0	0	0	1		Q7SEI3		g4179.t1
RNA recognition motif domain	IPR000504_PF00076	Cluster_25	0	0	0	0	0	0	0	0	0	0	0	0	1	1	0	1	1	1	0	1	1	1	1	0	0	0	1		Q7SF93		g9207.t1
RNA recognition motif domain	IPR000504_PF00076	Cluster_26	0	0	0	0	0	0	0	0	0	0	0	0	0	1	1	1	1	1	1	1	1	0	1	0	0	0	1				g8528.t1
RNA recognition motif domain	IPR000504_PF00076	Cluster_28	0	0	0	0	0	0	0	0	0	0	0	0	0	0	1	1	1	1	1	0	1	1	1	0	0	0	1				g4039.t1
RNA recognition motif domain	IPR000504_PF00076	Cluster_29	0	0	0	0	0	0	0	0	0	0	0	0	0	0	1	1	1	1	1	1	1	0	0	0	0	0	1
Acetohydroxy acid isomeroreductase C-terminal	IPR000506_PF01450	Cluster_1	1	1	1	1	1	1	1	1	1	1	1	1	1	1	1	1	1	1	1	1	1	1	1	1	1	1	1	P06168	P38674	A2QU08	g11164.t1
Ribosomal protein L36e	IPR000509_PF01158	Cluster_1	3	1	1	1	2	0	0	1	1	1	1	1	1	1	1	1	1	1	1	1	1	1	1	1	0	1	1	P05745,O14455	Q7SEP1	A2QI04	g486.t1
Cytochrome c/c1 haem-lyase	IPR000511_PF01265	Cluster_1	1	1	1	1	1	1	1	1	1	1	1	1	1	1	1	1	1	1	1	1	1	1	1	1	1	1	1	Q00873	Q7S3Z2	A5AAK6	g1480.t1
Cytochrome c/c1 haem-lyase	IPR000511_PF01265	Cluster_2	0	1	1	1	1	1	1	1	1	1	1	1	1	1	1	1	1	1	1	1	1	1	1	1	1	1	1	P06182	P14187	A2R2C3	g712.t1
Semialdehyde dehydrogenase, NAD-binding	IPR000534_PF01118	Cluster_1	1	1	1	1	1	1	1	0	1	1	1	1	1	1	1	1	2	1	1	3	1	1	1	1	1	2	1	Q01217	P54898	A2R068	g2408.t1
Semialdehyde dehydrogenase, NAD-binding	IPR000534_PF01118	Cluster_2	1	1	1	1	1	1	1	1	1	1	1	1	1	1	1	1	1	1	1	2	1	1	1	1	1	1	1	P13663	Q7SF95	A2QXM6	g10744.t1
MSP domain	IPR000535_PF00635	Cluster_1	2	1	1	1	2	1	0	1	1	1	1	1	1	1	1	1	0	1	1	1	1	1	1	1	1	1	1	Q6Q595,P40075	Q871I7	A2QHW8	g4611.t1
UbiA prenyltransferase family	IPR000537_PF01040	Cluster_2	2	1	1	1	1	1	1	1	1	1	1	1	1	1	1	1	1	1	1	1	1	1	1	1	1	2	1	P21592	Q7S5E7	A2QID3	g1328.t1
Acyltransferase ChoActase/COT/CPT	IPR000542_PF00755	Cluster_1	4	1	1	1	1	1	1	1	0	2	1	1	1	1	1	1	1	1	1	2	1	1	1	4	2	4	1	P32796	Q7SAN8		g12052.t1
Acyltransferase ChoActase/COT/CPT	IPR000542_PF00755	Cluster_2	2	2	2	2	2	1	1	1	1	1	1	1	1	1	1	1	1	1	1	1	1	1	1	1	1	1	1	P80235,P40017	Q9P606	A2QR71	g14936.t1
Clathrin, heavy chain/VPS, 7-fold repeat	IPR000547_PF00637	Cluster_1	1	1	1	1	1	1	1	1	1	1	1	2	1	1	1	1	1	1	1	1	1	1	1	1	1	1	1	P22137	Q7SHV2	A2QI29	g3093.t1
Clathrin, heavy chain/VPS, 7-fold repeat	IPR000547_PF00637	Cluster_2	1	1	1	1	1	1	0	1	1	1	1	1	1	1	1	1	1	1	1	1	1	1	1	1	1	0	1	P38959	Q7S403	A5AA88	g3682.t1
Clathrin, heavy chain/VPS, 7-fold repeat	IPR000547_PF00637	Cluster_3	2	0	4	0	1	1	1	0	0	0	0	1	1	1	1	1	1	1	1	1	1	1	1	0	1	1	1	P27801	Q7SBI8		g8605.t1
Clathrin, heavy chain/VPS, 7-fold repeat	IPR000547_PF00637	Cluster_4	1	0	0	0	0	1	1	1	1	1	1	1	1	1	1	1	1	1	1	1	1	1	1	1	0	1	1		Q7SC32	A2QVC8	g1065.t1
7,8-Dihydro-6-hydroxymethylpterin-pyrophosphokinase, HPPK	IPR000550_PF01288	Cluster_1	0	0	0	0	0	0	1	1	1	1	1	1	1	1	1	1	1	1	1	1	1	1	1	0	0	0	1		Q7S032	A2R801	g11903.t1
Ribosomal protein L44e	IPR000552_PF00935	Cluster_1	3	1	1	1	1	1	0	0	1	1	1	1	1	1	1	1	1	1	1	1	1	1	1	1	1	1	1	P02405	Q7RVK8	A2QKM9	g15335.t1
Ribosomal protein S7e	IPR000554_PF01251	Cluster_1	0	0	0	0	0	0	0	0	0	0	0	0	1	1	1	1	1	1	1	1	1	1	0	0	0	0	1		O43105
JAB/MPN domain	IPR000555_PF01398	Cluster_1	2	1	1	1	1	1	1	1	1	1	1	1	1	1	1	1	1	1	1	1	1	1	1	1	1	2	1	Q08723	Q8WZY4	A2QPP0	g10346.t1
JAB/MPN domain	IPR000555_PF01398	Cluster_2	2	1	1	1	1	1	1	1	1	1	1	1	1	1	1	1	1	1	1	1	1	1	1	1	1	1	1	P43588	Q7SEB1	A5AAY7	g10277.t1
JAB/MPN domain	IPR000555_PF01398	Cluster_3	1	1	1	1	1	1	1	1	1	1	1	1	1	1	1	1	1	1	1	1	1	1	1	1	1	1	1	Q12468	Q7RXX8	A2R651	g7658.t1
JAB/MPN domain	IPR000555_PF01398	Cluster_4	2	0	1	0	0	1	1	1	1	1	1	0	1	1	1	1	1	1	1	1	1	1	1	1	1	0	1		Q7S9Y9	A2QQA2	g3836.t1
JAB/MPN domain	IPR000555_PF01398	Cluster_5	1	0	0	0	0	1	1	1	1	1	1	1	1	1	1	1	1	1	1	1	1	1	1	1	1	1	1		Q9P748	A2QQ10	g12363.t1
JAB/MPN domain	IPR000555_PF01398	Cluster_6	1	0	0	1	0	1	1	1	1	1	1	1	1	1	1	1	1	1	1	1	1	1	1	0	0	0	1		Q7S0H7	A2QEW6	g3652.t1
JAB/MPN domain	IPR000555_PF01398	Cluster_7	0	0	0	0	0	0	0	1	1	1	1	1	1	1	1	1	1	1	1	1	1	1	1	0	0	0	1		Q7S8C8	A2R9A6	g7802.t1
Formate-tetrahydrofolate ligase, FTHFS	IPR000559_PF01268	Cluster_1	2	2	2	2	2	2	1	1	1	1	1	1	1	1	1	1	1	1	1	1	1	1	1	1	1	1	1	P07245,P09440	Q7RXH3	A2QEV9	g6038.t1
Histidine phosphatase superfamily, clade-2	IPR000560_PF00328	Cluster_1	3	0	1	1	1	1	1	1	0	1	1	1	1	1	1	1	1	1	1	1	1	1	1	1	1	2	1	Q06685	Q7S8D6		g376.t1
Histidine phosphatase superfamily, clade-2	IPR000560_PF00328	Cluster_2	0	0	0	0	0	0	1	1	1	1	1	1	1	2	1	1	1	1	1	1	5	1	1	2	0	0	1		Q7S9V5	O93838	g3545.t1
Histidine phosphatase superfamily, clade-2	IPR000560_PF00328	Cluster_3	0	0	0	0	0	0	0	1	1	0	0	2	1	1	1	2	1	1	1	1	1	1	1	2	1	2	1		Q7SEH2	A2R685	g3772.t1
Histidine phosphatase superfamily, clade-2	IPR000560_PF00328	Cluster_4	0	0	0	0	0	0	1	2	1	1	1	1	1	2	0	1	1	1	3	2	0	1	1	0	0	0	1		Q7S926	A2R6Z4	g10435.t1
Histidine phosphatase superfamily, clade-2	IPR000560_PF00328	Cluster_5	0	0	0	0	0	0	1	1	1	1	0	1	1	1	1	1	1	1	1	1	1	1	1	0	0	0	1		Q7RYV9	A2QAA3	g12142.t1
Histidine phosphatase superfamily, clade-2	IPR000560_PF00328	Cluster_6	0	0	0	0	0	0	0	1	1	0	0	2	0	1	0	0	1	1	2	2	1	0	0	0	0	0	1			A2QH82
Histidine phosphatase superfamily, clade-2	IPR000560_PF00328	Cluster_7	0	0	0	0	0	0	0	1	1	1	1	1	0	1	0	0	1	0	1	1	1	1	1	0	0	0	1			A2QT03	g3161.t1
Histidine phosphatase superfamily, clade-2	IPR000560_PF00328	Cluster_10	0	0	0	0	0	0	0	0	0	0	0	0	0	0	1	0	1	1	1	1	1	1	0	0	0	0	1
HECT	IPR000569_PF00632	Cluster_2	1	1	0	1	1	1	1	1	1	1	1	1	1	1	1	1	1	1	1	1	1	1	1	1	1	2	1	P53119	Q7S6N5	A2Q849	g10396.t1
HECT	IPR000569_PF00632	Cluster_3	1	1	1	1	1	1	1	1	1	1	1	1	1	1	1	1	1	1	1	1	1	1	1	1	1	1	1	P33202	Q7S5Y8	A2QWV8	g5371.t1
HECT	IPR000569_PF00632	Cluster_4	1	1	1	1	1	1	1	1	1	1	1	0	1	1	1	1	1	1	1	1	1	1	1	0	0	1	1	P40985	Q873C0	A2Q888	g4297.t1
HECT	IPR000569_PF00632	Cluster_5	1	0	0	0	0	0	1	1	1	1	1	1	1	1	1	1	1	1	1	1	1	1	1	0	0	0	1		Q870N1	A5ABL0	g7367.t1
Zinc finger, CCCH-type	IPR000571_PF00642	Cluster_1	1	1	2	1	1	1	2	1	2	2	2	2	1	1	2	2	1	1	2	1	1	2	2	3	2	1	1	Q06102	Q7SGR2	A2Q8S1,A2R8I1	g5885.t1,g2736.t1
Zinc finger, CCCH-type	IPR000571_PF00642	Cluster_2	2	1	1	0	0	1	0	1	1	1	1	1	1	1	1	1	1	1	1	1	1	1	1	1	1	1	1		Q7SEG7	A2Q7K7	g12507.t1
Zinc finger, CCCH-type	IPR000571_PF00642	Cluster_3	1	1	1	1	1	1	1	0	1	1	1	1	1	1	0	0	1	1	1	2	1	1	1	1	1	1	1	P53769	Q7SDY3	A2QCY6	g4540.t1
Zinc finger, CCCH-type	IPR000571_PF00642	Cluster_4	1	0	1	1	0	1	1	1	1	1	1	1	1	1	1	1	1	1	1	1	1	1	1	1	0	1	1		Q8X044	A2R3S6	g10890.t1
Zinc finger, CCCH-type	IPR000571_PF00642	Cluster_5	0	1	1	2	1	1	1	1	1	1	1	1	1	0	1	1	1	1	1	1	1	1	1	0	0	1	1	Q02799	Q7RWD0	A2QY25	g7445.t1
Oxidoreductase, molybdopterin-binding domain	IPR000572_PF00174	Cluster_2	0	0	0	0	0	0	1	1	0	1	0	1	1	1	1	1	1	1	1	1	2	1	2	2	0	0	1		Q7S3C2		g10.t1,g1321.t1
Aconitase A/isopropylmalate dehydratase small subunit, swivel	IPR000573_PF00694	Cluster_2	1	1	1	1	1	1	1	1	1	1	1	1	1	1	1	1	2	2	1	3	1	1	1	1	1	1	1	P49367	Q870W1	A2R4G6	g5246.t1
Aconitase A/isopropylmalate dehydratase small subunit, swivel	IPR000573_PF00694	Cluster_3	2	1	1	1	1	1	1	1	1	1	1	1	1	1	1	1	1	1	1	1	1	1	1	1	1	1	1	P07264	Q7RZ87	A2QCE1	g5312.t1
Acyl-CoA-binding protein, ACBP	IPR000582_PF00887	Cluster_1	0	1	1	1	0	1	0	1	1	1	1	1	1	1	1	1	1	1	1	1	1	1	1	0	0	0	1		Q7RUZ9	A2QR64	g4250.t1
Acyl-CoA-binding protein, ACBP	IPR000582_PF00887	Cluster_2	0	0	0	0	0	0	1	0	1	0	0	0	1	1	1	1	0	0	1	1	1	1	1	0	0	0	1		Q7S9W0	A2QG43	g4193.t1
Class II glutamine amidotransferase domain	IPR000583_PF00310	Cluster_1	2	1	1	1	1	1	1	2	2	1	1	1	1	1	1	1	1	1	1	0	1	1	1	1	1	1	1	P14742	Q7S0B7	A2QH83,Q5YBF4	g5630.t1
Class II glutamine amidotransferase domain	IPR000583_PF00310	Cluster_3	2	1	1	1	1	1	1	1	1	1	1	1	1	1	1	1	1	1	1	1	1	1	1	1	1	2	1	Q12680	Q9P540	A2QPM1	g13359.t1
Creatinase	IPR000587_PF01321	Cluster_1	2	2	2	2	1	1	0	1	1	1	1	1	1	1	1	1	1	1	1	1	1	1	1	2	2	1	1	Q07825	Q7RYL6	A2QGR5	g16092.t1
Ribosomal protein S15	IPR000589_PF00312	Cluster_1	3	1	1	1	1	1	1	1	1	1	1	1	1	1	1	1	1	1	1	1	1	1	1	1	1	1	1	P05756	Q7SDH0	A2QMQ6	g8298.t1
Ribosomal protein S15	IPR000589_PF00312	Cluster_2	0	0	0	0	0	0	0	1	1	1	1	1	1	1	1	1	1	1	1	1	1	1	1	0	0	0	1		Q8X067	A2QE31	g6254.t1
DEP domain	IPR000591_PF00610	Cluster_1	4	1	1	1	2	1	1	1	1	1	1	1	1	1	1	1	1	1	1	1	1	1	1	0	0	2	1	P53046,P51862	Q7SHY5	A2QNB9	g9743.t1
DEP domain	IPR000591_PF00610	Cluster_2	1	1	1	1	1	1	1	1	0	1	1	1	1	1	1	1	1	1	1	1	1	1	1	1	1	1	1	P47170	Q7S9J6		g11897.t1
DEP domain	IPR000591_PF00610	Cluster_3	0	1	1	1	1	2	1	1	1	1	1	1	1	1	1	1	1	1	1	1	1	1	1	1	0	0	1	P43556	Q7S2C4	A2R1D7	g11206.t1
DEP domain	IPR000591_PF00610	Cluster_4	0	0	0	0	0	0	1	1	1	1	1	1	1	1	1	1	1	1	2	2	1	1	1	1	1	1	1		Q7SA69	A2QCD2	g181.t1
Ribosomal protein S27e	IPR000592_PF01667	Cluster_1	1	2	2	2	2	0	1	0	1	1	1	1	1	1	1	1	1	1	1	1	1	1	1	2	1	2	1	P35997,P38711	Q7RVN2	A2QXP2	g4908.t1
RasGAP protein, C-terminal	IPR000593_PF03836	Cluster_1	3	1	1	1	1	1	1	1	1	1	1	1	1	1	1	1	1	1	1	1	1	1	1	1	1	1	1	Q12280	Q7SFX8	A2QP50	g5690.t1
RasGAP protein, C-terminal	IPR000593_PF03836	Cluster_2	4	0	0	0	0	0	1	1	1	1	1	1	1	1	1	1	1	1	1	1	1	1	1	1	1	1	1		Q7S5G6	A2R7H8	g11468.t1
UBA/THIF-type NAD/FAD binding fold	IPR000594_PF00899	Cluster_1	1	1	1	1	1	1	1	1	1	1	1	1	1	1	1	1	1	1	1	1	1	1	1	1	1	3	1	Q99344	Q7SHT1	A2QD12	g558.t1
UBA/THIF-type NAD/FAD binding fold	IPR000594_PF00899	Cluster_2	1	1	1	1	1	1	1	1	1	1	1	1	1	1	1	1	1	1	1	1	1	1	1	1	1	2	1	P38820	Q7SEE2	A2R3H4	g2563.t1
UBA/THIF-type NAD/FAD binding fold	IPR000594_PF00899	Cluster_3	1	1	1	1	2	1	1	1	1	1	1	1	1	1	1	1	1	1	1	1	1	0	1	1	1	1	1	P38756,P36101	Q7SI46	A2QGF7	g12707.t1
UBA/THIF-type NAD/FAD binding fold	IPR000594_PF00899	Cluster_4	1	1	1	1	1	1	1	1	1	1	1	1	1	1	1	1	1	1	1	1	1	1	1	1	1	1	1	P22515	Q7RWR0	A2R5Y8	g7807.t1
UBA/THIF-type NAD/FAD binding fold	IPR000594_PF00899	Cluster_5	1	1	1	1	1	1	1	1	1	1	1	1	1	1	1	1	1	1	1	1	1	1	1	1	1	1	1	P52488	Q9P3F0	A2QVB1	g2931.t1
UBA/THIF-type NAD/FAD binding fold	IPR000594_PF00899	Cluster_6	1	1	1	1	1	1	1	1	0	1	1	1	1	1	1	1	1	1	1	1	1	1	1	1	1	1	1	P38862	Q871U2		g7427.t1
UBA/THIF-type NAD/FAD binding fold	IPR000594_PF00899	Cluster_7	0	1	1	1	1	1	1	1	1	1	1	1	1	1	1	1	1	1	1	1	1	1	1	1	0	0	1	Q06624	Q7S2W4	A2R9K4	g12353.t1
UBA/THIF-type NAD/FAD binding fold	IPR000594_PF00899	Cluster_8	0	1	1	1	0	1	1	1	1	1	1	1	1	1	1	1	0	0	1	1	1	1	1	0	0	0	1		Q7SAK1	A5ABI1	g15477.t1
Cyclic nucleotide-binding domain	IPR000595_PF00027	Cluster_1	6	1	1	1	1	1	1	1	2	1	1	1	1	1	1	1	1	1	1	1	1	0	1	1	1	1	1	P07278	Q01386	A2R984,A2R7J4	g1466.t1
Cyclic nucleotide-binding domain	IPR000595_PF00027	Cluster_2	1	1	1	1	1	1	1	1	1	1	1	1	1	1	1	1	1	1	2	1	1	1	1	1	1	1	1	Q04958	Q7S8J1	A2R350	g1856.t1
Cyclic nucleotide-binding domain	IPR000595_PF00027	Cluster_3	1	0	0	0	1	1	1	1	1	1	1	1	1	1	1	1	1	1	1	1	1	1	1	1	1	1	1	P53273	Q7SDH8	A2Q9H2	g5910.t1
Cyclic nucleotide-binding domain	IPR000595_PF00027	Cluster_4	1	1	1	1	0	1	1	1	1	1	1	1	1	1	1	1	1	1	1	1	1	1	1	0	0	0	1		Q7SFH9	A5AAW1	g3890.t1
Ribosomal protein L3	IPR000597_PF00297	Cluster_1	4	1	1	1	1	1	1	1	1	1	1	1	1	1	1	1	1	1	1	1	1	1	1	1	1	1	1	P14126	P59671	A2QCL1	g994.t1
Ribosomal protein L3	IPR000597_PF00297	Cluster_2	1	1	1	1	1	1	1	1	1	1	1	1	1	1	1	1	0	1	1	1	1	1	1	1	1	1	1	P31334	Q873B3	A2QHK6	g2328.t1
Glycoside hydrolase family 38, N-terminal domain	IPR000602_PF01074	Cluster_1	2	1	1	1	1	1	1	1	1	1	1	1	1	2	1	1	1	1	1	1	2	2	1	1	2	1	1	P22855	Q7S1L0	A2QEN9	g12524.t1
Ubiquitin-conjugating enzyme, E2	IPR000608_PF00179	Cluster_1	0	0	0	0	0	0	1	1	1	1	1	1	1	1	1	1	1	1	1	1	1	1	1	0	0	0	1		Q7SH41	A2R588	g2175.t1
Ubiquitin-conjugating enzyme, E2	IPR000608_PF00179	Cluster_2	0	0	0	0	0	0	1	1	1	1	1	1	1	1	1	1	1	0	1	1	1	1	1	0	0	0	1		Q7S6X1	A2R2C2	g12008.t1
Ubiquitin-conjugating enzyme, E2	IPR000608_PF00179	Cluster_3	0	0	0	0	0	0	1	1	1	1	1	1	0	1	1	1	0	0	1	1	1	1	0	0	0	0	1			A2Q7K3
Ubiquitin-conjugating enzyme, E2	IPR000608_PF00179	Cluster_4	0	0	0	0	0	0	1	1	0	1	0	1	1	1	1	1	0	0	1	1	1	1	1	0	0	0	1		Q8X0I8		g11162.t1
Ubiquitin-conjugating enzyme, E2	IPR000608_PF00179	Cluster_6	0	0	0	0	0	0	0	0	0	0	0	0	1	1	1	1	1	1	1	1	1	1	1	0	0	0	1		Q7S7C4		g3278.t1
Ubiquitin-conjugating enzyme, E2	IPR000608_PF00179	Cluster_7	0	0	0	0	0	0	0	0	0	0	0	0	0	1	1	1	1	1	1	1	1	1	1	0	0	0	1				g8143.t1
Ubiquitin-conjugating enzyme, E2	IPR000608_PF00179	Cluster_8	0	0	0	0	0	0	0	0	0	0	0	0	1	1	0	1	1	1	1	1	1	1	1	0	0	0	1		Q9P725		g14554.t1
Ubiquitin-conjugating enzyme, E2	IPR000608_PF00179	Cluster_9	0	0	0	0	0	0	0	0	0	0	0	0	0	1	1	1	1	1	1	1	1	1	0	0	0	0	1
Proteolipid membrane potential modulator	IPR000612_PF01679	Cluster_1	0	1	1	1	0	1	1	1	1	1	1	1	1	1	1	1	1	1	1	1	1	1	1	0	0	0	1		Q7SAB4	A2R3F4	g4217.t1
Proteolipid membrane potential modulator	IPR000612_PF01679	Cluster_3	0	0	0	0	0	0	0	0	0	0	1	1	1	1	1	1	1	1	1	1	1	1	1	0	0	0	1		Q7S7N1		g1614.t1
Drug/metabolite transporter	IPR000620_PF00892	Cluster_4	0	0	0	1	0	1	1	1	1	1	1	1	0	1	0	1	1	1	1	1	0	0	1	0	0	0	1			A2QRL1	g224.t1
Shikimate kinase/Threonine synthase-like 1	IPR000623_PF01202	Cluster_1	0	1	0	0	0	0	1	3	3	2	2	2	2	1	1	1	1	1	2	2	1	1	1	0	0	0	1		P11637,Q7RW62	A2QHG6,A2QQV9,A2QJS2	g1093.t1
Shikimate kinase/Threonine synthase-like 1	IPR000623_PF01202	Cluster_2	1	1	1	0	0	1	0	1	1	0	1	0	0	0	1	0	1	1	2	1	1	1	1	0	0	0	1			A2Q9B5	g11661.t1
Shikimate kinase/Threonine synthase-like 1	IPR000623_PF01202	Cluster_3	1	1	1	1	1	1	1	1	1	0	1	1	1	1	1	1	1	1	1	1	1	1	1	1	1	3	1	P08566	Q8X071	A2QRQ0	g13204.t1
Ubiquitin domain	IPR000626_PF00240	Cluster_2	1	1	1	1	1	1	0	1	1	1	1	1	1	1	1	1	1	1	1	1	1	1	1	1	1	1	1	P48510	Q7SGY8	A5AB45	g10230.t1
Ubiquitin domain	IPR000626_PF00240	Cluster_3	1	1	0	1	1	1	1	1	0	1	1	1	1	1	0	1	1	1	1	1	1	1	1	1	1	2	1	P32628	Q7S306		g2077.t1
Ubiquitin domain	IPR000626_PF00240	Cluster_4	1	1	1	1	0	1	1	1	1	1	1	1	1	1	1	1	1	1	1	1	1	1	1	1	1	0	1		Q7SH87	A2R0E9	g15977.t1
Ubiquitin domain	IPR000626_PF00240	Cluster_6	1	0	0	0	0	0	0	0	1	1	1	1	1	1	1	1	1	1	1	1	1	1	1	1	0	1	1		Q7SEN5	A2QKN1	g548.t1
Ubiquitin domain	IPR000626_PF00240	Cluster_9	0	0	0	0	0	0	0	0	1	0	1	1	1	0	1	1	1	1	0	1	0	0	0	0	0	0	1		Q8X065	A2R048
Ribosomal protein S8	IPR000630_PF00410	Cluster_1	3	1	2	2	2	2	1	1	1	1	1	1	1	1	1	1	1	1	2	2	1	1	1	1	1	2	1	P0C0W1,Q3E7Y3	Q7RV75	A2QB69	g2005.t1
Ribosomal protein S8	IPR000630_PF00410	Cluster_2	0	0	0	0	0	0	0	1	1	1	1	1	1	1	1	1	1	1	1	1	1	1	1	0	0	0	1		Q7SHF3	A2QPD5	g14669.t1
YjeF C-terminal domain, carbohydrate kinase-related	IPR000631_PF01256	Cluster_1	1	1	1	1	1	1	1	1	1	1	1	1	1	1	1	1	1	1	1	1	1	1	1	1	1	2	1	P36059	Q7SHU9	A2R7V7	g574.t1
Translation elongation factor EFG, V domain	IPR000640_PF00679	Cluster_2	1	1	1	1	1	1	1	1	1	1	1	1	1	1	1	1	1	1	1	1	1	1	1	1	1	1	1	P25039	Q7SH14	A2QI77	g14664.t1
Translation elongation factor EFG, V domain	IPR000640_PF00679	Cluster_3	1	1	1	1	1	1	1	1	1	1	1	1	1	1	1	1	1	1	1	1	1	1	1	1	1	1	1	P46943	Q7S0P6	A2QU25	g4721.t1
Translation elongation factor EFG, V domain	IPR000640_PF00679	Cluster_4	1	1	1	1	1	1	1	1	1	1	1	1	1	1	1	1	1	1	1	1	1	0	1	1	1	1	1	P53893	Q7SB63	A2R3P3	g7654.t1
Translation elongation factor EFG, V domain	IPR000640_PF00679	Cluster_5	1	1	1	1	1	1	1	1	1	1	1	1	0	0	1	1	1	1	1	1	1	1	1	1	1	0	1	P39677		A2R994	g6432.t1
CBS domain	IPR000644_PF00571	Cluster_1	1	1	1	2	1	2	1	0	1	1	0	2	1	1	2	1	2	2	2	1	1	1	1	1	1	1	1	P37020	Q7S9P2	A2R3F0	g1863.t1
CBS domain	IPR000644_PF00571	Cluster_2	6	1	1	1	0	1	1	1	1	1	1	1	0	1	1	1	1	1	1	1	1	1	1	1	1	1	1			A2RB81	g14805.t1
CBS domain	IPR000644_PF00571	Cluster_3	3	1	1	1	1	1	1	1	1	1	1	1	1	1	1	1	1	1	1	1	1	1	1	1	1	1	1	P12904	Q7RXW0	A2R415	g11449.t1
CBS domain	IPR000644_PF00571	Cluster_4	2	1	1	0	3	1	1	1	1	0	2	1	1	1	1	1	1	1	1	1	1	1	1	1	0	1	1	P38697,P50095,P50094	Q7SFX7	A2QP46	g5702.t1
CBS domain	IPR000644_PF00571	Cluster_5	2	2	2	1	1	1	1	0	1	1	1	1	1	1	1	1	1	1	1	1	1	0	1	1	1	0	1	P32582	Q7S3M7	A2QKG7	g2085.t1
CBS domain	IPR000644_PF00571	Cluster_6	2	1	1	1	2	1	1	1	1	1	1	1	1	1	1	1	1	1	1	1	1	1	1	0	0	0	1	P38314,P53172	Q7S4W8	A2RB71	g10009.t1
Oxysterol-binding protein	IPR000648_PF01237	Cluster_1	0	1	1	1	2	1	1	1	1	1	1	1	1	1	1	1	1	1	1	1	1	1	1	1	1	1	1	P35845,Q12451	Q7SI71	A2QY62	g12609.t1
Oxysterol-binding protein	IPR000648_PF01237	Cluster_2	0	1	1	1	2	1	1	1	1	1	1	1	1	1	1	1	1	1	1	1	1	1	1	0	0	0	1	Q02201,P38755	Q7RW03	A2QP63	g12508.t1
Oxysterol-binding protein	IPR000648_PF01237	Cluster_3	0	0	0	0	1	0	1	1	1	1	1	1	1	1	1	1	1	1	1	1	1	1	1	0	0	0	1	P38713	Q8NIV7	A2QXZ0	g7408.t1
Oxysterol-binding protein	IPR000648_PF01237	Cluster_4	0	0	0	0	0	0	1	1	1	1	1	1	1	1	1	1	1	1	1	1	1	1	1	0	0	0	1		Q7S021	A2QDL9	g13494.t1
Oxysterol-binding protein	IPR000648_PF01237	Cluster_5	0	0	0	0	0	0	1	1	1	1	1	1	0	1	1	1	1	1	1	1	1	1	1	0	0	0	1			A2QY30	g11476.t1
Initiation factor 2B-related	IPR000649_PF01008	Cluster_2	1	1	1	1	1	1	1	1	0	1	1	1	1	1	1	1	1	1	1	1	1	1	3	1	0	1	1	Q06489	Q7S4G7		g3123.t1,g12585.t1,g15953.t1
Initiation factor 2B-related	IPR000649_PF01008	Cluster_3	0	0	0	0	0	0	1	2	1	1	1	1	0	1	1	1	1	1	1	1	1	1	1	0	0	0	1			A2QBR5	g8053.t1
Ras-like guanine nucleotide exchange factor, N-terminal	IPR000651_PF00618	Cluster_2	4	0	0	1	1	1	1	1	1	1	1	1	1	1	1	1	1	1	1	1	1	1	1	0	0	0	1	P07866	Q7RX13	A2QDU9	g13346.t1
Ras-like guanine nucleotide exchange factor, N-terminal	IPR000651_PF00618	Cluster_3	1	0	0	0	0	0	0	1	1	1	1	1	1	1	1	1	1	1	1	1	1	1	1	1	1	1	1		Q7RYJ8	A2Q880	g6489.t1
Triosephosphate isomerase	IPR000652_PF00121	Cluster_1	1	1	1	1	1	1	1	1	1	1	1	1	1	1	1	1	1	1	1	1	1	1	1	1	1	1	1	P00942	Q7S2Z9	A2R3N5	g15474.t1
Triosephosphate isomerase	IPR000652_PF00121	Cluster_2	0	0	0	0	0	1	1	1	1	1	1	1	1	1	1	1	1	0	0	1	1	1	1	0	1	0	1		Q7RZ74	A2QCB2	g12248.t1
Aldehyde oxidase/xanthine dehydrogenase, a/b hammerhead	IPR000674_PF01315	Cluster_1	0	0	0	1	0	0	1	1	2	2	1	2	1	1	1	1	1	1	1	2	1	1	1	0	1	0	1		Q7RXE4	A2QG16,A2QJ12	g758.t1
Cutinase	IPR000675_PF01083	Cluster_2	0	0	0	0	0	0	0	0	0	0	1	1	2	1	2	3	0	0	1	1	1	2	2	0	0	0	1		Q7S259,Q872L7		g11019.t1,g12993.t1
Zinc finger, GATA-type	IPR000679_PF00320	Cluster_1	1	1	1	1	0	1	1	1	1	1	1	1	1	1	1	1	1	1	1	1	1	1	1	1	1	0	1		O74262	A2Q7Y4	g6432.t1
Zinc finger, GATA-type	IPR000679_PF00320	Cluster_2	1	0	0	0	0	2	1	1	1	1	1	1	1	1	1	1	1	1	1	2	1	1	1	0	1	0	1		P19212	A2R0K9	g4099.t1
Zinc finger, GATA-type	IPR000679_PF00320	Cluster_3	0	1	1	1	0	1	1	1	1	1	1	1	1	1	1	1	1	1	0	1	1	1	1	0	0	0	1		Q9HEV5	A2QC45	g8566.t1
Zinc finger, GATA-type	IPR000679_PF00320	Cluster_4	2	0	0	0	0	0	0	1	1	1	1	1	1	1	1	1	0	1	1	1	1	1	1	0	0	0	1		Q01371	A2QY00	g10006.t1
Zinc finger, GATA-type	IPR000679_PF00320	Cluster_5	0	0	0	0	0	1	0	1	1	1	1	1	1	1	1	1	0	0	1	1	1	1	0	0	1	1	1		P78714	A2Q9K7
Zinc finger, GATA-type	IPR000679_PF00320	Cluster_6	0	0	0	0	0	0	0	1	1	1	1	1	1	1	1	1	1	1	0	2	1	0	1	0	0	0	1		Q8X0W7	A2QE69	g15306.t1
Protein-L-isoaspartate(D-aspartate) O-methyltransferase	IPR000682_PF01135	Cluster_2	1	0	0	0	0	0	1	1	1	1	1	1	1	1	1	1	1	1	1	1	1	1	1	1	1	1	1		Q7RWK6	A2QY44	g7453.t1
Oxidoreductase, N-terminal	IPR000683_PF01408	Cluster_2	0	0	0	0	0	0	1	3	2	1	1	1	1	1	1	1	1	1	1	2	1	2	1	0	0	0	1		Q9P514	A2R6J2,A2QPN8	g5863.t1
Oxidoreductase, N-terminal	IPR000683_PF01408	Cluster_3	0	0	0	0	0	0	1	1	1	1	1	1	1	1	1	1	1	1	2	1	1	1	1	1	1	0	1		Q7SCJ8	A2QDM8	g4748.t1
Oxidoreductase, N-terminal	IPR000683_PF01408	Cluster_4	0	0	0	0	0	0	0	1	1	0	0	1	1	1	2	3	2	1	1	1	2	0	1	0	0	0	1		Q7S6E4	A2R113	g4526.t1
Oxidoreductase, N-terminal	IPR000683_PF01408	Cluster_5	0	0	0	0	0	0	0	1	1	1	1	1	1	1	1	1	1	1	1	1	1	1	0	1	1	0	1		Q7S061	A2QDN3
Oxidoreductase, N-terminal	IPR000683_PF01408	Cluster_6	0	0	0	0	0	0	0	1	1	1	1	1	0	1	1	1	1	0	1	3	1	1	1	0	0	0	1			A2R661	g3130.t1
Oxidoreductase, N-terminal	IPR000683_PF01408	Cluster_7	1	0	0	0	0	0	0	1	1	1	1	0	1	1	1	1	0	0	1	2	1	1	1	0	0	0	1		Q7S754	A2R958	g15812.t1
Fibrillarin	IPR000692_PF01269	Cluster_1	4	1	1	1	1	1	1	1	1	1	1	1	1	1	1	1	1	1	1	1	1	1	1	1	1	1	1	P15646	Q9HE26	A2QAP1	g7586.t1
WH1/EVH1	IPR000697_PF00568	Cluster_1	1	1	1	1	1	1	1	1	1	1	1	1	1	1	1	1	1	1	1	1	1	1	1	1	1	2	1	Q12446	Q7SF15	A2R0A5	g4923.t1
Casein kinase II, regulatory subunit	IPR000704_PF01214	Cluster_1	2	1	2	1	1	1	1	1	1	1	1	1	1	1	1	1	1	1	1	1	1	1	1	1	1	1	1	P38930	Q8TG11	A2QQA0	g6648.t1
Casein kinase II, regulatory subunit	IPR000704_PF01214	Cluster_2	0	1	1	1	1	1	1	1	1	1	1	1	1	1	1	1	1	1	1	1	1	1	1	1	1	1	1	P43639	Q8TG12	A2QHN5	g1419.t1
Glycosyl transferase, family 4	IPR000715_PF00953	Cluster_1	0	1	1	1	1	1	1	1	1	1	1	1	1	1	1	1	1	1	1	1	1	0	1	1	1	1	1	P07286	Q7RZ95	Q8TGX0	g5292.t1
Proteasome component (PCI) domain	IPR000717_PF01399	Cluster_1	2	1	1	1	1	1	1	1	1	1	1	1	1	1	1	1	1	1	1	1	1	1	1	1	1	1	1	Q06103	Q7RZ97	Q3MU67	g13642.t1
Proteasome component (PCI) domain	IPR000717_PF01399	Cluster_2	2	1	1	1	1	1	1	1	1	1	1	1	1	1	1	1	1	1	1	1	1	1	1	1	1	1	1	P40016	Q7S4G9	A5ABT6	g1976.t1
Proteasome component (PCI) domain	IPR000717_PF01399	Cluster_3	2	1	1	1	1	1	0	1	1	1	1	1	1	1	1	1	1	1	1	1	1	1	1	1	1	1	1	Q04062	Q7S4V3	Q3MSU5	g10022.t1
Proteasome component (PCI) domain	IPR000717_PF01399	Cluster_4	1	1	1	1	1	1	1	1	1	1	1	1	1	1	1	1	1	1	1	1	1	1	1	1	1	1	1	Q12377	Q96U28	A2RB09	g5860.t1
Proteasome component (PCI) domain	IPR000717_PF01399	Cluster_5	1	1	1	1	1	1	1	1	1	1	1	1	1	1	1	1	1	1	1	1	1	1	1	1	1	1	1	Q12250	Q7SH78	A2QXP4	g10819.t1
Proteasome component (PCI) domain	IPR000717_PF01399	Cluster_6	2	0	0	1	0	1	1	1	1	1	1	1	1	1	1	1	1	1	1	1	1	1	1	1	1	2	1		Q7S519	A5AAA4	g3680.t1
Proteasome component (PCI) domain	IPR000717_PF01399	Cluster_7	1	1	1	1	1	1	1	1	1	1	1	1	1	1	1	1	1	1	1	1	1	1	1	1	1	0	1	P32497	Q7SBD4	A2R2K2	g15466.t1
Proteasome component (PCI) domain	IPR000717_PF01399	Cluster_8	1	1	1	1	0	1	1	1	1	1	1	1	1	1	1	1	1	1	1	1	1	1	1	1	1	0	1		Q7RWT1	A2Q8I1	g6044.t1
Proteasome component (PCI) domain	IPR000717_PF01399	Cluster_9	1	1	1	1	1	1	1	0	1	1	0	1	0	1	1	1	1	0	1	1	1	1	1	1	2	1	1	P47130		A2Q8A0	g1741.t1
Proteasome component (PCI) domain	IPR000717_PF01399	Cluster_10	1	1	0	1	0	1	1	1	1	1	1	1	1	1	0	1	1	1	1	1	1	1	1	1	1	1	1		Q7SI58	A2QXN6	g9151.t1
Proteasome component (PCI) domain	IPR000717_PF01399	Cluster_11	1	0	0	0	0	1	1	1	1	1	1	1	1	1	1	1	1	1	1	1	1	1	1	1	1	1	1		Q7SEK1	A2R194	g6768.t1
Proteasome component (PCI) domain	IPR000717_PF01399	Cluster_12	1	0	0	0	0	1	1	1	1	1	1	1	1	1	1	1	1	1	1	1	1	1	1	1	1	0	1		Q7RXQ1	A2R8Q0	g2069.t1
Proteasome component (PCI) domain	IPR000717_PF01399	Cluster_13	0	0	0	0	0	1	1	1	1	1	1	1	1	1	1	1	1	1	1	1	1	1	1	1	1	1	1		Q7S0P8	A2R8H9	g14218.t1
Proteasome component (PCI) domain	IPR000717_PF01399	Cluster_14	1	0	0	0	0	0	1	1	1	1	1	1	0	1	1	1	1	1	1	1	1	0	0	1	1	0	1			A2Q9J8
Protein kinase domain	IPR000719_PF00069	Cluster_13	1	2	2	2	3	0	1	1	1	1	1	1	1	1	1	1	1	1	1	1	1	1	1	1	1	1	1	P38080,P53974,P40494	Q7SBC1	A2RAM3	g4772.t1
Protein kinase domain	IPR000719_PF00069	Cluster_15	2	1	1	1	1	1	1	1	1	1	1	1	1	1	1	1	1	1	1	1	1	1	1	1	1	2	1	Q12003	Q7S1L5	A2R8S4	g12520.t1
Protein kinase domain	IPR000719_PF00069	Cluster_16	2	1	1	1	1	1	1	1	1	1	1	1	1	1	1	1	1	1	1	1	1	1	1	1	1	1	1	P15442	O74297	A2R9C3	g11863.t1
Protein kinase domain	IPR000719_PF00069	Cluster_17	2	1	1	1	1	1	1	1	1	1	1	1	1	1	1	1	1	1	1	1	1	1	1	1	1	1	1	P06243	Q7S1I3	A2QY28	g7464.t1
Protein kinase domain	IPR000719_PF00069	Cluster_18	1	1	1	1	1	1	1	1	1	1	1	1	1	1	1	1	1	1	1	1	1	1	1	1	1	1	1	P54199	Q7SGE4	A2QEM4	g14739.t1
Protein kinase domain	IPR000719_PF00069	Cluster_19	1	1	1	1	1	1	1	1	1	1	1	1	1	1	1	1	1	1	1	1	1	1	1	0	1	1	1	P32944	Q871F2	A2QKH9	g6172.t1
Protein kinase domain	IPR000719_PF00069	Cluster_20	2	1	1	1	1	1	1	1	1	1	1	1	1	1	1	1	1	1	1	1	1	1	1	1	1	0	1	P22219	Q7S9P0	A2QRX5	g7778.t1
Protein kinase domain	IPR000719_PF00069	Cluster_21	1	1	1	1	1	1	1	1	1	1	1	1	1	1	1	1	1	1	1	1	1	1	1	1	1	1	1	P41695	Q7S089	A2QVN0	g8698.t1
Protein kinase domain	IPR000719_PF00069	Cluster_22	1	1	1	1	1	1	1	1	1	1	1	1	1	1	1	1	1	1	1	1	1	1	1	0	1	1	1	P47042	Q7S4B6	A2QIJ8	g2742.t1
Protein kinase domain	IPR000719_PF00069	Cluster_23	1	1	1	1	1	0	1	1	1	1	1	1	1	1	1	1	1	1	1	1	1	1	1	1	1	1	1	P32361	Q7S470	A2Q941	g3108.t1
Protein kinase domain	IPR000719_PF00069	Cluster_24	1	1	1	1	0	1	0	0	1	0	0	0	0	1	1	1	0	1	1	1	0	0	0	0	1	0	1			A2QU23
Protein kinase domain	IPR000719_PF00069	Cluster_25	1	1	1	1	1	1	1	1	1	1	1	1	1	1	1	1	1	1	1	0	1	1	1	1	1	1	1	P53009	Q7S698	A2QHM7	g5215.t1
Protein kinase domain	IPR000719_PF00069	Cluster_26	0	1	1	0	0	0	1	1	1	1	1	1	1	1	1	1	1	1	1	1	1	1	1	0	1	1	1		Q9P3E9	A2RB95	g1055.t1
Protein kinase domain	IPR000719_PF00069	Cluster_27	4	0	1	0	0	0	1	1	1	1	1	1	1	1	1	1	1	1	1	1	1	1	1	0	0	0	1		Q7RWB9	A2QDW3	g2351.t1
Protein kinase domain	IPR000719_PF00069	Cluster_29	0	0	0	0	0	0	2	0	1	1	0	0	1	1	1	1	1	1	1	1	1	0	1	0	1	0	1		Q7S8C5	A2QCJ0	g345.t1
Protein kinase domain	IPR000719_PF00069	Cluster_30	1	0	0	0	0	0	1	1	1	1	1	1	1	0	1	1	0	1	1	1	1	1	0	0	1	0	1		Q7RVT8	A2QQ43
Protein kinase domain	IPR000719_PF00069	Cluster_37	0	0	0	0	0	0	0	0	0	1	0	0	0	1	1	2	1	1	2	1	0	1	1	0	0	0	1				g3763.t1
Protein kinase domain	IPR000719_PF00069	Cluster_42	0	0	0	0	0	0	0	0	0	0	0	2	1	1	1	1	0	0	1	1	1	1	1	0	0	0	1		Q7S6M3		g14822.t1
Protein kinase domain	IPR000719_PF00069	Cluster_44	0	0	0	0	0	0	0	0	0	0	0	0	0	0	1	3	0	0	1	1	1	1	1	0	0	0	1				g14105.t1
Target SNARE coiled-coil domain	IPR000727_PF05739	Cluster_2	1	2	2	2	2	2	1	1	1	1	1	1	1	1	1	1	1	1	1	1	1	1	1	0	1	1	1	P32854,Q12241	Q8X090	A5AAK5	g4437.t1
Target SNARE coiled-coil domain	IPR000727_PF05739	Cluster_3	1	1	1	1	1	1	1	1	1	1	1	1	1	1	1	1	1	1	1	1	1	1	1	1	1	1	1	Q01590	Q7SH99	A2QF18	g10758.t1
Target SNARE coiled-coil domain	IPR000727_PF05739	Cluster_4	1	1	1	1	1	1	1	1	1	1	1	1	1	1	1	1	1	1	1	1	1	1	1	0	1	1	1	Q08144	Q8NIV9	A2QJG7	g7575.t1
Target SNARE coiled-coil domain	IPR000727_PF05739	Cluster_5	1	1	1	1	1	1	1	1	1	1	1	1	1	1	1	1	1	1	1	1	1	1	1	1	1	0	1	P31377	Q9P5Y3	A2R5Z7	g15685.t1
Target SNARE coiled-coil domain	IPR000727_PF05739	Cluster_6	0	1	1	1	1	1	0	1	1	1	1	1	1	1	1	1	1	1	1	1	1	1	1	0	1	0	1	Q03322	Q7S7Z7	A2QUA0	g15665.t1
Target SNARE coiled-coil domain	IPR000727_PF05739	Cluster_7	1	1	1	1	1	1	0	0	0	0	0	1	1	1	1	1	1	1	1	1	1	1	1	1	1	1	1	P32912	Q7RZW9		g4073.t1
Target SNARE coiled-coil domain	IPR000727_PF05739	Cluster_8	0	0	0	1	1	1	1	0	0	0	0	1	1	1	1	1	1	0	1	1	1	0	1	0	0	1	1	P22804	Q9P535		g12026.t1
AIR synthase related protein, N-terminal domain	IPR000728_PF00586	Cluster_1	1	1	1	1	1	1	1	1	1	1	1	1	1	1	1	1	1	1	1	1	1	1	1	1	1	1	1	P38972	Q7S8V0	A2QEA3	g4371.t1
AIR synthase related protein, N-terminal domain	IPR000728_PF00586	Cluster_2	1	1	1	1	1	1	1	1	1	1	1	1	1	1	1	1	1	1	1	1	1	1	1	1	1	1	1	P07244	Q7RXB0	A2R4I8	g11118.t1
GrpE nucleotide exchange factor	IPR000740_PF01025	Cluster_1	0	1	1	1	1	1	1	1	1	1	1	1	1	1	1	1	1	1	1	1	1	1	1	0	0	0	1	P38523	Q9P5U4	A2QBZ6	g5828.t1
Glycoside hydrolase, family 28	IPR000743_PF00295	Cluster_2	0	0	0	0	0	0	0	2	3	3	2	1	1	1	1	1	0	0	3	4	2	7	1	1	0	0	1		Q7SAI8	Q27UB1,Q27UB2,Q27UB3	g10307.t1
Ribosomal protein S9	IPR000754_PF00380	Cluster_1	5	1	1	1	1	1	1	1	1	1	1	1	1	1	1	1	1	1	1	1	1	1	1	1	1	1	1	P40213	Q7SFJ9	A2QD71	g9411.t1
Ribosomal protein S9	IPR000754_PF00380	Cluster_2	1	1	1	1	1	1	1	1	1	1	1	1	1	1	1	1	1	1	1	1	1	1	1	0	1	1	1	P38120	Q7S7R6	A2R4K9	g6794.t1
Glycoside hydrolase, family 16	IPR000757_PF00722	Cluster_5	0	1	1	1	2	1	1	1	2	1	1	1	1	1	1	1	1	1	1	1	1	1	1	1	2	0	1	P32623,Q05790	Q7SBQ2	A2QM82,A5AAV4	g4494.t1
Glycoside hydrolase, family 16	IPR000757_PF00722	Cluster_7	1	0	0	0	0	0	1	0	0	0	0	2	1	1	1	1	1	1	1	1	1	0	1	0	1	0	1		Q7RYH1		g12543.t1
Ketose-bisphosphate aldolase, class-II	IPR000771_PF01116	Cluster_1	4	1	1	2	1	1	1	1	1	1	1	1	1	1	1	1	1	1	1	1	1	0	1	1	1	1	1	P14540	P53444	A2QDL0	g14311.t1
Ricin B lectin domain	IPR000772_PF00652	Cluster_2	0	0	0	0	0	0	0	0	0	0	0	0	1	1	1	1	0	0	0	0	1	1	0	0	0	0	1		Q7SBD7
FAS1 domain	IPR000782_PF02469	Cluster_2	0	0	0	0	0	0	1	1	2	1	1	1	1	1	1	1	0	1	2	1	2	1	1	1	1	0	1		Q7SHV9	A2QAQ2,A2R544	g7508.t1
RNA polymerase, subunit H/Rpb5 C-terminal	IPR000783_PF01191	Cluster_1	0	1	1	1	1	1	1	0	1	1	1	1	1	1	1	1	1	1	1	1	1	1	1	1	1	1	1	P20434	Q7S8Z5	A2QAL5	g357.t1
Ribonucleotide reductase large subunit, C-terminal	IPR000788_PF02867	Cluster_1	3	2	2	2	2	2	1	1	1	1	1	1	1	1	1	1	1	1	1	1	1	1	1	1	1	1	1	P21524,P21672	Q9UW15	A2QHU5	g9462.t1
GPR1/FUN34/yaaH	IPR000791_PF01184	Cluster_1	0	0	0	0	0	0	0	0	0	0	0	0	1	0	1	1	1	1	1	2	1	1	2	0	0	0	1		Q7S507		g11621.t1,g15856.t1
ATPase, F1/V1/A1 complex, alpha/beta subunit, C-terminal	IPR000793_PF00306	Cluster_1	4	1	1	1	1	1	1	1	1	1	1	1	1	1	1	1	1	2	1	1	1	1	1	1	1	1	1	P00830	P23704	A2R3G2	g1537.t1
ATPase, F1/V1/A1 complex, alpha/beta subunit, C-terminal	IPR000793_PF00306	Cluster_2	3	1	1	1	1	1	1	1	1	2	1	1	1	1	1	1	1	1	1	1	1	1	1	1	1	2	1	P07251	P37211	A2R8J9	g576.t1
ATPase, F1/V1/A1 complex, alpha/beta subunit, C-terminal	IPR000793_PF00306	Cluster_3	2	1	1	1	1	1	1	1	1	1	1	1	1	1	1	1	1	2	1	1	1	1	1	1	1	1	1	P16140	P11593	A2QC23	g1085.t1
ATPase, F1/V1/A1 complex, alpha/beta subunit, C-terminal	IPR000793_PF00306	Cluster_4	2	1	1	1	1	1	1	1	1	0	1	1	1	1	1	1	1	1	1	1	1	1	1	1	1	1	1	P17255	P11592	A5AAF1	g8756.t1
Elongation factor, GTP-binding domain	IPR000795_PF00009	Cluster_2	5	1	1	1	1	1	1	2	1	1	1	1	1	1	1	1	1	1	1	1	1	1	1	1	1	1	1	P02994	Q01372	A2RAZ0	g9192.t1
Elongation factor, GTP-binding domain	IPR000795_PF00009	Cluster_3	2	1	1	1	1	1	1	1	1	1	1	1	1	1	1	1	1	1	1	1	1	1	1	1	1	2	1	P02992	Q9C2P1	A2QR19	g6149.t1
Elongation factor, GTP-binding domain	IPR000795_PF00009	Cluster_4	1	1	1	1	1	1	1	1	1	1	1	1	1	1	1	1	1	1	1	1	1	1	1	1	1	2	1	P05453	Q7S6P5	A2QWB0	g1425.t1
Elongation factor, GTP-binding domain	IPR000795_PF00009	Cluster_5	2	1	1	1	1	1	1	1	1	1	1	1	1	1	1	1	1	1	1	1	1	1	1	1	1	1	1	P32481	Q7SEK4	A2QI16	g6775.t1
Elongation factor, GTP-binding domain	IPR000795_PF00009	Cluster_7	1	1	1	1	1	1	1	1	1	1	1	1	1	1	1	1	1	1	1	1	1	1	1	1	1	1	1	P53893	Q7SB63	A2R3P3	g7654.t1
Elongation factor, GTP-binding domain	IPR000795_PF00009	Cluster_8	1	1	1	1	1	1	1	1	1	1	1	1	1	1	1	1	1	1	1	1	1	1	1	1	1	1	1	P25039	Q7SH14	A2QI77	g14664.t1
Elongation factor, GTP-binding domain	IPR000795_PF00009	Cluster_9	1	1	1	1	1	1	1	1	1	1	1	1	1	1	1	1	1	1	1	1	1	1	1	1	1	1	1	P46943	Q7S0P6	A2QU25	g4721.t1
Elongation factor, GTP-binding domain	IPR000795_PF00009	Cluster_10	0	1	1	1	1	1	1	1	1	1	1	1	1	1	1	1	1	1	1	1	1	1	1	1	1	1	1	P39730	Q7S829	A2Q827	g9922.t1
Elongation factor, GTP-binding domain	IPR000795_PF00009	Cluster_11	1	1	1	1	1	1	1	1	1	1	1	1	1	1	1	1	1	1	1	1	1	1	1	1	1	0	1	P25038	Q7S5I4	A2RB55	g9664.t1
Elongation factor, GTP-binding domain	IPR000795_PF00009	Cluster_13	1	1	1	1	1	1	1	1	1	1	1	1	1	1	1	1	1	1	1	1	1	1	1	0	0	0	1	P39677	Q7S9B4	A2R994	g6432.t1
Elongation factor, GTP-binding domain	IPR000795_PF00009	Cluster_14	1	0	0	0	0	0	1	1	1	1	1	1	1	1	1	1	1	1	1	1	1	1	1	1	1	1	1		Q7S1Q2	A2R454	g10646.t1
Elongation factor, GTP-binding domain	IPR000795_PF00009	Cluster_15	0	0	0	0	0	0	1	1	1	1	1	1	1	1	1	1	1	1	1	1	1	1	1	0	0	0	1		Q7RXK0	A2QW82	g10461.t1
Elongation factor, GTP-binding domain	IPR000795_PF00009	Cluster_16	0	0	0	0	0	0	1	1	1	1	1	0	1	1	1	1	1	1	1	1	1	1	1	0	0	0	1		Q7SF69	A2QWE7	g5898.t1
Putative esterase	IPR000801_PF00756	Cluster_1	0	1	1	1	1	1	1	1	1	1	1	1	1	1	1	1	1	1	1	1	1	1	1	1	1	0	1	P40363	Q7RXB4	A2QMS0	g8640.t1
Arsenite/antimonite efflux pump membrane protein, ArsB	IPR000802_PF02040	Cluster_1	1	0	0	0	0	0	0	0	0	1	1	1	0	1	1	1	1	1	1	1	2	0	1	1	1	0	1				g14713.t1
Imidazoleglycerol-phosphate dehydratase	IPR000807_PF00475	Cluster_1	0	1	1	1	1	1	0	0	0	0	0	1	1	1	1	1	1	1	1	1	1	1	1	1	1	0	1	P06633	Q9HEG3		g15102.t1
Glycosyl transferase, family 35	IPR000811_PF00343	Cluster_1	2	1	1	1	1	1	1	1	1	1	1	1	1	1	1	1	1	1	1	1	1	1	1	1	0	0	1	P06738	Q7S9A9	A2QRF0	g4169.t1
TATA-box binding protein	IPR000814_PF00352	Cluster_1	0	0	0	0	0	0	1	1	1	1	1	0	1	1	1	1	1	1	1	1	1	1	1	0	0	0	1		Q7RVB4	A2R7L3	g10404.t1
TEA/ATTS	IPR000818_PF01285	Cluster_2	0	0	0	0	0	0	0	0	0	0	0	0	1	0	1	1	1	1	1	1	1	1	1	0	0	0	1		Q7SG08		g10209.t1
GPCR, family 2, secretin-like	IPR000832_PF00002	Cluster_1	0	0	0	0	0	0	0	0	0	0	0	0	1	0	1	1	0	0	0	1	1	1	1	0	0	0	1		Q7SFU4		g15399.t1
Peptidase M14, carboxypeptidase A	IPR000834_PF00246	Cluster_2	0	1	1	1	1	1	1	1	1	1	1	1	1	1	1	1	1	1	1	1	1	1	1	0	0	0	1	P38836	Q871Q3	A2QZA2	g7555.t1
Peptidase M14, carboxypeptidase A	IPR000834_PF00246	Cluster_4	0	0	0	0	0	0	0	0	0	0	0	2	0	3	1	1	1	0	1	1	2	3	1	0	0	0	1				g5793.t1
Phosphoribosyltransferase domain	IPR000836_PF00156	Cluster_2	1	1	1	1	2	1	1	1	1	1	1	1	1	1	1	1	1	1	1	1	1	1	1	1	1	1	1	P49435,P36973	Q7SCM0	A2QY81	g10222.t1
Phosphoribosyltransferase domain	IPR000836_PF00156	Cluster_3	1	1	1	1	2	1	1	1	1	1	1	1	1	1	1	1	1	1	1	1	1	1	1	1	1	1	1	P13298,P30402	Q7RVF7	A2QJU8	g329.t1
Phosphoribosyltransferase domain	IPR000836_PF00156	Cluster_4	1	1	1	1	1	1	1	1	1	1	1	1	1	1	1	2	1	0	1	1	1	0	1	1	1	1	1	P04046	Q7S7H7	A2R4V7	g13319.t1
Phosphoribosyltransferase domain	IPR000836_PF00156	Cluster_5	1	1	1	2	2	1	0	1	1	1	1	1	1	1	1	1	1	1	1	1	1	1	0	1	1	0	1	Q04178,P47165	Q7S721	A2R2C7
Phosphoribosyltransferase domain	IPR000836_PF00156	Cluster_6	0	0	0	0	0	0	0	1	0	0	2	1	0	1	1	2	1	1	1	3	1	0	0	0	0	0	1
Nucleoside phosphorylase domain	IPR000845_PF01048	Cluster_2	2	1	2	2	2	2	1	1	1	2	2	2	1	1	1	1	1	1	1	1	1	1	1	3	2	4	1	Q07938,Q05788	Q7RZA5	A2QWR2	g7351.t1
Alkyl hydroperoxide reductase subunit C/ Thiol specific antioxidant	IPR000866_PF00578	Cluster_1	1	2	1	2	1	2	1	2	2	2	2	2	1	1	1	1	1	1	1	1	1	1	1	2	1	1	1	P34227	Q7S4F4	A2QIF8,A2QX51	g1335.t1
Alkyl hydroperoxide reductase subunit C/ Thiol specific antioxidant	IPR000866_PF00578	Cluster_4	0	0	0	0	0	0	1	1	1	1	1	1	1	1	1	1	1	1	1	1	1	1	1	0	0	0	1		Q871K9	A2QHJ7	g4633.t1
Isochorismatase-like	IPR000868_PF00857	Cluster_1	0	0	0	0	0	0	0	2	1	1	0	1	0	1	1	3	1	2	1	3	1	1	2	7	0	0	1			A2R245	g6890.t1,g12787.t1
Isochorismatase-like	IPR000868_PF00857	Cluster_2	1	1	3	1	1	1	1	1	1	1	1	1	1	1	1	1	1	1	1	0	1	1	1	1	0	0	1	P53184	Q7SET3	A2QP65	g2858.t1
Isochorismatase-like	IPR000868_PF00857	Cluster_3	3	0	0	1	0	0	2	2	2	3	3	2	0	0	1	1	0	0	1	1	1	2	1	0	0	0	1			A2QG48,A2QZ90	g12641.t1
Isochorismatase-like	IPR000868_PF00857	Cluster_4	1	0	0	0	0	0	0	0	1	1	1	1	1	1	1	1	1	1	1	1	1	1	1	1	1	1	1		Q7RXP2	A2QZE6	g2253.t1
Isochorismatase-like	IPR000868_PF00857	Cluster_5	0	0	0	0	0	0	1	0	1	1	1	1	1	1	1	1	1	1	1	1	1	1	1	0	0	0	1		Q7S5N6	A2QTH4	g4692.t1
AMP-dependent synthetase/ligase	IPR000873_PF00501	Cluster_8	1	1	1	1	1	1	1	1	1	1	1	2	1	1	1	1	1	1	1	1	1	1	1	0	0	0	1	Q12275	Q7RZX2	A2QAX9	g5578.t1
AMP-dependent synthetase/ligase	IPR000873_PF00501	Cluster_9	0	0	0	0	0	1	1	1	1	1	1	1	1	1	1	1	1	1	1	1	1	1	1	0	1	0	1		Q8X0Y1	A2QMV4	g4316.t1
AMP-dependent synthetase/ligase	IPR000873_PF00501	Cluster_10	0	0	0	0	0	0	1	0	0	0	1	0	1	0	1	1	1	1	1	1	0	2	1	3	1	0	1		Q7SC49		g16052.t1
Tetrapyrrole methylase	IPR000878_PF00590	Cluster_1	2	1	1	1	1	1	1	1	1	1	1	1	1	1	1	1	1	0	1	1	1	1	1	1	1	0	1	P36150	Q7SI49	A2QXP5	g14089.t1
Tetrapyrrole methylase	IPR000878_PF00590	Cluster_2	1	1	1	1	1	1	0	1	1	1	1	1	1	1	1	1	1	1	1	1	1	0	1	1	1	1	1	P32469	Q7S949	A2QRU1	g1128.t1
Aliphatic acid kinase, short-chain	IPR000890_PF00871	Cluster_1	0	0	0	0	0	0	1	1	1	1	1	1	1	1	1	1	1	1	1	1	1	1	0	1	0	0	1		Q7SH17	A2QDA9
Pyruvate carboxyltransferase	IPR000891_PF00682	Cluster_2	2	0	0	0	0	1	1	2	1	3	2	1	1	1	1	1	1	2	1	2	1	1	1	1	1	2	1		Q9P3J2	A2QCT6	g1085.t1
Pyruvate carboxyltransferase	IPR000891_PF00682	Cluster_3	0	2	2	1	2	1	1	1	2	1	1	1	1	2	1	1	1	1	1	1	1	1	1	1	1	1	1	P06208,Q12166	Q7SFM2	A2QAX8,A2QSZ0	g775.t1
Pyruvate carboxyltransferase	IPR000891_PF00682	Cluster_4	1	1	1	1	2	1	2	1	1	1	1	1	1	1	1	1	1	1	1	1	1	1	1	1	1	1	1	P11154,P32327	Q7SHV6	A2QI31	g586.t1
Ribosomal protein S26e	IPR000892_PF01283	Cluster_1	3	1	1	1	2	1	1	0	1	1	1	1	1	1	1	1	1	1	1	1	1	1	1	1	1	1	1	P39938,P39939	P21772	A2RB80	g3661.t1
Signal recognition particle, SRP54 subunit, GTPase domain	IPR000897_PF00448	Cluster_1	1	1	1	1	1	1	1	1	1	1	1	1	1	1	1	1	1	1	1	1	1	1	1	1	1	1	1	P20424	Q872L2	A2QUP4	g5950.t1
Signal recognition particle, SRP54 subunit, GTPase domain	IPR000897_PF00448	Cluster_2	1	0	0	1	0	1	1	1	1	1	1	1	1	1	1	1	1	1	1	1	1	1	1	1	1	1	1		Q7SI27	A2R4U8	g3391.t1
Sec7 domain	IPR000904_PF01369	Cluster_1	2	1	1	1	2	1	1	1	1	1	1	1	1	1	1	1	1	1	1	1	1	1	1	1	1	1	1	P47102,P39993	Q7SAL8	A2RAA6	g12834.t1
Sec7 domain	IPR000904_PF01369	Cluster_2	1	1	1	1	1	1	1	1	1	1	1	1	1	1	1	1	1	1	1	1	1	1	1	1	1	1	1	P11075	Q7SAX4	A2QMI2	g11538.t1
Sec7 domain	IPR000904_PF01369	Cluster_3	4	0	0	1	0	2	1	1	1	1	1	1	1	1	1	1	1	1	1	1	1	1	1	0	1	1	1		Q7S408	A2QY11	g3003.t1
Sec7 domain	IPR000904_PF01369	Cluster_4	0	0	0	0	1	1	1	1	1	1	1	1	1	1	1	1	1	1	1	1	1	1	1	0	1	1	1	Q06836	Q7RXW6	A2QZ99	g7553.t1
Gcp-like domain	IPR000905_PF00814	Cluster_1	1	1	1	1	1	1	1	1	1	1	1	1	1	1	1	1	1	1	1	1	1	1	1	1	1	2	1	P43122	Q7SD85	A2QMR2	g5889.t1
Gcp-like domain	IPR000905_PF00814	Cluster_2	1	1	1	1	1	1	1	1	1	1	1	1	1	1	1	1	1	1	1	1	1	1	1	1	1	1	1	P36132	Q7S745	A2R4M2	g6787.t1
Phospholipase C, phosphatidylinositol-specific , X domain	IPR000909_PF00388	Cluster_2	0	1	1	1	1	1	1	1	1	1	1	1	1	1	1	1	1	1	2	2	1	1	1	1	1	1	1	P32383	Q7S7C6	A2QRK1	g6955.t1
Phospholipase C, phosphatidylinositol-specific , X domain	IPR000909_PF00388	Cluster_3	0	1	2	1	0	1	1	1	1	1	1	0	1	2	1	1	1	1	1	1	1	1	1	0	1	2	1		Q7S2L4	A2Q9B3	g11524.t1
Phospholipase C, phosphatidylinositol-specific , X domain	IPR000909_PF00388	Cluster_4	0	0	0	0	0	0	0	0	0	0	0	0	0	0	1	1	2	2	1	1	1	1	1	0	0	0	1				g5277.t1
60S ribosomal protein L6E	IPR000915_PF01159	Cluster_1	0	0	0	0	0	0	1	1	1	1	1	0	1	1	1	1	1	1	1	1	1	1	1	0	0	0	1		Q7SH22	A2QQR3	g3737.t1
Sulfatase	IPR000917_PF00884	Cluster_5	0	0	0	0	0	0	1	1	1	1	1	1	1	1	1	1	1	1	1	1	1	1	1	0	1	0	1		Q7SGQ1	A5AB40	g2651.t1
GTP cyclohydrolase II, RibA	IPR000926_PF00925	Cluster_1	1	1	1	1	1	1	1	1	1	1	1	1	1	1	1	1	0	1	1	1	1	1	1	1	1	2	1	P38066	Q871B3	A2QRK6	g11923.t1
GTP cyclohydrolase II, RibA	IPR000926_PF00925	Cluster_2	1	0	0	1	0	1	1	1	2	1	1	1	1	1	1	1	1	0	1	2	1	1	1	1	1	1	1		Q871N8	A2QUY6,A2R0S8	g3261.t1
CAP Gly-rich domain	IPR000938_PF01302	Cluster_1	1	1	1	1	1	1	1	1	1	1	1	1	1	1	1	1	1	1	1	1	1	1	1	1	1	2	1	P53904	Q9P504	A2QPQ0	g13578.t1
CAP Gly-rich domain	IPR000938_PF01302	Cluster_2	2	1	1	1	1	1	1	1	1	1	1	1	1	1	1	1	1	1	1	1	1	1	1	1	1	0	1	P33420	Q01397	A2QC58	g9950.t1
CAP Gly-rich domain	IPR000938_PF01302	Cluster_3	0	1	1	1	1	1	0	1	1	1	1	1	1	1	1	1	1	1	1	1	1	1	1	1	1	1	1	P39937	Q7S2L0	A2Q9A1	g7023.t1
CAP Gly-rich domain	IPR000938_PF01302	Cluster_4	0	0	1	1	0	1	1	1	1	1	1	1	1	1	1	1	1	1	1	1	1	1	1	0	0	0	1		Q7S1L4	A2R8S6	g12517.t1
POLO box duplicated domain	IPR000959_PF00659	Cluster_1	1	1	1	1	1	1	0	0	0	0	0	1	1	1	1	0	1	1	1	1	0	0	0	1	1	1	1	P32562	Q7SF52
Ribosomal protein L24e-related	IPR000988_PF01246	Cluster_1	2	1	1	1	1	1	0	1	1	1	1	1	1	1	1	1	1	1	1	1	1	1	1	1	1	1	1	Q07915	Q7S8U9	A2QNU1	g11328.t1
Ribosomal protein L24e-related	IPR000988_PF01246	Cluster_2	0	1	1	1	2	1	0	1	1	1	1	1	1	1	1	1	1	1	1	1	1	1	1	1	0	1	1	P04449,P24000	Q7SDU2	A2R095	g12717.t1
Peptidase M24, structural domain	IPR000994_PF00557	Cluster_3	3	1	1	1	1	1	1	2	2	2	2	1	1	1	1	1	1	2	1	1	1	1	1	1	1	1	1	Q01662	Q7S3D0	A2QPE0,A2QAF7	g14509.t1
Peptidase M24, structural domain	IPR000994_PF00557	Cluster_4	3	2	2	2	1	1	1	1	1	1	1	1	1	1	1	1	1	1	1	1	1	1	1	2	2	1	1	Q07825	Q7RYL6	A2QGR5	g16092.t1
Peptidase M24, structural domain	IPR000994_PF00557	Cluster_5	1	1	1	1	1	1	1	1	1	1	1	1	1	1	1	1	1	1	1	1	1	1	1	1	1	5	1	P32558	Q8X0X6	A2QPS0	g1476.t1
Peptidase M24, structural domain	IPR000994_PF00557	Cluster_6	3	1	1	1	0	1	1	1	1	1	1	1	1	1	1	1	1	1	1	1	1	1	1	1	1	1	1		Q7RXT6	A2QK01	g14894.t1
Clathrin light chain	IPR000996_PF01086	Cluster_1	0	0	0	0	0	0	1	1	1	1	1	1	1	1	1	1	1	1	1	1	1	1	1	0	0	0	1		Q8NIW3	A2QJG9	g7579.t1
Ribonuclease III domain	IPR000999_PF00636	Cluster_1	2	0	0	0	0	0	1	1	1	0	1	1	1	1	1	1	1	1	1	1	1	1	1	1	0	5	1		Q7S8J7	A2RAF3	g6450.t1
Ribonuclease III domain	IPR000999_PF00636	Cluster_2	0	0	1	1	1	1	1	1	0	1	1	1	1	1	1	1	1	1	1	1	1	1	1	0	1	0	1	Q02555	Q9P6D6		g4250.t1
Ribonuclease III domain	IPR000999_PF00636	Cluster_3	0	0	0	0	0	0	1	2	2	1	2	1	1	2	1	1	1	1	1	1	1	1	1	0	0	0	1		Q7SCC1	A2QX45,A2R345	g5834.t1
SANT/Myb domain	IPR001005_PF00249	Cluster_1	3	2	1	1	2	1	0	1	0	1	0	1	1	1	1	1	1	1	1	1	1	1	1	0	1	1	1	P43609,P32591	Q7SAN7		g12054.t1
SANT/Myb domain	IPR001005_PF00249	Cluster_3	1	1	1	1	1	1	1	0	1	1	1	1	1	1	1	1	1	1	1	1	1	1	1	1	1	1	1	Q02336	Q7RYE8	A2QD51	g1185.t1
SANT/Myb domain	IPR001005_PF00249	Cluster_7	0	0	0	0	0	0	1	0	1	1	1	0	1	0	1	1	1	1	1	1	1	0	1	0	0	0	1		Q7SBQ3	A2QNX7	g4492.t1
SANT/Myb domain	IPR001005_PF00249	Cluster_8	0	0	0	0	0	0	0	1	1	1	1	1	1	0	1	1	1	0	1	1	1	1	1	0	0	0	1		Q9P511	A2QPP8	g13580.t1
SANT/Myb domain	IPR001005_PF00249	Cluster_9	0	0	0	0	0	1	0	0	0	0	0	0	1	1	1	1	1	1	1	1	0	0	1	0	1	1	1		Q7SE02		g9032.t1
SANT/Myb domain	IPR001005_PF00249	Cluster_11	0	0	0	0	0	0	0	0	0	0	0	0	0	0	1	0	1	1	1	1	1	0	1	0	0	0	1				g9188.t1
UBX	IPR001012_PF00789	Cluster_1	2	1	1	2	2	1	1	1	1	1	0	1	0	1	1	1	1	1	1	1	1	0	1	1	1	1	1	Q04228,Q12229		A2QAQ4	g15496.t1
UBX	IPR001012_PF00789	Cluster_2	1	1	1	1	1	1	1	1	1	1	1	1	1	1	1	1	1	1	1	1	1	1	1	1	1	1	1	P34223	Q8X0G7	A2QUL2	g5958.t1
UBX	IPR001012_PF00789	Cluster_3	1	1	1	1	1	1	1	1	1	1	1	1	1	1	1	1	1	1	1	1	1	0	1	0	0	0	1	Q06682	Q7SFV8	A2R1D9	g15709.t1
UBX	IPR001012_PF00789	Cluster_4	1	1	1	1	2	0	1	1	1	1	0	1	1	1	1	1	1	1	1	1	1	1	1	0	0	0	1	P47049,P38349	Q7SER3	A5ABP7	g5192.t1
Ferrochelatase	IPR001015_PF00762	Cluster_1	0	0	0	0	0	0	1	1	1	1	1	1	1	1	1	1	1	1	1	1	1	1	1	0	0	0	1		Q7SA94	A2R549	g4210.t1
Dehydrogenase, E1 component	IPR001017_PF00676	Cluster_1	3	1	1	1	1	1	1	2	1	1	1	1	1	1	1	1	1	1	1	2	1	1	1	2	1	1	1	P20967	Q7SC30	A2QIU5	g1547.t1
Dehydrogenase, E1 component	IPR001017_PF00676	Cluster_2	2	1	1	1	1	1	1	2	2	1	2	1	1	1	1	1	1	1	1	1	1	1	1	1	1	1	1	P16387	Q7RYJ2	A2QPI1,A2QWB4	g5626.t1
Dehydrogenase, E1 component	IPR001017_PF00676	Cluster_3	2	0	0	0	0	1	1	1	1	1	1	1	1	1	1	1	1	1	1	2	1	0	1	1	1	1	1		Q7S5Z0	A2QTN1	g5376.t1
Bromo adjacent homology (BAH) domain	IPR001025_PF01426	Cluster_1	0	1	1	1	2	1	1	0	1	1	1	1	1	1	1	1	1	1	1	1	1	1	1	1	1	0	1	P53236,Q06488	Q7S4X1	A2QY26	g7476.t1
Bromo adjacent homology (BAH) domain	IPR001025_PF01426	Cluster_2	2	1	1	1	1	1	1	0	0	1	1	1	0	1	1	1	1	1	1	1	1	1	1	1	1	0	1	P53127			g13027.t1
Bromo adjacent homology (BAH) domain	IPR001025_PF01426	Cluster_3	0	1	1	1	2	1	0	1	1	1	1	1	0	1	1	1	0	0	1	1	1	1	1	1	0	0	1	P54784,P06701		A2QQK2	g6611.t1
Bromo adjacent homology (BAH) domain	IPR001025_PF01426	Cluster_4	0	0	0	0	0	0	0	0	0	0	0	1	1	0	1	1	1	2	1	1	1	1	2	0	0	0	1		Q7SG37		g5069.t1,g15616.t1
Aconitase/3-isopropylmalate dehydratase large subunit, alpha/beta/alpha	IPR001030_PF00330	Cluster_2	1	1	1	1	1	1	1	1	1	1	1	1	1	1	1	1	2	2	1	3	1	1	1	1	1	1	1	P49367	Q870W1	A2R4G6	g5246.t1
Aconitase/3-isopropylmalate dehydratase large subunit, alpha/beta/alpha	IPR001030_PF00330	Cluster_3	2	1	1	1	1	1	1	1	1	1	1	1	1	1	1	1	1	1	1	1	1	1	1	1	1	1	1	P07264	Q7RZ87	A2QCE1	g5312.t1
Translation Initiation factor eIF- 4e	IPR001040_PF01652	Cluster_1	3	1	1	1	1	1	1	1	1	1	1	1	1	1	1	1	1	1	1	1	1	1	2	1	1	2	1	P07260	Q7SEY8	A2QYI2	g15743.t1,g16161.t1
Translation Initiation factor eIF- 4e	IPR001040_PF01652	Cluster_2	1	0	0	0	0	1	1	1	1	1	1	1	1	1	1	1	1	1	1	2	1	1	1	1	0	0	1		Q7S2B5	A2QUE6	g1596.t1
Translation Initiation factor eIF- 4e	IPR001040_PF01652	Cluster_3	0	0	0	0	0	0	1	1	1	1	0	1	1	1	1	1	1	1	1	1	1	1	1	0	0	0	1		Q7S7Y2	A2QR15	g13103.t1
2Fe-2S ferredoxin-type domain	IPR001041_PF00111	Cluster_1	1	1	1	1	1	1	0	1	1	0	1	1	1	0	1	1	1	1	1	1	1	0	1	1	1	1	1	Q12184	Q7S0K4	A2QUP2	g4338.t1
2Fe-2S ferredoxin-type domain	IPR001041_PF00111	Cluster_3	0	0	0	1	0	0	1	1	2	1	1	2	0	0	1	1	1	0	1	1	1	1	1	0	1	0	1			A2QG16,A2QJ12	g758.t1
2Fe-2S ferredoxin-type domain	IPR001041_PF00111	Cluster_4	0	0	0	0	0	0	0	1	1	0	0	1	1	1	1	1	0	0	3	2	1	1	0	0	0	0	1		Q86ZH8	A2QAM9
Spermidine/spermine synthases family	IPR001045_PF01564	Cluster_1	1	2	2	2	2	2	1	1	1	1	1	1	1	1	1	1	1	1	1	1	1	0	1	2	1	1	1	Q12074,Q12455	Q9Y8H7	A2QRM5	g257.t1
Spermidine/spermine synthases family	IPR001045_PF01564	Cluster_2	0	0	0	0	0	0	1	1	1	1	1	1	1	1	1	1	1	1	1	1	1	1	1	1	0	1	1		Q7S5X0	A2QNC6	g16034.t1
Natural resistance-associated macrophage like	IPR001046_PF01566	Cluster_1	1	3	4	3	3	2	1	1	1	1	1	0	2	0	1	1	1	1	1	1	2	1	0	2	1	1	1	P38925,P38778,Q12078	Q7S317,Q9P4X9	A2QJ36
Aspartate/glutamate/uridylate kinase	IPR001048_PF00696	Cluster_1	4	1	1	1	1	1	1	1	1	1	1	1	1	1	1	1	1	1	1	2	2	1	1	1	1	1	1	P10869	Q8NIW0	A2R9Q7	g15258.t1
Aspartate/glutamate/uridylate kinase	IPR001048_PF00696	Cluster_2	1	1	1	1	1	1	1	0	2	1	1	1	1	1	1	2	1	2	1	1	1	1	1	1	1	2	1	Q01217	P54898	A2R068,A2QG53	g2408.t1
Aspartate/glutamate/uridylate kinase	IPR001048_PF00696	Cluster_3	1	1	1	1	2	1	1	1	1	1	1	1	1	1	1	1	1	1	1	1	1	1	1	1	1	1	1	P32264,P38690	Q7RYM2	A2QKG3	g8915.t1
Adenylyl cyclase class-3/4/guanylyl cyclase	IPR001054_PF00211	Cluster_1	3	1	1	1	1	1	1	1	1	1	1	1	1	1	1	1	1	1	1	1	1	1	1	1	1	1	1	P08678	Q01631	A2QVI2	g11576.t1
FCH domain	IPR001060_PF00611	Cluster_1	3	1	1	1	1	1	1	1	1	1	1	1	1	1	1	1	1	1	1	1	1	1	1	1	1	2	1	P38339	Q7SF96	A5ABQ5	g4863.t1
FCH domain	IPR001060_PF00611	Cluster_2	1	1	1	1	1	1	1	1	1	1	1	1	1	1	1	1	1	1	1	1	1	1	1	1	1	2	1	P38822	Q8X0X3	A2QUY8	g6202.t1
FCH domain	IPR001060_PF00611	Cluster_3	2	1	1	1	0	1	1	1	1	1	1	1	1	1	1	1	1	1	0	0	1	1	1	1	1	3	1		Q7S690	A2R7N0	g239.t1
FCH domain	IPR001060_PF00611	Cluster_4	3	1	1	1	1	2	1	1	1	1	1	1	1	0	1	1	1	1	1	1	1	1	1	0	0	1	1	P43556	Q7S2C4	A2R1D7	g11206.t1
FCH domain	IPR001060_PF00611	Cluster_5	0	0	0	0	0	0	1	0	1	1	1	1	1	1	1	1	0	0	1	1	1	1	1	0	1	1	1		Q7RZ47	A2QRN6	g1225.t1
Ribosomal protein L22/L17	IPR001063_PF00237	Cluster_1	4	1	1	1	2	1	1	1	1	1	1	1	1	1	1	1	1	1	1	1	1	1	1	1	1	1	1	P05740,P46990	Q9HE25	A2QAR0	g7584.t1
Ribosomal protein L22/L17	IPR001063_PF00237	Cluster_2	0	0	0	0	0	0	1	1	1	1	1	1	1	1	1	1	1	1	1	1	1	1	1	0	0	0	1		Q7S5N0	A2QND9	g4670.t1
NIF system FeS cluster assembly, NifU, C-terminal	IPR001075_PF01106	Cluster_1	2	0	0	0	0	1	1	0	1	1	1	1	1	1	1	1	1	1	1	1	1	1	1	1	1	1	1		Q8X030	A2Q883	g6483.t1
O-methyltransferase, family 2	IPR001077_PF00891	Cluster_2	0	0	0	0	0	0	0	1	1	1	0	1	1	0	1	1	1	1	1	1	1	0	0	0	0	0	1		Q7RU17	A2QZL7
2-oxoacid dehydrogenase acyltransferase, catalytic domain	IPR001078_PF00198	Cluster_1	2	1	1	1	1	1	1	2	1	1	1	1	1	1	1	1	1	1	2	1	2	1	1	1	1	0	1	P19262	Q7S3Y3	A2QY46	g9255.t1
2-oxoacid dehydrogenase acyltransferase, catalytic domain	IPR001078_PF00198	Cluster_2	2	1	1	1	1	1	1	1	1	1	1	1	1	1	1	1	1	1	1	1	1	1	1	1	1	2	1	P12695	P20285	A2QMI1	g11539.t1
2-oxoacid dehydrogenase acyltransferase, catalytic domain	IPR001078_PF00198	Cluster_3	1	0	0	0	0	1	1	1	1	1	1	1	1	1	1	1	1	1	1	2	1	1	1	0	1	1	1		Q7SH25	A2QTN3	g3742.t1
Copper fist DNA-binding	IPR001083_PF00649	Cluster_1	1	1	1	1	2	1	1	0	1	1	4	1	1	0	1	1	0	0	1	2	0	1	1	3	0	1	1	P15315,Q12753	Q7S6K5	A2QVU7	g1394.t1
Copper fist DNA-binding	IPR001083_PF00649	Cluster_2	0	0	0	0	0	0	1	0	0	1	1	0	1	1	1	1	0	0	1	1	1	1	1	0	0	0	1		Q7S636		g10408.t1
Prephenate dehydratase	IPR001086_PF00800	Cluster_1	1	1	1	1	1	1	1	1	1	1	1	1	1	0	1	1	1	1	1	1	1	1	1	1	1	1	1	P32452	Q7RYQ1	A2R9Q0	g11122.t1
IMP dehydrogenase/GMP reductase	IPR001093_PF00478	Cluster_1	2	1	2	1	3	1	1	1	1	2	2	1	1	1	1	1	1	1	1	1	1	1	1	1	1	1	1	P38697,P50095,P50094	Q7SFX7	A2QP46	g5702.t1
Peptidase C13, legumain	IPR001096_PF01650	Cluster_1	0	1	1	1	1	1	1	1	1	1	1	1	1	1	1	1	1	1	1	1	1	1	1	1	1	1	1	P49018	Q7S956	A2QB15	g1192.t1
DNA-directed DNA polymerase, family A, palm domain	IPR001098_PF00476	Cluster_1	1	1	1	1	1	1	1	1	1	1	1	1	1	1	1	1	1	1	1	1	1	1	1	1	1	1	1	P15801	Q9Y767	A2R449	g7639.t1
Chalcone/stilbene synthase, N-terminal	IPR001099_PF00195	Cluster_1	0	0	0	0	0	0	1	2	1	0	1	2	1	2	0	0	0	0	1	2	1	1	1	3	0	0	1		Q7S6N4	A2QL98	g1385.t1
3-oxo-5-alpha-steroid 4-dehydrogenase, C-terminal	IPR001104_PF02544	Cluster_1	1	1	1	1	1	1	1	2	1	1	1	1	1	1	1	1	1	1	1	1	1	1	1	1	1	1	1	Q99190	Q873J6	A2QJ60	g6233.t1
3-oxo-5-alpha-steroid 4-dehydrogenase, C-terminal	IPR001104_PF02544	Cluster_2	1	0	0	0	0	0	0	1	1	0	1	1	1	1	1	1	1	1	1	1	1	1	1	1	1	0	1		Q7RXE8	A5AAM8	g10594.t1
3-oxo-5-alpha-steroid 4-dehydrogenase, C-terminal	IPR001104_PF02544	Cluster_3	0	0	0	0	0	0	0	1	1	1	1	1	1	1	1	1	1	1	1	1	1	1	1	0	0	0	1		Q7RYS3	A2RAT5	g6046.t1
Band 7 protein	IPR001107_PF01145	Cluster_2	4	1	1	1	0	1	1	1	1	1	1	1	1	1	1	1	1	1	1	1	1	1	1	1	1	0	1		Q7RY18	A2QE43	g6249.t1
Band 7 protein	IPR001107_PF01145	Cluster_3	1	1	1	1	0	1	1	1	1	1	1	1	1	1	1	1	1	1	1	1	1	1	1	0	0	0	1		Q7S5S5	A2QQ82	g12989.t1
Band 7 protein	IPR001107_PF01145	Cluster_4	0	0	0	0	0	0	1	0	1	1	0	1	1	1	0	1	1	0	1	1	1	1	1	0	0	0	1		Q7S406	A2QKN3	g911.t1
Adenylosuccinate synthetase	IPR001114_PF00709	Cluster_1	1	1	1	1	1	1	1	1	1	1	1	1	1	1	1	2	2	2	1	2	1	1	1	1	1	1	1	P80210	Q7S604	A2QB52	g5297.t1
DNA-repair protein, UmuC-like	IPR001126_PF00817	Cluster_1	0	1	1	1	1	1	1	1	1	1	1	1	1	1	1	1	1	1	1	1	1	1	1	1	1	2	1	Q04049	Q7SDN7	A2QN22	g3373.t1
DNA-repair protein, UmuC-like	IPR001126_PF00817	Cluster_2	0	1	1	1	1	1	1	1	1	1	1	1	1	1	1	1	1	1	1	1	1	1	1	1	1	1	1	P12689	Q7SDE5	A2QTI4	g12805.t1
DNA-repair protein, UmuC-like	IPR001126_PF00817	Cluster_3	1	0	0	0	0	0	1	1	1	1	1	1	1	1	1	1	1	1	1	1	1	1	1	1	1	1	1		Q7S449	A2QYP0	g1306.t1
DNA-repair protein, UmuC-like	IPR001126_PF00817	Cluster_4	0	0	0	0	0	0	1	0	1	1	1	2	1	1	1	1	1	0	1	1	1	1	1	0	1	0	1		Q7SCC4	A2QJ22	g1561.t1
TatD family	IPR001130_PF01026	Cluster_1	1	1	1	1	1	1	1	2	3	2	2	1	1	2	1	1	1	1	2	2	2	1	1	1	1	1	1	P34220	Q7RU60	A5AAJ3,A2R6M5,A2QLT6	g9461.t1
TatD family	IPR001130_PF01026	Cluster_2	1	1	1	1	1	1	1	1	1	1	1	1	1	1	1	1	1	1	2	2	1	1	1	0	1	0	1	P38430	Q7S8M5	A2Q812	g8733.t1
NADH-quinone oxidoreductase, subunit D	IPR001135_PF00346	Cluster_1	2	1	1	1	0	1	1	1	1	1	1	1	1	1	1	1	1	1	1	1	1	1	1	1	1	1	1		P22142	A2QD14	g562.t1
Zn(2)-C6 fungal-type DNA-binding domain	IPR001138_PF00172	Cluster_31	0	1	0	1	0	0	0	2	4	1	3	2	0	0	2	2	1	2	0	5	0	1	0	0	4	0	1			A2QBM2,A2R683,A2Q7V2,A2QIC3
Zn(2)-C6 fungal-type DNA-binding domain	IPR001138_PF00172	Cluster_35	0	0	2	0	0	0	0	2	2	4	2	2	1	3	1	1	0	0	1	1	1	1	1	2	2	0	1		Q7SAH8	A2QJX5,A2R5W7	g8742.t1
Zn(2)-C6 fungal-type DNA-binding domain	IPR001138_PF00172	Cluster_37	0	2	2	1	0	0	0	2	2	2	4	1	1	1	1	1	0	1	0	1	1	0	1	1	2	0	1		Q7SE34	A2QY05,A2QAX1	g15657.t1
Zn(2)-C6 fungal-type DNA-binding domain	IPR001138_PF00172	Cluster_39	0	0	0	0	0	0	0	2	1	5	0	3	0	2	1	0	0	1	1	2	3	0	0	0	0	0	1			A2QXJ1
Zn(2)-C6 fungal-type DNA-binding domain	IPR001138_PF00172	Cluster_43	0	0	0	1	0	0	1	2	1	1	3	1	1	2	1	1	1	1	0	1	1	1	1	0	2	1	1		Q7S3B2	A2QSS5	g6186.t1
Zn(2)-C6 fungal-type DNA-binding domain	IPR001138_PF00172	Cluster_44	0	1	0	0	0	1	1	0	2	1	2	2	0	1	0	2	2	2	1	1	2	1	0	0	0	0	1			A2QG74,A2R079
Zn(2)-C6 fungal-type DNA-binding domain	IPR001138_PF00172	Cluster_46	0	0	0	0	2	1	0	0	1	1	0	1	1	1	1	1	0	1	1	1	1	3	1	1	1	0	1	Q12180,P38114	Q7RWF9	A2R0G3	g15046.t1
Zn(2)-C6 fungal-type DNA-binding domain	IPR001138_PF00172	Cluster_49	0	0	0	0	0	0	0	2	0	1	2	1	1	1	1	1	0	0	1	2	1	1	1	2	0	1	1		Q96UE1		g8751.t1
Zn(2)-C6 fungal-type DNA-binding domain	IPR001138_PF00172	Cluster_50	0	0	0	0	0	0	0	1	0	2	2	2	0	0	1	1	1	2	3	4	0	0	1	0	0	0	1				g5434.t1
Zn(2)-C6 fungal-type DNA-binding domain	IPR001138_PF00172	Cluster_52	0	0	0	0	0	0	0	1	1	1	1	1	1	1	1	1	1	1	1	2	1	1	0	0	2	0	1		Q9P3I4	A2QB26
Zn(2)-C6 fungal-type DNA-binding domain	IPR001138_PF00172	Cluster_55	0	0	1	0	1	0	0	1	1	1	1	0	1	1	1	1	1	0	1	1	1	1	1	0	0	0	1	P32862	Q7S6K8	A2QVU6	g1391.t1
Zn(2)-C6 fungal-type DNA-binding domain	IPR001138_PF00172	Cluster_56	0	0	0	0	0	0	1	1	1	1	1	1	1	1	1	1	0	1	1	1	1	1	1	0	0	0	1		Q7S563	A2R7F0	g14008.t1
Zn(2)-C6 fungal-type DNA-binding domain	IPR001138_PF00172	Cluster_59	1	0	0	0	0	0	0	1	0	2	2	0	1	0	1	1	1	1	1	1	1	0	1	0	0	0	1		Q7SHP1		g15221.t1
Zn(2)-C6 fungal-type DNA-binding domain	IPR001138_PF00172	Cluster_61	0	0	0	0	0	0	0	0	1	1	2	0	0	1	1	2	0	0	0	1	1	1	2	0	0	0	1			A2R420	g3355.t1,g8363.t1
Zn(2)-C6 fungal-type DNA-binding domain	IPR001138_PF00172	Cluster_62	0	0	0	0	0	0	0	0	2	0	2	0	1	0	1	1	0	1	0	1	2	0	0	0	0	0	1		Q7S9C6	A2R2U3,A2QZT1
Zn(2)-C6 fungal-type DNA-binding domain	IPR001138_PF00172	Cluster_64	0	0	0	0	0	0	1	0	1	1	1	0	0	0	1	1	1	1	1	0	1	1	1	0	0	0	1			A2R0L5	g11368.t1
Zn(2)-C6 fungal-type DNA-binding domain	IPR001138_PF00172	Cluster_65	0	0	0	0	1	0	0	0	0	0	1	1	1	0	1	1	0	0	1	1	1	1	1	0	1	0	1	P38073	Q7RZ17		g13772.t1
Zn(2)-C6 fungal-type DNA-binding domain	IPR001138_PF00172	Cluster_66	0	0	0	0	0	0	0	0	1	0	1	1	2	1	0	0	1	1	1	1	1	0	0	0	0	0	1		Q7S3Q7,Q7SHH0	A5AAW5
Zn(2)-C6 fungal-type DNA-binding domain	IPR001138_PF00172	Cluster_72	0	0	0	0	0	0	0	0	0	0	0	0	1	1	1	1	0	1	0	1	1	1	1	0	0	0	1		Q7SA96		g4205.t1
Ribosomal protein L27e	IPR001141_PF01777	Cluster_1	5	1	1	1	2	1	1	1	1	1	1	1	1	1	1	1	1	1	1	1	1	1	1	1	1	1	1	P0C2H6,P0C2H7	Q872T5	A2RB04	g2346.t1
Alpha carbonic anhydrase	IPR001148_PF00194	Cluster_1	0	0	0	0	0	0	0	1	1	0	0	1	1	2	1	1	0	1	2	1	2	1	2	0	0	0	1		Q7S607	A2R1V0	g7155.t1,g12917.t1
Ribonucleoprotein LSM domain	IPR001163_PF01423	Cluster_1	0	0	0	0	0	0	1	1	1	0	1	1	1	1	1	1	1	1	1	1	1	1	1	0	0	0	1		Q9C252	A2R441	g7099.t1
Ribonucleoprotein LSM domain	IPR001163_PF01423	Cluster_2	0	0	0	0	0	0	1	1	1	1	1	0	1	1	1	1	1	1	1	1	1	0	1	0	0	0	1		Q9C2A8	A2QJD5	g4367.t1
Ribonucleoprotein LSM domain	IPR001163_PF01423	Cluster_3	0	0	0	0	0	0	0	0	0	0	0	0	1	1	1	1	0	1	0	1	1	1	1	0	0	0	1		Q7SHV3		g579.t1
Arf GTPase activating protein	IPR001164_PF01412	Cluster_1	2	1	1	1	1	1	0	1	1	1	1	1	1	1	1	1	1	1	1	1	1	1	1	1	2	1	1	P40529	Q7RZD7	A2QVU2	g8381.t1
Arf GTPase activating protein	IPR001164_PF01412	Cluster_2	1	1	1	1	1	1	0	1	1	1	1	1	1	1	1	1	1	1	1	1	1	1	1	1	1	1	1	P38682	Q7S8S4	A2R803	g11902.t1
Arf GTPase activating protein	IPR001164_PF01412	Cluster_3	1	1	1	1	2	1	1	1	1	1	1	1	1	1	1	1	1	1	1	1	1	1	1	1	0	0	1	P35197,P32572	Q7S8Q7	A2R977	g451.t1
Arf GTPase activating protein	IPR001164_PF01412	Cluster_4	2	1	1	0	0	1	1	1	1	1	1	1	0	1	1	1	1	1	1	1	1	1	1	0	0	0	1			A2R173	g6762.t1
Arf GTPase activating protein	IPR001164_PF01412	Cluster_5	2	1	1	1	1	0	1	1	1	1	1	1	1	0	1	1	0	1	1	0	1	1	1	0	1	0	1	P40956	Q8X0W4	A2QIN1	g13630.t1
Glycosyl transferase, family 2	IPR001173_PF00535	Cluster_2	1	1	1	1	1	1	1	1	1	1	1	1	1	1	1	1	1	1	1	1	1	1	1	1	1	1	1	P40350	Q7S9G1	A2QGT3	g394.t1
Glycosyl transferase, family 2	IPR001173_PF00535	Cluster_3	1	1	1	0	0	1	1	1	1	1	1	1	1	1	1	1	1	1	1	1	1	1	1	0	0	2	1		Q7S920	A2R7Q2	g15116.t1
Peptidyl-prolyl cis-trans isomerase, FKBP-type, domain	IPR001179_PF00254	Cluster_1	0	1	1	1	2	1	1	1	1	1	1	1	1	1	1	1	1	1	1	1	1	1	1	0	0	0	1	P38911,Q06205	Q7SCN0	A2QWK4	g1667.t1
Peptidyl-prolyl cis-trans isomerase, FKBP-type, domain	IPR001179_PF00254	Cluster_2	0	0	0	0	0	0	0	0	0	0	0	0	1	1	1	1	1	1	1	1	1	1	0	0	0	0	1		O60046
Citron-like	IPR001180_PF00780	Cluster_1	8	1	1	1	2	1	1	1	1	1	1	1	1	1	1	1	1	1	1	1	1	1	1	2	2	3	1	P53046,P51862	Q7SHY5	A2QNB9	g9743.t1
Citron-like	IPR001180_PF00780	Cluster_2	0	1	1	1	1	1	1	1	1	1	1	1	1	1	1	1	1	1	1	1	1	1	1	0	0	0	1	Q06412	Q7SE44	A2R570	g9060.t1
Citron-like	IPR001180_PF00780	Cluster_3	1	0	0	0	0	1	0	1	1	1	1	1	1	1	1	1	1	1	0	1	1	1	1	1	0	1	1		Q7RWZ4	A2QMH4	g14432.t1
DENN domain	IPR001194_PF02141	Cluster_1	0	0	0	0	0	0	1	1	1	1	1	1	1	1	1	1	1	1	1	1	1	0	1	1	1	1	1		Q873J4	A2QRX4	g10899.t1
DENN domain	IPR001194_PF02141	Cluster_2	1	0	0	0	0	0	1	1	1	1	1	1	1	1	1	1	1	1	1	1	1	1	1	0	0	0	1		Q9P3C6	A2QHR7	g4301.t1
Cytochrome b5-like heme/steroid binding domain	IPR001199_PF00173	Cluster_6	2	2	2	2	1	1	1	4	2	2	2	2	1	1	1	2	1	1	1	3	1	1	1	3	1	2	1	P21147	Q7S8C6	A2QMF9,A2R0V5	g343.t1
Cytochrome b5-like heme/steroid binding domain	IPR001199_PF00173	Cluster_8	4	1	1	1	1	1	1	1	1	1	1	1	1	1	1	1	1	1	1	1	1	1	1	1	1	1	1	Q03529	Q7RW89	A2QB78	g9932.t1
Cytochrome b5-like heme/steroid binding domain	IPR001199_PF00173	Cluster_9	2	1	1	0	0	0	1	1	1	1	1	1	1	1	1	1	1	1	1	1	1	1	2	1	1	2	1		Q7SHN7	A2R8H3	g14870.t1,g6514.t1
Cytochrome b5-like heme/steroid binding domain	IPR001199_PF00173	Cluster_10	1	1	1	1	1	1	1	1	1	1	1	0	1	1	1	1	1	1	1	0	1	1	1	1	1	1	1	Q04772	Q7S4Z9	A2Q951	g5731.t1
WW domain	IPR001202_PF00397	Cluster_1	4	1	1	1	1	1	1	0	1	1	1	1	1	1	1	1	1	1	1	3	1	1	1	1	1	1	1	P39940	Q7RV01	A2QQ28	g7385.t1
WW domain	IPR001202_PF00397	Cluster_2	0	1	1	1	1	1	1	1	1	1	1	1	1	1	1	1	1	1	1	1	1	1	1	1	1	1	1	P33203	Q7SD01	A2QQE3	g505.t1
WW domain	IPR001202_PF00397	Cluster_3	1	2	1	1	1	1	0	1	1	1	1	1	1	1	1	1	1	1	1	1	1	1	1	1	1	0	1	P22696	O60045	A2QZ76	g8875.t1
WW domain	IPR001202_PF00397	Cluster_4	0	1	1	1	1	1	1	0	3	1	1	1	0	1	1	1	1	1	1	0	1	0	1	0	0	0	1	P43582		A2R9V7,A2QUT9,A2QJE3	g2317.t1
WW domain	IPR001202_PF00397	Cluster_5	0	0	0	1	1	0	1	1	1	0	1	1	0	1	1	1	1	1	1	0	1	1	1	1	1	1	1	Q06525		A2QWW8	g8051.t1
WW domain	IPR001202_PF00397	Cluster_6	0	0	0	0	0	0	1	1	0	1	1	1	1	1	1	1	1	1	1	1	1	1	1	0	0	0	1		Q7SDK1		g6743.t1
WW domain	IPR001202_PF00397	Cluster_7	1	1	1	1	0	0	1	0	0	0	0	1	1	0	1	1	1	1	1	1	1	1	1	0	0	0	1		Q7RYK0		g13414.t1
WW domain	IPR001202_PF00397	Cluster_8	0	0	0	0	0	0	0	1	1	1	1	1	0	1	1	1	1	1	1	1	1	1	0	1	0	0	1			A2QMU6
WW domain	IPR001202_PF00397	Cluster_9	0	0	0	0	0	0	0	0	0	1	0	2	1	1	1	1	1	1	1	1	2	2	0	0	0	0	1		Q7S233
Diacylglycerol kinase, catalytic domain	IPR001206_PF00781	Cluster_1	1	1	1	1	2	0	1	1	1	1	1	1	1	1	1	1	2	1	1	1	1	1	1	1	1	1	1	Q12246,Q06147	Q7S9Y1	A2QQP9	g3846.t1
Diacylglycerol kinase, catalytic domain	IPR001206_PF00781	Cluster_2	0	1	1	0	0	1	1	0	0	1	1	1	1	1	1	1	1	1	1	0	1	0	1	0	0	0	1		Q7S9W9		g1878.t1
Ribosomal protein S14	IPR001209_PF00253	Cluster_1	1	1	1	1	1	1	1	1	1	1	1	1	1	1	1	1	1	1	1	1	1	1	1	1	1	0	1	P10663	Q7SF85	A2QNQ1	g2401.t1
Ribosomal protein S14	IPR001209_PF00253	Cluster_2	3	1	0	1	2	1	0	0	1	1	1	0	1	1	1	1	1	0	1	1	1	1	1	1	0	1	1	P41057,P41058	Q9C2P2	A2QLP1	g6148.t1
Ribosomal protein S17e	IPR001210_PF00833	Cluster_1	2	1	1	1	2	1	1	1	1	1	1	1	1	1	1	1	1	1	1	1	1	1	1	1	1	2	1	P02407,P14127	P27770	A2R7T6	g9903.t1
SET domain	IPR001214_PF00856	Cluster_1	3	1	1	1	1	1	1	1	1	1	1	1	1	1	1	1	1	1	1	1	1	1	1	1	1	1	1	P46995	Q7RZU4	A2R9L2	g12356.t1
SET domain	IPR001214_PF00856	Cluster_2	2	1	1	1	1	1	1	1	1	1	1	1	1	1	1	1	1	1	1	1	1	1	1	1	1	1	1	P38827	Q8X0S9	A2RBI5	g11215.t1
SET domain	IPR001214_PF00856	Cluster_3	1	1	1	1	1	1	1	1	1	1	1	2	1	1	1	1	1	1	1	1	1	1	1	1	1	1	1	Q12504	Q7S1R5	A2R4M1	g4354.t1
SET domain	IPR001214_PF00856	Cluster_4	0	0	0	0	0	0	0	0	0	0	0	1	1	1	2	2	2	2	1	1	1	1	1	0	0	0	1		Q7SEQ8		g1292.t1
SET domain	IPR001214_PF00856	Cluster_5	0	0	0	0	0	0	1	1	1	1	1	1	1	1	1	1	1	1	1	1	1	1	1	0	0	0	1		Q7SBJ9	A2QZ73	g8870.t1
SET domain	IPR001214_PF00856	Cluster_6	1	0	0	0	0	0	1	0	1	1	1	1	1	0	1	0	1	1	1	1	1	1	1	0	1	0	1		Q7SDP1	A5ABN5	g3377.t1
SET domain	IPR001214_PF00856	Cluster_7	0	0	0	0	0	0	1	1	1	1	1	1	0	1	1	1	1	1	1	1	1	0	0	0	0	0	1			A2QCD7
SET domain	IPR001214_PF00856	Cluster_9	1	0	0	0	0	0	1	0	0	0	0	0	1	1	1	1	1	1	1	1	1	1	1	0	0	0	1		Q8X225		g3862.t1
SET domain	IPR001214_PF00856	Cluster_10	0	0	0	0	0	0	0	0	0	0	0	0	1	1	1	1	1	1	1	1	1	1	1	0	0	0	1		Q7SH07		g859.t1
SET domain	IPR001214_PF00856	Cluster_11	0	0	0	0	0	0	0	0	0	0	0	1	1	1	1	1	1	1	1	1	1	1	1	0	0	0	1		Q7SG46		g9618.t1
SET domain	IPR001214_PF00856	Cluster_12	0	0	0	0	0	0	2	0	0	0	0	1	1	0	0	1	1	1	2	2	0	0	1	0	0	0	1		Q7SBX0		g7524.t1
SET domain	IPR001214_PF00856	Cluster_13	0	0	0	0	0	0	0	0	0	0	0	1	0	1	0	0	1	1	1	1	1	1	1	0	0	0	1				g11599.t1
Zinc finger, TFIIS-type	IPR001222_PF01096	Cluster_1	1	1	1	1	1	1	1	1	1	1	1	1	1	1	1	1	1	1	1	1	1	0	1	1	1	2	1	P07273	Q7SHQ2	A2QEW8	g1759.t1
N-(5'phosphoribosyl) anthranilate isomerase (PRAI) like domain	IPR001240_PF00697	Cluster_1	1	0	0	0	0	1	1	1	1	1	1	1	1	1	1	1	1	1	1	1	1	1	1	1	1	1	1		P00908	A2QRH6	g12744.t1
Exoribonuclease, phosphorolytic domain 1	IPR001247_PF01138	Cluster_1	2	1	1	1	1	1	1	1	1	1	1	1	1	1	1	1	1	1	1	1	1	1	1	1	1	1	1	Q05636	Q7RZN0	A2QZD6	g8906.t1
Exoribonuclease, phosphorolytic domain 1	IPR001247_PF01138	Cluster_2	1	1	1	1	1	1	1	1	1	1	1	1	1	1	1	1	1	1	1	1	1	1	1	1	1	1	1	P46948	Q7SEC2	A2QP61	g3888.t1
Exoribonuclease, phosphorolytic domain 1	IPR001247_PF01138	Cluster_3	1	1	1	1	1	1	0	1	1	1	1	1	1	1	1	1	1	1	1	1	1	1	1	1	1	0	1	P48240	Q7SAL5	A2R617	g12837.t1
Exoribonuclease, phosphorolytic domain 1	IPR001247_PF01138	Cluster_4	0	1	1	1	1	1	1	1	1	1	1	1	1	1	1	0	1	1	1	1	1	1	1	0	0	0	1	Q12277	Q8X054	A2QC18	g13351.t1
Exoribonuclease, phosphorolytic domain 1	IPR001247_PF01138	Cluster_5	1	0	0	0	0	0	1	1	1	1	1	1	1	1	1	1	1	1	1	1	1	1	1	1	1	1	1		Q7SEX2	A2R0H9	g9730.t1
Exoribonuclease, phosphorolytic domain 1	IPR001247_PF01138	Cluster_6	1	1	0	1	1	1	0	0	0	0	0	1	1	1	1	1	1	1	1	1	1	1	1	0	1	2	1	P53256	Q7SEG0		g5676.t1
Mannose-6-phosphate isomerase, type I	IPR001250_PF01238	Cluster_1	1	1	1	1	1	1	1	2	1	1	1	1	1	1	1	1	1	1	1	1	1	1	1	1	1	1	1	P29952	Q870Y1	A2QRK4	g13770.t1
Mannose-6-phosphate isomerase, type I	IPR001250_PF01238	Cluster_2	0	0	0	0	0	0	0	1	1	1	2	1	1	0	1	1	2	0	1	1	1	1	1	0	0	0	1		Q7S4U2	A2QIE2	g5548.t1
CRAL-TRIO domain	IPR001251_PF00650	Cluster_2	2	2	1	2	2	1	1	1	1	1	1	1	1	1	1	1	1	1	1	1	2	1	1	2	2	1	1	P53860,P53844	Q8X0K2	A2R414	g11400.t1
CRAL-TRIO domain	IPR001251_PF00650	Cluster_3	0	1	1	1	2	1	1	1	1	1	1	1	1	1	1	1	1	1	1	1	1	1	1	2	2	4	1	P24280,P33324	Q7S5A2	A2R7H9	g1934.t1
CRAL-TRIO domain	IPR001251_PF00650	Cluster_4	0	0	0	0	0	0	1	2	2	2	2	1	1	1	1	1	2	2	2	1	1	1	1	1	0	0	1		Q7SA42	A2R6J7,A2QMY4	g3505.t1
CRAL-TRIO domain	IPR001251_PF00650	Cluster_5	0	0	0	1	0	1	1	1	1	1	1	1	1	1	1	1	1	1	1	1	1	2	1	0	0	0	1		Q7S4C1	A2QUR1	g3380.t1
Coproporphyrinogen III oxidase, aerobic	IPR001260_PF01218	Cluster_1	2	0	0	0	0	1	1	1	1	1	1	1	1	1	1	1	1	1	1	1	2	1	1	0	0	0	1		Q7RWY9	A2QPN3	g10347.t1
Phosphoinositide 3-kinase, accessory (PIK) domain	IPR001263_PF00613	Cluster_1	2	2	1	1	2	1	1	1	1	1	1	1	1	1	1	1	1	1	1	1	1	1	1	1	1	1	1	P39104,P37297	Q7SCR6	A2R164	g15518.t1
Phosphoinositide 3-kinase, accessory (PIK) domain	IPR001263_PF00613	Cluster_2	1	1	1	1	1	1	1	1	1	1	1	1	1	1	1	1	1	1	1	1	1	1	1	1	1	1	1	P22543	Q7SHZ6	A2QN92	g4888.t1
Ribosomal protein S19e	IPR001266_PF01090	Cluster_1	4	1	1	1	2	1	1	1	1	1	1	0	1	1	1	1	1	1	1	1	1	1	1	1	1	2	1	P07280,P07281	Q7SBD8	A2RAS4	g14178.t1
NADH:ubiquinone oxidoreductase, 30kDa subunit	IPR001268_PF00329	Cluster_1	1	1	1	1	0	1	1	1	1	1	1	1	1	1	1	1	1	1	1	1	1	1	1	1	1	1	1		P23710	A2QWS1	g5370.t1
tRNA-dihydrouridine synthase	IPR001269_PF01207	Cluster_1	1	1	1	1	1	1	1	1	1	1	1	1	1	1	1	1	1	1	1	1	1	1	1	1	1	1	1	P53720	Q7SGH2	A2QES0	g7014.t1
tRNA-dihydrouridine synthase	IPR001269_PF01207	Cluster_2	1	1	1	1	1	1	1	1	1	1	1	1	1	1	1	1	1	1	1	1	1	1	1	1	1	1	1	P53759	Q7RX85	A2QA98	g12921.t1
tRNA-dihydrouridine synthase	IPR001269_PF01207	Cluster_3	1	1	1	1	1	1	1	1	1	1	1	1	1	1	1	1	1	1	1	1	1	1	1	1	1	0	1	Q06053	Q7SG01	A2QAU6	g6545.t1
tRNA-dihydrouridine synthase	IPR001269_PF01207	Cluster_4	1	1	1	1	1	1	0	0	0	0	0	0	1	1	1	1	1	1	1	1	1	1	1	0	1	0	1	Q06063	Q7SGX4		g5920.t1
Phosphoenolpyruvate carboxykinase, ATP-utilising	IPR001272_PF01293	Cluster_1	2	1	1	1	1	1	1	1	1	1	1	1	1	1	1	1	1	1	1	1	1	1	1	1	1	1	1	P10963	Q7RVS9	A2QVT2	g1427.t1
Beta-lactamase-like	IPR001279_PF00753	Cluster_1	0	0	0	0	0	0	2	2	2	3	2	4	1	1	1	0	0	0	1	8	3	1	1	4	0	0	1		Q7S6B9	A2R6G2,A2QYS6	g8466.t1
Beta-lactamase-like	IPR001279_PF00753	Cluster_2	2	0	0	0	0	1	1	1	2	4	2	1	1	1	2	1	2	3	1	1	2	1	1	0	1	1	1		Q7S4V1	A2QSF3,A2QX23	g10016.t1
Beta-lactamase-like	IPR001279_PF00753	Cluster_3	1	1	1	1	2	1	1	1	1	1	1	1	1	1	1	1	1	1	1	1	1	1	1	1	1	1	1	Q05584,Q12320	Q9C2G8	A2R427	g3336.t1
Beta-lactamase-like	IPR001279_PF00753	Cluster_4	2	1	1	1	1	1	1	1	1	1	1	1	1	0	0	0	1	1	1	1	1	1	1	1	1	0	1	Q06224	Q8WZS6	A2QA44	g1577.t1
Beta-lactamase-like	IPR001279_PF00753	Cluster_6	1	0	0	0	0	0	0	2	2	1	2	1	2	0	1	1	1	2	1	1	1	1	1	1	0	0	1		Q7S664,Q7S992	A2QJI7,A2QM60	g6678.t1
CCAAT-binding transcription factor, subunit B	IPR001289_PF02045	Cluster_1	2	1	1	1	1	1	1	1	1	1	1	1	1	1	1	1	1	1	1	1	1	0	1	1	0	1	1	P06774	Q7SGY4	A5ABW3	g8289.t1
Glycosyl transferase, family 1	IPR001296_PF00534	Cluster_1	1	1	1	1	1	1	1	1	1	1	1	1	1	1	1	1	1	1	1	1	1	1	1	1	1	2	1	P43636	Q8X0H8	A2R3Y4	g1053.t1
Glycosyl transferase, family 1	IPR001296_PF00534	Cluster_2	1	1	1	1	1	1	1	1	1	1	1	1	1	1	1	1	1	1	1	1	1	1	1	1	1	1	1	P53954	Q8X092	A2RB90	g4439.t1
Glycosyl transferase, family 1	IPR001296_PF00534	Cluster_3	1	1	1	1	1	1	1	1	1	1	1	1	1	1	1	1	1	1	1	1	1	1	1	1	1	1	1	P32363	Q7S0W0	A2QA22	g1032.t1
Glycosyl transferase, family 1	IPR001296_PF00534	Cluster_5	2	0	0	0	0	0	1	1	1	1	1	1	1	1	1	1	1	1	1	1	1	1	0	1	0	0	1		Q7RVS4	A2QDN9
Glycosyl transferase, family 1	IPR001296_PF00534	Cluster_7	0	0	0	0	0	0	0	1	1	0	0	0	0	0	1	1	1	1	1	1	1	1	1	0	0	0	1			A2QA12	g5396.t1
Peptidase C2, calpain, catalytic domain	IPR001300_PF00648	Cluster_2	1	1	1	1	0	1	1	1	1	1	1	1	1	1	1	1	1	1	0	1	1	1	1	0	1	0	1		Q7RZP7	A2Q8K6	g12438.t1
Class II aldolase/adducin N-terminal	IPR001303_PF00596	Cluster_2	1	1	1	1	1	1	1	1	1	1	1	1	1	1	1	1	1	1	1	1	1	1	1	0	0	1	1	P47095	Q7SF46	A2Q9M4	g7021.t1
Heat shock protein DnaJ, cysteine-rich domain	IPR001305_PF00684	Cluster_1	4	1	1	1	1	1	1	1	1	1	1	1	1	1	1	1	1	1	1	1	1	1	1	2	1	1	1	P25491	Q7S1F9	A2Q8G7	g13026.t1
Heat shock protein DnaJ, cysteine-rich domain	IPR001305_PF00684	Cluster_2	0	1	1	1	1	1	0	1	1	1	1	1	1	0	1	1	1	1	1	1	1	1	1	1	1	1	1	P35191	Q7S9D6	A2QCJ3	g422.t1
Heat shock protein DnaJ, cysteine-rich domain	IPR001305_PF00684	Cluster_3	0	0	0	0	0	0	1	1	1	1	1	1	1	1	1	1	1	1	1	1	1	1	1	0	0	0	1		Q7RXY0	A2R654	g8503.t1
Heat shock protein DnaJ, cysteine-rich domain	IPR001305_PF00684	Cluster_4	0	0	0	0	0	0	1	1	1	1	1	1	0	1	1	1	1	1	1	1	1	1	1	0	0	0	1			A2QKP2	g6196.t1
Histidine triad (HIT) protein	IPR001310_PF01230	Cluster_1	1	1	1	1	1	0	1	0	1	1	1	1	1	1	1	1	1	1	1	1	1	1	1	2	1	1	1	Q04344	Q7S3H7	A2QLN7	g10028.t1
Histidine triad (HIT) protein	IPR001310_PF01230	Cluster_2	0	1	1	1	1	0	1	1	0	1	1	1	1	1	1	1	1	1	1	1	1	1	1	1	1	1	1	P49775	Q7SA92		g9042.t1
Histidine triad (HIT) protein	IPR001310_PF01230	Cluster_4	0	0	0	0	0	0	1	1	1	0	1	1	1	1	1	1	1	0	1	1	1	1	1	0	0	0	1		Q7RY54	A2Q9C6	g8813.t1
Pumilio RNA-binding repeat	IPR001313_PF00806	Cluster_1	3	2	2	2	1	1	1	1	1	1	1	1	1	1	1	1	1	1	1	1	1	1	1	1	1	0	1	P25339	Q8X035	A2Q8V4	g14943.t1
Pumilio RNA-binding repeat	IPR001313_PF00806	Cluster_2	3	1	1	1	2	0	1	1	1	1	1	1	1	1	1	1	1	1	1	1	1	1	1	1	1	1	1	P47135,Q12221	Q7SBC4	A2QFB4	g14889.t1
Pumilio RNA-binding repeat	IPR001313_PF00806	Cluster_3	4	1	1	1	1	1	1	1	1	1	1	1	1	1	1	1	1	1	1	1	1	1	1	1	0	1	1	Q07807	Q7RYG4	A2R4Q0	g12451.t1
Pumilio RNA-binding repeat	IPR001313_PF00806	Cluster_4	0	0	0	0	0	0	1	1	1	1	1	1	1	1	1	1	1	1	1	1	1	1	1	1	0	0	1		Q7RYJ9	A2QUU6	g4243.t1
Pyridine nucleotide-disulphide oxidoreductase, NAD-binding domain	IPR001327_PF00070	Cluster_4	3	2	1	1	1	1	1	1	1	1	1	1	1	1	1	1	1	1	1	1	1	1	1	4	1	1	1	P41921	Q873E8	A2QGK8	g4395.t1
Pyridine nucleotide-disulphide oxidoreductase, NAD-binding domain	IPR001327_PF00070	Cluster_5	1	1	1	1	2	1	1	1	1	1	1	1	1	1	1	1	1	1	1	1	1	1	1	1	1	1	1	P29509,P38816	P51978	A2Q9P0	g2740.t1
Pyridine nucleotide-disulphide oxidoreductase, NAD-binding domain	IPR001327_PF00070	Cluster_6	1	0	0	1	0	1	1	1	1	1	2	1	1	1	1	1	1	1	1	1	1	1	1	2	1	1	1		Q7RVX4	A2QXL0	g8951.t1
Pyridine nucleotide-disulphide oxidoreductase, NAD-binding domain	IPR001327_PF00070	Cluster_7	0	0	0	0	0	0	1	2	1	1	2	1	1	1	1	1	1	2	1	2	1	1	1	0	0	0	1		Q7S4Y9	A2Q9Y6	g1497.t1
Pyridine nucleotide-disulphide oxidoreductase, NAD-binding domain	IPR001327_PF00070	Cluster_8	1	0	0	0	0	0	1	1	1	1	1	1	1	1	1	1	1	1	1	1	1	1	1	1	1	1	1		Q7S558	A2QYA9	g4665.t1
Pyridine nucleotide-disulphide oxidoreductase, NAD-binding domain	IPR001327_PF00070	Cluster_13	0	0	0	0	0	0	3	1	0	1	0	0	0	0	1	1	0	1	1	3	1	1	1	0	0	0	1				g14570.t1
Pyridine nucleotide-disulphide oxidoreductase, NAD-binding domain	IPR001327_PF00070	Cluster_17	0	0	0	0	0	0	0	1	0	0	0	0	0	0	1	1	1	1	1	1	1	0	1	0	0	0	1				g9988.t1
Peptidyl-tRNA hydrolase	IPR001328_PF01195	Cluster_1	0	2	2	1	1	0	1	1	0	1	1	1	1	1	1	1	1	1	1	1	1	1	1	0	0	0	1	P38876	Q8X0D8		g15999.t1
Prenyltransferase/squalene oxidase	IPR001330_PF00432	Cluster_1	1	0	1	1	1	0	1	2	1	1	2	1	1	1	1	1	1	2	1	2	0	1	2	1	1	1	1	P38604	Q9P6Y6	A2QUR2	g5935.t1,g14575.t1
Prenyltransferase/squalene oxidase	IPR001330_PF00432	Cluster_2	1	1	0	1	1	1	1	1	1	1	1	1	1	1	1	1	0	0	1	1	1	0	1	1	1	5	1	P22007	Q7S2F7	A2QJD0	g10483.t1
Prenyltransferase/squalene oxidase	IPR001330_PF00432	Cluster_3	1	1	1	1	1	1	1	1	1	1	1	1	1	1	1	1	1	1	1	1	1	1	1	1	1	0	1	P20133	Q7SG33	A2R1F4	g2630.t1
Prenyltransferase/squalene oxidase	IPR001330_PF00432	Cluster_4	0	0	0	0	0	0	0	1	0	1	1	1	1	1	1	1	1	1	1	1	1	1	1	0	1	1	1		Q7S4G5		g3129.t1
mRNA capping enzyme	IPR001339_PF01331	Cluster_1	0	1	1	1	1	1	1	1	1	1	1	1	1	1	1	1	1	1	1	1	1	1	1	1	1	1	1	Q01159	Q7SB53	A2QFE4	g8497.t1
Homoserine dehydrogenase, catalytic	IPR001342_PF00742	Cluster_1	2	1	1	1	1	1	1	2	1	1	1	1	1	1	1	1	1	1	1	3	1	1	1	1	1	2	1	P31116	Q7RZC2	A2QDK6	g13116.t1
Sugar isomerase (SIS)	IPR001347_PF01380	Cluster_1	2	1	1	1	2	1	1	2	2	1	1	1	1	1	1	1	1	1	1	1	1	1	1	1	1	1	1	P14742,Q6B308	Q7S0B7	A2QH83,Q5YBF4	g5630.t1
Sugar isomerase (SIS)	IPR001347_PF01380	Cluster_2	1	1	1	1	0	1	1	1	1	1	1	1	1	0	1	1	1	1	1	1	2	1	1	0	1	0	1		Q7S049	A2QWV5	g14747.t1
Cytochrome c oxidase, subunit VIa	IPR001349_PF02046	Cluster_1	2	1	1	1	1	1	0	0	1	1	1	1	1	1	1	1	1	1	1	1	1	1	1	1	0	1	1	P32799	Q7SE96	A5ABR9	g7306.t1
Ribosomal protein S3, C-terminal	IPR001351_PF00189	Cluster_1	2	1	1	1	1	1	1	1	1	1	1	1	1	1	1	1	1	1	1	1	1	1	1	2	1	2	1	P05750	Q7RV52	A2RAI9	g12128.t1
Proteasome, subunit alpha/beta	IPR001353_PF00227	Cluster_1	2	1	1	1	1	1	1	1	1	2	1	1	1	1	1	1	1	1	1	1	1	1	1	1	1	1	1	P23724	Q7SCR7	A2RBH1	g15519.t1
Proteasome, subunit alpha/beta	IPR001353_PF00227	Cluster_2	2	1	1	1	1	1	1	1	1	1	1	1	1	1	1	1	1	1	1	1	1	1	1	1	1	2	1	P40302	Q86ZH0	A2R4I2	g4317.t1
Proteasome, subunit alpha/beta	IPR001353_PF00227	Cluster_3	2	1	1	1	1	1	1	1	1	1	1	1	1	1	1	1	1	1	1	1	1	1	1	1	1	1	1	P38624	Q7S0Q9	A2R1H1	g15303.t1
Proteasome, subunit alpha/beta	IPR001353_PF00227	Cluster_4	2	1	1	1	1	1	1	1	1	1	1	1	1	1	1	1	1	1	1	1	1	1	1	1	1	1	1	P30657	Q7S0B8	A2RBG9	g5629.t1
Proteasome, subunit alpha/beta	IPR001353_PF00227	Cluster_5	2	1	1	1	1	1	1	1	1	1	1	1	1	1	1	1	1	1	1	1	1	1	1	1	1	1	1	P21242	Q7SG71	A2RBI1	g600.t1
Proteasome, subunit alpha/beta	IPR001353_PF00227	Cluster_6	2	1	1	1	1	1	1	1	1	1	1	1	1	1	1	1	1	1	1	1	1	1	1	1	1	1	1	P30656	Q7SD84	A2QVK6	g5121.t1
Proteasome, subunit alpha/beta	IPR001353_PF00227	Cluster_7	2	1	1	1	1	1	1	1	1	1	1	1	1	1	1	1	1	1	1	1	1	1	1	1	1	1	1	P25451	Q7SEN9	A2QI02	g486.t1
Proteasome, subunit alpha/beta	IPR001353_PF00227	Cluster_8	2	1	1	1	1	1	1	1	1	1	1	1	1	1	1	1	1	1	1	1	1	1	1	1	1	1	1	P22141	Q9P6U7	A2QI09	g4321.t1
Proteasome, subunit alpha/beta	IPR001353_PF00227	Cluster_9	2	1	1	1	1	1	1	1	1	1	1	1	1	1	1	1	1	1	1	1	1	1	1	1	1	1	1	P23638	Q7S2D6	A2QWW7	g8049.t1
Proteasome, subunit alpha/beta	IPR001353_PF00227	Cluster_10	2	1	1	1	1	1	1	1	1	1	1	1	1	1	1	1	1	1	1	1	1	1	1	1	1	0	1	P21243	Q7S051	A5AA96	g263.t1
Proteasome, subunit alpha/beta	IPR001353_PF00227	Cluster_11	1	1	1	1	1	1	1	1	1	1	1	1	1	1	1	1	1	1	1	1	1	1	1	1	1	1	1	P25043	Q7SDF7	A2QWC0	g8269.t1
Proteasome, subunit alpha/beta	IPR001353_PF00227	Cluster_12	1	1	1	1	1	1	1	1	1	1	1	1	1	1	1	1	1	1	1	1	1	1	1	1	1	1	1	P23639	Q8X077	A2QMG4	g5837.t1
Proteasome, subunit alpha/beta	IPR001353_PF00227	Cluster_13	2	1	1	1	1	1	1	1	1	1	0	1	1	1	1	1	1	1	1	1	1	1	1	1	1	1	1	P40303	Q7RYX7	A2QEE5	g2020.t1
Proteasome, subunit alpha/beta	IPR001353_PF00227	Cluster_14	2	1	1	1	1	1	1	1	1	1	1	1	1	1	1	1	1	1	1	1	1	0	1	1	1	1	1	P32379	Q7S903	A2QCF6	g317.t1
Homeobox domain	IPR001356_PF00046	Cluster_2	15	1	1	1	1	1	1	1	1	1	1	1	1	1	1	1	1	1	1	1	1	1	1	3	2	1	1	P07269	Q7S7W0	A2QJD7	g11419.t1
Homeobox domain	IPR001356_PF00046	Cluster_4	0	1	1	1	2	1	1	1	1	0	1	1	1	1	1	1	1	1	1	1	1	1	0	0	0	0	1	Q04116,P34161	Q7SEG2	A2QDT7
Homeobox domain	IPR001356_PF00046	Cluster_5	0	0	0	0	0	0	1	1	1	0	1	1	1	1	0	1	1	3	1	1	1	1	1	0	0	0	1		Q7S2A5	A2R2F1	g14416.t1
Homeobox domain	IPR001356_PF00046	Cluster_6	0	0	0	0	0	0	1	1	1	1	1	0	1	1	1	1	1	1	1	1	1	1	1	0	0	0	1		Q7SDT9	A2QQH8	g13737.t1
Homeobox domain	IPR001356_PF00046	Cluster_7	0	0	0	0	0	0	0	0	0	0	0	0	1	1	1	1	1	1	1	1	0	0	1	0	0	0	1		Q7RYM8		g13821.t1
	IPR001357_PF00533	Cluster_1	1	1	1	1	1	1	1	1	1	1	1	1	1	1	1	1	1	1	1	1	1	1	1	1	1	1	1	P38630	Q7SCC0	A2QCP5	g5819.t1
	IPR001357_PF00533	Cluster_2	2	1	1	1	1	1	1	1	1	1	1	1	1	1	1	1	1	1	1	1	1	1	1	1	0	1	1	P53261	Q7SFC2	A2QI86	g2854.t1
	IPR001357_PF00533	Cluster_4	1	1	1	1	1	0	0	1	1	1	1	0	0	1	0	1	1	1	1	1	1	1	1	0	0	0	1	P38850		A2Q9E6	g5338.t1
	IPR001357_PF00533	Cluster_6	0	1	1	1	1	1	1	1	1	1	1	1	1	1	1	1	1	1	1	1	1	1	1	0	0	0	1	Q08387	Q7SB49	A2QGC2	g9874.t1
	IPR001357_PF00533	Cluster_10	0	0	0	0	0	0	0	0	0	0	0	0	0	0	1	1	1	1	1	1	0	1	0	0	0	0	1
	IPR001357_PF12738	Cluster_1	1	0	0	0	0	0	1	1	1	1	1	0	1	1	1	1	1	1	1	1	1	1	0	1	0	1	1		Q7S1I1	A2QDI6
	IPR001357_PF12738	Cluster_2	1	1	1	1	1	1	1	1	1	1	1	1	1	1	1	1	0	1	1	1	1	0	1	1	1	1	1	P38850	Q9P5J5	A2Q9E6	g5338.t1
	IPR001357_PF12738	Cluster_4	0	0	0	0	0	1	1	1	1	1	1	1	1	1	1	1	1	1	1	1	1	0	1	1	1	0	1		Q7S1G8	A2R3M9	g10664.t1
Glycoside hydrolase, family 1	IPR001360_PF00232	Cluster_2	0	0	0	0	0	0	0	1	1	1	1	1	0	1	0	2	1	1	1	1	0	0	1	0	0	0	1			A2QID8	g938.t1
Adenosine/AMP deaminase domain	IPR001365_PF00962	Cluster_2	2	1	1	1	3	1	1	1	1	1	1	1	1	1	2	2	1	1	1	1	1	1	1	1	1	1	1	P15274,P38150,P40361	Q7SH02	A2QHI4	g12911.t1
Adenosine/AMP deaminase domain	IPR001365_PF00962	Cluster_3	0	1	1	0	1	0	0	1	1	1	1	1	0	0	1	1	0	0	1	2	1	1	0	0	0	0	1	P53909		A2QZG1
Adenosine/AMP deaminase domain	IPR001365_PF00962	Cluster_4	0	0	0	0	0	0	1	1	1	1	0	1	1	0	1	1	1	1	1	1	1	1	0	0	0	0	1		Q7RXS1	A2QRJ6
Adenosine/AMP deaminase domain	IPR001365_PF00962	Cluster_5	0	0	0	0	0	0	0	3	1	0	1	1	0	0	1	0	1	1	1	2	1	1	0	0	0	0	1			A2R7A9
Baculoviral inhibition of apoptosis protein repeat	IPR001370_PF00653	Cluster_1	0	0	0	1	0	1	1	1	1	1	1	1	1	1	1	1	1	1	1	1	1	1	1	1	0	1	1		Q7S9P5	A2QAL1	g1164.t1
Dynein light chain, type 1/2	IPR001372_PF01221	Cluster_1	0	0	0	0	0	0	0	0	1	1	0	0	0	1	1	1	0	1	1	0	1	1	1	0	0	0	1			A2Q8B8	g15927.t1
Cullin, N-terminal	IPR001373_PF00888	Cluster_2	1	1	1	1	1	1	1	1	1	1	1	1	1	1	1	1	1	1	1	1	1	1	1	1	1	1	1	Q12440	Q7SE61	A2QWI1	g15057.t1
Single-stranded nucleic acid binding R3H	IPR001374_PF01424	Cluster_1	1	0	0	1	1	1	1	1	1	1	1	1	1	1	1	1	1	1	1	1	1	1	1	1	1	0	1	P53971	Q7SEF5	A2R1H4	g8672.t1
Single-stranded nucleic acid binding R3H	IPR001374_PF01424	Cluster_2	1	0	1	1	1	1	1	1	1	1	1	1	1	1	1	0	1	1	1	1	1	1	1	1	1	0	1	Q05672	Q9P746	A2QQ16	g12365.t1
Single-stranded nucleic acid binding R3H	IPR001374_PF01424	Cluster_3	0	0	0	0	0	0	1	1	1	1	1	1	1	1	1	1	1	1	1	1	1	1	1	1	1	1	1		Q7SC76	A2R701	g897.t1
Single-stranded nucleic acid binding R3H	IPR001374_PF01424	Cluster_4	1	0	0	0	0	0	0	1	0	1	1	1	1	1	1	1	1	1	1	1	1	1	1	0	1	1	1		Q7S3Y7		g9260.t1
Peptidase S9, prolyl oligopeptidase, catalytic domain	IPR001375_PF00326	Cluster_4	1	0	0	0	0	0	1	1	1	0	0	0	0	1	1	0	1	1	1	2	1	0	0	1	1	0	1			A2QIA7
Ribosomal protein S6e	IPR001377_PF01092	Cluster_1	0	0	0	0	0	0	0	0	0	0	0	0	1	1	1	1	1	1	1	1	1	0	1	0	0	0	1		Q7SC99		g15701.t1
Ribosomal protein L13e	IPR001380_PF01294	Cluster_1	0	0	0	0	0	0	0	0	0	0	0	0	1	0	0	1	1	1	1	1	1	1	1	0	0	0	1		Q7S709		g622.t1
Dehydroquinase class I	IPR001381_PF01487	Cluster_1	0	0	0	0	0	0	1	3	3	2	2	2	2	2	1	1	1	1	2	2	1	1	1	0	0	0	1		P11637,Q7RW62	A2QHG6,A2QQV9,A2QJS2	g1093.t1
Dehydroquinase class I	IPR001381_PF01487	Cluster_2	2	1	1	1	1	1	1	1	1	0	1	1	1	1	1	1	1	1	1	1	1	1	1	1	1	3	1	P08566	Q8X071	A2QRQ0	g13204.t1
Dehydroquinase class I	IPR001381_PF01487	Cluster_3	0	0	0	0	0	0	0	0	1	1	1	1	1	1	1	1	1	1	1	2	1	1	1	0	0	0	1		Q86ZG3	A2QHR6	g15340.t1
Glycoside hydrolase, family 47	IPR001382_PF01532	Cluster_2	1	1	1	1	1	1	1	1	1	2	1	1	1	1	1	1	1	1	1	1	2	1	1	3	1	1	1	P32906	Q7SE16	A2RBC3	g2115.t1
Glycoside hydrolase, family 47	IPR001382_PF01532	Cluster_3	1	1	1	1	1	1	1	1	1	1	2	2	1	1	1	1	1	1	1	1	1	1	1	1	0	2	1	P38888	Q7SCL9	A2QY83	g10224.t1
Glycoside hydrolase, family 47	IPR001382_PF01532	Cluster_4	0	0	0	0	0	0	1	1	1	1	1	2	1	2	1	1	2	2	2	1	1	0	1	1	1	2	1		Q7S6F6	A2QAS2	g15996.t1
Glycoside hydrolase, family 47	IPR001382_PF01532	Cluster_5	0	0	0	0	0	0	1	1	1	1	1	1	1	1	1	1	1	1	1	1	1	1	1	0	0	0	1		Q7S444	A2QLK0	g5488.t1
Ribosomal protein L28	IPR001383_PF00830	Cluster_1	0	1	1	1	1	1	1	1	1	1	1	1	1	0	1	1	1	1	1	1	1	1	1	0	0	0	1	P36525	Q7SC44	A2QJ62	g10333.t1
Synaptobrevin	IPR001388_PF00957	Cluster_1	2	1	1	1	1	1	1	1	1	1	1	1	1	1	1	1	1	1	1	2	1	1	1	1	1	2	1	P36015	Q7S2Z6	A2QJW3	g14246.t1
Synaptobrevin	IPR001388_PF00957	Cluster_2	0	1	1	1	2	2	1	1	1	1	1	1	1	1	1	1	1	1	1	1	1	1	1	1	1	2	1	P31109,P33328	Q7SF83	A2R067	g2406.t1
Synaptobrevin	IPR001388_PF00957	Cluster_3	1	1	1	1	1	1	1	1	1	0	1	1	1	1	1	1	1	1	1	1	1	1	1	1	1	1	1	P22214	Q871Q9	A2R4S0	g15988.t1
Synaptobrevin	IPR001388_PF00957	Cluster_4	1	0	0	1	0	1	1	1	1	1	1	1	1	1	1	1	0	0	1	1	1	1	1	1	1	1	1		Q7S9T6	A2QRW7	g3530.t1
Ubiquitin carboxyl-terminal hydrolases family 2	IPR001394_PF00443	Cluster_3	1	1	1	1	2	1	1	1	1	1	1	1	1	1	1	1	1	1	1	1	1	1	1	1	1	1	1	P38187,P39967	Q7SGN8	A2Q9N1	g11589.t1
Ubiquitin carboxyl-terminal hydrolases family 2	IPR001394_PF00443	Cluster_4	1	1	1	1	1	1	1	1	1	1	1	1	1	1	1	1	1	1	1	1	1	1	1	2	1	1	1	P38237	Q7S5R6	A2QFL7	g168.t1
Ubiquitin carboxyl-terminal hydrolases family 2	IPR001394_PF00443	Cluster_5	1	1	1	1	1	1	1	2	1	1	1	1	1	1	1	1	1	1	1	1	1	1	1	1	1	0	1	Q01476	Q7S587	A2QLI7	g7183.t1
Ubiquitin carboxyl-terminal hydrolases family 2	IPR001394_PF00443	Cluster_6	1	1	1	1	1	1	1	1	1	1	1	1	1	1	1	1	1	1	1	1	1	1	1	1	1	1	1	P43593	Q7SH87	A2R0E9	g15977.t1
Ubiquitin carboxyl-terminal hydrolases family 2	IPR001394_PF00443	Cluster_7	1	1	1	1	1	1	1	1	1	1	1	1	1	1	1	1	1	1	1	1	1	1	1	1	1	1	1	P43589	Q7S2B4	A2QI10	g1594.t1
Ubiquitin carboxyl-terminal hydrolases family 2	IPR001394_PF00443	Cluster_8	1	1	1	1	1	1	1	1	1	1	1	1	1	1	1	1	1	1	1	1	1	1	0	1	1	0	1	P50102	Q7S4V2	A2QLP0
Ubiquitin carboxyl-terminal hydrolases family 2	IPR001394_PF00443	Cluster_9	1	1	1	1	1	1	1	1	1	1	1	1	1	1	1	1	1	1	1	1	1	1	1	1	1	0	1	Q01477	Q7S728	A2QPK1	g14295.t1
Ubiquitin carboxyl-terminal hydrolases family 2	IPR001394_PF00443	Cluster_10	0	1	1	1	1	1	1	1	1	1	1	1	1	1	1	1	1	1	1	1	1	1	1	0	0	0	1	P25037	Q871P4	A2R3Q8	g7106.t1
Ubiquitin carboxyl-terminal hydrolases family 2	IPR001394_PF00443	Cluster_11	0	0	0	0	0	1	1	1	1	0	1	1	1	1	1	1	1	1	1	1	1	1	1	0	0	0	1		Q7S020	A2QDL2	g13495.t1
Dynamin, GTPase domain	IPR001401_PF00350	Cluster_4	2	1	1	1	1	1	1	1	1	1	1	1	1	1	1	1	2	1	1	1	1	1	1	1	1	1	1	P38297	Q7RXS3	A2R3N0	g13235.t1
Dynamin, GTPase domain	IPR001401_PF00350	Cluster_5	1	1	1	1	1	1	1	1	1	1	1	1	1	2	1	1	1	1	1	1	1	1	1	1	1	1	1	P32266	Q7S7E1	A2QQZ6	g3294.t1
Dynamin, GTPase domain	IPR001401_PF00350	Cluster_8	0	0	0	0	0	0	0	0	0	0	0	0	1	1	1	1	1	1	1	1	1	1	1	0	0	0	1		Q7S2E2		g6916.t1
Dynamin, GTPase domain	IPR001401_PF00350	Cluster_10	0	0	0	0	0	0	0	0	0	0	0	0	1	1	1	1	0	0	1	1	1	1	1	0	0	0	1		Q7SFU2		g2645.t1
Heat shock protein Hsp90 family	IPR001404_PF00183	Cluster_1	4	1	1	1	2	1	1	1	1	1	1	1	1	1	1	1	1	1	1	1	1	1	1	3	0	1	1	P15108,P02829	Q9C2E7	A2QUS2	g2783.t1
Superoxide dismutase, copper/zinc binding domain	IPR001424_PF00080	Cluster_1	0	2	3	2	0	1	1	1	1	1	0	2	2	2	1	1	2	2	1	1	1	1	1	0	0	7	1		Q7SEU1,Q9P3Q3	A2QQW0	g11367.t1
Superoxide dismutase, copper/zinc binding domain	IPR001424_PF00080	Cluster_2	4	1	1	1	1	1	1	1	1	1	2	1	1	1	1	1	1	1	1	2	1	1	1	1	0	0	1	P00445	P07509	A2QMY6	g9061.t1
Superoxide dismutase, copper/zinc binding domain	IPR001424_PF00080	Cluster_3	1	1	0	0	1	0	1	1	1	1	1	1	1	1	1	1	1	1	1	1	1	0	1	0	0	0	1	P40202	Q7SBV7	A2R818	g9436.t1
Rhodopsin, archaeal/bacterial/fungal	IPR001425_PF01036	Cluster_1	0	1	2	0	3	0	0	0	1	0	0	1	1	1	0	1	0	0	2	3	2	2	0	6	2	0	1	P25619,Q12117,P38079	Q9P530	A2QYR7
Oxidoreductase FAD/NAD(P)-binding	IPR001433_PF00175	Cluster_2	2	1	1	1	1	1	1	2	2	2	2	1	1	1	1	1	2	2	2	6	1	1	1	1	1	2	1	P16603	Q7SEI4	A2QKK3,A2QS05	g4181.t1
Oxidoreductase FAD/NAD(P)-binding	IPR001433_PF00175	Cluster_5	2	1	1	1	1	1	1	1	1	1	1	1	1	1	1	1	1	1	2	3	1	1	1	1	1	1	1	P38626	Q7RXL1	A2QCV4	g8496.t1
Oxidoreductase FAD/NAD(P)-binding	IPR001433_PF00175	Cluster_7	1	1	1	1	1	1	1	1	1	1	1	1	1	1	1	1	1	1	1	1	1	1	1	1	1	1	1	Q12181	Q7SEJ6	A2R9A9	g457.t1
Oxidoreductase FAD/NAD(P)-binding	IPR001433_PF00175	Cluster_8	1	1	1	1	1	1	1	1	1	1	1	1	1	1	1	1	1	1	1	1	1	1	1	1	1	0	1	P39692	Q7RZE3	A2QWW2	g13640.t1
Oxidoreductase FAD/NAD(P)-binding	IPR001433_PF00175	Cluster_9	1	1	1	1	1	1	1	1	1	1	1	1	1	1	1	1	1	1	1	1	1	1	1	0	0	0	1	P36060	Q7SFY2	A2Q898	g2658.t1
Oxidoreductase FAD/NAD(P)-binding	IPR001433_PF00175	Cluster_10	0	0	0	0	0	0	1	1	1	1	1	1	1	1	1	1	1	1	1	1	1	1	1	0	0	0	1		Q9HE34	A2QJG1	g8418.t1
Oxidoreductase FAD/NAD(P)-binding	IPR001433_PF00175	Cluster_11	0	0	0	0	0	0	0	1	1	1	1	0	1	0	0	0	0	1	1	1	1	1	1	0	0	0	1		Q7S875	A2R666	g12887.t1
Oxidoreductase FAD/NAD(P)-binding	IPR001433_PF00175	Cluster_12	0	0	0	0	0	0	0	1	1	0	0	0	1	1	1	1	0	0	1	1	1	1	0	0	0	0	1		Q86ZH8	A2QAM9
Tetratricopeptide TPR1	IPR001440_PF00515	Cluster_1	2	1	1	1	1	1	1	1	1	0	1	1	1	1	1	1	1	1	1	1	1	1	1	1	1	1	1	P14922	Q873D8	A2QCL0	g15022.t1
Tetratricopeptide TPR1	IPR001440_PF00515	Cluster_2	1	1	1	1	0	1	1	1	1	1	1	1	1	1	1	1	1	1	1	1	1	1	1	0	0	0	1		Q7S1X7	A2R730	g5499.t1
Tetratricopeptide TPR1	IPR001440_PF00515	Cluster_3	0	1	0	1	0	1	0	1	1	1	1	1	1	1	1	1	1	1	1	1	1	1	1	0	1	0	1		Q9HEI7	A5AAC4	g10493.t1
Tetratricopeptide TPR1	IPR001440_PF00515	Cluster_4	1	0	0	1	0	0	0	1	1	1	1	1	1	0	1	1	1	1	1	1	1	1	1	0	0	0	1		Q7SH09	A2R8K6	g868.t1
Tetratricopeptide TPR1	IPR001440_PF00515	Cluster_5	0	1	1	1	1	1	1	1	1	1	1	1	1	1	0	1	1	1	1	0	1	1	1	1	1	1	1	P15705	Q7SET2	A2QYC9	g15760.t1
Tetratricopeptide TPR1	IPR001440_PF00515	Cluster_6	1	0	0	0	0	1	1	1	1	1	1	0	1	1	0	0	1	1	1	1	1	1	1	1	0	2	1		P23231	A2QGX1	g4590.t1
Tetratricopeptide TPR1	IPR001440_PF00515	Cluster_7	0	0	1	0	0	0	0	0	0	0	0	1	1	1	0	1	1	1	1	0	1	1	1	1	1	1	1		O14428		g6799.t1
Tetratricopeptide TPR1	IPR001440_PF00515	Cluster_9	0	1	1	1	1	1	0	1	1	1	1	1	1	1	1	1	1	1	1	1	1	1	1	0	0	0	1	P16522	Q7S801	A5AAE2	g6357.t1
Tetratricopeptide TPR1	IPR001440_PF00515	Cluster_10	0	1	1	0	1	0	0	1	1	1	0	0	1	1	1	0	0	1	1	0	1	1	0	0	0	0	1	P89105	Q7RYN3	A2R9N2
Tetratricopeptide TPR1	IPR001440_PF00515	Cluster_12	0	0	0	0	0	1	1	1	1	1	1	1	1	1	1	1	1	1	1	1	1	1	1	1	1	1	1		Q9C286	A2Q8L4	g7541.t1
Tetratricopeptide TPR1	IPR001440_PF00515	Cluster_15	0	0	0	0	0	1	1	1	1	1	1	1	1	1	1	1	1	1	1	1	1	1	1	0	0	0	1		Q7RXL4	A2QZ82	g10968.t1
Tetratricopeptide TPR1	IPR001440_PF00515	Cluster_18	0	0	0	0	0	0	1	1	1	1	1	1	0	1	1	1	1	1	1	1	1	0	0	0	0	0	1			A2QQ87
Decaprenyl diphosphate synthase-like	IPR001441_PF01255	Cluster_1	1	2	2	2	2	2	1	2	1	1	1	1	1	1	1	1	1	1	1	1	1	1	1	1	1	2	1	P35196,Q03175	Q7RWJ5	A2QIZ3	g14839.t1
Decaprenyl diphosphate synthase-like	IPR001441_PF01255	Cluster_2	0	0	0	0	0	1	0	0	0	0	0	1	1	1	1	1	1	1	1	1	0	1	1	0	0	0	1		Q01391		g3803.t1
4Fe-4S binding domain	IPR001450_PF00037	Cluster_2	2	0	1	1	1	1	0	1	1	0	1	1	1	1	0	0	1	1	1	0	1	1	1	1	1	1	1	Q03195	Q7SD02	A2QQE2	g508.t1
Bacterial transferase hexapeptide repeat	IPR001451_PF00132	Cluster_3	1	2	2	1	1	0	0	1	1	1	1	1	0	0	1	0	0	1	1	1	1	1	1	1	2	1	1	P32501		A2QLL9	g13697.t1
Bacterial transferase hexapeptide repeat	IPR001451_PF00132	Cluster_4	0	1	1	0	0	1	1	0	0	1	0	1	1	1	1	1	1	1	0	1	0	1	1	1	0	1	1		Q871C1		g13755.t1
Bacterial transferase hexapeptide repeat	IPR001451_PF00132	Cluster_5	0	0	0	0	0	0	1	0	2	0	3	0	1	1	1	1	1	1	1	1	1	1	1	0	0	0	1		Q8WZV6	A2QLD7,A2R523	g827.t1
Bacterial transferase hexapeptide repeat	IPR001451_PF00132	Cluster_6	0	0	0	0	0	0	1	0	0	0	1	0	1	0	1	0	1	1	1	0	0	1	1	2	1	0	1		Q7SC49		g16052.t1
Bacterial transferase hexapeptide repeat	IPR001451_PF00132	Cluster_7	0	0	0	0	0	0	0	0	0	0	0	1	1	1	1	1	1	1	1	1	1	1	1	0	0	0	1		Q7RZH2		g15970.t1
Src homology-3 domain	IPR001452_PF00018	Cluster_2	2	1	1	1	1	1	1	1	1	1	1	1	1	1	1	1	1	1	1	1	1	1	1	1	1	3	1	P29366	Q7S9S2	A2R2H0	g3213.t1
Src homology-3 domain	IPR001452_PF00018	Cluster_3	2	1	1	1	2	1	1	1	1	1	1	1	1	1	1	1	1	1	1	1	1	0	1	0	2	1	1	P43603,P32793	Q7RZD9	A2QVV4	g8377.t1
Src homology-3 domain	IPR001452_PF00018	Cluster_4	0	0	1	0	1	0	0	0	0	1	1	0	0	0	1	1	1	1	1	0	0	1	1	1	1	2	1	P38822			g6202.t1
Src homology-3 domain	IPR001452_PF00018	Cluster_5	0	1	1	1	1	0	1	1	1	1	1	1	1	1	1	1	1	1	1	1	1	1	1	1	1	1	1	P39743	Q7S3B9	A2QU43	g13531.t1
Src homology-3 domain	IPR001452_PF00018	Cluster_7	0	1	1	1	1	1	1	1	1	1	1	1	1	1	1	1	1	1	1	1	1	1	1	1	1	1	1	P32790	Q7SH03	A2R8V2	g6623.t1
Src homology-3 domain	IPR001452_PF00018	Cluster_8	1	0	0	1	2	1	1	1	1	1	1	1	1	1	1	1	1	1	1	1	1	0	1	0	1	0	1	P36006,Q04439	Q7SDM3	A2R5J1	g13885.t1
Src homology-3 domain	IPR001452_PF00018	Cluster_11	0	0	0	0	1	1	1	1	1	1	1	1	1	1	1	1	1	1	1	1	1	1	1	0	0	0	1	P40073	Q7SGL6	A2QGW1	g2450.t1
Src homology-3 domain	IPR001452_PF00018	Cluster_12	0	0	0	1	0	1	1	1	1	1	1	1	1	1	1	1	1	1	1	0	1	1	1	1	1	0	1		Q7S690	A2R7N0	g239.t1
Src homology-3 domain	IPR001452_PF00018	Cluster_13	0	0	0	0	0	0	1	1	1	1	1	1	1	1	1	1	1	1	1	1	1	1	0	0	0	0	1		Q7SHV8	A2QEV3
Src homology-3 domain	IPR001452_PF00018	Cluster_14	0	0	0	0	0	0	1	1	1	1	1	0	1	1	1	0	1	1	1	1	1	1	0	0	0	0	1		Q7SFY1	A2QP53
Molybdopterin binding domain	IPR001453_PF00994	Cluster_1	1	1	1	1	1	1	1	1	1	1	1	1	1	1	1	1	1	1	1	1	1	1	0	1	1	1	1	Q03219	Q7S8Z1	A2Q7X8
Molybdopterin binding domain	IPR001453_PF00994	Cluster_2	1	0	0	1	0	0	1	2	1	1	2	1	1	1	1	1	1	1	1	1	1	1	1	1	1	0	1		Q7SEH9	Q58FL3	g1859.t1
Aspartic peptidase	IPR001461_PF00026	Cluster_4	3	1	1	1	1	1	1	2	1	1	1	1	1	1	1	1	1	1	1	1	1	1	1	1	1	1	1	P07267	Q01294	A2QDI4	g1988.t1
Aspartic peptidase	IPR001461_PF00026	Cluster_5	0	0	0	0	0	0	0	1	1	1	1	1	0	1	1	1	1	1	1	1	1	1	1	0	0	0	1			A5AAJ6	g10882.t1
Aspartic peptidase	IPR001461_PF00026	Cluster_8	0	0	0	0	0	0	0	0	0	0	0	0	1	1	1	0	1	1	1	1	1	1	1	0	0	0	1		Q7SEJ5		g456.t1
Aspartic peptidase	IPR001461_PF00026	Cluster_9	0	0	0	0	0	0	0	0	0	0	0	0	1	0	1	1	1	1	1	1	1	1	1	0	0	0	1		Q7S2N8		g10335.t1
Malate synthase	IPR001465_PF01274	Cluster_1	2	2	1	1	2	2	1	1	1	1	1	1	1	1	1	1	1	1	1	2	2	1	1	1	1	2	1	P30952,P21826	P28345	A2R4W7	g12472.t1
Beta-lactamase-related	IPR001466_PF00144	Cluster_5	0	0	0	0	0	0	0	1	1	2	1	0	0	0	1	1	1	2	1	5	1	0	0	0	0	0	1			A2R5P2
Bromodomain	IPR001487_PF00439	Cluster_2	2	1	1	1	1	1	2	1	2	1	2	1	0	2	1	1	2	1	1	2	1	1	1	1	1	1	1	Q03330		A2Q9K2,A2R3X4	g1751.t1
Bromodomain	IPR001487_PF00439	Cluster_3	2	2	2	2	2	2	1	1	0	1	1	1	1	1	1	1	1	1	1	1	1	1	1	1	1	1	1	P22082,P32597	Q7RYI6		g9475.t1
Bromodomain	IPR001487_PF00439	Cluster_4	1	1	1	1	2	1	1	0	1	1	1	1	1	1	1	1	1	1	1	1	1	1	1	1	1	1	1	P53236,Q06488	Q7S4X1	A2QY26	g7476.t1
Bromodomain	IPR001487_PF00439	Cluster_5	1	1	1	1	1	1	1	1	1	1	1	1	1	0	1	1	1	1	1	1	1	1	1	1	1	0	1	P35177	Q7S592	A2QDC6	g1989.t1
Bromodomain	IPR001487_PF00439	Cluster_6	0	0	0	0	0	0	0	1	1	1	1	1	1	1	1	1	1	1	1	1	1	1	1	0	0	0	1		Q7SC01	A2QCT4	g1019.t1
Bromodomain	IPR001487_PF00439	Cluster_7	0	0	0	0	0	0	1	0	0	0	1	1	1	1	1	1	1	1	1	1	1	1	1	0	0	0	1		Q7SEY6		g3453.t1
Importin-beta, N-terminal domain	IPR001494_PF03810	Cluster_1	3	2	2	2	2	1	1	1	1	1	1	1	1	1	1	1	0	0	1	1	1	1	1	1	1	1	1	P46970,Q04175	Q7SDN4	A2R7X1	g3371.t1
Importin-beta, N-terminal domain	IPR001494_PF03810	Cluster_2	1	1	1	1	1	0	1	1	1	1	1	1	1	1	1	1	1	1	1	1	1	1	1	1	1	1	1	Q06142	Q7SFM1	A2QB67	g2390.t1
Importin-beta, N-terminal domain	IPR001494_PF03810	Cluster_3	0	1	1	1	1	1	1	1	1	1	1	1	1	1	1	1	1	1	1	1	1	1	1	1	1	1	1	P33307	Q871I6	A2R4Q6	g9482.t1
Importin-beta, N-terminal domain	IPR001494_PF03810	Cluster_4	1	1	1	1	1	1	1	1	1	1	1	1	1	1	1	1	1	1	1	1	1	1	1	1	1	0	1	Q02932	Q7SEZ4	A2RAR7	g10227.t1
Importin-beta, N-terminal domain	IPR001494_PF03810	Cluster_5	2	1	1	1	1	0	1	1	1	1	1	0	1	1	1	1	1	1	1	1	1	1	1	1	1	1	1	P30822	Q7RWC2	A2QPT1	g15147.t1
Importin-beta, N-terminal domain	IPR001494_PF03810	Cluster_6	0	1	1	1	1	1	1	1	1	1	1	1	1	1	1	1	1	1	1	1	1	1	1	1	1	0	1	P53067	Q7S8N6	A2R603	g3234.t1
[truncated: 40,748 more rows]

## Sheet: Pfams
Name	InterproID	InterproID	InterproDescription	PfamId	Rhizopus_oryzae	Pichia_stipitis	Candida_albicans	Pichia_pastoris	Saccharomyces_cerevisiae	Yarrowia_lipolytica	Uncinocarpus_reesii	Aspergillus_oryzae	Aspergillus_niger	Aspergillus_nidulans	Penicillium_chrysogenum	Phaeosphaeria_nodorum	Neurospora_crassa	Magnaporthe_grisea	Trichoderma_reesei	Trichoderma_atroviride	Metarhizium_acridum	Metarhizium_anisopliae	Fusarium_graminearum	Nectria_haematococca	Glomerella_graminicola	Verticillium_dahliae	Scopulariopsis	Phanerochaete_chrysosporium	Ustilago_maydis	Puccinia_graminis	Other Sordatiomycetes median	Saccharomyces_cerevisiae_IDs	Neurospora_crassa_IDs	Aspergillus_niger_IDs	Scopulariopsis_IDs
MFS_1	IPR011701	IPR011701	Major facilitator superfamily	PF07690.11	89	98	63	43	44	111	104	374	309	263	281	257	102	168	162	243	175	213	245	444	262	191	221	123	73	39	202	P13090,P15365,P25351,P25594,P25596,P25621,P33335,P36032,P36172,P36173,P38124,P38125,P38227,P38358,P38724,P38776,P39709,P40445,P40474,P40475,P46996,P47159,P50080,P53241,P53283,P53322,P53389,P53918,P53943,Q03263,Q04301,Q04602,Q04991,Q06451,Q07376,Q07824,Q07904,Q08268,Q08280,Q08299,Q08777,Q08902,Q12235,Q12256	Q7RUS1,Q7RWQ6,Q7RX43,Q7RX92,Q7RY09,Q7RZ10,Q7RZ28,Q7RZ56,Q7RZ82,Q7RZB8,Q7RZQ8,Q7RZR6,Q7RZY5,Q7S080,Q7S0F5,Q7S0L9,Q7S0Q7,Q7S0T6,Q7S0V2,Q7S144,Q7S191,Q7S194,Q7S1R1,Q7S1X1,Q7S1Y9,Q7S238,Q7S243,Q7S269,Q7S282,Q7S2B0,Q7S2B1,Q7S2G5,Q7S2T6,Q7S2U8,Q7S343,Q7S359,Q7S3X1,Q7S441,Q7S4A3,Q7S4M0,Q7S509,Q7S511,Q7S524,Q7S546,Q7S5C1,Q7S5C9,Q7S5F6,Q7S6B2,Q7S6S0,Q7S6U7,Q7S6Y3,Q7S717,Q7S776,Q7S7L6,Q7S7S4,Q7S874,Q7S925,…	A2Q7D1,A2Q7D5,A2Q7E4,A2Q7M7,A2Q7N4,A2Q7P8,A2Q7Q8,A2Q7S9,A2Q7T8,A2Q7V3,A2Q7W1,A2Q7W3,A2Q8E9,A2Q8H8,A2Q8W8,A2Q927,A2Q978,A2Q9A0,A2Q9D9,A2Q9E3,A2Q9N8,A2Q9Q3,A2Q9Q9,A2Q9R2,A2Q9W6,A2Q9Y8,A2QA65,A2QAF2,A2QAG8,A2QAH5,A2QAI1,A2QAJ7,A2QAN7,A2QB48,A2QB97,A2QB98,A2QBB5,A2QBB8,A2QBD9,A2QBE9,A2QBG1,A2QBH2,A2QBJ6,A2QBP4,A2QBS9,A2QBW8,A2QC98,A2QCD5,A2QCH8,A2QCI3,A2QCQ8,A2QCS7,A2QD68,A2QDM0,A2QDU4,A2QE11,A2QEA4,…	g10354.t1,g10359.t1,g10360.t1,g10415.t1,g10418.t1,g10459.t1,g10544.t1,g10629.t1,g10675.t1,g10684.t1,g10704.t1,g10842.t1,g10850.t1,g10910.t1,g10917.t1,g11017.t1,g11049.t1,g11055.t1,g11165.t1,g1117.t1,g11233.t1,g1143.t1,g11500.t1,g11592.t1,g116.t1,g1177.t1,g11825.t1,g11962.t1,g12.t1,g12000.t1,g12063.t1,g12092.t1,g12121.t1,g12148.t1,g12222.t1,g12236.t1,g12310.t1,g12374.t1,g12489.t1,g12558.t1,g12567.…
Zn2-C6_fun-type_DNA-bd	IPR001138	IPR001138	Zn(2)-C6 fungal-type DNA-binding domain	PF00172.13	23	84	70	53	52	49	51	160	276	222	317	121	83	101	173	263	118	146	231	443	183	157	205	29	71	22	165	P04386,P05085,P07272,P08638,P12351,P12383,P21657,P25502,P25611,P26370,P32862,P33200,P34228,P35995,P36023,P38073,P38114,P38140,P38141,P38157,P38699,P38781,P39001,P39113,P39529,P39720,P39961,P40467,P40969,P40971,P42950,P43551,P43634,P46954,P47988,P50104,P52960,P53338,P53749,Q04052,Q04411,Q05854,Q05958,Q06149,Q06595,Q06639,Q08904,Q12151,Q12172,Q12180,Q12244,Q12340	O13360,P11638,P28349,P78704,P87000,Q7RV02,Q7RV19,Q7RW61,Q7RW91,Q7RWF1,Q7RWF9,Q7RXD3,Q7RXL0,Q7RXR4,Q7RXV3,Q7RY04,Q7RY88,Q7RZ17,Q7RZ83,Q7RZM1,Q7RZS5,Q7S052,Q7S0I0,Q7S117,Q7S1R3,Q7S248,Q7S2G2,Q7S2I8,Q7S2U2,Q7S379,Q7S3A5,Q7S3B2,Q7S3Q7,Q7S3X5,Q7S4Q6,Q7S563,Q7S6B3,Q7S6K8,Q7S6Q4,Q7S808,Q7S8Q1,Q7S8Q2,Q7S904,Q7S9C6,Q7S9K1,Q7S9N1,Q7SA81,Q7SA96,Q7SAG0,Q7SAH8,Q7SAJ9,Q7SAP0,Q7SAV4,Q7SC85,Q7SCN4,Q7SCY2,Q7SD75,…	A2Q7C5,A2Q7D4,A2Q7H1,A2Q7N2,A2Q7V2,A2Q808,A2Q882,A2Q974,A2Q999,A2Q9D0,A2Q9J1,A2Q9J2,A2Q9Y4,A2Q9Y9,A2QA08,A2QA36,A2QAC6,A2QAE9,A2QAF4,A2QAI3,A2QAN1,A2QAQ9,A2QAX1,A2QB02,A2QB26,A2QB49,A2QB62,A2QB86,A2QBE0,A2QBF6,A2QBG3,A2QBJ7,A2QBM2,A2QBT3,A2QC53,A2QC89,A2QCF8,A2QDI0,A2QDL7,A2QDP8,A2QDQ7,A2QDX4,A2QDY9,A2QE84,A2QEA6,A2QEF1,A2QF40,A2QF49,A2QF53,A2QF90,A2QFN4,A2QFT9,A2QG39,A2QG60,A2QG74,A2QGF1,A2QGH9,…	g10143.t1,g10187.t1,g10309.t1,g10489.t1,g105.t1,g10599.t1,g10830.t1,g1095.t1,g11022.t1,g1105.t1,g11135.t1,g11145.t1,g11242.t1,g11368.t1,g11406.t1,g11542.t1,g11642.t1,g11644.t1,g11687.t1,g1173.t1,g11746.t1,g11779.t1,g11787.t1,g11935.t1,g12021.t1,g12086.t1,g12091.t1,g12122.t1,g12156.t1,g12219.t1,g12413.t1,g12427.t1,g1255.t1,g12556.t1,g12562.t1,g12635.t1,g12653.t1,g12795.t1,g1280.t1,g12864.t1,g12888…
Transcription_factor_fun	IPR007219	IPR007219	Transcription factor domain, fungi	PF04082.13	40	47	29	24	26	22	59	211	259	198	208	122	69	83	132	204	122	137	189	383	153	144	213	42	39	19	140.5	P04386,P07272,P12383,P21657,P25502,P33200,P34228,P35995,P38114,P38157,P38699,P39113,P39529,P39961,P40467,P43551,P43634,P46974,P47988,P50104,P53338,Q06149,Q06595,Q08904,Q12139,Q12180	P11638,P28349,P87000,Q7RV19,Q7RW44,Q7RW91,Q7RWF1,Q7RXD3,Q7RXH2,Q7RXL0,Q7RXQ3,Q7RXV3,Q7RY04,Q7RYH2,Q7RZ83,Q7RZM1,Q7RZS5,Q7RZZ6,Q7S009,Q7S052,Q7S0L2,Q7S0T5,Q7S1R3,Q7S2B2,Q7S2G1,Q7S2U2,Q7S313,Q7S379,Q7S3A5,Q7S3X5,Q7S4Y2,Q7S6B3,Q7S6Q4,Q7S861,Q7S8Q1,Q7S8Q2,Q7S8U3,Q7S9G5,Q7S9K1,Q7S9N1,Q7S9X3,Q7SAG0,Q7SAH8,Q7SAJ9,Q7SAP0,Q7SC85,Q7SCY2,Q7SDB6,Q7SDJ7,Q7SEC6,Q7SEE8,Q7SFM0,Q7SFX4,Q7SFY4,Q7SGH7,Q7SHH0,Q7SHK8,…	A2Q7D4,A2Q7N2,A2Q808,A2Q837,A2Q847,A2Q974,A2Q999,A2Q9D1,A2Q9J1,A2Q9J2,A2Q9Y9,A2QA08,A2QA36,A2QAC6,A2QAE9,A2QAG0,A2QAK7,A2QAN1,A2QAQ9,A2QB02,A2QB26,A2QB49,A2QBA4,A2QBC1,A2QBC6,A2QBE0,A2QBG3,A2QBJ4,A2QBJ7,A2QBM2,A2QBS7,A2QBT3,A2QD84,A2QDP8,A2QDY9,A2QEA6,A2QEH3,A2QEL3,A2QF03,A2QF30,A2QF53,A2QFJ5,A2QFM0,A2QFN4,A2QFT9,A2QFY3,A2QG11,A2QG39,A2QG60,A2QGB3,A2QGF1,A2QGW5,A2QGW8,A2QH26,A2QH87,A2QHA9,A2QHC3,…	g10143.t1,g10187.t1,g10286.t1,g10440.t1,g105.t1,g10599.t1,g10632.t1,g10647.t1,g10712.t1,g1073.t1,g10830.t1,g10911.t1,g1095.t1,g11005.t1,g11022.t1,g11058.t1,g11135.t1,g11145.t1,g11242.t1,g11280.t1,g11340.t1,g11406.t1,g1153.t1,g11542.t1,g11596.t1,g11616.t1,g11642.t1,g11662.t1,g11687.t1,g11731.t1,g11779.t1,g11787.t1,g11792.t1,g11823.t1,g11935.t1,g12021.t1,g12156.t1,g12159.t1,g12244.t1,g12413.t1,g124…
Prot_kinase_cat_dom	IPR000719	IPR000719	Protein kinase domain	PF00069.20	302	96	95	94	114	81	168	130	143	108	179	146	104	114	118	127	166	146	119	183	107	131	122	150	92	120	123	P00546,P05986,P06242,P06243,P06244,P06245,P06782,P06784,P08018,P08458,P11792,P12688,P13185,P13186,P14680,P14681,P15442,P15790,P16892,P17157,P18961,P19454,P21965,P22204,P22209,P22211,P22216,P22219,P22517,P23291,P23292,P23293,P23561,P24583,P24719,P25333,P25341,P25389,P25390,P27466,P27636,P28708,P29295,P31374,P32328,P32350,P32361,P32485,P32490,P32491,P32562,P32581,P32801,P32944,P34244,P36002,P36003,…	O42626,O74297,P38679,P48479,P87253,Q7RUF4,Q7RVB3,Q7RVN1,Q7RVR1,Q7RVR4,Q7RVR5,Q7RVS8,Q7RVT8,Q7RVX6,Q7RVY6,Q7RWB9,Q7RX41,Q7RX99,Q7RYI8,Q7RYM0,Q7RYQ4,Q7RYY8,Q7RYZ3,Q7RYZ4,Q7RYZ6,Q7RZ48,Q7RZD3,Q7RZY1,Q7S031,Q7S089,Q7S0N6,Q7S162,Q7S1I3,Q7S1L5,Q7S2F1,Q7S2I4,Q7S2M5,Q7S326,Q7S3A6,Q7S434,Q7S470,Q7S4B6,Q7S4G0,Q7S622,Q7S698,Q7S6A6,Q7S6G1,Q7S6M3,Q7S8C5,Q7S8N1,Q7S8N2,Q7S9P0,Q7SAU1,Q7SAU4,Q7SB13,Q7SB90,Q7SBC1,…	A2Q8T0,A2Q941,A2Q9A3,A2Q9Y3,A2QA08,A2QA18,A2QA47,A2QAD3,A2QAE4,A2QAJ6,A2QAL9,A2QAQ3,A2QAV5,A2QB94,A2QBU9,A2QC16,A2QC46,A2QCJ0,A2QCP3,A2QD16,A2QD19,A2QD52,A2QDW3,A2QDX5,A2QE21,A2QEM4,A2QEW4,A2QFS5,A2QGQ1,A2QGW4,A2QGY8,A2QHM7,A2QHV0,A2QI62,A2QIJ8,A2QIL5,A2QJK6,A2QJT8,A2QJX3,A2QKG1,A2QKH9,A2QLG9,A2QM74,A2QN07,A2QN11,A2QN97,A2QNB6,A2QNC8,A2QNP3,A2QNW1,A2QP26,A2QQ43,A2QQ57,A2QQB2,A2QQM9,A2QQN3,A2QQP5,…	g10062.t1,g10066.t1,g10424.t1,g10536.t1,g10548.t1,g1055.t1,g10567.t1,g10725.t1,g10862.t1,g11119.t1,g11193.t1,g11380.t1,g11579.t1,g11716.t1,g11836.t1,g11863.t1,g11910.t1,g1228.t1,g12392.t1,g12415.t1,g12468.t1,g12520.t1,g12529.t1,g12555.t1,g12939.t1,g12969.t1,g13143.t1,g13186.t1,g13253.t1,g13541.t1,g13638.t1,g13762.t1,g13765.t1,g13829.t1,g14105.t1,g14191.t1,g14588.t1,g14705.t1,g14739.t1,g14822.t1,g…
WD40_repeat	IPR001680	IPR001680	WD40 repeat	PF00400.27	173	84	85	83	87	98	97	114	111	106	107	101	96	99	117	138	111	108	110	119	102	98	111	116	99	105	109	P07834,P11655,P13712,P16649,P18851,P20053,P20484,P21304,P25365,P25382,P25569,P25635,P26309,P26449,P32330,P32479,P33750,P35184,P36037,P36104,P36130,P38011,P38123,P38129,P38149,P38262,P38328,P38915,P38959,P38968,P39014,P39108,P39706,P39946,P39984,P40042,P40055,P40066,P40217,P40362,P40960,P40968,P41318,P41811,P42841,P42935,P43601,P46680,P47025,P50082,P53011,P53196,P53197,P53622,P53851,P53877,P53962,…	P78706,Q01277,Q01369,Q7RUZ4,Q7RVN5,Q7RWG8,Q7RWQ4,Q7RWW5,Q7RXH4,Q7RXM4,Q7RXR9,Q7RY30,Q7RY68,Q7RYI5,Q7RYJ1,Q7RZA3,Q7RZB7,Q7RZF5,Q7RZI0,Q7S028,Q7S0G9,Q7S199,Q7S1H9,Q7S1P4,Q7S1Y2,Q7S2D9,Q7S2K7,Q7S353,Q7S3D2,Q7S403,Q7S4E6,Q7S5P6,Q7S5Y4,Q7S7C3,Q7S7H8,Q7S7L4,Q7S7N3,Q7S7P1,Q7S8D5,Q7S8P4,Q7S8R5,Q7S900,Q7S9P0,Q7SA43,Q7SB08,Q7SBP2,Q7SBU5,Q7SCF4,Q7SCL0,Q7SCM7,Q7SCP8,Q7SCY1,Q7SDE7,Q7SDM2,Q7SDM9,Q7SE13,Q7SEI1,…	A2Q8G2,A2Q8Q4,A2Q8R6,A2Q8T5,A2Q912,A2Q933,A2Q9D2,A2Q9I6,A2Q9R8,A2QAM5,A2QAT6,A2QAU1,A2QB31,A2QB90,A2QBU0,A2QBY0,A2QBZ0,A2QCD9,A2QCM9,A2QCR3,A2QCU8,A2QD53,A2QDN2,A2QEQ9,A2QEV8,A2QFI0,A2QGV1,A2QGV2,A2QHM1,A2QI08,A2QI12,A2QI15,A2QI22,A2QIF4,A2QIK5,A2QIY6,A2QJ77,A2QJL5,A2QLJ7,A2QLM6,A2QMZ5,A2QN09,A2QNC3,A2QNE5,A2QP30,A2QP88,A2QPA1,A2QPB8,A2QPE3,A2QPL5,A2QPQ5,A2QPV6,A2QPW4,A2QPX4,A2QPZ4,A2QQ37,A2QQ83,…	g10107.t1,g10175.t1,g1025.t1,g10326.t1,g10529.t1,g10614.t1,g10762.t1,g10766.t1,g10815.t1,g10901.t1,g11388.t1,g11455.t1,g11987.t1,g12334.t1,g12394.t1,g12617.t1,g12630.t1,g12702.t1,g12793.t1,g13024.t1,g1315.t1,g13153.t1,g13220.t1,g13231.t1,g13647.t1,g13797.t1,g13906.t1,g14511.t1,g14715.t1,g14841.t1,g14963.t1,g15029.t1,g15065.t1,g15209.t1,g15309.t1,g1548.t1,g15590.t1,g15619.t1,g15621.t1,g15687.t1,g1…
Cyt_P450	IPR001128	IPR001128	Cytochrome P450	PF00067.17	49	10	11	4	3	17	42	154	145	119	99	146	37	133	72	68	91	118	113	160	146	68	79	137	20	17	102	P10614,P21595,P54781	Q7RUZ0,Q7RV13,Q7RVV0,Q7RWD1,Q7RWM0,Q7S0G0,Q7S0J5,Q7S0S8,Q7S0U0,Q7S1N3,Q7S1V4,Q7S330,Q7S3F8,Q7S3P0,Q7S429,Q7S4K3,Q7S534,Q7S559,Q7S560,Q7S5F1,Q7S683,Q7S811,Q7S8A1,Q7S8E0,Q7S8K7,Q7SAA4,Q7SCW8,Q7SD37,Q7SDI6,Q7SDQ4,Q7SEE6,Q7SFP7,Q7SGM1,Q872P5,Q9HFJ1,Q9P398,Q9P654	A2Q7D2,A2Q7F5,A2Q7H0,A2Q824,A2Q868,A2Q8X5,A2Q966,A2Q975,A2Q9Q2,A2QA07,A2QAK8,A2QBA0,A2QBE8,A2QBF9,A2QBI3,A2QCX7,A2QE00,A2QE51,A2QEF0,A2QEG0,A2QF47,A2QFB8,A2QFN6,A2QFS3,A2QGB4,A2QH38,A2QHD2,A2QHF8,A2QIB6,A2QJ58,A2QJF1,A2QJV1,A2QJV6,A2QJV9,A2QJW6,A2QK67,A2QKA0,A2QKK2,A2QKR5,A2QLB7,A2QLD1,A2QLV1,A2QLW1,A2QLW2,A2QLW5,A2QLW8,A2QLX8,A2QLZ5,A2QM23,A2QML8,A2QNP1,A2QPC1,A2QPL7,A2QPU0,A2QQ56,A2QQL3,A2QQU9,…	g10145.t1,g10146.t1,g10673.t1,g10676.t1,g10832.t1,g10936.t1,g11054.t1,g11066.t1,g1119.t1,g11222.t1,g11544.t1,g1156.t1,g1159.t1,g11735.t1,g11751.t1,g11756.t1,g11757.t1,g11799.t1,g11930.t1,g12256.t1,g12411.t1,g1251.t1,g1284.t1,g12897.t1,g1382.t1,g14299.t1,g14353.t1,g1463.t1,g15240.t1,g15567.t1,g15711.t1,g15877.t1,g15920.t1,g16105.t1,g16192.t1,g1658.t1,g194.t1,g2412.t1,g2427.t1,g2970.t1,g3579.t1,g36…
DH_sc/Rdtase_SDR	IPR002198	IPR002198	Short-chain dehydrogenase/reductase SDR	PF00106.20	23	25	20	14	13	27	42	120	132	122	108	133	52	89	108	155	66	80	121	230	113	94	86	67	38	26	101	P19097,P34251,P38286,P38342,P40471,P40579,P40580,P53878,Q02207,Q05016,Q06417,Q07530,Q08651	O42774,Q01373,Q7RV91,Q7RWA4,Q7RWP9,Q7RWX9,Q7RXR0,Q7RYE5,Q7RZD4,Q7RZQ9,Q7RZR2,Q7S1M9,Q7S2N5,Q7S2U0,Q7S3E8,Q7S4I6,Q7S4M1,Q7S6P4,Q7S6Q5,Q7S8G9,Q7S8I4,Q7S921,Q7S927,Q7S9T7,Q7SA13,Q7SAJ7,Q7SC08,Q7SC47,Q7SCP6,Q7SEJ0,Q7SF48,Q7SFE3,Q7SFL4,Q7SG84,Q7SGM6,Q7SGQ4,Q7SHA2,Q7SHE5,Q7SHI1,Q7SHI2,Q7SI45,Q870U5,Q871J8,Q872E5,Q872Z0,Q873D6,Q873F6,Q8X0F9,Q8X0H4,Q92247,Q9C2S1,Q9HE38	A2Q7J8,A2Q7K9,A2Q7Y1,A2Q864,A2Q967,A2Q9K1,A2Q9Y5,A2QA90,A2QAQ8,A2QAR9,A2QAZ6,A2QB60,A2QBI9,A2QBS8,A2QCH3,A2QEG3,A2QEP9,A2QEU2,A2QFQ6,A2QG00,A2QG78,A2QGA4,A2QGB2,A2QGE1,A2QGZ7,A2QHF7,A2QI99,A2QIH4,A2QIK6,A2QIN8,A2QJV4,A2QK54,A2QKA5,A2QKS3,A2QKV7,A2QL00,A2QL01,A2QLB4,A2QLD0,A2QLP6,A2QLV6,A2QM10,A2QM42,A2QME7,A2QMY1,A2QNS5,A2QP48,A2QPG4,A2QQB6,A2QQR5,A2QR30,A2QR41,A2QRA3,A2QRX3,A2QRY4,A2QS65,A2QT34,…	g101.t1,g10365.t1,g10754.t1,g10801.t1,g11298.t1,g1134.t1,g1136.t1,g11783.t1,g1187.t1,g1247.t1,g1256.t1,g12645.t1,g12853.t1,g1286.t1,g13083.t1,g13290.t1,g13295.t1,g1384.t1,g13977.t1,g13978.t1,g14034.t1,g14408.t1,g14409.t1,g14492.t1,g14518.t1,g14526.t1,g14986.t1,g15714.t1,g15861.t1,g15870.t1,g16257.t1,g2503.t1,g2603.t1,g2605.t1,g2607.t1,g2930.t1,g3041.t1,g3222.t1,g3534.t1,g3708.t1,g3912.t1,g3929.t1…
Sub_transporter	IPR005828	IPR005828	General substrate transporter	PF00083.19	39	49	37	21	35	34	29	127	109	114	116	93	41	71	64	80	63	61	113	207	92	96	107	34	24	21	75.5	P10870,P13181,P23585,P25297,P25346,P25594,P30605,P30606,P32465,P32466,P32467,P36035,P36172,P38142,P38156,P38695,P39003,P39004,P39924,P39932,P40885,P40886,P42833,P43562,P43581,P47185,P47186,P53048,P53142,P53631,P54854,P54862,Q04162,Q12300,Q12407	P11636,Q7RV14,Q7RVX9,Q7RWH1,Q7RXF1,Q7S0I5,Q7S0R2,Q7S2I7,Q7S2N0,Q7S3Q4,Q7S496,Q7S4B3,Q7S4D2,Q7S555,Q7S5F0,Q7S5U3,Q7S5X9,Q7S6M6,Q7S6W6,Q7S6X8,Q7S7L9,Q7S871,Q7S9G3,Q7S9U8,Q7SB47,Q7SBU8,Q7SC67,Q7SC74,Q7SCU1,Q7SD12,Q7SD36,Q7SEB3,Q7SEC5,Q7SHD8,Q870X7,Q871C4,Q871Y6,Q8WZY1,Q92253,Q9P3B9,Q9P732	A2Q7I4,A2Q7I7,A2Q8V8,A2Q9R1,A2QAC5,A2QAJ2,A2QBB1,A2QBE2,A2QBH4,A2QBM7,A2QC69,A2QCA1,A2QCH0,A2QDM3,A2QDP7,A2QDQ0,A2QDS9,A2QDT4,A2QDY2,A2QEH1,A2QEI9,A2QG25,A2QG38,A2QG79,A2QH24,A2QHL9,A2QIA1,A2QIP5,A2QJL7,A2QJR8,A2QK98,A2QKC2,A2QKK1,A2QKM7,A2QKT1,A2QKZ6,A2QL46,A2QL81,A2QLB0,A2QLB6,A2QLQ1,A2QLS6,A2QLT8,A2QLZ3,A2QM92,A2QM97,A2QMG9,A2QML5,A2QN52,A2QN96,A2QNT0,A2QP27,A2QPR6,A2QQ95,A2QQV6,A2QQX4,A2QR39,…	g1.t1,g10190.t1,g10438.t1,g10525.t1,g10681.t1,g10869.t1,g10924.t1,g1097.t1,g11000.t1,g11061.t1,g11065.t1,g111.t1,g11295.t1,g11619.t1,g11669.t1,g11685.t1,g11726.t1,g11731.t1,g11785.t1,g11997.t1,g12116.t1,g12423.t1,g1243.t1,g1283.t1,g1298.t1,g1300.t1,g13259.t1,g1331.t1,g13316.t1,g13370.t1,g13440.t1,g13525.t1,g136.t1,g13685.t1,g13926.t1,g14327.t1,g14360.t1,g14366.t1,g14394.t1,g14524.t1,g15125.t1,g15…
Helicase_C	IPR001650	IPR001650	Helicase, C-terminal	PF00271.26	84	54	60	58	73	61	66	78	73	68	72	77	69	73	71	73	68	74	70	85	74	69	70	61	65	152	72	O13559,P06634,P10081,P15424,P15938,P20095,P20447,P20448,P20449,P21372,P22082,P23394,P24088,P24384,P24783,P24784,P25808,P31244,P31380,P32333,P32580,P32597,P32639,P32657,P32849,P32863,P32892,P35187,P35207,P36009,P36120,P38086,P38112,P38144,P38712,P38719,P39517,P40105,P40352,P40434,P40562,P40889,P43538,P43610,P45818,P47047,P51979,P53115,P53131,P53166,P53327,P53345,P53734,P53819,Q00578,Q03099,Q03532,…	P0C2N8,Q7RV88,Q7RVS3,Q7RXE8,Q7RXH5,Q7RY59,Q7RYD5,Q7RYI6,Q7RYX9,Q7RYZ7,Q7RZ29,Q7RZ35,Q7RZ50,Q7RZH4,Q7S0U4,Q7S0W1,Q7S133,Q7S159,Q7S1P9,Q7S1Z7,Q7S2N9,Q7S5D9,Q7S5P1,Q7S5R1,Q7S600,Q7S6F3,Q7S6P9,Q7S7G9,Q7S7H0,Q7S806,Q7S873,Q7S8J7,Q7S8K0,Q7S8T9,Q7S9J4,Q7S9T5,Q7S9U1,Q7SAB3,Q7SAC4,Q7SAR3,Q7SBC6,Q7SBC8,Q7SBI2,Q7SBR1,Q7SCC1,Q7SD03,Q7SDF3,Q7SDG4,Q7SEL0,Q7SF56,Q7SFC8,Q7SFQ7,Q7SGC1,Q7SH33,Q7SH44,Q7SHE9,Q7SI21,…	A2Q7H9,A2Q8J1,A2Q8R2,A2Q9T6,A2Q9U8,A2Q9V0,A2QA23,A2QAB5,A2QAX7,A2QAZ0,A2QB33,A2QC42,A2QC74,A2QC88,A2QCW6,A2QE29,A2QEN5,A2QES1,A2QF74,A2QFL3,A2QGK3,A2QHB0,A2QHT9,A2QI25,A2QIL2,A2QKI0,A2QP62,A2QPZ8,A2QQA8,A2QQE1,A2QRG3,A2QRY2,A2QS00,A2QSB2,A2QSF7,A2QTI7,A2QUH2,A2QUY7,A2QWC5,A2QWW0,A2QWZ3,A2QX45,A2QY39,A2QY71,A2QZ71,A2QZH2,A2R0B5,A2R176,A2R2K5,A2R2S0,A2R345,A2R365,A2R3A8,A2R3B8,A2R3C2,A2R3C3,A2R4P8,…	g10113.t1,g1020.t1,g10258.t1,g10659.t1,g10905.t1,g11510.t1,g11682.t1,g11762.t1,g11890.t1,g12383.t1,g12456.t1,g13030.t1,g13098.t1,g13677.t1,g13939.t1,g14108.t1,g1417.t1,g14269.t1,g14377.t1,g14581.t1,g15204.t1,g15299.t1,g15471.t1,g16220.t1,g170.t1,g192.t1,g2020.t1,g2179.t1,g2261.t1,g2979.t1,g3502.t1,g3528.t1,g3699.t1,g3733.t1,g384.t1,g4067.t1,g414.t1,g4221.t1,g4320.t1,g4393.t1,g4683.t1,g4841.t1,g50…
AMP-dep_Synth/Lig	IPR000873	IPR000873	AMP-dependent synthetase/ligase	PF00501.23	39	11	10	7	10	19	43	78	75	66	58	58	27	54	38	53	53	67	62	54	45	40	40	45	31	12	53	P07702,P30624,P38137,P38225,P39002,P39518,P47912,P52910,Q01574,Q12275	P16929,Q7RW48,Q7RWW3,Q7RWZ6,Q7RXZ8,Q7RY33,Q7RZ92,Q7RZX2,Q7S2S5,Q7S4F3,Q7S4Y7,Q7S557,Q7S6D3,Q7S7A6,Q7S7F6,Q7S7K3,Q7SC49,Q7SDM6,Q7SDW1,Q7SG79,Q7SHX6,Q7SI43,Q872S0,Q8X0Y1,Q9HEI8,Q9P3Q7,Q9P5I9	A2Q968,A2QAJ8,A2QAK0,A2QAX9,A2QBD5,A2QBI9,A2QBQ2,A2QCE9,A2QCX5,A2QDU0,A2QF28,A2QFT0,A2QGJ5,A2QH58,A2QH90,A2QHV2,A2QIQ3,A2QIQ8,A2QJ10,A2QJ30,A2QJ93,A2QK86,A2QKJ0,A2QKQ9,A2QLH0,A2QLH9,A2QLI1,A2QLX4,A2QMV4,A2QND1,A2QPE7,A2QQF1,A2QQV0,A2QQX9,A2QR54,A2QRH8,A2QRV7,A2QT17,A2QT24,A2QTD4,A2QTE5,A2QUC0,A2QUT7,A2QW87,A2QWK3,A2QWU2,A2QXP6,A2QYG7,A2QYT6,A2QYW5,A2QYX4,A2R037,A2R0W7,A2R143,A2R1U4,A2R200,A2R2T7,…	g10572.t1,g11234.t1,g1154.t1,g12101.t1,g12565.t1,g12932.t1,g13240.t1,g13361.t1,g1337.t1,g13652.t1,g14204.t1,g14537.t1,g14576.t1,g1473.t1,g1500.t1,g1502.t1,g15121.t1,g16052.t1,g16123.t1,g16160.t1,g16240.t1,g21.t1,g2281.t1,g4017.t1,g4316.t1,g4467.t1,g4617.t1,g4851.t1,g5523.t1,g5578.t1,g5814.t1,g6263.t1,g659.t1,g6596.t1,g7081.t1,g7722.t1,g8056.t1,g8399.t1,g8474.t1,g8860.t1
DUF3468	IPR021858	IPR021858	Protein of unknown function DUF3468	PF11951.3	0	16	12	5	5	13	23	79	90	68	82	46	14	28	49	81	47	55	75	160	57	44	63	2	4	0	52	P05085,P26370,P40971,Q05958,Q12151	P78704,Q7RVZ6,Q7S0I0,Q7S186,Q7S4P8,Q7S4Q6,Q7S563,Q7S904,Q7S9Q1,Q7SCN4,Q872C0,Q96TZ3,Q9C2N3,Q9P326	A2Q7H1,A2Q7W2,A2Q865,A2Q925,A2QAI3,A2QB62,A2QBF6,A2QC89,A2QCF8,A2QDI0,A2QDQ7,A2QDT0,A2QDU6,A2QDX4,A2QE84,A2QEF1,A2QF49,A2QG13,A2QG74,A2QH55,A2QH96,A2QHD7,A2QHP5,A2QI42,A2QIM9,A2QIT9,A2QJ91,A2QJK5,A2QJR9,A2QJV7,A2QKQ8,A2QKZ7,A2QMD3,A2QMD6,A2QMP8,A2QNB2,A2QPB0,A2QPH0,A2QQ51,A2QQ69,A2QQJ7,A2QQL2,A2QS51,A2QT22,A2QT86,A2QUA8,A2QVF3,A2QW63,A2QWJ1,A2QX53,A2QXG8,A2QYF3,A2QYU1,A2QZ15,A2QZQ9,A2R003,A2R079,…	g10489.t1,g1075.t1,g1105.t1,g1141.t1,g1173.t1,g11746.t1,g12086.t1,g12094.t1,g12101.t1,g12864.t1,g12928.t1,g13147.t1,g13518.t1,g13572.t1,g14008.t1,g14120.t1,g14399.t1,g14774.t1,g15234.t1,g15285.t1,g1534.t1,g16189.t1,g2060.t1,g2141.t1,g2519.t1,g2572.t1,g2603.t1,g2816.t1,g3021.t1,g318.t1,g3351.t1,g3355.t1,g3591.t1,g3624.t1,g3633.t1,g4739.t1,g4836.t1,g4934.t1,g4981.t1,g5047.t1,g5410.t1,g5428.t1,g5588…
ABC_transporter-like	IPR003439	IPR003439	ABC transporter-like	PF00005.22	48	31	28	28	30	32	33	83	63	50	54	49	34	51	46	47	51	57	62	76	60	48	50	51	39	27	51	P12866,P14772,P16521,P25371,P32386,P32568,P33302,P33310,P33311,P34230,P36028,P38735,P39109,P40024,P40416,P40550,P41909,P43535,P43569,P51533,P53049,P53756,P53978,Q02785,Q03195,Q04182,Q08234,Q08409,Q08972,Q12298	Q7RVU0,Q7RVV4,Q7RX59,Q7RY95,Q7RZG5,Q7RZJ1,Q7RZS4,Q7S0E4,Q7S0J7,Q7S0L1,Q7S0S1,Q7S0X8,Q7S1R2,Q7S1X2,Q7S2E6,Q7S6X2,Q7S770,Q7S8I2,Q7S940,Q7S9G5,Q7S9Z6,Q7SCP7,Q7SD02,Q7SD69,Q7SF27,Q7SGM7,Q7SGQ7,Q7SGU1,Q7SHS0,Q871I0,Q872I6,Q872R8,Q9C229,Q9P6C3	A2Q8A9,A2Q8C9,A2Q976,A2Q9Q5,A2QA30,A2QAQ5,A2QCV9,A2QGB1,A2QGG4,A2QGJ0,A2QGK5,A2QGP8,A2QGY0,A2QGY9,A2QIJ0,A2QJH1,A2QJU9,A2QKR4,A2QKW5,A2QKW8,A2QL42,A2QLV3,A2QM91,A2QMM5,A2QN01,A2QPE5,A2QQE2,A2QQF3,A2QQQ1,A2QR22,A2QR58,A2QRA7,A2QRB6,A2QRE9,A2QSG1,A2QSX9,A2QT53,A2QTD5,A2QVP0,A2QX64,A2QX68,A2QYZ9,A2QZA4,A2QZP3,A2R1T1,A2R202,A2R253,A2R307,A2R321,A2R374,A2R3A2,A2R4F3,A2R4P4,A2R4X2,A2R524,A2R573,A2R5R6,…	g10134.t1,g10356.t1,g10574.t1,g10709.t1,g11411.t1,g12430.t1,g12900.t1,g12942.t1,g13193.t1,g13480.t1,g1360.t1,g13603.t1,g14012.t1,g14094.t1,g14125.t1,g1436.t1,g14546.t1,g14954.t1,g15283.t1,g15451.t1,g15674.t1,g16029.t1,g1720.t1,g1905.t1,g2062.t1,g2594.t1,g2652.t1,g2950.t1,g3035.t1,g392.t1,g438.t1,g508.t1,g5111.t1,g5515.t1,g5569.t1,g5720.t1,g5803.t1,g6318.t1,g655.t1,g704.t1,g7256.t1,g7581.t1,g7629.…
ADH_GroES-like	IPR013154	IPR013154	Alcohol dehydrogenase GroES-like	PF08240.7	22	21	19	13	16	15	24	88	99	57	67	60	26	48	43	81	38	54	52	114	59	48	58	46	21	10	50	P00330,P00331,P07246,P25377,P28625,P32771,P35183,P35497,P38113,P38230,P39713,P39714,P39945,Q04894,Q07786,Q07993	Q7RV37,Q7RWP0,Q7RY77,Q7RZ31,Q7RZV3,Q7S0Q5,Q7S0R4,Q7S0T8,Q7S1U8,Q7S3S7,Q7S492,Q7S6L2,Q7S994,Q7S9B3,Q7SAC7,Q7SC51,Q7SFE0,Q7SG88,Q7SHA1,Q7SHI6,Q7SHZ7,Q7SI09,Q871W3,Q872V8,Q8X0U5,Q9P6C8	A2Q7G5,A2Q7L3,A2Q7Q7,A2Q7V0,A2Q889,A2Q977,A2QAN5,A2QBA8,A2QBC7,A2QBG7,A2QC27,A2QCA7,A2QDU2,A2QE52,A2QF02,A2QFL5,A2QFZ8,A2QGX9,A2QH06,A2QH11,A2QHC4,A2QHC9,A2QI91,A2QIR8,A2QKA4,A2QKB6,A2QKZ5,A2QL21,A2QLQ6,A2QM86,A2QM95,A2QNV6,A2QQU5,A2QQV3,A2QS17,A2QT49,A2QT95,A2QTF1,A2QU04,A2QUE2,A2QUN8,A2QUV3,A2QUX4,A2QV03,A2QV09,A2QW33,A2QW54,A2QW77,A2QW89,A2QWP3,A2QWP6,A2QWP8,A2QWS3,A2QWU0,A2QXC4,A2QXH2,A2QY67,…	g10048.t1,g10279.t1,g10538.t1,g10757.t1,g10831.t1,g11185.t1,g11225.t1,g11240.t1,g11284.t1,g11359.t1,g11847.t1,g12410.t1,g12441.t1,g1269.t1,g12937.t1,g12940.t1,g13305.t1,g13916.t1,g13980.t1,g13983.t1,g14289.t1,g14368.t1,g14494.t1,g14545.t1,g14594.t1,g15273.t1,g15719.t1,g16132.t1,g16210.t1,g2.t1,g2843.t1,g3152.t1,g3497.t1,g3647.t1,g3816.t1,g3922.t1,g3954.t1,g4093.t1,g4515.t1,g4538.t1,g5533.t1,g5763…
ATPase_AAA_core	IPR003959	IPR003959	ATPase, AAA-type, core	PF00004.24	48	31	32	32	32	31	37	43	45	40	43	52	40	50	48	53	42	46	49	60	48	41	40	39	28	30	48	P18759,P24004,P25694,P28737,P31539,P32794,P32795,P32839,P33297,P33298,P33299,P33416,P33760,P36775,P38126,P38629,P38630,P39925,P39955,P40151,P40327,P40328,P40339,P40340,P40341,P40348,P49956,P52917,P53549,P54784,Q01939,Q07844	P31540,Q7RVB2,Q7RVQ0,Q7RY87,Q7RYJ0,Q7RZ60,Q7S0H4,Q7S1H1,Q7S2J5,Q7S2N1,Q7S328,Q7S4D9,Q7S545,Q7S7X0,Q7S7Z2,Q7S8C4,Q7S8H3,Q7S9F4,Q7SA49,Q7SA85,Q7SAQ2,Q7SCC0,Q7SD08,Q7SDI0,Q7SDQ8,Q7SFI0,Q7SFX3,Q7SGP2,Q7SGT9,Q7SH04,Q7SH42,Q872Q7,Q873H3,Q8X056,Q9C2I8,Q9HDH1,Q9P389,Q9P5J9,Q9P5S3,Q9P665	A2Q7X2,A2Q904,A2QAB3,A2QAZ7,A2QBY4,A2QCJ2,A2QCP5,A2QDI2,A2QE04,A2QER5,A2QEZ6,A2QG20,A2QIW5,A2QJ18,A2QK32,A2QK40,A2QLM2,A2QMH8,A2QMM8,A2QN57,A2QNF6,A2QNU0,A2QPZ5,A2QQR8,A2QW49,A2QW59,A2QX09,A2R2A1,A2R2B7,A2R2I7,A2R2T3,A2R4F8,A2R5D4,A2R6X9,A2R722,A2R785,A2R7C1,A2R7V4,A2R8Y8,A2R964,A2RAF6,A2RB25,A2RBC4,A5AB97,Q9C455	g10077.t1,g1040.t1,g10505.t1,g11673.t1,g12066.t1,g12914.t1,g13118.t1,g13350.t1,g13356.t1,g14120.t1,g14555.t1,g15379.t1,g1544.t1,g15551.t1,g1882.t1,g1940.t1,g2177.t1,g2622.t1,g349.t1,g3651.t1,g3735.t1,g3826.t1,g3947.t1,g399.t1,g4138.t1,g4212.t1,g4513.t1,g5819.t1,g6471.t1,g6611.t1,g6989.t1,g7267.t1,g7618.t1,g844.t1,g8583.t1,g8866.t1,g9243.t1,g9269.t1,g949.t1,g9681.t1
ADH_C	IPR013149	IPR013149	Alcohol dehydrogenase, C-terminal	PF00107.21	26	22	20	13	17	15	23	91	104	65	69	65	26	43	41	78	42	48	59	127	64	46	62	53	22	11	47	P00330,P00331,P07246,P25377,P25608,P32771,P35497,P38113,P38230,P39713,P39714,P53912,P54007,Q03102,Q04894,Q07786,Q07993	Q7RV37,Q7RWC7,Q7RWP0,Q7RY77,Q7RZ31,Q7RZV3,Q7S0Q5,Q7S0R4,Q7S0T8,Q7S2T5,Q7S380,Q7S571,Q7S6L2,Q7S994,Q7S9B3,Q7SAC7,Q7SC51,Q7SFE0,Q7SG88,Q7SHA1,Q7SHZ7,Q7SI09,Q871W3,Q872V8,Q8X0U5,Q9P6C8	A2Q7C2,A2Q7G5,A2Q7L3,A2Q7Q7,A2Q7V0,A2Q889,A2Q977,A2QAN5,A2QBA8,A2QBC7,A2QBG7,A2QBL3,A2QC27,A2QCA7,A2QDU2,A2QE52,A2QF02,A2QFL5,A2QFZ8,A2QGX9,A2QH06,A2QH11,A2QHC4,A2QHC9,A2QI91,A2QIR8,A2QKA4,A2QKB6,A2QKZ5,A2QL21,A2QLQ6,A2QM86,A2QM95,A2QNV6,A2QQU5,A2QQV3,A2QS17,A2QT73,A2QT95,A2QTF1,A2QTF6,A2QU04,A2QUE2,A2QUV3,A2QUX4,A2QV03,A2QV09,A2QW33,A2QW54,A2QW77,A2QW89,A2QWL0,A2QWP6,A2QWP8,A2QWU0,A2QXC4,A2QXH2,…	g10048.t1,g10279.t1,g10538.t1,g10692.t1,g10757.t1,g10831.t1,g11185.t1,g11225.t1,g11240.t1,g11284.t1,g11292.t1,g11359.t1,g11847.t1,g12410.t1,g12441.t1,g1269.t1,g12937.t1,g12940.t1,g13305.t1,g13916.t1,g13980.t1,g14048.t1,g14289.t1,g14368.t1,g14397.t1,g14494.t1,g14542.t1,g14545.t1,g14594.t1,g15273.t1,g15719.t1,g16210.t1,g2.t1,g2843.t1,g3152.t1,g3497.t1,g3647.t1,g3816.t1,g3922.t1,g3954.t1,g3969.t1,g4…
HET	IPR010730	IPR010730	Heterokaryon incompatibility	PF06985.6	0	0	0	0	0	0	1	42	32	10	8	164	52	39	43	87	27	36	95	285	51	33	27	2	0	0	47		Q7RUZ5,Q7RUZ6,Q7RV26,Q7RV34,Q7RV40,Q7RW24,Q7RW98,Q7RWA5,Q7RWB3,Q7RXE1,Q7S0B1,Q7S0N7,Q7S0Y5,Q7S125,Q7S126,Q7S146,Q7S190,Q7S1K1,Q7S1M5,Q7S1T8,Q7S1W4,Q7S2N5,Q7S2T0,Q7S2T8,Q7S320,Q7S3V5,Q7S4B2,Q7S5K3,Q7S5X3,Q7S660,Q7S6A5,Q7S6H1,Q7S6K0,Q7S8I4,Q7S8N1,Q7S9Q7,Q7SA49,Q7SAC6,Q7SAM2,Q7SAR8,Q7SAV5,Q7SBG0,Q7SC89,Q7SCF8,Q7SDN1,Q7SF07,Q872X1,Q8X006,Q8X0I2,Q9P3A3,Q9P3H4,Q9UV10	A2Q7E8,A2Q7T3,A2Q7W0,A2QBC4,A2QBU6,A2QDB4,A2QF15,A2QGH1,A2QGH5,A2QIS7,A2QLJ1,A2QN42,A2QNC0,A2QR48,A2QUG8,A2QV26,A2QWV2,A2QXC0,A2QXD4,A2QXJ3,A2QYH9,A2QYW7,A2QYY0,A2QZM4,A2QZN7,A2R3X6,A2R5M4,A2R5N2,A2R5R3,A2R7F2,A2RAB3,A2RAL9	g10316.t1,g10358.t1,g10377.t1,g10627.t1,g11028.t1,g11083.t1,g11722.t1,g14534.t1,g15141.t1,g15934.t1,g255.t1,g2993.t1,g2994.t1,g4470.t1,g4580.t1,g5385.t1,g5441.t1,g5449.t1,g5805.t1,g5982.t1,g5983.t1,g6845.t1,g7054.t1,g7120.t1,g9104.t1,g9473.t1,g9533.t1
RRM_dom	IPR000504	IPR000504	RNA recognition motif domain	PF00076.17	89	39	32	45	41	47	42	47	53	52	52	47	46	51	44	48	44	44	43	44	49	43	50	38	48	62	44	P04147,P06103,P10080,P25299,P25555,P27476,P32385,P32588,P32605,P32831,P32843,P33399,P34761,P36036,P37838,P38741,P38760,P38922,P38996,P39684,P40561,P47135,P49960,P53316,P53617,P53883,P53927,Q00539,Q00916,Q01560,Q04067,Q06106,Q07655,Q08208,Q08920,Q08925,Q12046,Q12159,Q12221,Q99181,Q99383	Q7RUX3,Q7RVN7,Q7RYW0,Q7RZB6,Q7RZE6,Q7S0E6,Q7S1F3,Q7S1V1,Q7S2L7,Q7S301,Q7S480,Q7S583,Q7S6F4,Q7S6N6,Q7S6V1,Q7S7B0,Q7S8Q6,Q7SA91,Q7SAJ5,Q7SAK7,Q7SAS0,Q7SB15,Q7SBA6,Q7SBC4,Q7SBX5,Q7SCZ4,Q7SDG9,Q7SE84,Q7SEI3,Q7SEQ7,Q7SET9,Q7SF93,Q7SFW1,Q7SFZ5,Q7SG09,Q7SG96,Q7SH10,Q871A4,Q871T2,Q873L8,Q8X042,Q8X0N0,Q9C222,Q9HE95,Q9HEH4,Q9P3I2	A2Q848,A2Q8B7,A2Q8P7,A2QAK3,A2QB77,A2QEE4,A2QEY4,A2QF41,A2QFB4,A2QFD1,A2QFI7,A2QGV0,A2QGV7,A2QHP3,A2QHQ4,A2QLJ3,A2QMH2,A2QMQ0,A2QMQ9,A2QNC4,A2QNE2,A2QPL8,A2QQ26,A2QQN9,A2QQZ9,A2QS03,A2QUS1,A2QUT3,A2QVN5,A2QWS2,A2QXZ4,A2QY90,A2QY98,A2QZF7,A2R166,A2R2A2,A2R2Q5,A2R3N8,A2R3S3,A2R664,A2R7D2,A2R7G1,A2R7K8,A2R7W8,A2R7Z2,A2R8K5,A2R8X0,A2R974,A2R9C2,A2RAA3,A5AAI7,A5ABQ2,A5ABV7	g10395.t1,g10816.t1,g10891.t1,g10964.t1,g11379.t1,g12144.t1,g12285.t1,g12812.t1,g12833.t1,g13112.t1,g13401.t1,g13802.t1,g14757.t1,g14889.t1,g15157.t1,g15911.t1,g15928.t1,g15945.t1,g16135.t1,g1616.t1,g16173.t1,g2228.t1,g2711.t1,g3110.t1,g4039.t1,g4179.t1,g455.t1,g4673.t1,g4705.t1,g4734.t1,g4858.t1,g5184.t1,g5368.t1,g5652.t1,g5838.t1,g5918.t1,g5922.t1,g6241.t1,g7013.t1,g7566.t1,g7649.t1,g7704.t1,g8…
DNA/RNA_helicase_DEAD/DEAH_N	IPR011545	IPR011545	DNA/RNA helicase, DEAD/DEAH box type, N-terminal	PF00270.24	55	35	41	39	55	41	41	45	48	45	47	48	43	44	42	44	44	51	45	51	42	41	44	41	48	117	44	O13559,P06634,P10081,P15424,P15938,P20095,P20447,P20448,P20449,P21372,P23394,P24088,P24384,P24783,P24784,P25808,P32639,P32892,P35187,P35207,P36009,P36120,P38112,P38712,P38719,P38721,P38899,P39517,P40105,P40434,P40889,P43538,P45818,P47047,P51979,P53131,P53166,P53327,P53345,P53734,P53819,Q03099,Q03532,Q04217,Q05549,Q06218,Q06698,Q07478,Q07888,Q08995,Q12099,Q12389,Q3E7X8,Q3E7Y5,Q99208	P0C2N8,Q7RV88,Q7RXE8,Q7RY59,Q7RYD5,Q7RYZ7,Q7RZ35,Q7RZH4,Q7S0U4,Q7S0W1,Q7S2N9,Q7S5D9,Q7S5P1,Q7S5R1,Q7S600,Q7S6F3,Q7S806,Q7S873,Q7S8K0,Q7S9J4,Q7S9U1,Q7SAB3,Q7SBC6,Q7SBR1,Q7SCC1,Q7SDF3,Q7SDG4,Q7SEL0,Q7SFC8,Q7SFQ7,Q7SGC1,Q7SH33,Q7SH44,Q7SHE9,Q871L2,Q873H9,Q873J5,Q8NJW1,Q8X0X2,Q9HED9,Q9P5Z6,Q9P6U9,Q9P735	A2Q7H9,A2Q8J1,A2Q8R2,A2Q9T6,A2QA23,A2QAB5,A2QAX7,A2QC74,A2QC88,A2QCW6,A2QE29,A2QEN5,A2QF74,A2QFL3,A2QI25,A2QIL2,A2QKI0,A2QKK4,A2QPZ8,A2QQA8,A2QRY2,A2QS00,A2QUY7,A2QWC5,A2QWW0,A2QX45,A2QY39,A2QZ71,A2QZH2,A2R0B5,A2R2S0,A2R345,A2R365,A2R3A8,A2R3C2,A2R4P8,A2R634,A2R7X2,A2R8R8,A2RA55,A2RAF3,A2RAH0,A2RAP7,A2RB17,A5AA68,A5AAE5,A5AAL0,A5AAL6	g1020.t1,g10258.t1,g10905.t1,g11682.t1,g11762.t1,g11890.t1,g12383.t1,g12456.t1,g13030.t1,g13039.t1,g13098.t1,g13939.t1,g14108.t1,g14269.t1,g14377.t1,g170.t1,g2179.t1,g2979.t1,g3502.t1,g3699.t1,g3733.t1,g4067.t1,g414.t1,g4221.t1,g4320.t1,g4683.t1,g5637.t1,g5834.t1,g5891.t1,g5967.t1,g6205.t1,g6228.t1,g6730.t1,g6901.t1,g6996.t1,g782.t1,g8149.t1,g8537.t1,g8831.t1,g8897.t1,g9216.t1,g9420.t1,g9775.t1,g…
mOase_FAD-bd	IPR002938	IPR002938	Monooxygenase, FAD-binding	PF01494.14	10	7	4	2	2	2	13	69	68	64	39	51	21	35	29	44	37	44	44	90	45	20	42	34	9	8	40.5	P38169,P53318	Q7RXC5,Q7RZ12,Q7RZZ7,Q7S066,Q7S0V5,Q7S1U9,Q7S3C9,Q7S4H7,Q7S5W2,Q7S617,Q7S681,Q7S8D7,Q7SA02,Q7SA73,Q7SBF8,Q7SBN0,Q7SC27,Q7SGZ3,Q7SHH9,Q7SHS8,Q8X0B1	A2Q998,A2Q9N3,A2Q9N7,A2QAK1,A2QBS4,A2QCY4,A2QFQ5,A2QFR9,A2QG02,A2QG17,A2QG19,A2QG69,A2QG73,A2QG91,A2QGH7,A2QGL9,A2QGW7,A2QH23,A2QH37,A2QHC5,A2QHD6,A2QHF5,A2QIT8,A2QJK2,A2QKW1,A2QL52,A2QM25,A2QMA0,A2QMA8,A2QMF1,A2QMH1,A2QNH1,A2QPD9,A2QRP1,A2QS13,A2QT25,A2QT31,A2QTE7,A2QTH7,A2QU51,A2QVS5,A2QVY4,A2QVZ3,A2QW45,A2QWH1,A2QX24,A2QYP7,A2QZ02,A2QZS2,A2R051,A2R0Y2,A2R125,A2R1J5,A2R2X6,A2R379,A2R3A9,A2R4Y8,…	g10088.t1,g10782.t1,g1138.t1,g1142.t1,g1147.t1,g11677.t1,g11739.t1,g11754.t1,g11813.t1,g11828.t1,g1257.t1,g13365.t1,g1348.t1,g13728.t1,g13902.t1,g13921.t1,g14038.t1,g14506.t1,g14995.t1,g15126.t1,g15776.t1,g15893.t1,g187.t1,g189.t1,g2425.t1,g3326.t1,g3931.t1,g4531.t1,g4996.t1,g563.t1,g5758.t1,g59.t1,g6589.t1,g6853.t1,g6882.t1,g7047.t1,g7724.t1,g7914.t1,g8016.t1,g921.t1,g9400.t1,g9854.t1
Mitochondrial_sb/sol_carrier	IPR018108	IPR018108	Mitochondrial substrate/solute carrier	PF00153.22	64	34	33	34	34	38	35	43	38	38	42	42	36	38	36	38	40	43	41	49	42	38	38	35	36	33	39	P04710,P10566,P18238,P18239,P23500,P23641,P32331,P32332,P33303,P38087,P38127,P38152,P38702,P38921,P38988,P39953,P40035,P40464,P40556,P43617,P48233,P53257,P53320,Q03028,Q03829,Q04013,Q06143,Q06497,Q07534,Q12251,Q12289,Q12375,Q12482,Q99297	P02723,P0C582,Q01356,Q7RWK9,Q7RXJ3,Q7RZP8,Q7S114,Q7S2H8,Q7S4D6,Q7S4S8,Q7S4X3,Q7S597,Q7S6J8,Q7S8I9,Q7S952,Q7S9Z1,Q7SA63,Q7SAV0,Q7SB09,Q7SCR2,Q7SD41,Q7SH90,Q7SHF8,Q86ZI2,Q871K0,Q871V0,Q8WZW4,Q8WZW8,Q96U08,Q96U23,Q9C2K1,Q9HE62,Q9HE83,Q9HE96,Q9P5U2,Q9P691	A2Q8K7,A2Q9F0,A2QB22,A2QBZ4,A2QCN5,A2QCY9,A2QEH5,A2QES4,A2QFX4,A2QGI0,A2QGZ4,A2QHH2,A2QHR2,A2QHV6,A2QJZ5,A2QK17,A2QLM1,A2QMP1,A2QMR7,A2QPN0,A2QPR8,A2QQ59,A2QQA3,A2QSF6,A2QUT0,A2QUU1,A2QVT1,A2QY41,A2QZH4,A2R2T2,A2R479,A2R5A0,A2R5Z0,A2R9S9,A2RAE3,A2RAS8,A2RB57,A5ABV8	g10103.t1,g10323.t1,g1063.t1,g11387.t1,g11758.t1,g1198.t1,g12097.t1,g12437.t1,g12799.t1,g13297.t1,g13908.t1,g13961.t1,g14109.t1,g1433.t1,g1452.t1,g15042.t1,g15963.t1,g1951.t1,g2335.t1,g2618.t1,g3309.t1,g4044.t1,g4634.t1,g4658.t1,g4707.t1,g5476.t1,g5827.t1,g5857.t1,g6190.t1,g6244.t1,g6619.t1,g6910.t1,g727.t1,g74.t1,g7450.t1,g769.t1,g9273.t1,g9708.t1
Oxid_FAD_bind_N	IPR006094	IPR006094	FAD linked oxidase, N-terminal	PF01565.18	4	5	5	3	4	3	12	54	46	46	35	57	22	37	27	41	22	28	44	71	37	32	35	14	8	7	34.5	P32891,P39976,P46681,P54783	Q7RV07,Q7RWM5,Q7RYX6,Q7S0U1,Q7S1N4,Q7S1P7,Q7S350,Q7S352,Q7S4K5,Q7S6F1,Q7S915,Q7S9A7,Q7SB35,Q7SCE5,Q7SCV2,Q7SE05,Q7SGY1,Q7SHH7,Q7SHH8,Q8NIW9,Q8X0G1,Q9P6Z1	A2Q7F3,A2Q7P2,A2Q9P6,A2QAE2,A2QAH0,A2QBA2,A2QBC5,A2QBL4,A2QBP2,A2QDR0,A2QFR3,A2QFW6,A2QGI9,A2QH13,A2QH89,A2QHB3,A2QIR4,A2QL34,A2QMJ7,A2QN48,A2QRI7,A2QS26,A2QS48,A2QT98,A2QTA3,A2QTE6,A2QTF5,A2QUX1,A2QW39,A2QWN7,A2QX39,A2QXI4,A2QXM7,A2QY53,A2QZV2,A2R023,A2R340,A2R352,A2R4X5,A2R5H1,A2R9X1,A2RAG6,A2RBM3,A5AAH4,A5ABF8,A5ABH0	g10820.t1,g10858.t1,g1108.t1,g11611.t1,g11625.t1,g1270.t1,g1276.t1,g12883.t1,g13121.t1,g1353.t1,g13818.t1,g13987.t1,g14595.t1,g2039.t1,g2476.t1,g2901.t1,g3716.t1,g3719.t1,g3939.t1,g4122.t1,g4534.t1,g5413.t1,g5751.t1,g5941.t1,g6015.t1,g6580.t1,g7210.t1,g7510.t1,g7519.t1,g7889.t1,g7999.t1,g8189.t1,g8202.t1,g8204.t1,g9035.t1
Acyl_carrier_prot-like	IPR009081	IPR009081	Acyl carrier protein-like	PF00550.20	10	3	3	3	2	3	20	59	70	47	43	33	13	33	26	42	40	59	35	28	47	20	19	11	12	3	34	P07702,P32463	P11943,Q7RW48,Q7RWC7,Q7RY33,Q7S0T8,Q7S380,Q7S6D3,Q7S736,Q7SC21,Q7SC49,Q7SHI6,Q872S0,Q9P3Q7	A2Q973,A2Q977,A2QAJ8,A2QAK0,A2QAM2,A2QBI9,A2QBL3,A2QBQ2,A2QCX5,A2QDU0,A2QFT0,A2QG45,A2QGJ5,A2QH06,A2QH36,A2QH58,A2QH90,A2QHV2,A2QIQ4,A2QIQ8,A2QJ10,A2QJ93,A2QK66,A2QKB6,A2QKQ9,A2QLH9,A2QM71,A2QQF0,A2QQF1,A2QQV0,A2QR54,A2QT17,A2QT24,A2QTD4,A2QTE9,A2QTF6,A2QTH2,A2QUC0,A2QUI2,A2QUW6,A2QW54,A2QW87,A2QW90,A2QWK3,A2QWP6,A2QWU2,A2QX22,A2QXP7,A2QYQ2,A2QYW3,A2QYX4,A2R022,A2R037,A2R0W7,A2R143,A2R1U4,A2R200,…	g10572.t1,g1181.t1,g12932.t1,g13622.t1,g13652.t1,g14542.t1,g14576.t1,g1502.t1,g15719.t1,g16052.t1,g21.t1,g3407.t1,g3969.t1,g5523.t1,g659.t1,g7081.t1,g7443.t1,g8056.t1,g8206.t1
Peptidase_S8/S53	IPR000209	IPR000209	Peptidase S8/S53 domain	PF00082.17	24	4	5	6	4	17	23	7	15	6	6	18	10	29	24	54	37	54	30	36	28	20	12	13	5	17	29.5	P09232,P13134,P25036,P25381	Q7RZV0,Q7S0X5,Q7S1D2,Q7S4Z5,Q7S8P7,Q7SBZ0,Q7SCG1,Q7SGV0,Q7SHY0,Q870Y6	A2Q7S3,A2Q9N6,A2QCA5,A2QFW4,A2QMZ7,A2QR36,A2QTZ2,A2QVE4,A2R2N5,A2R2Q0,A2R2Z3,A2R746,A2R888,A2RAB7,A2RB01	g10132.t1,g11130.t1,g11868.t1,g13133.t1,g14715.t1,g2468.t1,g2706.t1,g3179.t1,g4081.t1,g5739.t1,g7278.t1,g86.t1
NADP_OxRdtase_dom	IPR023210	IPR023210	NADP-dependent oxidoreductase domain	PF00248.16	18	17	17	7	13	17	16	43	39	36	33	26	18	23	28	37	26	24	31	55	30	33	28	53	15	12	29	P14065,P25612,P38115,P38715,P42884,P47137,P47182,Q02895,Q04212,Q06494,Q07551,Q07747,Q12458	Q7RWA6,Q7RWY1,Q7RY53,Q7S1L2,Q7S1P6,Q7S2E8,Q7S2K8,Q7S3U4,Q7S6W9,Q7S8R6,Q7SD67,Q7SHA0,Q7SHH4,Q7SHL7,Q872E2,Q9C2J8,Q9P6D3,Q9P734	A2Q8B5,A2Q981,A2Q9Z0,A2QB88,A2QBD7,A2QBG6,A2QBJ9,A2QF69,A2QGU8,A2QI89,A2QIH8,A2QJ06,A2QKC0,A2QL02,A2QLA2,A2QLX3,A2QN65,A2QNX0,A2QPQ8,A2QQ75,A2QQ97,A2QQD9,A2QRL3,A2QU21,A2QU22,A2QVE5,A2QWC8,A2QWS8,A2QYV4,A2R1B7,A2R5G3,A2R5L9,A2R5N3,A2R6Z3,A2R6Z8,A2R757,A2R7U3,A2R971,A5ABB4	g10756.t1,g11665.t1,g11991.t1,g12755.t1,g12891.t1,g13308.t1,g13989.t1,g14316.t1,g14362.t1,g16077.t1,g1717.t1,g18.t1,g227.t1,g2610.t1,g3353.t1,g3634.t1,g3921.t1,g4471.t1,g5861.t1,g6324.t1,g7022.t1,g7863.t1,g7895.t1,g8548.t1,g8812.t1,g9052.t1,g9243.t1,g9637.t1
AcTrfase_GCN5-related_dom	IPR000182	IPR000182	GNAT domain	PF00583.19	14	8	11	8	11	20	23	22	25	23	26	35	14	23	30	35	22	27	38	49	32	24	27	12	14	6	28.5	P07347,P35208,P39979,P43577,Q02908,Q03503,Q04751,Q06504,Q06592,Q08689,Q12447	Q7RVV2,Q7RZH6,Q7S142,Q7S4E2,Q7S6C6,Q7S7B6,Q7S907,Q7SAI7,Q7SBG7,Q7SC07,Q7SDN1,Q7SHA4,Q871J7,Q9P729	A2Q8H9,A2Q959,A2QCG7,A2QDM1,A2QFN8,A2QG56,A2QGE5,A2QGK2,A2QHC8,A2QI88,A2QJS8,A2QK96,A2QKD6,A2QMK1,A2QQ01,A2QQ41,A2QR02,A2QWE2,A2R144,A2R2R6,A2R348,A2R3X4,A2R7I3,A2R9J6,A5AB32	g10177.t1,g10273.t1,g10751.t1,g13154.t1,g13444.t1,g14552.t1,g14570.t1,g14696.t1,g14803.t1,g15682.t1,g1751.t1,g1782.t1,g328.t1,g3399.t1,g4187.t1,g4636.t1,g5032.t1,g5389.t1,g5416.t1,g5948.t1,g6158.t1,g7381.t1,g7564.t1,g8065.t1,g8243.t1,g8255.t1,g9992.t1
Ankyrin_rpt	IPR002110	IPR002110	Ankyrin repeat	PF00023.25	15	2	2	5	2	5	14	37	32	19	49	20	10	18	17	43	32	36	31	39	24	20	22	6	2	3	27.5	P25302,P35845	Q7RW59,Q7RZ30,Q7S064,Q7S807,Q7S8L8,Q7SAE7,Q7SBG9,Q7SDF9,Q7SG78,Q7SI71	A2Q9P9,A2QAR6,A2QE53,A2QE82,A2QGG2,A2QHK8,A2QJN7,A2QL59,A2QLF0,A2QLQ9,A2QM57,A2QN97,A2QS32,A2QSL8,A2QSU1,A2QV38,A2QWG9,A2QWL9,A2QWQ4,A2QWQ7,A2QX66,A2QY62,A2QYD5,A2QYD9,A2QYW7,A2QZP4,A2QZV5,A2R3Q1,A2R6B0,A2RAC1,A2RAH5,A5AAG3	g10567.t1,g11183.t1,g12078.t1,g12609.t1,g12694.t1,g127.t1,g13465.t1,g13665.t1,g15593.t1,g221.t1,g2779.t1,g2999.t1,g3509.t1,g3841.t1,g3858.t1,g4445.t1,g5388.t1,g6562.t1,g6586.t1,g6602.t1,g8350.t1,g9982.t1
ABC_transptr_TM_dom	IPR001140	IPR001140	ABC transporter, transmembrane domain	PF00664.18	15	14	7	11	10	16	15	33	33	23	25	22	16	28	25	25	27	33	32	39	30	19	20	20	19	11	27.5	P12866,P14772,P32386,P33310,P33311,P36028,P38735,P39109,P40416,P53049	Q7RVU0,Q7RX59,Q7RY95,Q7S0L1,Q7S0S1,Q7S1X2,Q7S2E6,Q7S770,Q7S940,Q7S9G5,Q7SCP7,Q7SF27,Q7SGQ7,Q7SGU1,Q872R8,Q9C229	A2Q976,A2QA30,A2QGG4,A2QGK5,A2QGP8,A2QGY0,A2QGY9,A2QIJ0,A2QJH1,A2QJU9,A2QKR4,A2QKW8,A2QL42,A2QN01,A2QQF3,A2QR58,A2QRA7,A2QRB6,A2QSG1,A2QSX9,A2QTD5,A2QX64,A2QX68,A2QYZ9,A2QZA4,A2R1T2,A2R374,A2R5R6,A2R6W3,A2R8D4,A2R9K7,A5AAB7,A5AAV0	g10134.t1,g10709.t1,g11411.t1,g13480.t1,g14125.t1,g14546.t1,g16029.t1,g1905.t1,g2062.t1,g2652.t1,g392.t1,g5111.t1,g5515.t1,g5569.t1,g5720.t1,g6318.t1,g7581.t1,g8730.t1,g8774.t1,g9007.t1
NmrA	IPR008030	IPR008030	NmrA-like	PF05368.8	5	6	1	1	0	1	10	32	42	24	21	23	9	21	27	60	19	25	42	100	26	30	28	16	3	0	26.5		P23762,Q7S011,Q7S0C8,Q7S0H1,Q7S289,Q7S346,Q7S3C0,Q7S686,Q870X9	A2Q962,A2QAD2,A2QAG1,A2QBQ8,A2QDZ3,A2QEJ8,A2QH34,A2QJA0,A2QKE7,A2QMW2,A2QQ48,A2QS39,A2QT20,A2QTY6,A2QUA2,A2QV49,A2QVG7,A2QW68,A2QWK1,A2QYT5,A2QYV3,A2QYW9,A2QZ04,A2QZ11,A2QZK7,A2R027,A2R114,A2R115,A2R302,A2R3J7,A2R485,A2R522,A2R5K4,A2R5S3,A2R5T3,A2R6L7,A2R6P5,A2R6S0,A2R745,A2R8A8,A2RAD8,A5ABF9	g1107.t1,g11148.t1,g1158.t1,g11745.t1,g13081.t1,g13257.t1,g13298.t1,g13690.t1,g13735.t1,g13757.t1,g15797.t1,g1886.t1,g3022.t1,g3034.t1,g3150.t1,g4378.t1,g5404.t1,g6271.t1,g6325.t1,g6891.t1,g7061.t1,g7666.t1,g7877.t1,g8212.t1,g8369.t1,g8766.t1,g904.t1,g9100.t1
DnaJ_N	IPR001623	IPR001623	DnaJ domain	PF00226.26	32	24	23	21	21	24	24	23	28	25	26	32	25	22	25	25	25	23	25	27	26	25	25	21	26	31	25	P14906,P25294,P25303,P25491,P32527,P35191,P39101,P39102,P40358,P40564,P42834,P43613,P46997,P47138,P48353,P52868,P53193,P53863,P53940,Q07914,Q12350	Q7RXN8,Q7RXN9,Q7RXY0,Q7RZ00,Q7S0P9,Q7S1F9,Q7S3X8,Q7S4D5,Q7S4Z8,Q7S5D8,Q7S6F9,Q7S9D3,Q7S9D6,Q7S9J3,Q7SBA2,Q7SEK8,Q7SG73,Q7SG74,Q86ZH5,Q871C9,Q871H1,Q873F3,Q9C2F0,Q9C2N6,Q9P3Q8	A2Q8G7,A2Q8K0,A2QAX0,A2QB50,A2QC20,A2QCJ3,A2QIM6,A2QKP2,A2QL08,A2QS01,A2QSQ2,A2QUC9,A2QY43,A2QYA7,A2QYN7,A2QZY2,A2R013,A2R2Q3,A2R367,A2R471,A2R654,A2R8U3,A2R9B4,A2RAM7,A2RAP3,A2RBE8,A2RBF0,A5AAM6	g10591.t1,g11687.t1,g11874.t1,g13026.t1,g13167.t1,g13947.t1,g14208.t1,g14379.t1,g2792.t1,g3697.t1,g3727.t1,g422.t1,g4585.t1,g5317.t1,g5694.t1,g5737.t1,g598.t1,g6086.t1,g6196.t1,g6782.t1,g7410.t1,g8503.t1,g8646.t1,g9263.t1,g9274.t1
	IPR025110	IPR025110	AMP-binding enzyme C-terminal domain	PF13193.1	18	3	4	4	4	16	29	43	39	44	33	32	16	26	22	28	24	28	34	35	21	20	24	16	18	4	25	P07702,P38137,P52910,Q01574	P16929,Q7RWW3,Q7RXZ8,Q7S4F3,Q7S4Y7,Q7S557,Q7S6D3,Q7S7A6,Q7S7F6,Q7S7K3,Q7SDM6,Q7SDW1,Q7SG79,Q7SHX6,Q7SI43,Q9P3Q7	A2Q968,A2QCE9,A2QFT0,A2QH58,A2QHV2,A2QIQ3,A2QIQ8,A2QJ10,A2QJ30,A2QJ93,A2QK86,A2QKJ0,A2QKQ9,A2QLH9,A2QLI1,A2QLX4,A2QND1,A2QPE7,A2QQF1,A2QQX9,A2QRH8,A2QRV7,A2QTE5,A2QXP6,A2QYG7,A2QYT6,A2R037,A2R200,A2R3M8,A2R3V6,A2R463,A2R4X6,A2R6D2,A2R6H0,A2R7U9,A2R8D2,A2RAN7,A5AAI8,A5ABE0	g11234.t1,g1154.t1,g12101.t1,g12565.t1,g12932.t1,g13240.t1,g13361.t1,g1337.t1,g14204.t1,g14537.t1,g1473.t1,g1500.t1,g16160.t1,g16240.t1,g2281.t1,g4467.t1,g4617.t1,g4851.t1,g5523.t1,g5814.t1,g659.t1,g8056.t1,g8474.t1,g8860.t1
SNF2_N	IPR000330	IPR000330	SNF2-related	PF00176.18	27	18	17	19	17	20	22	28	27	24	25	33	25	25	25	29	23	23	30	35	28	23	24	15	17	58	25	P22082,P31244,P31380,P32333,P32597,P32657,P32849,P32863,P38086,P38144,P40352,P43610,P53115,Q05471,Q06554,Q08562,Q08773	Q7RVS3,Q7RXH5,Q7RYI6,Q7RZ29,Q7RZ50,Q7S0Q1,Q7S133,Q7S159,Q7S1P9,Q7S1Z7,Q7S2H0,Q7S6P9,Q7S7G9,Q7S7H0,Q7S8T9,Q7SAC4,Q7SAR3,Q7SBC8,Q7SBI2,Q7SD03,Q7SHJ1,Q7SI21,Q872I5,Q9HE48,Q9HE51	A2Q9U8,A2Q9V0,A2QAZ0,A2QB33,A2QC42,A2QES1,A2QHB0,A2QJ50,A2QP62,A2QQE1,A2QRG3,A2QSB2,A2QSF7,A2QTI7,A2QWZ3,A2QY71,A2QZF8,A2R176,A2R2K5,A2R3B8,A2R3W4,A2R942,A2R9E2,A2R9E3,A2R9H9,A2RAN4,A2RBF2	g10113.t1,g10659.t1,g12302.t1,g13677.t1,g1417.t1,g14223.t1,g14581.t1,g15098.t1,g15204.t1,g15299.t1,g15471.t1,g192.t1,g2261.t1,g4234.t1,g4841.t1,g5072.t1,g509.t1,g6038.t1,g6971.t1,g7967.t1,g9475.t1,g9520.t1,g9707.t1,g9866.t1
Metallo-dependent_phosphatase	IPR004843	IPR004843	Phosphoesterase domain	PF00149.23	35	18	19	16	21	30	26	23	23	22	28	22	24	21	24	28	30	27	26	28	24	21	24	17	19	15	25	P14747,P20604,P23287,P23594,P23595,P24309,P26570,P32345,P32598,P32829,P32838,P32945,P33329,P38887,P40152,P40533,P40986,P53043,Q04119,Q05924,Q12212	O14428,O93835,P48580,Q05681,Q7RVV1,Q7RVY0,Q7RW12,Q7RY32,Q7S264,Q7S274,Q7S852,Q7S9T1,Q7SBG6,Q7SER6,Q7SHG4,Q7SHY7,Q871S2,Q8NIW6,Q8X0M0,Q9C1L7,Q9C291,Q9P3I1,Q9P3S1,Q9UW86	A2Q7C1,A2Q8F1,A2QAK2,A2QGD4,A2QGF8,A2QMX2,A2QP89,A2QQT2,A2QRV2,A2QS27,A2QVB8,A2QYY7,A2QYY8,A2R120,A2R1M4,A2R9C6,A2RA93,A2RAP0,A2RAW6,A5AAY4,A5ABH7,A5ABK2,A5ABY8	g10238.t1,g11533.t1,g14793.t1,g15179.t1,g15242.t1,g2080.t1,g2773.t1,g3239.t1,g3288.t1,g4240.t1,g5704.t1,g6198.t1,g6544.t1,g6799.t1,g7792.t1,g7997.t1,g83.t1,g8757.t1,g893.t1,g9015.t1,g9067.t1,g9211.t1,g9334.t1,g9735.t1
Aldehyde_DH_dom	IPR015590	IPR015590	Aldehyde dehydrogenase domain	PF00171.17	16	11	12	10	10	15	14	32	29	28	38	24	14	19	21	25	23	25	32	70	25	24	38	21	17	13	24.5	P07275,P38067,P38694,P40047,P46367,P47771,P54114,P54115,P54885,Q04458	Q7RYT1,Q7S275,Q7S5U4,Q7S8W6,Q7SDE2,Q7SDT4,Q7SET1,Q7SF12,Q7SF44,Q7SFB1,Q870P2,Q871V7,Q8NIT1,Q8X0L4	A2Q7G4,A2Q9M6,A2Q9V7,A2QBG5,A2QC50,A2QI83,A2QIG1,A2QMA4,A2QNB0,A2QRU8,A2QSI3,A2QSZ7,A2QU06,A2QV34,A2QWR5,A2R0T2,A2R1P2,A2R2P1,A2R332,A2R4V5,A2R5X5,A2R8H6,A2R911,A2R9D4,A2RAR4,A2RAR9,A5AAZ8,A5ABS7,A5AC05	g10741.t1,g10893.t1,g11169.t1,g11312.t1,g1150.t1,g11651.t1,g11736.t1,g11816.t1,g11871.t1,g12162.t1,g12475.t1,g1256.t1,g12573.t1,g13609.t1,g13992.t1,g13995.t1,g14866.t1,g14917.t1,g15231.t1,g15233.t1,g15889.t1,g1768.t1,g1807.t1,g2986.t1,g3200.t1,g4568.t1,g4979.t1,g5039.t1,g5046.t1,g6534.t1,g7049.t1,g7197.t1,g7916.t1,g8193.t1,g8478.t1,g886.t1,g9777.t1,g978.t1
ATPase_P-typ_ATPase-assoc-dom	IPR008250	IPR008250	P-type ATPase, A domain	PF00122.15	40	17	16	13	16	13	18	24	22	21	31	20	18	23	21	20	25	27	27	34	26	21	26	15	17	16	24	P05030,P13586,P13587,P19657,P32660,P38360,P38929,P38995,P39524,P39986,P40527,Q01896,Q12674,Q12675,Q12691,Q12697	P07038,Q7RVS6,Q7RWH5,Q7RZE4,Q7RZL3,Q7S1D7,Q7S316,Q7S7W1,Q7S836,Q7S919,Q7SF11,Q7SGS2,Q9HED0,Q9UUX7,Q9UUX9,Q9UUY0,Q9UUY1,Q9UUY2	A2Q8V1,A2Q9J7,A2QDA2,A2QDY5,A2QE57,A2QEX1,A2QFG4,A2QJE9,A2QQN0,A2QT41,A2QT61,A2QTT0,A2QUK4,A2QZD0,A2R0J1,A2R2X5,A2R4T3,A2R4W4,A2R850,A2R9R3,A2RBD0,A2RBM0	g10204.t1,g10508.t1,g11128.t1,g11421.t1,g12401.t1,g12588.t1,g12865.t1,g13551.t1,g13777.t1,g15035.t1,g15882.t1,g2540.t1,g2678.t1,g27.t1,g2828.t1,g3277.t1,g488.t1,g5211.t1,g5542.t1,g5890.t1,g6119.t1,g6238.t1,g7148.t1,g8325.t1,g849.t1,g9778.t1
Cyt_B5	IPR001199	IPR001199	Cytochrome b5-like heme/steroid binding domain	PF00173.23	35	13	12	10	6	14	16	30	28	28	29	22	20	21	21	24	20	23	25	35	27	24	25	22	18	18	23.5	P00175,P21147,P40312,Q03529,Q04772,Q12091	P08619,Q01285,Q7RW89,Q7RX26,Q7RXD7,Q7S0C1,Q7S3C2,Q7S476,Q7S4Z9,Q7S582,Q7S8C6,Q7S8J5,Q7S981,Q7SC03,Q7SGM3,Q7SHN7,Q86ZG6,Q8NIX4,Q8X0J4,Q9P5L0	A2Q7D3,A2Q951,A2QA06,A2QAA1,A2QB78,A2QC55,A2QC57,A2QHP2,A2QIA6,A2QIF1,A2QJX1,A2QKI1,A2QMF9,A2QNS0,A2QPB9,A2QPC0,A2QRD2,A2QTJ1,A2QW99,A2QYV9,A2QZX1,A2R0V5,A2R2X1,A2R7R2,A2R895,A2R8H3,A5AB91,A5ABH5	g11071.t1,g1321.t1,g13299.t1,g13332.t1,g1477.t1,g14845.t1,g14868.t1,g14870.t1,g15328.t1,g343.t1,g3728.t1,g419.t1,g4554.t1,g5345.t1,g5731.t1,g6514.t1,g6554.t1,g773.t1,g7780.t1,g7785.t1,g8343.t1,g8983.t1,g9279.t1,g9531.t1,g9932.t1
Amidase	IPR000120	IPR000120	Amidase	PF01425.16	2	9	4	3	3	10	14	22	20	17	21	27	7	14	14	29	23	22	24	43	23	15	16	12	7	3	22.5	P22580,P32528,Q03557	Q7RWL7,Q7S8T1,Q7SCV1,Q7SFP8,Q7SGQ9,Q7SHZ2,Q9P3A1	A2Q7C3,A2QAR8,A2QAW3,A2QBI7,A2QBK2,A2QFQ9,A2QH78,A2QKY4,A2QLY0,A2QN05,A2QT67,A2QUA9,A2QVX6,A2QXG7,A2QYF2,A2R2G6,A2R3H3,A2R4G0,A2R8K8,Q9C1C9	g10253.t1,g10666.t1,g10809.t1,g11283.t1,g12086.t1,g12429.t1,g12759.t1,g12766.t1,g13381.t1,g13996.t1,g2738.t1,g5407.t1,g6867.t1,g7167.t1,g8198.t1,g8219.t1
FAD-dep_OxRdtase	IPR006076	IPR006076	FAD dependent oxidoreductase	PF01266.19	10	8	7	7	3	7	12	40	28	23	33	26	11	24	12	14	21	22	31	63	24	17	29	10	8	6	21.5	P32191,P38758,Q08822	Q7RWL5,Q7S059,Q7S638,Q7S6T9,Q7S8B3,Q7SAJ3,Q7SCB1,Q7SFL3,Q7SFW4,Q8NIZ9,Q9C1L2	A2Q7K8,A2Q7Z0,A2Q835,A2QCG5,A2QE12,A2QH77,A2QK95,A2QLT3,A2QNB1,A2QPU3,A2QQ52,A2QR31,A2QT11,A2QTA9,A2QWI9,A2QZN4,A2R2L9,A2R376,A2R3T1,A2R4S3,A2R4X7,A2R4Z9,A2R539,A2R5H7,A2R6D7,A2R6P1,A2R7L4,A2R9A3	g10406.t1,g1067.t1,g1142.t1,g12866.t1,g13252.t1,g13478.t1,g13479.t1,g13515.t1,g14981.t1,g15236.t1,g15875.t1,g15984.t1,g16229.t1,g2834.t1,g2837.t1,g2841.t1,g3326.t1,g3440.t1,g3588.t1,g3635.t1,g3904.t1,g395.t1,g3950.t1,g4986.t1,g5047.t1,g6380.t1,g7665.t1,g7699.t1,g8029.t1
Aminotransferase_I/II	IPR004839	IPR004839	Aminotransferase, class I/classII	PF00155.16	22	15	15	11	12	14	17	37	33	24	23	16	12	17	19	22	20	22	21	33	19	21	19	16	13	17	20.5	P07172,P09950,P10356,P23542,P25045,P38840,P40970,P47039,P52892,P52893,P53090,Q01802	Q7RVY5,Q7RW68,Q7RXZ7,Q7RZ96,Q7S0A8,Q7S0F9,Q7S9U6,Q7S9X7,Q7SC43,Q7SHS1,Q8NIT2,Q9C2H6	A2Q971,A2QAL3,A2QAR4,A2QBH1,A2QCR0,A2QD20,A2QEG9,A2QFM3,A2QFX5,A2QHV1,A2QIY1,A2QJ17,A2QJA6,A2QLK3,A2QLN2,A2QPE6,A2QQY0,A2QSY0,A2QTK1,A2QUB8,A2QVT9,A2QWK9,A2QYE2,A2QZS8,A2R099,A2R0Y4,A2R526,A2R823,A2R9H8,A2RA90,A2RAN9,A5AAC2,Q58FL7	g10035.t1,g10331.t1,g10595.t1,g1279.t1,g13243.t1,g1364.t1,g13643.t1,g14925.t1,g15091.t1,g2260.t1,g2959.t1,g3047.t1,g3567.t1,g3607.t1,g5091.t1,g5240.t1,g8963.t1,g926.t1,g9511.t1
GMC_OxRdtase_N	IPR000172	IPR000172	Glucose-methanol-choline oxidoreductase, N-terminal	PF00732.14	3	2	1	2	0	1	5	32	31	26	24	39	9	27	15	13	15	19	21	35	33	26	26	33	10	9	20		Q7RXM0,Q7S0Y1,Q7S2V1,Q7S2Z2,Q7S3S9,Q7S5S3,Q7S662,Q7SD15,Q8X0N8	A2Q9Z3,A2QB13,A2QBC3,A2QBK8,A2QE39,A2QEM1,A2QFN1,A2QH57,A2QIB9,A2QK04,A2QL33,A2QM15,A2QS43,A2QUZ0,A2QWL1,A2QWL3,A2QZ31,A2QZD3,A2R042,A2R0W2,A2R134,A2R1P5,A2R339,A2R501,A2R590,A2R5M3,A2R832,A2R910,A2R9X3,A2RB46,A5ABY0	g10084.t1,g11006.t1,g11041.t1,g11092.t1,g13493.t1,g13673.t1,g15829.t1,g2022.t1,g2435.t1,g3119.t1,g3144.t1,g4328.t1,g5743.t1,g6138.t1,g6277.t1,g6692.t1,g686.t1,g6899.t1,g707.t1,g7458.t1,g7904.t1,g8441.t1,g9161.t1,g9396.t1,g95.t1,g9970.t1
GMC_OxRtase_C	IPR007867	IPR007867	Glucose-methanol-choline oxidoreductase, C-terminal	PF05199.8	2	2	1	2	0	1	4	32	31	24	23	36	10	23	14	14	14	18	22	35	35	25	26	35	10	9	20		Q7RXM0,Q7S0Y1,Q7S2V1,Q7S2Z2,Q7S3S9,Q7S5S3,Q7S662,Q7S9A6,Q7SD15,Q8X0N8	A2Q9Z3,A2QB13,A2QBC3,A2QBK8,A2QE39,A2QEM1,A2QFN1,A2QH57,A2QIB9,A2QK04,A2QL33,A2QM15,A2QS43,A2QUZ0,A2QWL1,A2QWL3,A2QZ31,A2QZD3,A2R042,A2R0W2,A2R134,A2R1P5,A2R339,A2R501,A2R590,A2R5M3,A2R832,A2R910,A2R9X3,A2RB46,A5ABY0	g10084.t1,g11006.t1,g11041.t1,g11092.t1,g13493.t1,g13673.t1,g15829.t1,g2022.t1,g2435.t1,g3119.t1,g3144.t1,g4328.t1,g5743.t1,g6138.t1,g6277.t1,g6692.t1,g686.t1,g6899.t1,g707.t1,g7458.t1,g7904.t1,g8441.t1,g9161.t1,g9396.t1,g95.t1,g9970.t1
HAD-like_dom	IPR023214	IPR023214	HAD-like domain	PF00702.21	28	11	10	9	11	8	14	20	18	19	29	17	15	19	17	17	21	23	23	28	23	18	23	10	12	12	20	P05030,P13586,P13587,P19657,P38360,P38929,P38995,P40527,Q01896,Q12674,Q12691	P07038,Q7RVS6,Q7RZE4,Q7S1D7,Q7S316,Q7S7W1,Q7S836,Q7S919,Q7SGS2,Q9HED0,Q9UUX7,Q9UUX9,Q9UUY0,Q9UUY1,Q9UUY2	A2Q8V1,A2Q9J7,A2QDA2,A2QDY5,A2QE56,A2QEX1,A2QFG4,A2QJE9,A2QQN0,A2QT41,A2QT61,A2QUK4,A2R2X5,A2R4T3,A2R4W4,A2R850,A2RBD0,A2RBM0	g10204.t1,g10508.t1,g11128.t1,g12401.t1,g12588.t1,g12865.t1,g13551.t1,g15035.t1,g15481.t1,g15702.t1,g15882.t1,g2678.t1,g27.t1,g2828.t1,g488.t1,g5211.t1,g5542.t1,g5890.t1,g6119.t1,g6238.t1,g7148.t1,g8325.t1,g849.t1
Peptidase_A1	IPR001461	IPR001461	Aspartic peptidase	PF00026.18	35	9	13	8	8	38	6	13	12	10	9	20	17	20	18	21	25	32	20	21	16	16	14	54	9	17	20	P07267,P12630,P32329,P40583,P53057,P53379,Q06325,Q12303	Q01294,Q7RZM6,Q7RZW2,Q7S0Y9,Q7S2N8,Q7S314,Q7S3R4,Q7S4C3,Q7S6G0,Q7SBZ9,Q7SCF6,Q7SD30,Q7SDD9,Q7SEJ5,Q7SEW4,Q7SH13,Q9C217	A2Q7E3,A2QDI4,A2QM62,A2QXJ2,A2QZ14,A2R1R2,A2R3L3,A2R613,A2R6F6,A5AAJ6,A5ABG6,A5ABS5	g1016.t1,g10335.t1,g10652.t1,g10882.t1,g11679.t1,g13082.t1,g1366.t1,g14200.t1,g15535.t1,g1988.t1,g456.t1,g4875.t1,g8602.t1,g876.t1
CarbesteraseB	IPR002018	IPR002018	Carboxylesterase, type B	PF00135.23	2	0	0	0	0	4	3	40	44	22	22	33	10	20	13	20	12	14	26	47	26	19	19	11	8	6	19.5		Q7RWP5,Q7RXK3,Q7RZS2,Q7S0I4,Q7S3T7,Q7S4M5,Q7S844,Q7SDR2,Q7SH50,Q872U5	A2QBH3,A2QE77,A2QF54,A2QFE9,A2QG33,A2QH76,A2QHE2,A2QHE9,A2QI32,A2QK84,A2QL89,A2QL90,A2QLA0,A2QMK5,A2QN56,A2QS22,A2QS46,A2QST4,A2QTI9,A2QTZ0,A2QUC1,A2QV27,A2QX92,A2QYF0,A2QYS7,A2QZ72,A2QZN6,A2QZR0,A2QZX4,A2R0P4,A2R1N7,A2R1R5,A2R273,A2R2I5,A2R496,A2R502,A2R5R4,A2R6H5,A2R8R3,A2R8Z3,A5ABE5,A5ABE8,A5ABH9,A5ABK1	g10195.t1,g10299.t1,g1104.t1,g12426.t1,g12669.t1,g13086.t1,g15229.t1,g15230.t1,g15836.t1,g2150.t1,g2926.t1,g3009.t1,g4385.t1,g50.t1,g5411.t1,g5760.t1,g668.t1,g7619.t1,g9148.t1
AA/rel_permease1	IPR002293	IPR002293	Amino acid/polyamine transporter I	PF13520.1	16	11	12	6	5	14	18	47	40	31	34	28	8	14	17	17	22	23	31	49	20	19	17	15	8	9	19.5	P19807,P32837,P38734,P50276,P53744	O59942,Q7RZ19,Q7S1S4,Q7S3S5,Q7S4C6,Q7S5R7,Q7SI04,Q9HED4	A2Q7U1,A2Q863,A2QA04,A2QAZ1,A2QBJ2,A2QD58,A2QDU5,A2QE63,A2QE85,A2QFP1,A2QFR1,A2QGZ8,A2QIL4,A2QJG2,A2QKU6,A2QM01,A2QPY5,A2QR65,A2QRZ8,A2QT74,A2QTL7,A2QTV0,A2QUB1,A2QXF9,A2R0V1,A2R0W1,A2R1N5,A2R2T1,A2R305,A2R4G4,A2R4X1,A2R6U1,A2R713,A2R721,A2R7F1,A2R7Z7,A2R873,A2R8P6,A2R9I4,A5ABY3	g11741.t1,g11753.t1,g12224.t1,g15891.t1,g172.t1,g3640.t1,g5979.t1,g6291.t1,g6981.t1,g7162.t1,g7221.t1,g730.t1,g8070.t1,g8158.t1,g9370.t1,g9371.t1,g9501.t1
Ketoacyl_synth_N	IPR014030	IPR014030	Beta-ketoacyl synthase, N-terminal	PF00109.21	3	2	2	2	2	2	9	35	51	35	27	26	9	31	17	23	21	35	18	16	44	11	8	2	5	2	19.5	P19097,P39525	Q7RVN4,Q7RWC7,Q7S0Q5,Q7S0T8,Q7S380,Q7S736,Q7SA54,Q7SC21,Q7SHI6	A2Q7B6,A2Q7L3,A2Q977,A2Q979,A2QBL3,A2QDU0,A2QE52,A2QFE2,A2QG45,A2QH06,A2QH36,A2QHC4,A2QIQ4,A2QK66,A2QKB6,A2QM70,A2QQV0,A2QSJ3,A2QT95,A2QTE9,A2QTF6,A2QTG4,A2QTH2,A2QUE2,A2QUI2,A2QUW6,A2QV15,A2QW54,A2QW90,A2QWL0,A2QWP6,A2QWP8,A2QWU2,A2QX22,A2QXP7,A2QYP5,A2QYQ2,A2QYV7,A2QYW3,A2R022,A2R1U2,A2R1Y8,A2R1Z2,A2R2T7,A2R3M8,A2R4Z4,A2R5P7,A2R6H1,A2R9X2,A5ABG0,A5AC09	g13622.t1,g14542.t1,g15719.t1,g3407.t1,g3969.t1,g4203.t1,g8206.t1,g8667.t1
Ketoacyl_synth_C	IPR014031	IPR014031	Beta-ketoacyl synthase, C-terminal	PF02801.17	3	2	2	2	2	2	9	35	50	34	27	25	9	30	15	22	21	33	18	15	43	12	8	1	5	2	19.5	P19097,P39525	Q7RVN4,Q7RWC7,Q7S0Q5,Q7S0T8,Q7S380,Q7S736,Q7SA54,Q7SC21,Q7SHI6	A2Q7B6,A2Q7L3,A2Q977,A2Q979,A2QBL3,A2QDU0,A2QE52,A2QFE2,A2QG45,A2QH06,A2QH36,A2QHC4,A2QIQ4,A2QK66,A2QKB6,A2QM70,A2QQV0,A2QSJ3,A2QT95,A2QTE9,A2QTF6,A2QTG4,A2QTH2,A2QUE2,A2QUI2,A2QUW6,A2QV15,A2QW54,A2QW90,A2QWL0,A2QWP6,A2QWP8,A2QWU2,A2QX22,A2QXP7,A2QYP5,A2QYQ2,A2QYV7,A2QYW3,A2R022,A2R1U2,A2R1Z2,A2R2T7,A2R3M8,A2R4Z4,A2R5P7,A2R6H1,A2R9X2,A5ABG0,A5AC09	g13622.t1,g14542.t1,g15719.t1,g3407.t1,g3969.t1,g4203.t1,g8206.t1,g8667.t1
Acyl_transferase	IPR014043	IPR014043	Acyl transferase	PF00698.16	2	2	2	2	1	2	10	37	50	33	27	27	9	30	17	23	21	33	18	15	45	11	8	1	5	4	19.5	P07149	Q7RWC7,Q7S0Q5,Q7S0T8,Q7S380,Q7S736,Q7SA55,Q7SC21,Q7SHI6,Q870P4	A2Q7L3,A2Q977,A2Q979,A2QBL3,A2QDU0,A2QE52,A2QG45,A2QH06,A2QH36,A2QHC4,A2QHI9,A2QIQ4,A2QK66,A2QKB6,A2QM70,A2QQV0,A2QSI6,A2QT95,A2QTD8,A2QTD9,A2QTE9,A2QTF6,A2QTH2,A2QUE2,A2QUI2,A2QUW6,A2QV17,A2QW54,A2QW90,A2QWL0,A2QWP6,A2QWP8,A2QWU2,A2QX22,A2QXP7,A2QYP6,A2QYQ2,A2QYV7,A2QYW3,A2R022,A2R1U2,A2R1Z2,A2R2T7,A2R3M8,A2R4Z4,A2R5P7,A2R6H1,A2R9X2,A5ABG0,A5AC09	g13622.t1,g14542.t1,g15719.t1,g1812.t1,g3407.t1,g3969.t1,g4204.t1,g8206.t1
Znf_C2H2	IPR007087	IPR007087	Zinc finger, C2H2	PF00096.21	25	14	13	11	19	10	13	9	22	18	25	25	16	20	11	19	13	14	24	31	21	19	23	17	10	21	19	P08153,P21192,P33400,P33748,P33749,P38704,P39933,P39943,P39959,P41696,P46974,P47043,P53243,P54785,Q00947,Q03081,Q12041,Q12145,Q12531	Q7RVQ8,Q7RVU3,Q7RW35,Q7RXC3,Q7RY67,Q7S0N1,Q7S248,Q7S3E6,Q7S5E3,Q7S8U3,Q7SBI5,Q7SE10,Q7SH58,Q8X0K9,Q96U34,Q9P6Z0	A2Q8H5,A2QB32,A2QBC6,A2QFM0,A2QG11,A2QIL8,A2QJ96,A2QJB1,A2QL51,A2QMC6,A2QN03,A2QQA9,A2QQD3,A2QRQ4,A2QSW2,A2QT69,A2QZ28,A2QZI7,A2QZW6,A2R6U4,A5ABA0,A5ABV9	g11280.t1,g13206.t1,g14351.t1,g15491.t1,g15637.t1,g15905.t1,g16254.t1,g2157.t1,g2896.t1,g3750.t1,g4530.t1,g4810.t1,g5349.t1,g5509.t1,g5939.t1,g6951.t1,g7963.t1,g825.t1,g8634.t1,g8671.t1,g8744.t1,g9176.t1,g9470.t1
Glyco_hydro18cat	IPR001223	IPR001223	Glycoside hydrolase, family 18, catalytic domain	PF00704.23	14	3	2	2	1	3	13	18	13	20	9	16	11	15	19	26	19	27	19	25	20	19	10	10	3	17	19	Q06350	Q7RWD7,Q7RYA7,Q7S062,Q7S4F8,Q7S8L7,Q7S9A1,Q7SC26,Q7SE00,Q7SG57,Q7SGW0,Q7SGZ0	A2Q8S2,A2QF78,A2QIT7,A2QUK1,A2QUQ2,A2QVE9,A2QWN8,A2QZL4,A2R4D3,A2R4L6,A2RBJ5,A5AA94,A5AB48	g11721.t1,g12696.t1,g1308.t1,g13170.t1,g13724.t1,g15386.t1,g2740.t1,g3064.t1,g3659.t1,g7136.t1
Znf_RING	IPR001841	IPR001841	Zinc finger, RING-type	PF13639.1	22	17	14	23	11	18	14	19	19	22	19	52	20	15	15	16	13	14	20	20	20	22	23	11	16	98	18	P22470,P32849,P36096,P38239,P38748,Q04781,Q05568,Q06554,Q06651,Q06834,Q08109	Q7RWJ1,Q7RXE0,Q7S1Y8,Q7S1Z2,Q7S2H5,Q7S437,Q7S5V7,Q7S834,Q7S8M0,Q7SAR3,Q7SB71,Q7SDX8,Q7SE58,Q7SES3,Q7SHR3,Q873B9,Q8NJ06,Q8WZL0,Q9HE51,Q9HEC7	A2Q891,A2QC39,A2QC91,A2QD73,A2QHS0,A2QI07,A2QIJ5,A2QJB8,A2QK11,A2QPH6,A2QPW2,A2QRS6,A2QYF7,A2R5Z8,A2R787,A2R824,A2R936,A2R9E3,A2RBF2	g10126.t1,g10214.t1,g11879.t1,g12881.t1,g13576.t1,g14767.t1,g14815.t1,g15098.t1,g15569.t1,g1965.t1,g2009.t1,g2119.t1,g2320.t1,g2827.t1,g3421.t1,g5115.t1,g5168.t1,g5252.t1,g6121.t1,g7674.t1,g8737.t1,g9122.t1,g9888.t1
SET_dom	IPR001214	IPR001214	SET domain	PF00856.23	22	6	8	8	8	10	16	9	16	16	16	27	19	22	15	19	18	15	18	18	21	17	22	12	11	23	18	P36124,P38222,P38827,P38890,P42948,P46995,Q12504,Q12529	Q7RWX3,Q7RZR8,Q7RZU4,Q7S1R5,Q7S5G9,Q7S6L0,Q7SBJ9,Q7SBX0,Q7SCQ8,Q7SDP1,Q7SE87,Q7SEQ8,Q7SFG1,Q7SG46,Q7SGF2,Q7SH07,Q8X0S9,Q8X225,Q9C295	A2QAM0,A2QBL7,A2QCD7,A2QG54,A2QK76,A2QND4,A2QQQ8,A2QVH3,A2QZ73,A2R4M1,A2R669,A2R7W1,A2R9L2,A2RBI5,A5ABN5,A5ABP3	g10290.t1,g11215.t1,g11599.t1,g12023.t1,g12356.t1,g1292.t1,g13190.t1,g2111.t1,g3098.t1,g3377.t1,g3862.t1,g4354.t1,g5004.t1,g5380.t1,g5475.t1,g7524.t1,g859.t1,g8841.t1,g8870.t1,g8972.t1,g9618.t1,g9994.t1
AA-permease_dom	IPR004841	IPR004841	Amino acid permease/ SLC12A domain	PF00324.16	10	25	26	15	20	17	16	29	22	27	30	17	10	18	17	18	19	18	26	47	20	14	20	7	9	13	18	P04817,P06775,P15380,P19145,P25376,P32487,P36029,P38084,P38085,P38090,P38329,P38967,P38971,P41815,P43548,P48813,P53388,Q03770,Q08986,Q12372	Q7RYD9,Q7RZ39,Q7S5L3,Q7S6C3,Q7S8G5,Q7S9D4,Q7SE11,Q7SES5,Q8X0I5,Q9C258	A2QCD8,A2QCR1,A2QG22,A2QHN9,A2QI38,A2QK51,A2QK75,A2QKX2,A2QRZ9,A2QT12,A2QUT6,A2QVG0,A2QWR6,A2QZ32,A2QZA3,A2R0X1,A2R1D6,A2R1Q2,A2R261,A2R697,A2R7P2,A2R9T4	g10920.t1,g11226.t1,g11357.t1,g11775.t1,g12651.t1,g14020.t1,g14915.t1,g15081.t1,g16120.t1,g3148.t1,g3280.t1,g4566.t1,g4976.t1,g5034.t1,g5425.t1,g5566.t1,g6028.t1,g8485.t1,g933.t1,g9804.t1
AB_hydrolase_3	IPR013094	IPR013094	Alpha/beta hydrolase fold-3	PF07859.8	17	2	1	1	1	5	10	26	28	27	24	26	12	19	13	16	14	16	29	61	22	19	29	13	17	5	17.5	Q04066	Q7RV33,Q7S082,Q7S1H6,Q7S283,Q7S5D6,Q7S5V8,Q7S6E3,Q7S8H2,Q7SB04,Q7SBF9,Q872K5,Q9P5L8	A2Q7L6,A2Q8U6,A2QBH5,A2QBH8,A2QCT1,A2QDJ9,A2QF64,A2QG70,A2QHD5,A2QI58,A2QK90,A2QNF0,A2QRK3,A2QRV8,A2QS21,A2QS56,A2QUQ1,A2QVW8,A2QW64,A2QX56,A2QXE2,A2QZ17,A2QZB2,A2QZB7,A2QZK9,A2QZX0,A2R098,A2R2M3	g10140.t1,g10597.t1,g1140.t1,g12226.t1,g12238.t1,g1250.t1,g13122.t1,g13199.t1,g13551.t1,g13590.t1,g14299.t1,g14354.t1,g14628.t1,g14645.t1,g14887.t1,g2602.t1,g3323.t1,g3601.t1,g4879.t1,g4939.t1,g6594.t1,g6679.t1,g7269.t1,g7359.t1,g7880.t1,g8020.t1,g8184.t1,g8469.t1,g9050.t1
Aminoglycoside_PTrfase	IPR002575	IPR002575	Aminoglycoside phosphotransferase	PF01636.18	1	1	2	1	1	1	65	28	27	6	82	33	3	8	9	18	65	69	17	33	5	28	20	19	1	1	17.5	P40053	Q7RWM4,Q7S8H1,Q7SE60	A2Q8P0,A2QFW0,A2QGY7,A2QIA3,A2QK71,A2QKA3,A2QLB5,A2QLZ6,A2QNA7,A2QPK6,A2QQ35,A2QUN4,A2QUP9,A2QVK1,A2QWZ4,A2QX95,A2QXH8,A2QYL6,A2R000,A2R0E2,A2R1K6,A2R2Z6,A2R303,A2R541,A2R5U4,A2R672,A2R6B6	g11714.t1,g13506.t1,g1416.t1,g14707.t1,g15212.t1,g15624.t1,g16083.t1,g2536.t1,g3474.t1,g3512.t1,g3658.t1,g5404.t1,g567.t1,g5710.t1,g5778.t1,g7749.t1,g8117.t1,g8288.t1,g9336.t1,g9363.t1
UBQ-conjugat_E2	IPR000608	IPR000608	Ubiquitin-conjugating enzyme, E2	PF00179.21	14	11	10	11	11	10	14	17	17	18	17	21	15	17	17	17	17	13	16	17	18	18	18	13	15	15	17	P06104,P14682,P21734,P28263,P29340,P33296,P50623,P52490,P52491,P52492,Q02159	P52493,Q7RY50,Q7S086,Q7S6X1,Q7S7C4,Q7S7Z9,Q7S951,Q7SDB0,Q7SDM1,Q7SGR9,Q7SH41,Q871H3,Q8X0I8,Q9C2A5,Q9P725	A2Q7K3,A2QB39,A2QD15,A2QDZ9,A2QE08,A2QG50,A2QLF8,A2QLG6,A2QMZ8,A2QQS3,A2QSD2,A2QUM1,A2QWY5,A2R2C2,A2R588,A2R963,A5AAI6	g10055.t1,g11162.t1,g1126.t1,g11865.t1,g12008.t1,g12272.t1,g12813.t1,g12988.t1,g13812.t1,g14554.t1,g2175.t1,g2685.t1,g3278.t1,g432.t1,g4365.t1,g4883.t1,g5110.t1,g8143.t1
Cellulose-bd_dom_fun	IPR000254	IPR000254	Cellulose-binding domain, fungal	PF00734.13	3	0	0	2	0	0	0	3	8	7	6	12	20	22	14	22	2	4	12	12	20	28	8	27	0	0	17		Q7RW51,Q7RWN7,Q7RXM0,Q7RYA7,Q7S0T1,Q7S111,Q7S197,Q7S1P1,Q7S1W6,Q7S439,Q7SA23,Q7SCJ5,Q7SDR1,Q7SET6,Q7SHD9,Q7SHI8,Q871E8,Q872J7,Q872L7,Q872Q1	A2Q7T5,A2QAI7,A2QAI8,A2QYR9,A2R313,A2R5J9,A2R5N0,A2R8E0	g102.t1,g11019.t1,g12181.t1,g4332.t1,g8042.t1,g8156.t1,g838.t1,g98.t1
	IPR023753	IPR023753	Pyridine nucleotide-disulphide oxidoreductase, FAD/NAD(P)-binding domain	PF07992.9	23	9	9	11	10	7	12	21	18	12	16	16	10	14	15	18	16	21	23	27	17	16	18	16	11	8	16.5	P09624,P29509,P32340,P38816,P40215,P41921,P52923,Q02733,Q07500,Q12680	P38681,P51978,Q7RVX4,Q7RXQ5,Q7S1W8,Q7S2Y9,Q7S477,Q7S558,Q873E8,Q9P540	A2Q9P0,A2Q9Y6,A2QAR7,A2QCX6,A2QFQ4,A2QGK6,A2QGK8,A2QL68,A2QNS6,A2QPM1,A2QQZ5,A2QRD5,A2QUK3,A2QUV9,A2QXL0,A2QYA9,A2QYX5,A2R0R4	g117.t1,g12056.t1,g12120.t1,g12227.t1,g13301.t1,g13359.t1,g14570.t1,g15798.t1,g2740.t1,g4195.t1,g4395.t1,g4665.t1,g6679.t1,g8516.t1,g8696.t1,g8951.t1,g9281.t1,g9988.t1
Extracellular_membr_CFEM_dom	IPR008427	IPR008427	Extracellular membrane protein, CFEM domain	PF05730.6	0	6	6	1	1	2	8	3	7	7	9	13	10	20	14	17	11	16	18	26	25	15	16	3	0	6	16.5	O13547	Q7S1U4,Q7S5M9,Q7S923,Q7SC86,Q7SEP7,Q7SF01,Q7SHJ5,Q872R6,Q9C2R4,Q9P3F4	A2QLF4,A2QR23,A2QVA6,A2QZS4,A2R135,A2RBD7,A5ABK6	g11294.t1,g11545.t1,g11725.t1,g12379.t1,g12488.t1,g12686.t1,g14567.t1,g3714.t1,g3715.t1,g4090.t1,g4130.t1,g4536.t1,g7298.t1,g741.t1,g8979.t1,g9464.t1
OxRdtase_FAD/NAD-bd	IPR001433	IPR001433	Oxidoreductase FAD/NAD(P)-binding	PF00175.16	14	7	9	7	8	6	8	20	21	17	17	13	13	17	13	16	16	18	20	27	17	15	16	15	7	6	16.5	P16603,P36060,P38626,P39676,P39692,Q04516,Q12181,Q12746	P08619,Q7RXL1,Q7RZE3,Q7S074,Q7S875,Q7S8E0,Q7SDB4,Q7SEI4,Q7SEJ6,Q7SFY2,Q7SGM3,Q86ZH8,Q9HE34	A2Q7D3,A2Q898,A2Q966,A2QA06,A2QAM9,A2QCV4,A2QJG1,A2QKK3,A2QLV1,A2QPB9,A2QPC0,A2QRD2,A2QS05,A2QWW2,A2R2Z2,A2R666,A2R7A3,A2R9A9,A2RA35,A2RBJ1,A5AB91	g10673.t1,g11071.t1,g12887.t1,g13299.t1,g13640.t1,g14817.t1,g15582.t1,g2658.t1,g3075.t1,g4181.t1,g4554.t1,g457.t1,g6554.t1,g6604.t1,g8418.t1,g8496.t1
Glyco_hydro_16	IPR000757	IPR000757	Glycoside hydrolase, family 16	PF00722.16	8	3	3	2	3	3	6	10	10	10	13	16	14	17	16	16	16	17	20	19	21	12	12	13	12	4	16.5	P32623,P53301,Q05790	Q7RX89,Q7RYH1,Q7RZ43,Q7RZX8,Q7S0E3,Q7S0F8,Q7S222,Q7S3Q8,Q7S5Q4,Q7S6B8,Q7S7D0,Q7SBQ2,Q7SGL2,Q9C236	A2QAC9,A2QAL7,A2QM82,A2QVI4,A2R0U6,A2R1U8,A2R5S2,A2R7A5,A5AAF6,A5AAV4	g11928.t1,g12279.t1,g12543.t1,g1372.t1,g14093.t1,g4494.t1,g5094.t1,g5201.t1,g6396.t1,g7838.t1,g9156.t1,g9302.t1
Glyco_hydro_3_N	IPR001764	IPR001764	Glycoside hydrolase, family 3, N-terminal	PF00933.16	6	8	3	1	0	6	5	23	17	21	17	16	10	18	13	15	7	9	21	38	18	17	24	10	3	2	16		Q7RWP2,Q7S0W4,Q7S3R5,Q7S6H8,Q7S6Y6,Q7S786,Q7SET7,Q7SG54,Q7SGM9,Q9C2C4	A2QDM1,A2QH25,A2QLQ2,A2QLU4,A2QPK4,A2QS42,A2QWR0,A2R2S3,A2R4X0,A2R5M1,A2R914,A2R967,A2R989,A2RAL4,A5AAW4,A5ABF5,O00089	g10416.t1,g11044.t1,g11617.t1,g11886.t1,g14099.t1,g1555.t1,g1737.t1,g1889.t1,g2528.t1,g3164.t1,g3618.t1,g3814.t1,g4002.t1,g5554.t1,g5574.t1,g6005.t1,g6939.t1,g7159.t1,g7898.t1,g8015.t1,g8196.t1,g9392.t1,g9408.t1,g942.t1
Ras_GTPase	IPR001806	IPR001806	Small GTPase superfamily	PF00071.17	17	14	16	12	21	10	12	16	14	11	18	12	16	18	12	16	15	15	17	16	16	12	17	10	17	17	16	P01119,P01120,P06780,P07560,P13856,P25378,P32835,P32836,P32939,P36017,P36018,P36019,P38555,P38763,P38987,P48559,P51996,P53879,Q00245,Q00246,Q99260	P22126,Q01387,Q7RUH6,Q7RV73,Q7RVL0,Q7RVP4,Q7RVQ5,Q7RWE8,Q7RXE6,Q7RY07,Q7S5H7,Q7S789,Q7S8J6,Q7SEQ0,Q7SFD7,Q7SFE2	A2Q7X9,A2Q8Z1,A2QDA7,A2QI69,A2QKI8,A2QN33,A2QPR3,A2QSB1,A2QVG4,A2QY02,A2QY55,A2R2X2,A2R3U6,A2R5W0	g11431.t1,g11701.t1,g13041.t1,g13203.t1,g13278.t1,g13289.t1,g14337.t1,g1513.t1,g16176.t1,g2320.t1,g3879.t1,g417.t1,g5681.t1,g781.t1,g8621.t1,g8781.t1,g9200.t1
NUDIX_hydrolase_dom	IPR000086	IPR000086	NUDIX hydrolase domain	PF00293.23	23	8	9	6	7	9	8	21	14	13	19	15	14	14	15	18	20	21	15	17	20	12	16	11	12	10	16	P15496,P47173,P53164,P53550,Q01976,Q12524,Q99321	Q7RX10,Q7RZS1,Q7S0Z0,Q7S1Z3,Q7S674,Q7S8S0,Q7SAL2,Q7SB05,Q7SB27,Q7SDX5,Q7SE50,Q7SFA0,Q7SHK9,Q8X052	A2Q7W6,A2QAJ9,A2QBR5,A2QC00,A2QEP6,A2QGU3,A2QP45,A2QPL0,A2QQK6,A2QRX8,A2QUH6,A2QWJ7,A2R0V2,A2R473	g10642.t1,g10796.t1,g10798.t1,g11396.t1,g11780.t1,g12843.t1,g1301.t1,g14950.t1,g15584.t1,g2125.t1,g3696.t1,g526.t1,g6395.t1,g6480.t1,g8053.t1,g8936.t1
Epimerase_deHydtase	IPR001509	IPR001509	NAD-dependent epimerase/dehydratase	PF01370.16	12	16	10	8	6	13	2	27	29	13	19	18	11	8	14	29	10	15	21	40	21	17	13	13	6	6	16	P04397,P53111,P53183,Q03049,Q12068,Q12177	Q7RXD8,Q7RYQ7,Q7RZ32,Q7S017,Q7S0X3,Q7SBK1,Q7SD38,Q7SFE7,Q7SFT4,Q871C0,Q872P0	A2Q7R2,A2Q8K3,A2Q972,A2QAG7,A2QAP0,A2QDY8,A2QEJ5,A2QFV2,A2QFV5,A2QFY2,A2QG71,A2QG76,A2QQV4,A2QS37,A2QTE4,A2QXD5,A2QYI7,A2QZB1,A2QZB3,A2QZX6,A2R0Z8,A2R106,A2R118,A2R3C7,A2R486,A2R5H2,A2R6J0,A2R7T8,A5AAB0	g1137.t1,g13334.t1,g3498.t1,g3910.t1,g5066.t1,g5534.t1,g7763.t1,g7765.t1,g7813.t1,g8610.t1,g916.t1,g9569.t1,g968.t1
[truncated: 4,093 more rows]
