# Supplementary material for: De Novo Assembly and Genome Analyses of the Marine-Derived Scopulariopsis brevicaulis Strain LF580 Unravels Life-Style Traits and Anticancerous Scopularide Biosynthetic Gene Cluster
Source: PLoS One. 2015 Oct 27;10(10):e0140398. doi: 10.1371/journal.pone.0140398 (PMC4624724; doi:10.1371/journal.pone.0140398)
Supplement: S10 Table — Fungi1—Scopulariosis. (XLSX) [file pone.0140398.s013.xlsx]

## Sheet: Quality Distribution
Cycle	Fungi1_1		Fungi1_2
	Q.Avg	Q.Med	Q.Avg	Q.Med
1	31.87	31	31.45	31
2	32.16	34	31.6	33
3	32.27	34	31.67	33
4	35.86	37	35.15	37
5	35.67	37	35.12	37
6	35.69	37	35.13	37
7	35.68	37	35.09	37
8	35.66	37	35.07	37
9	37.31	39	36.55	39
10	37.25	39	36.57	39
11	37.21	39	36.49	39
12	37.17	39	36.44	39
13	37.16	39	36.4	39
14	38.43	40	37.56	40
15	38.37	40	37.5	40
16	38.29	40	37.42	40
17	38.21	40	37.3	40
18	38.14	40	37.22	40
19	38.12	40	37.19	40
20	38.01	40	37.06	40
21	37.93	40	36.91	40
22	37.83	40	36.81	39
23	37.69	40	36.67	39
24	37.59	40	36.58	39
25	37.46	40	36.42	39
26	37.54	40	36.24	39
27	37.5	40	36.09	39
28	37.46	40	36.08	39
29	37.36	40	35.95	39
30	37.27	40	35.82	39
31	37.12	40	36	39
32	36.98	39	35.95	39
33	36.85	39	35.94	39
34	36.82	39	35.87	39
35	36.68	39	35.68	39
36	36.56	39	35.57	39
37	36.41	39	35.43	39
38	36.27	39	35.21	39
39	36.1	39	35.03	38
40	35.95	39	34.81	38
41	35.69	38	34.63	38
42	35.48	38	34.44	38
43	35.29	38	34.16	38
44	35.07	38	33.9	38
45	34.78	38	33.69	37
46	34.59	38	33.45	37
47	34.37	37	33.15	37
48	34.1	37	32.91	36
49	33.87	37	32.63	36
50	33.59	36	32.29	36
51	33.31	36	30.88	34
52	33.05	35	31.29	35
53	32.74	35	31.51	35
54	32.45	35	31.5	35
55	32.18	35	31.34	35
56	31.88	35	31.06	35
57	31.56	35	30.78	35
58	31.28	35	30.51	35
59	31.02	35	30.22	35
60	30.73	34	29.92	34
61	30.42	34	29.61	34
62	30.1	34	29.26	34
63	29.81	34	28.92	34
64	29.54	34	28.65	34
65	29.26	34	28.4	34
66	28.99	34	28.12	34
67	28.7	33	27.85	33
68	28.38	33	27.51	33
69	28.12	33	27.15	33
70	27.83	33	26.87	33
71	27.5	33	26.56	33
72	27.26	33	26.29	33
73	26.98	33	26.02	33
74	26.74	33	25.69	32
75	26.45	32	25.41	32
76	25.44	31	25.1	32
77	25.85	31	24.76	31
78	26.02	32	24.41	31
79	25.99	32	24.14	31
80	25.84	32	23.8	31
81	25.61	32	23.53	31
82	25.37	32	23.21	30
83	25.07	32	22.86	30
84	24.81	32	22.53	30
85	24.53	31	22.16	29
86	24.22	31	21.77	29
87	23.92	31	21.43	29
88	23.57	31	21.07	29
89	23.27	31	20.69	28
90	22.94	31	20.32	27
91	22.58	30	19.91	27
92	22.22	30	19.51	25
93	21.81	30	19.09	25
94	21.39	29	18.66	25
95	20.9	29	18.21	24
96	20.51	29	17.72	23
97	20.02	27	17.22	19
98	19.35	27	16.68	17
99	18.75	25	16.15	2
100	18.23	24	15.63	2
101	17.06	20	14.3	2
Average quality scores per cycle

## Sheet: Base Report
* Software : Illumina Pipeline (CASAVA) v1.8.0
* Fastq Encoding : Sanger format ( ASCII 33 ~ )
Sample	Seq info	Base_A	Base_C	Base_G	Base_T	Base_N	Total Bases	Read Count
Fungi1	Fungi1_1	2897836339	3318361548	3409172804	2883131262	6627722	12515129675	123912175
	Fungi1_2	2891227423	3293807599	3465532284	2861016248	3546121	12515129675	123912175
